# Supplementary material for: Proteomic Landscape Uncovers Chemotherapy Resistance, Relapse Mechanisms, and Molecular Subtypes in Primary Central Nervous System Lymphoma for Precision Therapeutics
Source: Research Square preprint supplement (doi:10.21203/rs.3.rs-6419495/v1), 2025-04-11
Supplement: Supplementary file 1 [file 3d2ae297641e4b8ff11bc37a.xlsx]

## Sheet: Summary
Header line description of worksheet "Protein_quant"
Protein accession	Protein accession number of database used for search
Protein description	Protein functional description
Gene name	Name of the gene associated to the protein sequence
Peptides	Number of peptides which spectrums hit
Unique peptides	Number of unique peptides which spectrums hit
Header line description of worksheet "Peptide_quant"
Sequence	Identified peptide amino acid sequence
Length	Identified peptide amino acid length
Protein accession	Protein accession number of database used for search
Protein description	Protein functional description
Gene name	Name of the gene associated to the protein sequence
Charge	The charge-state of the peptide
Unique [yes/no]	The peptide is or no unique to a single protein group

## Sheet: Protein_quant
Protein accession	Protein description	Gene name	Peptides	Unique peptides	Intensity FFPE_1	Intensity FFPE_2	Intensity FFPE_3	Intensity FFPE_4	Intensity FFPE_5	Intensity FFPE_6	Intensity FFPE_7	Intensity FFPE_8	Intensity FFPE_9	Intensity FFPE_10	Intensity FFPE_11	Intensity FFPE_12	Intensity FFPE_13	Intensity FFPE_14	Intensity FFPE_15	Intensity FFPE_16	Intensity FFPE_17	Intensity FFPE_18	Intensity FFPE_19	Intensity FFPE_20	Intensity FFPE_21	Intensity FFPE_22	Intensity FFPE_23	Intensity FFPE_24	Intensity FFPE_25	Intensity FFPE_26	Intensity FFPE_27	Intensity FFPE_28	Intensity FFPE_29	Intensity FFPE_30	Intensity FFPE_31	Intensity FFPE_32	Intensity FFPE_33	Intensity FFPE_34	Intensity FFPE_35	Intensity FFPE_36	Intensity FFPE_37	Intensity FFPE_38	Intensity FFPE_39	Intensity FFPE_40	Intensity FFPE_41	Intensity FFPE_42	Intensity FFPE_43	Intensity FFPE_44	Intensity FFPE_45
A0A024RBG1	Diphosphoinositol polyphosphate phosphohydrolase NUDT4B	NUDT4B	3	1	2149.17	1262.98	1127.88	1121.6	4237.28	1160.67	509.029			2168.33		2529	722.672	314.379	1791.29	1246.74	1045.61	1591.63	4394.1	570.568			1140.4	2137.29	2646.05		999.04	526.13				2568.95	979.778	2257.97			404.194	1	386.195	1419.23			592.862	1893.34	1704.44
A0A075B6H7	Probable non-functional immunoglobulin kappa variable 3-7	IGKV3-7	1	0	202537	45790.4	12948.9	64394.7	99108.5	27942.2	88465.9	32232	37434	337572	305082	95502.6	27832.4	75617.7	30907.4	112137	17739.9	12634.7	26861.8	10764.9	209775	228136	30442.4	73139.3	83037	45840.1	47075.5	17580.8	44583.5	36106.6	100961	51150.7	49739.5	33094.7	112842	76713.3	29134.5	16366.3	40244.6	80295.7	161733	114883	68106.4	48540.8	45834.8
A0A075B6R9	Probable non-functional immunoglobulin kappa variable 2D-24	IGKV2D-24	1	0	11721	1169.57	86.0851	1832.49	2821.74			1	596.24	1625.32		2528.93	803.193		561.035	3700.49		519.806	1367.32			89216.4		849.797	369.045							1193.94	237.113	621.538	1.75552			3337.05	958.659	1968.84	273.496		5144.8	2328.66	1688.25
A0A075B6S2	Immunoglobulin kappa variable 2D-29	IGKV2D-29	2	0	251.676											577.837	352.212	482.143						2637.94												2766.97	831.605										573.243
A0A0A0MRZ8	Immunoglobulin kappa variable 3D-11	IGKV3D-11	1	0	248117	51131.6	21095.4	87403.7	156960	33727.7	139724	59319.6	67224.1	251114	615346	141119	46819.5	72619.8	52056.4	212678	19882.5	6818.3	83430.5	38774	292834	521656	48775.8	113527	132834	159437	97854.4	33187.6	92605.3	88659.7	270310	116737	120383	89986.2	245492	143268	59290.4	49602.6	53564.1	139897	253542	263718	121290	107981	135111
A0A0A0MS15	Immunoglobulin heavy variable 3-49	IGHV3-49	1	1	27300.7	4184.4	553.453	8099.98	13631.7	927.136	11601.7	3622.76	3381.31	5013.27		7344.76	3003.83	5325.45	3426.75	28992.3	2615.42	15060.5				3074.24	517.016	8917.84	7064.14	8278.45	2360.44	675.851	1469.85	789.525	6241.47	2668.8	5137.49	3439.64			4426.44	5771.43	981.211	2663.02	10146.4	2985.61	8372.1	8325.12	5782.87
A0A0B4J1U7	Immunoglobulin heavy variable 6-1	IGHV6-1	1	1	50889.4	1778.68	1079.64	4271.11	10909.5	2614.83	8013.55	1117.09	3524.43	15342.3		8543.69	6409.84	8403.04	8355.54	29777.3	1464.39	13008.2	5634.92		2302.69		2294.95	44106.7	7734.49	8670.92	7700.05	2586.66		4838.39	3711.17	5782.14	3901.75	10819		2430.16	4591.51	1148.78	2176.02	3726.9	4616.78	7954.02	10138.5	5684.94
A0A0B4J1V0	Immunoglobulin heavy variable 3-15	IGHV3-15	1	0	39990.6	7144.11	2926.69	5974.02	27262.4	7379.48	29394.7	4065.99		12294.7		20690.7	4841.48	19824.1	8327.87	60285.5	2104.8		4167.71		3944.42	14042.3	1430.44	23226	9524.18	9892.29	6072.38	2599.81	759.747	2430.12	11395.7	5745.26	7760.51	7397.71	8486.9	2381.18	6296.84	185.277		11382.1	15387.8	11796.8	15751.4	14082.7	7911.64
A0A0B4J1X5	Immunoglobulin heavy variable 3-74	IGHV3-74	1	1	4994.56	294.365	302.742	814.807	3059.68		787.449	266.171				2078.06	692.845	914.758	199.057	9000.76								1082.63				1174.19
A0A0B4J1Y8	Immunoglobulin lambda variable 9-49	IGLV9-49	1	1												1288.18	331.059	716.754	336.674			1657.16
A0A0B4J2D5	Glutamine amidotransferase-like class 1 domain-containing protein 3B, mitochondrial	GATD3B	8	0	1119.36	3630.55	3612.98	2386.23	15046	1504.02	2986.64	3909.5	4701.06	7026.46	42.2874	2469.78	1799.81	2794.6	1342.67	1985.81	3311.26	5240.82	2136.04	4513.28	23269.8	37034.5	2824.32	2537.15	8139.78	4764.93	6688.97	6441.54	4727.55	6046.81	3454.81	4257.39	4876.37	2633.39	4806.31	3188.11	1789.01	4652.21	4820.35	1942.25	6676.45	5711.13	5338.31	12950.1	17080.7
A0A0C4DH25	Immunoglobulin kappa variable 3D-20	IGKV3D-20	1	1	38921.3	4827.32	2396.89	7652.14	20332	2034.57	15284.9	4080.62	7004.65	41544.7		42043.2	9166.14	10784.6	9053.69	24911.4	4235.87	1983.15	12568	3983.04	22175.8	40699.2	9775.57	16504	29501	13221.6	9148.16	4116.11	16122.8	9535.33	35588.7	12128.4	17302.2	9212.6	5975.33	8668.09	7201.4	6333.04	8757.85	14802.4	33074.7	9850.89	11562.6	12020.2	10091.2
A0A0C4DH43	Immunoglobulin heavy variable 2-70D	IGHV2-70D	1	1		873.918		1335.26	4113.43	1332.58		550.641	2132.01	464.494		3349.88	2980.32	1815.94		6053.53	988.043	3923.37						2999.74		1447.61		413.24					446.37	754.209			925.208				4179.84			1641.08
A0A0J9YX94	Paraneoplastic antigen Ma6F	PNMA6F	2	2					1925.3							24.8473													819.209			34.1222	106.736														173.754	1059.28	2259.61
A0A0J9YXY3	T cell receptor beta variable 6-2	TRBV6-2	1	0		92.7994	257.346	9.47226	1			1	594.356			92.3809	817.954	502.893	1		109.459	189.237	1									144.002		184.446		1	1	1			1		1			1.17681	475.484
A0A0U1RRL7	Protein MMP24OS	MMP24OS	2	2	3125.03	1662.4	6563.23	3626.16	8487.41	4065.77	1930.6	1394.56	27450.3	8749.47	2358.66	2105.56	3293.71	1717.53	5752.39	9436.43	2852.55	80395.4	22458.5	702.826	13745.8		7282.9	2978.18	9562.67	1249.53	1894.94	952.278	1749.71	4797.22	13196.1	650.552	3706.71	6322.51		515.563	1314.27	1135.42	1382.71	2998.89	902.633		1766.55	2680.22	17174.7
A0A140G945	Alpha-crystallin A2 chain	CRYAA2	2	0																						117697								1081.57			412.134		2866.34			418.35					1286.38
A0A1B0GUS4	Ubiquitin-conjugating enzyme E2 L5	UBE2L5	1	1	987.093	448.043	1175.54	1544.8	1611.42	1348.4	1507.88	941.909	4183.98			715.195	1440.26	1958.1	1226.93	1373.12	575.282	794.328	2298.69	573.931			4049.47	1153.2		1155.81		673.356	912.406	972.568		848.976	1053.12	3293.55			368.529	972.568	858.409		1563.43		832.551	1980.51	1751.72
A0AV96	RNA-binding protein 47	RBM47	2	2		438.964	231.931				154.074	576.146					385.65			187.612	161.637			1789.99			66.6403	295.606				203.935									125.148	1					49.1779
A0AVI2	Fer-1-like protein 5	FER1L5	1	1		1	60.5162	1	88.7638	589.955	53.9435	1	336.214				31.9863		1	41.0057	48.2919			1	1.05649	1.015	1	423.288		1210.22	1	156.427					1
A0AVK6	Transcription factor E2F8	E2F8	1	1		98.9214		271.121								163.807	1114.13	693.58			219.849		1591.61													1	93.9458
A0AVT1	Ubiquitin-like modifier-activating enzyme 6	UBA6	15	15	4495.51	2124.56	2048.53	2604.54	5091.39	5983.71	3306.65	2593.78	5808.65	4460.63	4807.48	2572.47	2901.02	1727.33	3436.27	2917.09	3502.11	2985.62	6888.59	2818.33	18390.9	2703.04	4033.39	4565.48	2790.49	12382	2696.05	2547.16	3778.59	2872.61	5556.94	2805.92	3159.98	3930.03	8038.76	4907.57	2526.44	1385.22	2897.78	2052.77	4476.47	4440.07	2560.58	2691.11	6530.85
A0FGR8	Extended synaptotagmin-2	ESYT2	5	5	2878.56	1914.56	4913.8	1638.88	2064.39		1413.29	4286.06		2535.44		1036.34	865.917	1590.3	352.162	2187.41	2006.77	1375.75	737.523	2414.33	6843.47	10512.9	3424.69	823.774	1405.49	4342.43	3028.29	3947.23	2969.12	3043.91		2204.84	1468.57	3260.34	2571.82	11093.2	7515.82	6442.72	4862.27	4897.45	3749.57	3807	4028.33	3343.97	2276.94
A0JLT2	Mediator of RNA polymerase II transcription subunit 19	MED19	1	1	8086.89	3348.71	2679.98	2595.99	3183.93		4167.41		2187.85			1055.27	4360.76	3086.99	5255.43	1666.23		231.811						3454.67			1793.26	2483.73			7540.38	1084.13	2106.5	877.2	1053.47		673.736	965.985	278.249	1652.87	1100.65		2551.54
A0M8Q6	Immunoglobulin lambda constant 7	IGLC7	1	1		334.25	339.435	184.066	161.887		273.444					121.618				48.8704	639.811								218.19			240.651					1							1	1		191.79	271.64
A0MZ66	Shootin-1	SHTN1	8	8	5101.42	2785.01	2100.11	2140.33	9198.13	4995	3367.01	1552.74	5886.41	8200.86		2569.78	1651.01	1002.65	2184.69	3211.78	4227.9	26216.9	4661.51	1858.58	4174.93	13815.9	3823.86	5876.65	3932.35	11679	289.108	1589.37	1975.87	4255.81	3420.11	884.383	4090.09	2084.61	1769.47	2027.32	1736.52	2039.2	187.181	1980.23	13464.7	8188.57	9480.18	12084.2	9835.29
A1L0T0	2-hydroxyacyl-CoA lyase 2	ILVBL	2	2	4643.99	1296.65	1501.43	2198.31	7227.58		2248.31	1981.9	4108.78	4255.73		1573.1	1311.72	2481.87	2340.64	2831.6	2210.13	5183.54	4983.51	1865.88		2583.95	2542.7	2517.54	4480.79		2462.52	2028.99	2102.98	3329.63			1726.81				1775.38	1646.94	1010.49	2788.75	1587.04		3269.2	4270.29	945.679
A1X283	SH3 and PX domain-containing protein 2B	SH3PXD2B	3	3		816.006	962.93	2366.78			2004.06	1388.56	1558.62			949.157		879.378	1661.86	2860.28	189.049	3866.75	669.665	2171.23			1666.38	794.579	333.945	1321.06				733.86				325.078									799.855
A2A288	Probable ribonuclease ZC3H12D	ZC3H12D	9	9	3082.88	1508.15	4310.14	6469.52		4337.27	2058.46	1419.22	2098.48	1		968.864	1883.78	2070.39	4503.54	917.193	1344.68	4234.23	3007.97	623.899			3568.26	2092.75	375.675		1577.15	894.355	692.787	1851.76		1006.32	288.545	1814.62	2.75759	1554.23	406.068	175.208	1046.69	1	1.38765	3.85737	1107.32
A2A3N6	Putative PIP5K1A and PSMD4-like protein	PIPSL	1	0		405.466	228.635	1747.89					1598.46			139.402	772.211	84.569	531.674	397.737	1040.11	905.683										1057.61					331.015				368.833		652.221		1		1114.36	235.285
A2RRP1	Neuroblastoma-amplified sequence	NBAS	8	8	1390.43	856.948	1846.22	1085.41	2395.24	1914.89	1523.85	811.793	1592.44	659.992		876.765	781.22	1620.82	1594.24	803	994.031	926.13	773.843	670.917		1507.42	1092.45		175.467	1627.39	526.855	974.31	469.791	1448.68		651.028	833.981	1681.12	1404.17	1113.05	2965.09	1452.8	1528.87	1564.57	1611.57	1531.85	1238.53	1043	1925.36
A2RTX5	Threonine--tRNA ligase 2, cytoplasmic	TARS3	4	3	1321.76	538.627	1474.32	639.989	1844.16	2081.57	366.402	125.119		2217.47		996.132			1838.91	2204.72		5599.71		34615.4				23083.2					43807.8				1018.38	1368.16									2267.07	3857.08
A2RUC4	tRNA wybutosine-synthesizing protein 5	TYW5	2	2	1924.86	848.146	845.35	828.597	2617.27	4071.28	1689.83	343.911		2638.76		2044.39	999.299		1755.91	2242.71	2242.55	2089.84	2173.37					1017.63			409.55	779.944	3562.09	650.499		949.578	2285.42	3623.23				481.376		1	973.184		2198.29	1816.06
A2VDJ0	Transmembrane protein 131-like	TMEM131L	2	2		635.922	620.2					1	367.39			224.006		160.241	244.209					1								248.572						1			901.545	441.14	852.787	1
A3KMH1	von Willebrand factor A domain-containing protein 8	VWA8	5	5	676.973		1892.74	549.554	230.991	235.147	631.745	740.17	1311.55			477.286	253.941	830.512	731.793	125.39	973.56	688.669	307.652	829.771			478.56	797.6				598.604				40.8546		55.5267			917.341	1442.77	1204.5	1			882.367		517.505
A3KN83	Protein strawberry notch homolog 1	SBNO1	9	6		566.879	1281.73	1823.07		1682.52	642.141	431.366	545.647			874.098		1208.11	1287.22	1390.42	958.956			633.057				210.586				430.336				531.003	549.451	780.139			835.153	60.0068	1301.26	1			564.72
A4D126	D-ribitol-5-phosphate cytidylyltransferase	CRPPA	2	2		1145.64		1604.4	150.734	157.987	1276.53	299.219				14.6052		1876.81		354.225	1061.05	1.18675		2331.45	1793.9	2259.46		1621.67	855.581			1051.74					732.41			4178.2	600.861	957.071			1703.55	1154	55.0078	187.505	1
A4D1E9	GTP-binding protein 10	GTPBP10	2	2		670.245	1571.95	689.265									758.499	140.451	585.983		805.889						66.5832																39.2168
A4D1P6	WD repeat-containing protein 91	WDR91	4	4	4909.81	2074.33	4324.91	3478.21	6058.03	3237.52	4329.33	2617.16	9951.45	3020.25		2437.27	1785.28	2996.97	3456.82	3627.77	1059.53	4090.87	3518.57	2888.24	2.90313	2517.53	8140.4	4708.19	3129.22	4606.02	2460.5	2608.15	5218.85	9809.52		1785.75	2241.73	3141.93		3995.12	3676.21	3203.11	2074.08	1355.12	2863.4		1981.91	2208.66
A4D2B0	Metallo-beta-lactamase domain-containing protein 1	MBLAC1	4	4	1765.67	431.796	641.117		7278.73	838.333	1005.22			523.432		1251.55	3732.21	170.607	700.182	1037.07	285.032	1536.59	3705.89					1158.02	6013.12			484.222				1465.91	1766.52	2918.65	2.0256								535.162	4695.45	4334.12
A4FU69	EF-hand calcium-binding domain-containing protein 5	EFCAB5	1	1			121.52	1	1																2.89568				367.085				1	346.321		1	318.267		873.523	4.19177	1	1	1			1.34666	228.055		2.83664
A5D8V6	Vacuolar protein sorting-associated protein 37C	VPS37C	2	2	6295.81	5828.19	6045.43	3926.87	21541.7	4966.52	2887.86	4906.56	17322.6	18965.2		3416.31	1431.02	3202.26	1501.26	3243.92	1	4918.29	16778.3	3913.53	18322.5	7664.64	11571.6	14508.6	6982.89	15116.3	6007.67	3649.9	2413.98	3339.33	7671.93	2966.61	4065.99	6040.14	5205.3	4637.47	5351.11	1383.39	3015.06	932.463	6742.58	8888.48	5469.47	10256	14638.4
A5PKW4	PH and SEC7 domain-containing protein 1	PSD	1	1			274.811		1266.62							99.4481																																1
A5YKK6	CCR4-NOT transcription complex subunit 1	CNOT1	21	21	2320.72	1824.14	1951.17	2890.29	1176.69	2363.63	1698.71	2309.49	3147.11	1289.3		1314.04	1987.18	4148.13	2620.31	2724.33	1863.5	1952.93	3335.24	2134.23		2892.62	3324.81	1904.62	1243.8	2729.55	3083.93	2365.64	2919.23	1814.2	461.343	1544.43	1464.29	2418.15	4461.32	3253.65	4331.44	2674.29	3470.73	1754.92	1733.35	775.075	1263.58	515.637	589.009
A5YM72	Carnosine synthase 1	CARNS1	6	6	1074.25	3644.73	1810.8	3975.49	4786.26		770.909	344.246	3017.27	26432.1		144.821	973.185		2904.31	3494.06	1930.44	18353.1		1699.3		23823.5	3511.17	2049.12	1281.83	3001.9	274.302	283.617					5457.52				853.961		663.97	2671.24	17599	7715.29	9004.44	10753.1	7135.92
A6NC98	Coiled-coil domain-containing protein 88B	CCDC88B	13	13	2805.99	1262.15	1880.5	808.738		1301.64	2181.88	584.744	1061.04			1010.01	584.289	1584.24	2369.77	1087.8	426.055	2215.76	3332.63	1556.67			3689.84	3359.49			835.616	510.194	698.664	465.927		716.688	395.051	636.819			2714.37	651.013	776.444	497.529			154.562
A6NCE7	Microtubule-associated proteins 1A/1B light chain 3 beta 2	MAP1LC3B2	1	0	1261.34	4091.43	2230.36	1681.01	13435.3	793.119	1296.25	1855.43	2567.81	28078.7		5118.56	1436.42	1396.13	2329.61	2901.96	2714.29	7848.14	1824.02	647.586	14281	14456.9	897.482	3604.38	31707.1	8113.72	5221.7	2994.16	2382.57	2331.64	28436.6	4725.64	19093.4	8201.3	5438.17	3.06641	1951.86	2135.34	5118.09	8908.32	22821.6	20306.1	13229.1	37567.6	72304.7
A6ND36	Protein FAM83G	FAM83G	1	1	30.3135		37.9365	12.4556	1	452.403	284.859			1		64.0512	141.602	39.098	42.9406	137.843	189.775	84.8161								222.69	90.0868	1		71.5428	945.417	1			1.53421		1		54.6814		1	1.83048	107.355	165.978
A6NDB9	Paralemmin-3	PALM3	2	2				1	14525.2							650.876						3329.15			4125.34			1069.95	1678.28								404.477											5360.02
A6NDG6	Glycerol-3-phosphate phosphatase	PGP	4	4	1726.68	272.795	1152.13	1091.28	3193.23	1017.73	1272.39	1		679.069	2470.08	872.376	1332.79	590.428	1605.99	1068.13	1663.66	2911.27	3851.25	322.032	1.56158		468.952	334.728	487.208		353.309	529.059	361.824	768.159	646.477	1695	1736.08	1538.83	3930.57	1102.32	434.783	955.205	216.398		691.782	1276.99	858.271	2574.84	4057.98
A6NDU8	UPF0600 protein C5orf51	C5orf51	2	2	1060.91	370.928	1670.08	1545.91	1177.52	3464.5	1696.72	441.954	3048.98	1		368.238	1215.6		1716.8	1337.78	1338.62	893.589	8141.09					2896.64					215.032			179.946			1384.13			45.9554						307.968
A6NED2	RCC1 domain-containing protein 1	RCCD1	3	3		136.5	916.56	96.7253		847.081	363.8			1.15517		124.062	561.045	35.0296	910.572	263.877	1077.24	2892.47	505.41					217.637			444.164	329.008	1495.97			310.414	203.497				92.7108	124.648	510.999				80.6374
A6NFQ2	TRPM8 channel-associated factor 2	TCAF2	4	4	3246.9	4179.88	2753.1	3499.36		3696.77	2158.05	3223.96	4125.56	1659.1		1651.21	2180.66		2627.01	2737.12	10434.2	5034.55	6554.55	1542.37			7313.1	3989.88			2797.99	1786.72		2432.7		211.704	1681.69	1987.44			960.368	2832.78	3415.16	1077.55			2769.29
A6NGU5	Putative glutathione hydrolase 3 proenzyme	GGT3P	4	0	10462.8	1238.52	5038.85	8864.75	2012.82	5497.6	3950.26	3819.92	11736.7	4224.12	19259.8	1922.92	2498.55	4739.97	1714.15	5164.98	1741.35	5955.34	15909.3	6843.03		5485.12	4493.83	8313.77	4896.35		3822.59	2185.07	17299.8	21474.9	10730.6	2221.13	1408.42	842.286	22943.8		2551.05	3065.77	2379.41	6181.2		6635.51	977.201	2630.58	2718.65
A6NHJ4	Zinc finger protein 860	ZNF860	1	1		492.854	260.167	207.835	1					3391.13			114.021	1	206.647	119.039	217.306		246.828				1	310.011									971.048					1	103.663				1057.23
A6NHR9	Structural maintenance of chromosomes flexible hinge domain-containing protein 1	SMCHD1	25	25	3025.65	2702.76	3552.64	2185.84	212988	5068.01	3118	2207.9	5297.06	121260	187317	2185.08	1922.87	2996.49	4160.38	3139.33	2086.42	15995	11188.8	4416.24	230876	55768.4	6252.63	2886.73	32400.6	13368	6734.38	2485.11	5643.82	4856.47	11430.5	1819.57	5080.27	6874.24	1758.03	1180.74	4661.39	4259.71	3062.71	2337.11	80432.2	1065.64	3967.94		51430.7
A6NI72	Putative neutrophil cytosol factor 1B	NCF1B	6	0	5098.32	5371.1	2605.2	5190.62	1786.9	1557.49	3258.15	2753.84	6768.39	8652.35	9684.25	589.65	10405	8768.91	3134.28	2937.48	8697.91	448.644	12083.1	7042.52		20717.7	5559.45	1613.95	3101.82	7620.46		7905.22	3150.67	8063	6248.37	1522.12	1445.96	1300.6	4054.78	17315.1	4309.57	5513.86	3402.02	3156.01	734.53		692.194
A6NIE6	Putative RRN3-like protein RRN3P2	RRN3P2	1	0	1243.95	695.104	743.393	2185.41		2645.69	965.042					2719.5	839.517	580.22	39.0344	1091.55	1003.63		3268.86									658.551	1365.72			374.387	421.92				625.099
A6NIH7	Protein unc-119 homolog B	UNC119B	4	3	1094.51	1263.44	4759.86	5736.27	1791.83	4165.26	2825.24	1089.44	1788.04	1127.31	7757.03	4548.78	5277.84	6059.66	4192.46	2263.84	2295.45	3570.6	1074.94		2099.17	1725.58	2198.43	1016.14	1015.64	496.899	1578.59	1542.05	1735.45		203.09	5309.87	2668.19	2757.94			1730.65	726.671	1286.92	1	1866.03		933.723	1935.51	1427.07
A6NJG2	Ankyrin repeat domain-containing protein SOWAHD	SOWAHD	2	2	1256.07	250.918	1309.51	457.262		5163.31	2113.01	182.646	2215.59			1744.23	674.942		794.464	1188.09	1640.42	3274.47	11928.6				2363.92	2410.07						888.257		431.609		579.093										1
A6NK58	Putative lipoyltransferase 2, mitochondrial	LIPT2	1	1		1146.96	2717.7	829.518										513.471			3059.85																532.375				472.78	448.922	1162.51				427.415	919.217
A6QL64	Ankyrin repeat domain-containing protein 36A	ANKRD36	1	0															1					1								389.568
A6XGL0	YjeF N-terminal domain-containing protein 3	YJEFN3	4	4	4048.94	2987.06	7447.8	2339.59	2807.92	3476.28		2549.73	16874.2	30.2872		280.99	2400.92	4878.62	259.292	1963.54	861.186	2926.06			2.89965		1661.93	7541.16	1		880.398	741.352	1803.86	1611.73		973.537	1935.9	972.228			770.697	977.274					374.415	919.883	1.66582
A6ZKI3	Retrotransposon Gag-like protein 8C	RTL8C	4	0	6808.82	4402.06	2903.33	5717.71	15053.6	11461.6	2061.89	2030.29	8580.64	25809.9		6453.55	1658.6	863.273	2064.88	3557.25	1516.27	12594.8	19816.7	3956.36	15379.2	17244.5	3300.62	5584.25	16905.9			978.778		363.993	9708.81	924.763	8308.58	7449.48			2630.37	575.583	792.084	2940	16164	5447.17	8935.58	17388.7	46195
A8K2U0	Alpha-2-macroglobulin-like protein 1	A2ML1	19	19	4323.42	4378.64	181.525	6488.03	1653.77		9638.23	406.52		3383.62	333327	1469.93		1484.79				1924.19		2604.34	3278.87	31287.3		55585.2	14667.5	2933.31			326.811	37941.3		2823.84	4407.96	3926.96	17975.2	20382.8	2776.11	4491.93	796.835	1580.88	7896.42	7704.44	1223.63	2686.3	2910.13
A8K855	EF-hand calcium-binding domain-containing protein 7	EFCAB7	1	1		3536.58	2695.5	3369.28	7481.88		4210.6	3239.46		1708		3526.6		4108.97	5807.77	2893.51	3530.16			1321.07			1894.71		3000.34	2990.96	5499.65	2866.52	2091.1			3620.08	4418.69	3575.79			2906.42	1124.17	5496.63				4076.11	4560.31	6286.82
A8MPP1	Putative ATP-dependent RNA helicase DDX11-like protein 8	DDX11L8	2	0		1391.66	779.341	1020.42			136.824	162.159				1030.34	1832.87	1855.95	3785.25	2009.18	734.436		609.237	1463.55			963.342				1038.26										1145.45	1040.3
A8MPS7	Carbohydrate deacetylase	YDJC	2	2	1475.52		2060.2	389.366	1467.99		696.03		922.337			331.748	785.771		214.93	277.461	981.004	383.16	1059				501.128	1257.45																				194.74
A8MSI8	LYR motif-containing protein 9	LYRM9	1	1				147.67	1473.44							504.836	362.712					930.055												1													163.595	471.107
A8MT69	Centromere protein X	CENPX	1	1	9873.91	4425.99	3637.7	5471.29		9154.27	4164.19	3064.83	2873.95		59903.8	5573.7	7784.88	6516.96	6150.96	3171.43	9508.75	6013.95	29382.5	4204.08	37359.3		6727.61		508.846	6736.11	3638.51	4260.98	8173.49	1178.52	6663.9		2982.17	11690.5		4440.24	4527.56	342.862	3556.85	2709.42	11850.5		768.854		9429.41
A8MU46	Smoothelin-like protein 1	SMTNL1	3	3	1237.99	4703.9	150.043	18.0689		161.665		143.57		604.267		919.838	116.789		1	1190.22			1	1		7372.51		1962.98		7708.23	1534.08	2970.55		744.273	828.016	234.724	1		1839.38	564.237				776.557	2149.13	2.61571	210.408		1.28552
A8MVW0	Protein FAM171A2	FAM171A2	6	5	469.486		1237.53		4539.52							541.485						4637.06	112.195		628.527			940.985	482.434			116.282	234.62									1					304.523	1194.38	1001.33
A8MWD9	Putative small nuclear ribonucleoprotein G-like protein 15	SNRPGP15	1	0	71391	53052.4	121985	59611.1	29427.5	127485	80725.3	147105	117934	38887.7	1.7946e+06	77563.9	80391.6	49439.7	38149.2	36605.4	58544.3	40840.7	97699.3	207368	70766.8	242672	129492	139233	315147	93481.7	179559	98638.8	318029	418521	790842	223895	180772	51991.9	224281	601421	77016.4	78269	224572	454852	204285	232047	75911.4	100115	193325
A8MXV4	Nucleoside diphosphate-linked moiety X motif 19	NUDT19	1	1	229.139	718.17	1855.98	1110.06		2387.22	705.208		179.524			1383.45	247.806	300.515	632.128	727.896	153.906																				237.091	230.351	1
A9UHW6	MIF4G domain-containing protein	MIF4GD	1	1	4776.3	1704.61	2647.18	2080.75		6324.42	2948.07	1865.26	2211.3	3973.74		3559.26	4797.32	2496.58	5038.93	5352.35	2436.45	2535.6	4422.32	2247.63			3641.37	2616.37	1403.24	2534.99	1795.69	3609.17	9097.17	10529.7	6024.87	7047.11	6213.15	9141.98	2064.52		4720.86	5893.39	2809.36	6074.12	5828.62	1501.49	4963.95	4481.28	5953.62
B0I1T2	Unconventional myosin-Ig	MYO1G	11	11	8864.13	3903.68	1146.24	3257.92		5236.7	5648.28	2668.8	1835.97	5608.2		1547.12	3576.67	3524.06	2173.58	2841.96	1417.94	6130.5	6264.54	5154.86	732.563	7930.23	3245.84	5029.44	825.289	1807.13	2002.1	1437.97	3791.12	5791.63	8579.57	3320.86	2768.56	2055.58	3443.88	19782.2	3893.98	1901.55	2055.93	2716.86	3225.15	6963.92	1360.16	829.254	348.083
B1ANS9	WD repeat-containing protein 64	WDR64	1	1	169.839	1.31506	116.722	1	198.187	1	1	1	205.783	2.89341		1		1	1	72.9667	92.5619	1		1.29303	4.22153	1.53529	138.859		1.9475		1.79668		1.25796	212.535			256.949	1	6.20631	3.13454	144.923	1	157.813	2.68539	1.7575		291.476	1	4.14522
B5MCN3	Putative SEC14-like protein 6	SEC14L6	1	1					2178.18		1					481.358				348.795		832.038						691.348				204.671					272.892										922.662	630.457
B5MCY1	Tudor domain-containing protein 15	TDRD15	2	2	1059.83	361.597	2098	1567.29	3891.95	1781.49	949.979	576.762	762.975		81577.5	380.066	700.983		34.5029		126.306	8909.36		16941.1	41810.9			25215.7			1388.07	455.831	32825.6	54664.9	21834.7	23362.3	17225	370.999	26049.7	4808.24	16169.7	8052.86	25511.6	12828.2	9926.56	11002	1286.27	24134.9	69176.4
B7ZBB8	Protein phosphatase 1 regulatory subunit 3G	PPP1R3G	1	1	1879.37	833.998	1151.93	2792.61	16478.3		4579.04	3001.3	5873.03	6562.84		2875.67	1433.69	1103.64	1618.31	6049.97	515.77	9917.72	1514.72					8841.91	7439.28				2166.6	3088.59	838.611	1689.82	3630.9	1897.45				347.141		1363.96				4199.81	4822.25
B7ZW38	Heterogeneous nuclear ribonucleoprotein C-like 3	HNRNPCL3	1	0	7191.03	72159.1	32901.7	28465.9	1435.86	11256.7		67628.5	13707.2	31142.2	122548	19287	29194.1	61046	38953.5	20196.6	46219.2	8082.24	18780.3	36138.1	11278.8	47985.4	36863.7	8267.11	13196.5		46061.2	41900.7		12881.4	11768.1	29008.4	16765.2	24816.6	33764.5	90588.4	82595.4	59526.6	110702		15042.2	40988.2	27148.2	13083.2	17340.9
B9A064	Immunoglobulin lambda-like polypeptide 5	IGLL5	1	0												3461.41				238.306		334.668					6624.19		1024.47			42198.2	3519.54			337.557					116.938	465.854				2136.85	913.29	2456.63	3481.09
C4AMC7	Putative WAS protein family homolog 3	WASH3P	6	0	1803.74	2021.91	1545.83	1053.63	3919.49	3529.76	1585.48	1668.91	3082.94	2699.64		1271.18	4348.33	1520.86	3504.55	1486.34	1855.52	1944.75	7264.59	1528.05	7501.55	2.25082	2532.02	4219.53			2911.73	500.172	1876.71	2507.92	2113.16	736.751	1525.81	650.572			2768.91	1339.93	993.315	3158.66			3805.17	4060.8	1
C9J798	Ras GTPase-activating protein 4B	RASA4B	5	0	27.0436	299.236	816.045	911.074		135.749	566.369	143.439		2.05301		468.34	2860.47	1725.18		745.369	1744.61		1845.65	318.582			1034.28					730.593		1776.37		536.75	445.803	1059.39			338.388	167.142	977.731				1111.74	367.665	190.047
C9JLW8	Mapk-regulated corepressor-interacting protein 1	MCRIP1	4	4	8658.48	4633.87	9755.06	9272.14	17829.3	19660	12441.4	4768.83	15498.2	23455.8	22.3027	15048.6	23396.5	16369	16106.9	13387.1	13472.3	133695	64115.4	7626.61	7251.59	6752.01	10952.8	7693.88	20588.1	6737.96	18201.5	12125.3	15135.3	12788	36442.7	16113.8	14499.5	24949.4	8901.11	6754.73	4795.2	3182.9	13469.8	9169.23	18474	7336.33	12897.3	23325.7	33912.7
E9PAV3	Nascent polypeptide-associated complex subunit alpha, muscle-specific form	NACA	5	0	28853.2	42138.4	26822.1	31102.7	16742.5	105847	27696.2	30494.6	35998.4	35653.8	333420	36246.3	29877	38227.8	52693.8	30735.3	60998	75376.6	69552.1	43695.7	28983.1	42578.2	30267.1	15018.4	64062.5	41124.8	74838.8	61853.8	202565	100271	100262	106872	53648.5	71234.2	94852.3	113911	30251.7	23751.5	96613.4	59398.4	35695	72968.9	25931.8	28319.6	83546.3
E9PB15	Putative protein PTGES3L	PTGES3L	1	1			1	1		425.434	390.863			1.14684		530.4		1		1	347.004			1			307.185		1			1						231.075				147.69		1		1.06357		1
E9PRG8	Uncharacterized protein C11orf98	C11orf98	1	1	4368.48	16024.9	13165.6	15227.7		26940.6	16927.5	15034.4	10364.7	4783.4	24704	12195.7	17688.1	26817.6	13599.5	8360.56	21060.2	2124.41	14158.3	20143.5	5550.42	4160.79	29077.2	10617	4908.88	12542.8	16237.6	9392.38	28605.1	15306.4	5155.53	14770.7	5194.29	7449.27	4053.58	16059.6	17963.5	13793.9	25822.7	13082.9	1846.98	7936.27	7236.97	2580.74	2557.68
G2XKQ0	Small ubiquitin-related modifier 5	SUMO1P1	2	0	45977.7	23183	39336.9	59790.5	11439.7	127469	51166	62385.8	75397	35906.1	399046	47433.4	49306.1	105394	44374.7	37283	38063.9	3206.64	221637	56566.8	41577.2	54045.6	53297.1	37958.3	29936.2	22253.6	29618.6	24609.6	50400	50714.9	52204.5	26605.5	27681.6	62471.1	86182.8	97342.1	32567.4	22757.5	45550.2	27898.2	16740.7	51656.4	11944.3	21228.9	56432.7
G9CGD6	CNK3/IPCEF1 fusion protein	CNK3/IPCEF1	2	0		360.04			5628.24	370.16		18.7861				1039.77		470.352	786.261			2184.9	1552.56						1		1125.81	1138.11		1248.61		391.146	1531.97	483.077			1470.89	53.0173					1602.46	1380.14	2521.65
L0R6Q1	SLC35A4 upstream open reading frame protein	SLC35A4	3	3	10772.1	4500.35	5444.15	3259.61	6485.65	6616.87	5137.75	4419.3	9079.24	6156.77	68751.1	4972.21	5384.91	5077.43	3129.94	5954.71	7400.06	8854.27	17654.4	7616.78	14999.7	18749.7	8534.41	7032.74	10486.6	10756.5	8273.61	3826.08	11021.4	8040.87	18876.5	3303.63	3697.73	3980.81	13143.2	8417.14	5628.24	4341.62	4984.61	5953.04	4759.36	8089.99	3358.53	4574.82	12552.1
L0R819	ASNSD1 upstream open reading frame protein	ASDURF	3	3	1	402.104	1458.6	487.654		734.753	451.195	403.089	2411.34	1323.1		1654.53	1023.42	457.027	1426.83	390.6	710.172		3650.19	868.569		971.165	2189.92	1909.24	1188.09	320.026	628.976	803.136	1756.78	1687.72	7949.36	2266.99	803.416	1573.96		1213.04	492.735	259.167	1353.79			1481.43	1822.16	1477.43	1472.41
L0R8F8	MIEF1 upstream open reading frame protein	MIEF1	1	1	8954.13	8635.05	21404.1	18773.3	2338.52	14405.9	10081.6	5326.01	6290.65	6260.56	13042.1	16808.3	9433.06	8796.79	14437.2	11823.4	23758.9	5812.33	39450.7	12256.7	1396.55	9882.1	11385.2	2609.64	19950.8	7355.68	12471	14318	45293.3	25650.8	19654	33145	12704.2	24159.1	6770.77	15135.5	8352.05	4216.59	22537.5	11844.5	4147.49	6186.62	7233.7	8100.22	21473.2
O00115	Deoxyribonuclease-2-alpha	DNASE2	3	3	112926	27107.2	66778.6	42686	13919.3	58169.5	121850	25564	633966	50216.2	178689	70943	57665.2	41657.9	93370.1	123929	76513.8	74606.8	434441	46446	51734.6	52570.5	253238	123047	86310.1	47034.7	61969.6	60706.1	217492	301588	1.08086e+06	113479	71026.1	271880	172036	90800.2	23703.2	20610	50491.1	122539	75454.4	112697	17004.2	22394.4	98075.9
O00116	Alkyldihydroxyacetonephosphate synthase, peroxisomal	AGPS	4	4	4134.58	2522.19	1670.4	2119.07		1810.61	3048.47	2053.58	3203.95	4356		1055.82	1157.5	2755.96	1599.03	2009.9	1031.92	5006.33	2039.15	2646.82		41856	3071.88	1296.06	3748.68	2606.34	2293.74	1847.62	3744.12	2792.74	6101.27	1459.03	8908.95	3009.76	13631.9	10478.7	2551.45	2375.14	4285.61	15097.8	16433.8	22777.3	4255.16
O00139	Kinesin-like protein KIF2A	KIF2A	8	8	7901.91	10818	8723.63	6765.37	18640.9	11086.6	3483.91	8256.67	9558.4	18488	69627.5	4086.63	5746.24	10412.8	6534.2	4075.37	6314.31	6018.58	9310.44	10490.8	37338.1	30456.7	7964	6795.2	9319.76	7406.08	6320.81	8319.18	3363.88	3112.1	9668.52	4484.32	5267.84	5525.44	3920.44	12824.6	8391.88	5119.66	12207.9	7716.02	12324.7	20077.9	8380.84	11562.8	13493.4
O00142	Thymidine kinase 2, mitochondrial	TK2	1	1	4146.32	3975.05	2059.27	2985.97	9787.95		2696.36	3496.22	1452	18527.8	18035.1	3381.57	1909.21		725.151	1056.11	998.753	6249.51		4141.1	16253.4	7094.1	7016.88	3415.57	3823.18			1432.27	2000.02	4328.38			1259.34	1738.49	517.342		2391.89	5371.05	853.178	3371.18	1231.95		5078.43	6474.45	1144.03
O00148	ATP-dependent RNA helicase DDX39A	DDX39A	13	6	32965.6	15039.5	23089.9	25019.2	13022.8	37980.5	13761	28984.7	34377	26204.7	509993	13159.3	23332.6	43675.5	18341.1	17416.4	18151.8	10706.4	30943.3	28379.4	38863.6	41400.5	33890	26224.2	21590.6	32492.5	30645	15893.3	26884.2	21561.9	34280.5	21941.7	11009.6	22836	46615.5	70236.6	32944.5	22006.4	29932.8	29609.5	16841.8	38141.8	12132.8	9576.59	35652.8
O00151	PDZ and LIM domain protein 1	PDLIM1	11	11	16355	7882.03	10080.7	14422.4	5269.76	24046.7	13853.4	24370.1	47269	11452	94435.2	9392.62	4486.4	6581.14	3507.98	17271.7	18548.6	10457	27575.5	13642.2	112814	12242.3	8698.64	13558.5	11203.4	8375.32	14155.2	4854.92	25449	10238.6	28111.6	6112.16	6368.46	15784.9	47040.5	33018	9945.97	4808.53	20923.6	17557.4	4900.05	37269.1	4633.59	2637.31	35399.9
O00154	Cytosolic acyl coenzyme A thioester hydrolase	ACOT7	10	10	9723.76	11138	18414	19594.6	42765.4	46374.8	21277.6	16375.5	17540.1	43662.9	87535.2	9572.81	6789.66	16640.7	6632.55	23164.5	7211.48	61960.1	18111	4551.51	54451.1	56657.6	5979.4	51141.8	116250	46110.1	9897.67	26651.1	16731.3	14177.5	14399.9	42081.6	25494.1	16654.6	14055.3	5849.88	4194.64	8013.54	7135.92	7927.26	59487.4	24126.7	22193	30731.5	27993.8
O00159	Unconventional myosin-Ic	MYO1C	12	12	5213.21	1634.83	5968.87	1067.96	5599.09	4984.24	3383.53	5222.98	11621.6	4630.4	1679.83	2553.82	2478.79	4504.33	1647.95	1900.3	2621.44	3302.71	9412.81	3393.61	6724.71	28574.2	4149.94	3548.47	1742.15	1928.45	2343.4	2999.33	5013.67	3727.69	2246.28	2340.88	1480.82	2699.61	4188.31	12339.6	4320.82	2118.87	1745.86	1921.32	3130.52	1686.4	1440.16	2237.8	921.634
O00160	Unconventional myosin-If	MYO1F	10	10	4114	1879.48	362.148	1819.31	581.677	3282.52	2610.43	3869.46	1024.57	3417.34		1397	723.205	1640.63	1106.58	2005.14	457.534	2945.53	661.024	2852.64		1967.51	1993.38	1794.9	1240.33	10161.8	248.997	835.534	1983.26	3081	3983.72	1565.53	1820.23	2824.95	1500.74	954.078	1871.99	2156.96	797.641	4793.76	5795.67	13598.3	1564.31	670.078
O00161	Synaptosomal-associated protein 23	SNAP23	8	8	22614	15128.6	19415.9	11619.6	26177.3	26879.7	13266.4	11435.5	44018.5	30460.2	349928	6396.61	17466.4	24181.7	16626	13121.1	12500.3	36797.7	55859.4	24057.9	45814.1	105884	24790.3	26301.9	15458.9	24198.3	15829.5	16957.3	32556.6	33239	49252.7	22013.4	12625.1	27300.9	60124.3	37968.4	16349.8	11676.1	20878.8	22663.4	14268.6	26130.9	9239.68	14275.1	50687.7
O00165	HCLS1-associated protein X-1	HAX1	7	7	5639.7	2399.8	4818.63	2532.55	5526.75	6318.39	1851.67	2591.03	5232.81	25968.5	113506	3416.27	3090.79	3014.68	3334.46	2817.1	3599.76	1312.89	13144.3	1913.42	9720.03	123213	3648.01	1875.35	2658.32	703.728	1444.05	1490.1	1895.47	921.086	3430.49	989.314	842.655	1302.46	76535.6	100889	1425	3224.71	2049.52	1020.26	34071.1		1033.43	2824.03	4294.83
O00170	AH receptor-interacting protein	AIP	6	6	9820.78	12352	18185.7	9565.57	12660.2	32104.3	12310.9	7727.3	27335.8	10895.9		5957.47	17357	15283.2	17099.2	9031.07	14019.2	11771.4	37781.3	18855.3	16264.3	20439.6	18421.5	16248.4	13422.7	22018.9	10582.6	12379.7	20431.4	26171.9	21683.6	13826.3	11565.6	27329.3	26077.6	41570.1	12375.6	10526.2	18967.1	12031	9521.06	25782.6	8933.73	7435.61	19357.9
O00178	GTP-binding protein 1	GTPBP1	6	6	2366.44	2174.25	1747.95	2058.04	999.957	3367.86	2043.93	1376.5	1195.51	227.948		874.334	3051.2	2443.69	2349.37	1673.27	1938.86	2780	4125.24	524.987		1.44259	1518.95	1306.59	633.978	403.173	154.509	2152.47	1988.03	3443.59		2953.94	2355.13	1463.11			2094.03	1660.54	3264.65	535.02			2286.33	593.961	1522.85
O00182	Galectin-9	LGALS9	5	3	4238.77	2788.27	9148.55	6002.63		1537.81	4616.59	968.858	24578.5			1648.23	3373.67	1929.99	5198.5	6887.12	2840.06	5124.41	2652.53	890.385			10103.3	2849.43	444.869	6045.75		1072.47	1439.42	4816.38	20488.9	1148.22	919.976	1396.47	1253.66		2981.92	2620.39	499.321	3897.78	1399.01		735.725	825.742
O00186	Syntaxin-binding protein 3	STXBP3	5	5	2071.57	3204.32	423.396	1947.67	2638.61	2725.72	1123.42	5473.29	1723.35	4697.41		1097.11	1784.79	2145.24	809.809	578.455	690.794	8203.66	849.831	6658.93	136357	44849.9	3433.98	2544.22	11500.7	5431.14	3046.72	1754.94	8913.72	3945.54	31202.1	1171.53	1739.81	3176.28	38779.4	2607.04	2918.61	5493.32	882.629	15093	4765.02	1529.07	3111.77	1638.81	1559.59
O00192	Armadillo repeat protein deleted in velo-cardio-facial syndrome	ARVCF	3	3		128.485	505.291		4527.64							940.084	48.2631	327.814			239.537	1433.54		237.656	1.78926			1148.81														304.268					127.971	272.443	600.526
O00193	Small acidic protein	SMAP	5	5	1567.55	267.835	1664.51	690.058		1336.37	242.539	48.5801	426.898	1.35714		800.924	468.332	181.325	877.153	2781.61	995.265	7230.24	1962.9				138.623	473.008	1156.39		831.629	1200.18	2216.64	2992.16	3278.14	1027.36	513.652	1008.4	1.18614		380.436	52.4797	333.978	744.966	1	612.3	223.911	322.361	6951.89
O00194	Ras-related protein Rab-27B	RAB27B	5	3	38765.8	11874.2	8355.85	5517.69	31295.2	19799.2	7434.45	9473.09	6227.39	11508	15386.1	4477.18	11819.1	12080.6	7470.8	5105.17	3143.27	7686.6	10347.2	16002.3	22567.3	8672.88	13646	9390.88	15460.8	11970.4	8351.23	6120.23	17037.6	26732.3	14721.1	10217.7	4459.55	8386.65	14327.6	18496.9	6351.76	5661.97	7243.29	15497.4	3285.54	3596.04	3850.31	22375.8	46223.1
O00203	AP-3 complex subunit beta-1	AP3B1	11	11	3039.86	1516.94	2407.32	2042.67	2820.86	2728.4	2379.2	2459.43	2369.09	3884.25	6490.53	1499.27	1214.9	1653.08	2499.64	1900.52	1694.81	3924.74	5561.36	1037.78		5605.94	3294.37	2284.38	999.426	3386.12	2506.44	2177.71	7925.07	4126.27	6863.88	1669.96	3540.53	2531.12	1.45477	1398.21	3126.36	2673.2	3000.07	1901.57	2140.03	1313.89	2569.31	559.563
O00213	Amyloid-beta A4 precursor protein-binding family B member 1	APBB1	2	2					2722.57							231.864			490.467			439.661	605.979						1					431.83			442.593	441.763			1		1				363.673	730.597	1273.09
O00214	Galectin-8	LGALS8	3	3	1449.6	674.539	259.164	639.129	1456.79	1709.99	661.237	815.857	1	942.8		1068.3	348.325	588.445	1065.2	1534.14	317.339	1159.54	384.897	375.997			281.469	191.054	821.053	221.842		594.481		1584.34		112.273	2629.78	341.28			815.386	388.148		483.999	378.697		730.366	1251.09
O00217	NADH dehydrogenase [ubiquinone] iron-sulfur protein 8, mitochondrial	NDUFS8	3	3	32439.9	15326.8	16032	9170.82	63198.9	4741.09	6954.91	13536.1	40550.1	40820.4	152091	13432.9	12389.8	9151.42	11252.3	9224.1	9908.76	17189.3	12111.1	15608.2	68623.8	22665.4	15184.8	21371.8	5971.06	4714.67	4102.18	6115.64	3299.25	6930.3	8444.51	5475.16	7562.37	8923.3	4557.42	24644	5720.21	4454.42	6578.52	11290.3	13728	16487.2	15896.3	35687.3	74717.7
O00221	NF-kappa-B inhibitor epsilon	NFKBIE	5	5	1698.02	806.986	709.185	278.776		1932.62	559.629	304.886	5673.81			830.37	3644.76	1835.97	1712.31	1494.18	2004.04	22336.3	3439.16	1761.59			2228.95	254.847				428.264		1074.68		458.419	392.107	494.698			764.819	327.77					268.207
O00231	26S proteasome non-ATPase regulatory subunit 11	PSMD11	14	14	7327.37	3357.15	3040.95	5276.58	6776.79	7759.63	3643.74	3864.26	3939.69	5077.55	16743.1	2298.31	4433.54	4236.89	4764.19	3970.73	4731.69	4369.41	13395.9	3779.02	7360.09	7428.42	3437.4	4106.92	4858.36	8219.91	3976.9	2950.83	6254.98	5472.04	9576.07	3710.62	3111.85	4205.58	4941.49	5939.57	2619.11	3452.37	4209.12	2742.82	3256.77	3879.03	2155.59	2210.59	2698.93
O00232	26S proteasome non-ATPase regulatory subunit 12	PSMD12	9	9	3879.6	2118.63	1367.8	4000.5	1988.84	2241.52	3281.71	2652.46	1796.99	1635.42	17402.4	1628.55	2641.54	3274.45	3165.73	2445.54	2917.76	6029.83	1649.59	715.416	653.255		1153.29	1269.36	2974.79	5781.73	3309.82	2489.51	3032.49	3789.9	5232.73	3123.59	3007.73	3895.91	2888.79	8192.07	3072.85	2983.61	4217.3	2737.2	3757.94	23297.7	2643.6	1781.47	1731.19
O00233	26S proteasome non-ATPase regulatory subunit 9	PSMD9	7	7	5994.69	6099.45	7618.8	7186.79	6917.88	8143.95	9291.46	3996.47	28108	17471.1	2236.63	8471.6	8755.63	4654.98	16275.7	8172	8918.43	1407.43	9165.33	8508.93	6316.63	10916.1	19898.6	11744.2	7411	23220.9	5727.49	5973.47	4765.66	5718.93	13554.5	3594.31	5074.5	10792	3470.95	16797.3	2777.77	3499.04	4446.02	7674.31	3851.21	1952.97	4031.27	5785.2	12715.8
O00241	Signal-regulatory protein beta-1	SIRPB1	2	2	2633.31				1145.41													31303.9
O00244	Copper transport protein ATOX1	ATOX1	2	2	27494.4	6843.97	28819.3	10473.9	39940	19673.9	17101.3	25420.1	87060.4	63760.9	10131	10840.5	13842.5	10610.3	11224.2	12732.3	7888.89	33292.6	62234.6	50723.4	41262.6	4670.99	41039.5	82177.6	40423		17238.6	12785.2	45972	54741.9	145182	36201.4	25599.5	36210.8	85523.1	22819.1	14463.9	16866.7	5016.24	16863.2	31721.9	24477.7	8641.48	19872.3	233890
O00255	Menin	MEN1	1	1	6508.15	2000.71	4285.97	3010.91		5790.54	2901.42	1129.43	1723.92			1931.64	4256.33	9752.83	2762.54	3418.97	1940.69		2870.23	2483.96			5970.7	2361.31			1873.72	2046.41		394.194		1519.03	571.444	662.1		3795.96	7610.09	1844.12	2644.82				1310.45
O00264	Membrane-associated progesterone receptor component 1	PGRMC1	4	4	45567.8	23119.8	22567.7	25339.5	85777.2	29294.9	33073.7	31056.4	108672	187533	1279090	37517.7	31986.6	32200.3	29463.5	39662.5	13974.8	46907	60803.3	28727.1	192956	267456	50317.3	33147	85095.3	61608	110714	19256.7	77212.7	25285.4	162141	20837.6	33306	60508.3	204994	75189.6	47776.8	22953.1	38349.5	94986.7	144130	196178	32394	80407.7	199092
O00267	Transcription elongation factor SPT5	SUPT5H	9	9	1656.3	1555.23	2554.25	1603.01	196.998	4882.17	974.027	2293.83	1434.39		6577.43	1512.73	2568.67	3114.92	1823.83	1867.52	2901.13	1235.65	3224.98	1834.91	956.015		3248.43	1182.62	607.21	5249.57	2663.45	2990.92	3072.16	1240.29	5701.37	2730.67	2041.62	2223.84	6451.45	8401.42	6815.7	6005.63	7164.13	1636.23	303.281	2463.42	1530.53	558.194	2087.46
O00268	Transcription initiation factor TFIID subunit 4	TAF4	3	3	407.791	275.869	223.626	587.855	4982.99			241.636				255.046	303.598			389.663			823.5	80.4828			1335.19	351.128			128.298	110.029					31.2602				649.258	101.162	605.429				1020.12	1456.43
O00273	DNA fragmentation factor subunit alpha	DFFA	7	7	2944.16	1944.65	2970.9	2490.54	3681.09	6341.51	3353.62	2959.84	4662.98	3602.18	48725.8	3921.62	3946.73	1098.78	3320.98	3166.21	5068.75	3705.45	11134.9	2487.3		1557.45	3958.98	4859.67	1780.96	707.422	6936.01	1951.78	7120.4	5133.7	3596.89	5291.53	2417.83	3696.97	236.116		2223.63	1479.55	1253.15	2602.61	2410.3	1.152	2205.23	4457.52
O00287	Regulatory factor X-associated protein	RFXAP	1	1	5671.39	818.748	3208.95	1753.13		6845.53	1662.92	2202.83	1371.9			2160.41	3826.61	2497.46	4292.08	3445.05	5057.54	1671.22	10765.3	1979.63			5290.87	1112.99			2394.18	818.334		2022.32		2024.7		1277.93		1495.01	2173.3	2785.63	4693.8				1523.08	1130.21	1667.43
O00291	Huntingtin-interacting protein 1	HIP1	8	8		325.172	138.577	367.924	440.391	317.319	501.582	1	882.472	2178.63		417.649	860.562	154.092	391.594	515.672	20.7269	774.213						290.566	232.586		3494.28	993.821	618.744			567.417	177.789	188.781			372.95	1			1412.68	2896.62	1552.73	1228.51
O00299	Chloride intracellular channel protein 1	CLIC1	14	14	62091.5	31272.5	36652.9	37275	25524.5	69213.3	90935.8	25067.4	70645.8	75946.5	324276	38262	60119.5	62555.1	61605.7	78013.2	67838.6	73018	103858	66873.2	51639.1	53295.7	85196.3	100941	38824.8	71064.2	41651.7	41207.4	64512.6	80840.4	132586	74537.8	34127.8	61981.7	71147.5	50194.6	17873.1	22571.7	26152.1	48976	41308.7	45702.7	14115.7	10978.8	33803.8
O00303	Eukaryotic translation initiation factor 3 subunit F	EIF3F	8	8	24095.7	15165.9	20501.5	18536.6	9071.93	25037	18440.2	10720.2	22124.5	14828.6	136515	19184.5	13107.9	22353.2	27871	9926.02	24645.5	16639.2	52122.3	18677.1	32754.5	18634.9	22751.5	18829	9562.06	18404.6	10724.3	12497	17923.5	12848.8	25213.8	14845.5	9373.05	16638.9	24916.4	30575.6	9854.03	7265.68	13898.7	11558.5	9264.57	8782.26	5807.28	7716.21	8512.01
O00329	Phosphatidylinositol 4,5-bisphosphate 3-kinase catalytic subunit delta isoform	PIK3CD	4	4	9768.46	4627.58	3979.55	7122.05	2850.14	16060.6	7439.62	3565.7	7630.25	6718.22		4183.75	8550.47	5736.38	6937.15	7716.62	4566.49	13577.3	10457.5	6363.64		6138.09	5234.06	9271.01	4096.9	6062.2	4845.12	3142.48	8848.32	10939.9	7940.58	2561.68	4012.81	5116.04	6264.9	4267.2	4029.72	3178.48	4865.35	7366.46	3738.79	6469.98	2653.11	1514.9
O00330	Pyruvate dehydrogenase protein X component, mitochondrial	PDHX	5	5	6203	1751.86	2989.11	1715.73	11540.8	174.074	584.647	878.353	1274.47	6107.16	10848.3	2855.43	3640.26	5616.64	4284.89	3283.78	2580.22	5013.63	1230.43	2075.64	10171	822.72	1463.76	2547.4	9102.33	4838.6		1135.99	1	309.004		74.6569	7712.35	7164.84			1855.46	1436.29	3035.35	1797.61	766.782	1284.25	3918.44	11536.3	26851.3
O00338	Sulfotransferase 1C2	SULT1C2	1	1				322.824									694.876	3685.01	178.878	504.056																1465.43
O00399	Dynactin subunit 6	DCTN6	2	2		1084.19	1975.44	1234.95	3712.99	474.727	1377.25	1	1134.92	2.4601	11619.9	2319.82	262.362	511.866	1094.27	2084.98	997.634	3344.58	2658.79	1529.53	2.81877	4902.71	989.353	2157.49	1739.9	4683.18	1113.77	905.942	1376.14	2553.05	7872.05	961.582	2607.22	2054.48			1098.03	1003.14		3651.17	2539.33	9509.95	2473.75	5307.03	7019.79
O00401	Neural Wiskott-Aldrich syndrome protein	WASL	4	4	4637.52	3028.48	3403.25	2240.45	91850.1	14011	3331.91	1880.21	9987.43	35303.8	67107.6	4339.09	2555.1	5836.19	4179.55	6392.74	3868.12	11290.4	23643.5	7917.82	139391	5709.91	4786.34	41340.8	81940.8		1109.42	15513.3	1941.05	2911.55	6413.54	3030.8	9186.66	2946.54	5873.52		1378.97	1953.78	11890.3	4054.85	7234.69	5550.33	10331.7	10583.3	25752.9
O00408	cGMP-dependent 3',5'-cyclic phosphodiesterase	PDE2A	9	9		260.33	454.898	153.359	10422.5				1			777.54	502.965	1	1	303.836	1	1520.77	131.091	5.45877	16386.9			868.082	1943.61		589.209	526.176	279.624	1		1	637.928	764.983			55.4582	1	1	278.537		320.716	1028.89	3138	3197.69
O00410	Importin-5	IPO5	18	17	6784.15	6353.11	11308.8	7549.92	13613.6	22795.2	8901.62	7399.19	15197.2	8793.35	41968	8703.97	10805.6	8701.25	11812.4	5977.16	11631	6304.83	15435.4	9098.1	13252.5	5469.86	11379.1	7789.04	6190.2	14107.7	7077.95	6573.3	12335.8	6258.96	8378.02	9202.64	6577.69	8624.23	10235.8	7723.46	5330.83	7236.24	8725.17	4226.24	6871.78	6761.65	5062.84	6261.17	4413.8
O00411	DNA-directed RNA polymerase, mitochondrial	POLRMT	3	3	665.038		1083.97	2613.42		183.505		1114.03	479.09			1333.67	227.928	1151.27	990.563	188.169	361.061						1628.94					2327.56				374.657					479.215	1050.14					567.93
O00418	Eukaryotic elongation factor 2 kinase	EEF2K	1	1			348.84		15481.5							1196.16	922.084		844.691
O00422	Histone deacetylase complex subunit SAP18	SAP18	4	4	12568.7	18446.9	21859.9	19751.8	6841.65	20257.5	16506.9	17333.3	22070.3	8194.98	181462	20756.7	20607.5	30327.4	20671.6	14297.4	26891.3	1330.64	44845.1	37598.8	29830.1	23159.7	36040.4	24512.3	17222.7	26145.8	44826.7	20661.1	19843.2	13667.9	31404.9	27721.4	12901.2	17959.2	18029.5	35457.8	33893.7	24952.8	34457.7	15171	4433.15	14860.7	13223.2	14218.9	25852.7
O00423	Echinoderm microtubule-associated protein-like 1	EML1	2	2				949.707	1722.91		385.727							308.665				1949.26								1889.08												354.547					1327.11	1555.03
O00425	Insulin-like growth factor 2 mRNA-binding protein 3	IGF2BP3	5	5	510.863	5064.89	5433.88	3093.22	410.413	1461.21	3333.69	2414.89	5270.75			1179.13	5000.98	2432.9	2826.23	309.345	3049.41	809.057	3468.92	3090.31			6930.26	635.215			903.723	3117.1	327.151			2904.89	1178.82	2016.85		911.146	2331.8	4281.55	576.403	1	1		2236.72	1025.47	443.95
O00429	Dynamin-1-like protein	DNM1L	21	21	23213.3	11002.2	11908.5	8268.19	41557.4	13825.5	7827.1	5845.4	14079.5	31743.4	121696	9064.73	5954.32	13526.2	11057.1	10303.7	8146.25	14703.9	13909.6	15110.2	79337	23146.8	19944.3	16743.7	23293.1	13459.7	7296.78	5765.51	6606.14	8433.45	12810.9	6483.8	6663.11	8601.99	17607.8	12522.9	5553.57	9387.32	7726.23	10031.3	14137.1	16628.2	7947.38	17464.2	33416.3
O00442	RNA 3'-terminal phosphate cyclase	RTCA	4	4	21356.4	5816.17	8457.09	8947.59	19568.7	16750	8548.24	4765.65	4162.43	9924.44		9087.94	6802.35	7557.57	11067.6	7902.61	8256.87	13893.5	7239.58	6610.5	10906.7	4776.54	8736.14	4848.88	10440.8	14117.9	5170.71	6288.63	8026.93	11192.6	6694.39	6559.39	7469.46	8791.63	3405.89	2972.1	6817.04	5623.21	10050.3	6075.72	8388.56	4187.79	8339.57	19667.2	11249.1
O00445	Synaptotagmin-5	SYT5	1	1					1842.97							153.012						5483.98			5897.65			631.006
O00459	Phosphatidylinositol 3-kinase regulatory subunit beta	PIK3R2	2	2	960.984	608.856	1	3379.33	1892.42		1178.61	1	2393.65			1624.18	729.236	81.0252	3578.73	1324.64	3805.81	3547.44	5054.12				836.251							884.763		594.753	647.067	1			1		972.595				1277.05	1162.21
O00461	Golgi integral membrane protein 4	GOLIM4	3	3	3476.15	535.174	3346.14	1350.17	288.116	2598.43	1303.78	1162.58	3635.01	976.929		1706.24	2006.51	1397.81	1426.91	1267.43	1078.54	5429.98	3547.4	1542.83		1505.4	1309.71	2451.07			1102.79	648.687	4234.84	478.047		266.121		387.8			496.72	196.346	635.868				576.008	165.928
O00462	Beta-mannosidase	MANBA	1	1		350.573	255.432	895.971		415.145	2384.62	1340.3	605.731			1477.73	1502.11	298.073	1046.71	1172.95				1				1560.06						445.559		971.756
O00463	TNF receptor-associated factor 5	TRAF5	3	3	745.77	1114.7	3998.03	7492.22	1075.47	15133.8	6541.07	1067.27	8718.16			5049.63	4253.28	3195.52	1874.26	4634.16	301.739	2607.04	3358.16	1790.19			7870.14		34922.8	15519.2	40126.2	4927.88	58065	34553.6	10873.5	14135	9431.76	15679.8	6173.01	1245.17	3048.68	7313.85	5790.4	16338.8	7544.95		4973.99	2223.9
O00468	Agrin	AGRN	11	11	4218.87	1788.86	5828.53	1450.77	4809.33	3446.94	3647.36	5135.18	10920	8655.44	12957.8	3896.47	3432.66	6137.9	1544.33	3638.3	1347.75	6645.04	7855.13	3324.87	16766.8	16040.2	3019.15	7883.43	7637.02	2562.47	2334.34	1648.24	1325.12	1798.99	4831.07	1067.41	755.439	931.554	17622	4004.61	2442.42	3069.43	2676.91		3667.39	2094.63	2757.49	3091.42	3482.17
O00469	Procollagen-lysine,2-oxoglutarate 5-dioxygenase 2	PLOD2	6	6	4495.36	604.723	437.674	3318.43	1497.68	770.905	477.303	2094.05	8588.67		4350.95	1101.67	4972.41	1924.37	1724.75	2815.08	1504.8	125.943		997.029			649.315	1697.32				2189.86	1143.05			2390.59		672.463			162.788	447.59	471.34		1142.71		484.543
O00478	Butyrophilin subfamily 3 member A3	BTN3A3	3	1	13816.7	9177.3	5142.14	3963.38	15664.3	1475.69	6036.9	11126.1	9918.44	83017.3	7062.01	3888.3	3565.42	4109.82	5196.38	7017.58	7209.44	19522.4	2691.46	20535.4	89763.7	23005.7	19688.2	27116.3	27851.8		985.477	5435.2	10142.5	18722.8	10781.9	1976.91	4018.42	10829	13442.4		3695.68	8150.8	1179.53	19643.8	15170.8	13431.2	10456.3	14576.5	13957.2
O00483	Cytochrome c oxidase subunit NDUFA4	NDUFA4	2	2	20309.7	25908.4	19922.7	11468	176702	2781.17	13067.4	20799.2	42953.5	49560.5	1.0003e+06	28143.4	12522.4	18099.8	11958.5	10965.9	15555.1	37874.2	3464.19	20075.5	236430	154646	14679.1	25904.1	48198.5	10493.6	18835.2	14165.7	28750	10142.5	30639.1	15293.7	25202.6	15109.1	54904.5	57205.3	14719.4	21174.6	20063	16480.4	54256.9	125770	33351.2	120380	251522
O00487	26S proteasome non-ATPase regulatory subunit 14	PSMD14	3	3	23378.9	10458.5	9033.25	14517.9	16727.9	17512.7	13624.6	14443.1	8720.3	9219.87	19597.8	7734.87	13570.1	14543.9	13811	12449.4	15173.1	2629.19	8823.19	11234.7	26573.1	14326.2	15362.8	9286.74	15110.4	32733.2	13288.3	9237.49	18130	17252.1	13388.6	11596.9	10550.3	13384.9	8122.73	34999.7	10784	14319.2	11594.3	19675.9	24123.5	14333.8	9505.65	9714.25	6721.32
O00488	Zinc finger protein 593	ZNF593	2	2		2173.68	1805.73	1484.99		2995.4	708.432	902.88	5043.06			3633.79	1731.05	1548.26	3537.76	1477.63	4511.25		2869.84	2029.83			6288.22	1562.97		1104.08	3996.78	782.618	2325.41	431.204		1404.91	841.129	390.827		3243.21	728.703	225.052	2521.01			1.28274	323.42	568.169
O00499	Myc box-dependent-interacting protein 1	BIN1	10	10	25915.7	8041.67	10023.1	9603.3	71511	17318	15195.4	3905.8	35972.9	82741.9	266746	8706.04	6908.14	1434.24	9654.72	12045	6990.38	50772.2	8542.88	6466.96	50453.2	39075.5	8556.69	14791.4	43432.4	22096.5	4628.63	7098.3	10477	8662.54	23526.6	7563.19	37027.2	11277.1	29224	9809.65	6032.88	3250.16	5318.66	12402.2	36946.3	60194.7	53152.5	61679.5	172365
O00505	Importin subunit alpha-4	KPNA3	3	3	22610.4	14798.3	25863.7	5740.08	22785.1	13771.1	6162.95	11644.7	22110.3	11026.1	2516.63	5142.24	6769.14	17202.8	6608.93	16233.3	5935.88	9285.39	25729.7	19610.4	20532.3	8185.17	26378.5	15510.1	18076.3	30382.3	10586	5398.33	17517.1	9265.65	14681.2	16089.6	4015.33	3658.28	19913.2	25817.7	11163.6	10037.7	7789.94	7619.96	15260	11016.9	2172.76	5411.51	26477.3
O00512	B-cell CLL/lymphoma 9 protein	BCL9	2	2		4256.96		1725.57		1669.17	120.127	4183.06	2382.62			4633.8	390.573		203.282	2198.72	236.891	1244.31	2818.62	3105.19			2277.77		4587.43	7869.98	17713.3		8430.52	21432.2	11060.5	12230.3		8771.88	8988.04		3582.03	5173.6	8430.61		2891.56	3859.29	13202.4	12512.5
O00515	Ladinin-1	LAD1	1	1				385.576												1291.08			343.497
O00533	Neural cell adhesion molecule L1-like protein	CHL1	5	5		3299.13	1547.48	828.744	8040.09			371.671	1928.56	8755.12	23381.9	1632.31			330.788	308.055	595.591	7131.73			12039.8	4076.08	1247.31	2117.23									1493.68					648.101			2770.4		2118.74	4542.14	4827.62
O00541	Pescadillo homolog	PES1	7	7	2283.52	1882.74	2201.59	3236.21		4866.41	1124.43	4176.93	2962.52			998.693	2596.85	3822.42	1482.22	1794.34	3249.77	1027.18	2660.09	1742.24			3130.17	2775.18		4873.01	1943.79	1852.33		158.567	1.04872	2082.04	202.77	438.281		3864.3	3250.99	3358.27	6236.54			2.33431	773.615		1651.15
O00560	Syntenin-1	SDCBP	4	4	5170.77	2138.63	689.51	642.374	1342.29	1439.59	3427.32	1173.94	1816.82	4657.64	5.84543	1618.36	1059.87	1633.2	1193.81	1966.82	878.446	1960.13	3879.92	1589.47		6507.86	907.719	1746.51	948.9	945.369	870.518	734.237	1205.64	2698.92	5106.14	1103.14	791.833	1043.93	4915.67	2659.44	1329.01	407.605	815.868	276.748	162.611	640.847	1551.43	1763.42	3423.84
O00562	Membrane-associated phosphatidylinositol transfer protein 1	PITPNM1	2	2		364.037	250.327	280.862	1648.24		264.861	573.745	419.643	3365.34			199.68	90.4054	176.716	392.755	437.156	858.069	287.46	1	1704.77	3427.45	188.951	1	1877.68		381.197	54.0077				178.931	719.765	207.904			521.012	438.526	699.007		592.156		497.165	740.087	1894.36
O00566	U3 small nucleolar ribonucleoprotein protein MPP10	MPHOSPH10	1	1		1742.02	1666.88	767.097				1272.2				1241.46	1134.23	1280.16	457.156		1293.21		1121.9	1326.82			2830.86				738.486	1192.23				387.304				1118.61	701.534	1018.75	1123.93			1.54376	822.748
O00567	Nucleolar protein 56	NOP56	10	10	2900.69	1808.44	2713.48	2123.34		3846.78	1896.39	5192.7	6932.35		56665.4	1144.85	1641.8	3999.18	1509.21	1666.44	3036.37	1496.04	5975.06	3020.62	4920.82	9916.41	4490.91	2845.91	1	3437.49	3264.68	3803.52	211.479	861.962	1847.38	1914.26	515.59	564.623	8566.32	15027.3	12327.7	6844.5	10142.2	2519.3	2140.91	6444.32	2534.01	879.648	996.601
O00571	ATP-dependent RNA helicase DDX3X	DDX3X	16	6	11833.1	15647	13681.1	14637.2	4286.72	15121.5	8719.85	15176.9	15837.3	13898.3	32216.6	7096.25	5065.73	10814.9	16380.6	10260.4	12662.4	6548.7	8278.98	10586.6	12047.1	12662.7	16149	5260.49	5566.39	10437.1	8805.21	8834.52	3685.95	4387.24	3830.53	10587.8	7037.36	9851.33	10093.5	16748.9	8021.41	12812.2	12286.4	9363.78	7099.82	12174.4	6928.09	2942.66	3003.57
O00584	Ribonuclease T2	RNASET2	5	5	20055.7	6455.8	5165.66	3301	3554.89	6394.68	17738.7	4681.46	14942.2	15832.8	4710.1	14403.9	7893.01	1674.73	11068.8	13725.1	4023.97	17611.9	13371.7	7122.01		7903.16	9004.8	21123.9	8212.06	5237.83	8682.28	7266.67	10586.7	8834.93	27301.5	14171	15568.8	13494.7	13472	18821.4	5433.1	3626.08	2955.09	12968.4	4475.55	8914	2742.43	4644.5
O00592	Podocalyxin	PODXL	2	2	2085.29	4355.4	2229.34	812.586	2383.06	2341.78	7844.8	2626.16	19788.6		25491.4	1934.29	1439.79		1541.72	6738.54	2852.69	21503.1		4611.09	33817.4	6569.86	2635.75	7325.07	3655.6		3106.81	1197.16	2831.32			701.968	868.453	3552.98	5726.23		6235.64		2136.22		800.898		2022.28	1991.39	5926.55
O00602	Ficolin-1	FCN1	2	2	1773.77																					4.12109			250.286			1		1							298.761	1						958.112	1.67246
O00625	Pirin	PIR	4	4	2459.82	1329	2340.84	1062.77	4415.81	993.126	1316.83	371.605	5101.04	14639.2		1725.87	772.499	1	1514.2	3257.6	1018.82	1011.15		394.301	4786.11	8432.48	4774.26	3660.79	2526.52	4084.13	1	188.748	749.093	736.938	3204.88	453.073	2574.28	1	1142.93	3490.48	267.335	560.643	207.361	2771.09	4552.85	11685.2	3303.54	6543.55	7347.78
O00629	Importin subunit alpha-3	KPNA4	9	6	13787.6	6423.03	9642.85	11525	14179.9	24181.5	8640.44	5255.99	20783.4	6721.6	7072.43	12247.5	8764.49	5742.67	10622.1	10503.2	7426.37	25348.6	23813.4	8096.13	6922.19	1506.31	5422.68	15994	14960.3	18797.7	9325.36	5903.19	10579.1	12419.5	16512	10265.6	8820.22	9139.33	11713.8	8861.62	5007.54	5828.11	9312.73	10108.3	3235.51	7866.75	5814.06	6131.25	22994.1
O00635	E3 ubiquitin-protein ligase TRIM38	TRIM38	2	2		950.073		660.502			93.9756	412.636				622.279	1323.98	1029.61	1055.52	485.184	655.821						1	1537.36				1559.84					251.874	1150.63			2132.86	1010.43	1030		739.6		842.797
O00743	Serine/threonine-protein phosphatase 6 catalytic subunit	PPP6C	4	4	6185.29	642.303	1051.14	1220.13	2454.37	830.109	1140.04	1030.47				1151.89	897.547	2732.61	1179.85	1015.88	1380.18	2015.25	1240.71	358.693		1495.6	1	51.5509		8307.85	939.599	1343.73	1361.04	1975.21	10452.6	912.827	1559.55	2097.9	1.3257		358.459	1	822.099	1	1206.84	1.27947	763.006	747.3
O00754	Lysosomal alpha-mannosidase	MAN2B1	19	19	14660.8	3028.7	5801.62	10245	2138.61	10168	5995.65	5811.7	12448.1	6694.07		5158.35	4680.84	2738.87	5299.52	6908.73	5409.45	6300.8	16206.4	5530.87	1978.05	10554.7	5715.97	12125.9	2527.56	883.352	5417.69	2868.39	7038.2	7707.01	23481	10322.6	4548.46	6508.45	11691.2	4073.2	1094.69	1226.47	1889.06	2206.77	4512.54	3562.57	1256.55	1986.97	2589.25
O00757	Fructose-1,6-bisphosphatase isozyme 2	FBP2	5	5	57.255	1312.95	39.5797	1.15629	64.8754			567.5		573.055	15110.6	169.322	1	1277.52	1		158.334	715.433				2587.99		1	13342.1	7254.75	320.092		1499.07	7131.22	3315.06	1248.37	25.8656		24399.2	12735.5	998.257	1618.72	1641.93	5077.89	1070.88	29312.7	430.496	1049.95	4993.02
O00764	Pyridoxal kinase	PDXK	8	8	9472.72	4149.62	4607.99	2671.71	30358.3	6073.55	8527.27	3611.47	7135.85	35333.5	40066.4	6674.29	2365.91	2076.71	2962.98	3169.73	2100.73	13387.9	4735.84	5627.12	26226.8	12194.8	5781.99	12786	29399.1	7563.44	3350.44	3424.98	7556.1	12668.7	17177	5087.83	15020.7	6948.18	2900.8	1682.85	1305.54	1431.73	1466.46	4975.58	17840.3	10057.3	7795.33	21900.5	29617.1
O14490	Disks large-associated protein 1	DLGAP1	2	2			939.585		13919.8							791.244						8800.06			1633.11		180.915																			1.34659	252.223	2819.86	350.938
O14492	SH2B adapter protein 2	SH2B2	5	5	1291.16	2522.3	621.917	517.073	10486.8					21985.3		838.083	3914.85	1366.81	792.702	217.22	374.279				11593.5	29749.2	1299.73					1169.32					3074.8			1825.26		3138.49			16748.4		9776.61	8095.84	5357.9
O14495	Phospholipid phosphatase 3	PLPP3	1	1		621.339			1855.35			194.728		533.502								4671.63							3342.08				478.76	2244.58	3117.57	606.094	3448.92		28781.9		1885.94	2841.24	1430.12	4683.86	7736.1	10689.4	11558.6	13097.3	26268.2
O14497	AT-rich interactive domain-containing protein 1A	ARID1A	14	14	691.435	719.79	682.894	899.2		1044.29	916.125	1433.54	4145.19		11483.8	662.543	1256.23	1236.97	1779.75	1317.15	1611.46	2063.38	3295.23	949.505		5.54207	4042.45	843.632	775.354		269.817	524.595	1313.38	1305.44	1	448.294	271.561	916.315	1.85373	4083.5	1609.62	494.131	1307.95	360.152	59.7928		512.197
O14498	Immunoglobulin superfamily containing leucine-rich repeat protein	ISLR	2	2	1203.82	180.985		36.6896	207.485			403.556				920.576				185.544		492.042						1968.49	8007.9		519.06		991.587			383.007	588.482		2240.88		126.47		196.353		392.013		748.717	377.977	1125.58
O14522	Receptor-type tyrosine-protein phosphatase T	PTPRT	3	3					1674.85							222.494		1				25232.3					256.021																1				479.687	1366.49
O14523	Phospholipid transfer protein C2CD2L	C2CD2L	5	5	941.555	975.278	2004.22	1218.77	12200.3		1115.81	219.91	4027.97	2014.31	15.9565	1569.46	826.75	468.043	1433.39	1031	1295.48	26526.9	294.006	1304.91	15422.5		3024.56	3128.1	1276.82	2677.36		1249.17					676.148	341.873			233.191	435.385			842.219		1842.08	3028.56	5327.93
O14526	F-BAR domain only protein 1	FCHO1	6	6	4253.89	2060.02	2439.66	1720.4	4257	5665.53	1827.7	1	8913.77	1.0228		955.124	2516.28	3811.48	1911.45	1578.8	2303.15	1100.83	2281.31	1189.28	6.44389	3.52071	6890.85	2497.62		3840.85	1.57286	3477.03	1182.9	3643.63	1	1518.19	2761.81	1597.54			4532.57	3009.78	479.401	464.992		2.81123	3570.19	1.31512
O14530	Thioredoxin domain-containing protein 9	TXNDC9	3	3	230.224	309.824	792.015	388.13	464.14		622.893	325.435	655.291			894.273	302.14	1107.13	2167.22	530.304	259.994	567.657	616.966	1410.66			995.722	672.581		171.631		386.205				568.427	236.937				311.875	526.85			380.649		364.907	107.495	864.202
O14531	Dihydropyrimidinase-related protein 4	DPYSL4	14	14	5991.45	6546.48	4445.56	8861.21	9442.89	3261.23	3883.66	17105.3	13018.3	55958.7		1073.19	6506.6	4623.82	7984.27	6927.77	12270.7	114953		4887.54	6717.87	40821.4	8531.74	9450.51	31435.8	44016.8	11479	5790.69	11049.1	7235.4	16468.1	5228.79	10457.4	6459.15	49818.6	3177.75	7083.89	12745	9463.96		1311.9	77683.8	16805.2	27250.2	63522.2
O14545	TRAF-type zinc finger domain-containing protein 1	TRAFD1	2	2	1874.42	1606.49	917.086	1287.51			2529.86	201.852				512.697	909.225		311.212	2491.33	291.925		287.272	2038.57			3354.16										479.754				1258.26	1338.24		601.857
O14548	Cytochrome c oxidase subunit 7A-related protein, mitochondrial	COX7A2L	2	2	4352.95	2290.84	2055.05	1411.67	9052.41	1237.32	1349.59	802.175	3556.66	4245.51	26130.4	1487.54	1234.03	1836.95	1408.26	2630.98	3412.03			762.008	10032.9	2629.41	1857.13	1399.14	1430.3	2327.02	1.27021	609.837		1739.39		497.645	1216.31	542.692			2955.49	996.52	1353.84				1953.88	4123.13	8970.42
O14556	Glyceraldehyde-3-phosphate dehydrogenase, testis-specific	GAPDHS	1	1													416.595	5031.44											2853.81	27471.2	5778.99	1750.35	1613.5	8073.3	12211.5	410.895	4693.47	1815.53	41013.3	42998.6	1266.1	2054.75	3021.86	4617.05		38584	5281.46	11142.6	1415.57
O14558	Heat shock protein beta-6	HSPB6	6	6	3268.8	3963.39	4784.62	1257.1	8049.56		4387.31	6444	6685.03	35536.1		3846.16	2873.93	26708.9	2686.51	4064.66	2014.95	4128.25	625.077	913.71	16364.6	32221.5	3770.33	5037.48	14512.9	3558.37	5693.91	1197.08	2896.38	3372.86	30477.7	1681.94	3106.02	2867.09	16951.1	11851.9	451.507	1049.82	2891.7	2942.3	5762.42	16603.8	3402.54	3999.44	19309.5
O14561	Acyl carrier protein, mitochondrial	NDUFAB1	1	1	6581.56	7110.99	4452.8	2804.72	42582.2		2125.58	703.258	3769.3	1174.85	4730.84	6411.34	5245.84	1640.93	4720.44	1894.49	5290.75	18092.9	11823.8	8208.5	20773.2	2464.48	1350.02	2056.66	21870.2		12701.7	13123.6	11574.9	3188.71	28975.5	13700.7	27524.9	14177.2	8336.7	3686.07	7847.89	4115.51	20558.4	13241.2	9442.59	9245.9	17365.7	110837	252042
O14562	Ubiquitin domain-containing protein UBFD1	UBFD1	2	2	237.919	68.744	780.952	308.726	1113.81		989.747	208.367		1		1089.22	1076.08	467.867	336.702	470.797	547.102	426.36	617.183					538.359	1		566.838	1047.24	451.22			593.804	696.943	701.403			206.475	239.229	679.591			563.572	208.012	2068.82
O14576	Cytoplasmic dynein 1 intermediate chain 1	DYNC1I1	5	5		2661.73	11188	1951.98	20775.7	446.864		233.008		11153.9	126933	23780.2			1265.52	1924.63	1726.97	7089.02		616.033	87431.8	20337.4	2571.38	5538.89	9588.32	3827.44		1215.92					3281.42	1537.4			545.217	1202.11	669.6		9333.88	10762.2	5715.14	12335	26017.3
O14579	Coatomer subunit epsilon	COPE	6	6	2730.42	3807.65	4461.78	4786.25	3393.83	3659.44	3956.64	2769.51	2798.57	5371.81		2509.25	4122.57	3677.33	4145.54	4187.51	5852.06	1702.98	6541.82	3160.85		605.722	2373.36	2364.29	2305.21	3446.5	4069.24	2860.29	4338.23	3735.28	4864.21	3448.23	2702.52	3851.1	420.383	1.67151	1733.86	1087.38	3034.54	2376.84	519.198	25.4122	1157.01	1577.05	1363.02
O14593	DNA-binding protein RFXANK	RFXANK	1	1			336.848	736.79			1920.98	174.105				305.624	687.287	615.334	377.384	151.447	661.713	247.066												250.901		289.238					605.106	190.701	300.621
O14594	Neurocan core protein	NCAN	17	16	3192.34	3178.97	5205.46	1513.2	38225.3	2415.61	1635.6	3846.15	2032.62	19543.8		5529.56	1591.59	2051.23	1739.18	1185.87	2403.43	15099.2	2739.5	1497.17	35508.1	27193	1660.73	4073.09	17509.3	6638.7	3691.19	4389.92	8835.29	5806.02		2263.94	10432.6	3633.83	1470.98	43066.2	975.688	2256.33	4978.2	2570.19	10087.1	40677.7	17851.7	26858.8	62942.2
O14602	Eukaryotic translation initiation factor 1A, Y-chromosomal	EIF1AY	1	1	972.53	2006.37							1319.56				4617.03	6424.23
O14613	Cdc42 effector protein 2	CDC42EP2	4	4		382.296		60.1614				462.785	1.31513	5389.14												1601.41											1815.99								3651.47	2739.61	1968.87	4255.98	6130.58
O14617	AP-3 complex subunit delta-1	AP3D1	8	8	4279.4	1922.65	1897.8	3487.75	8850.57	5613.46	2508.65	2943	1764.16	989.709	5.34193	1587.6	1627.94	2810.62	2304.65	2551.04	3118.01	2472.53	6824.19	2345.54	4921.81	9813.54	1155.99	3041.19	5525.86	3790.93	1714.05	2031.86	1148.21	3335.79	630	1225.14	2945.56	3889.05	2275.48	2946.03	2750.27	4076.85	1852.98	2325.36	1473.02	3770.42	3022.72	4297.34	26482.3
O14618	Copper chaperone for superoxide dismutase	CCS	3	3	49997.5	14848.1	34708.8	24281.2	27652.6	75161.7	44034.8	19277	24939.8	41014.9	7814.63	18890	32042	25073.6	23417.8	36097	39177.5	37935	145934	27766	21903.4	34018.7	16424.7	56533.4	25772	69086.5	41111	21769	37088.7	66787.4	84249.3	33303.3	31002.5	47891.3	59915.9	41043.2	19932.7	22579.2	19139.8	43367.9	39944.3	56618.5	8505.52	26936.7	71667.6
O14639	Actin-binding LIM protein 1	ABLIM1	7	7		1202.72	1474.62	811.995	3103.31			400.559	3272.76	5590.69		1327.42	1917.06		273.436	1562.21	380.569	41567.5		114.262	16771.3	10504.4	1236.12	2605.73	2396.07	835.239	402.248	103.936	2315.65				529.703	227.681	5894.31		1	1193.08			3828.77	4835.35	1784.88	2564.95
O14647	Chromodomain-helicase-DNA-binding protein 2	CHD2	4	4		463.873	152.705	145.668	3538.66	1641.92	1114.42	738.832		769.8	11566.5	667.841	1005.46	205.836	332.11	519.05	946.298	2703.41		329.864	2.20383	3.18059	974.906		1438.57	364.235		435.92	691.202	256.02	937.859		3150.75	408.825	1355.45	2.32906	1853.02	1101.11	252.192	1.52545	589.754	2.08553	528.173	205.468	1591.1
O14653	Golgi SNAP receptor complex member 2	GOSR2	2	2	285.375	496.962	690.983	551.315		982.635	1012.05	826.965	833.295			961.334	1086.78	2348.32	1332.6	992.289	339.859	6843.43	1278.02	1019.27			434.532	210.743				1548.93				235.913	135.715	234.05			1811.98	357.973		1			193.984	90.3847
O14656	Torsin-1A	TOR1A	1	1	4033.26	1105.13	1380.31	1852.63				1108.22	523.496	587.695		854.542		439.883		595.945	415.539	1429.52		1975.73			746.127	115.758			938.42	954.67				129.198	264.351				1746.57	1750.37	1987.17	1785.57				807.597
O14657	Torsin-1B	TOR1B	1	1	6294.28	921.853	1536.02	3675.12	897.867	2699.28	1550.26	1290.52	5092.9			929.153	941.687	1042.34	803.483	3462.45	1190.83		1391.58	4472.27			2101.36	781.247				806.262					146.463				2568.21	1455.34	681.516
O14662	Syntaxin-16	STX16	3	3	3218.25	2361.54	2330.06	1970.9	9059.71	5834.74	2347.97	2526.44	12478.6	16771.5	26974.9	2069.03	1398.63	1918.66	1279.75	2489.84	2394.48	3031.71	4251.96	5256.78	41171.1	18866.9	5015.67	4572.69	5929.6	551.819	1335.06	705.076	968.525	1965.14	12928	3200.68	789.852		6075.06	3969.33	2636.38	1807.33	824.713	8184.51	2936.17	6937.27	1271.71	2462.19	2397.03
O14672	Disintegrin and metalloproteinase domain-containing protein 10	ADAM10	4	4	5953.34	3472.25	3510.64	4674.14	3275.69	1615.83	3313.16	3234.27	3052.36	12321.5		2472.41	1988.89	4068.07	1684.13	4360.68	3846.26	2768.2	3398.68	2832.92		16135.1	4399.43	5574.34	2347.11	7466.82	3351.76	2227.87	5162.63	6880.55	8053.64	1893.95	1879.83	2313.6	10511.8	4872.54	5987.18	4187.62	4533.48	6851.72	9816.71	10137	6150.34	8058.03	8636.01
O14681	Etoposide-induced protein 2.4 homolog	EI24	1	1	6107.97	2543.29	7411.62	5170.01	1460.43	6145.9	2019.03	2624.45	7728.75			688.772	2619.21	3171.2	3918.5	847.81	4647.58	2260.09	9710.45	1124.03			3899.43	2843.97	1263.41			458.252	2377.84	1747.79		4124.79	900.806	1212.85			14302.4	3848.51	7341.55		1186.76		3508.29	2051.32
O14683	Tumor protein p53-inducible protein 11	TP53I11	3	3	599.865			634.046									860.672				1											384.901		347.705						619.694	692.135	187.971		1238.03			108.938
O14684	Prostaglandin E synthase	PTGES	1	1	663.531	1		55.3396			143.895	131.019		1.63136		184.566		299.595		85.1419			600.359	1535.5	1514.59	1.95135	1202.75	2504.32	2.05491	3195.83	509.69			813.824	127.659	368.786		389.791		4.81099	1	1	92.4409				67.0164	580.721
O14686	Histone-lysine N-methyltransferase 2D	KMT2D	1	1		555.07	1164.59	928.995		476.622	297.247		1327.92			1378.99	776.17	438.521	212.848	944.025	581.674	3362.39	1126.26				1092.38										1				199.967
O14713	Integrin beta-1-binding protein 1	ITGB1BP1	1	1						474.599	803.512	99.7082				266.336							1177.88								224.524	412.393		196.938		23.4517	220.526						526.409				178.998	334.031
O14727	Apoptotic protease-activating factor 1	APAF1	1	1	2592.37	1789.56	2348.48	2395.99			4165.07	2242.86				1087.32	960.997	1842.26	2690.99	783.285	1325.43			2862.99			3197.78	2369.57				2284.95				992.914	1702.86				2240.52	1433.16	1352.87				964.164
O14730	Serine/threonine-protein kinase RIO3	RIOK3	1	1		690.055	556.215	1385.15		1571.01			2992.96				2325.24	823.999			97.9274		2774.35	832.929			4817.44					1044.85				1136.7	1523.6				752.409
O14732	Inositol monophosphatase 2	IMPA2	2	2	410.474	449.519	224.388	757.66		376.542						417.227	30.0074						31.401					264.297	2141.31		508.077	76.4771	922.853	439.483		370.689	2013.51	1145.47		898.279	237.776	2336.32	187.729	1.35778	1460.9		798.093	1251.32
O14734	Acyl-coenzyme A thioesterase 8	ACOT8	4	4	6488.44	2313.86	4128.77	3502.44	6864.7	4345.27	4376.15	4220.01	6718.39	3839.56		2046.97	2491.31	3751.48	1592.39	2598.39	3166.9	4346.7	1956.95	2152.04	6974.68	4213.15	3551.98	3469.33	1843.03	2419.04	2618.24	2000.56	3581.26	3726.28	3435.3	2251.12	2420.06	2856.67	2251.42	3376.59	3432.08	2904.04	2367.25	3157.33	3132.29	3278.57	3931.31	5272.9	4680.44
O14737	Programmed cell death protein 5	PDCD5	5	5	8197.67	4908.84	6301.95	5249.75	9049.25	18840.8	7040.06	3825.3	10384.9	11471.1	12589.5	8056.17	7718.19	7241.75	11484.3	5853.08	6842.85	10377.9	56811.8	9398.64	7395.46	11788.4	6236.6	7499.34	6684.22	6997.08	7043.58	5333.55	14031.8	10326.5	18446.1	10395.8	8819	10227.1	3347.98	9339.23	2366.34	769.724	2780.31	1389.46	4364.55	3646.18	2592.5	5657.89	13862.5
O14744	Protein arginine N-methyltransferase 5	PRMT5	10	10	6551.64	4107.67	5367.42	3593.01	4072.79	6820.61	4473.98	2646.2	10156.1	771.025	1992.01	4722.33	5411.86	3999.09	6269.27	5716.52	4460.03	15409.7	9652.04	3788.37	6534.62		3464.35	2845.77	4102.8	5743.79	5496.07	3817.51	9694.24	4226.61	20445.7	4159.7	3457.02	3763.93		5913.52	3755.81	6097.12	5752.89	6854.24	4183.87	1525.76	2799.56	4300.65	3681.56
O14745	Na(+)/H(+) exchange regulatory cofactor NHE-RF1	SLC9A3R1	11	11	11518.7	9466.96	16633.4	12207.7	36192.6	16290.4	9440.44	5017.89	26458.1	43793	99805.2	17159.4	11910.8	7564.06	13276.7	20703.1	16228.7	48671.7	30296.9	13392.9	68363.7	27665.7	31345.6	20764.2	23263	14488.8	20735.5	10797.2	23318.1	27754.4	30861.2	10065	14184.7	22352.9	47148.7	15894.9	4987.1	8468.64	8353.92	18031	26067.6	26418.5	14227.6	25151.2	67439.3
O14757	Serine/threonine-protein kinase Chk1	CHEK1	2	2		1342.92	1429.09	1294.92		1455.05		104.625				672.2	635.416	1644.77	3402.77		1521.69						3252.71					791.391											926.791
O14763	Tumor necrosis factor receptor superfamily member 10B	TNFRSF10B	2	2				3537.22				1	3049.72
O14773	Tripeptidyl-peptidase 1	TPP1	11	11	7166.26	3726.98	3946.18	3165.77	6172.02	6043.23	7419.35	3528.43	11541.2	6878.8	65867.8	4086.22	3783.78	2601.77	6653.54	7910.57	3578.93	3511.97	8682.34	2912.95	25134.8	23651.9	4370.2	14513.7	10195	28818.2	4779.27	5673.23	11069.3	10425.8	30653.2	5303.1	7956.52	11713.3	115513	18059.5	4022.89	5870.52	1283.62	13663.2	16320.9	37540.1	3043.98	8241.54	40396
O14775	Guanine nucleotide-binding protein subunit beta-5	GNB5	5	5					16143							1510.45				62.6647		10492.8			6453.84			254.243	10833.5			512.303			1788.85		2460.25	1017.23				1	1587.96		1206.35	3.27402	2330.13	8706.67	7762.47
O14776	Transcription elongation regulator 1	TCERG1	9	9	2144.72	4638.61	6723.22	4553.08	5235.54	7837.4	4882.09	5640.61	11622.4	1513.51	27354	3242.79	6761.19	7952.82	5517.73	4419.97	6264.19	2872.54	4537.46	5811.58		1.53237	11347.2	5880.18	1271.51	11369.2	3430.27	3906.65	9320.13	977.867		3037.31	1673.85	2529.23	2972.53	3798.51	7880.98	5339.56	6015.82	3938.04		3693.63	2403.1	823.301	401.567
O14777	Kinetochore protein NDC80 homolog	NDC80	2	2		783.872		392.758		1896.43						411.375	517.299	1071.3	1186.87	1106.58	709.629											210.364	1350.15								298.323		109.773	1				290.851
O14786	Neuropilin-1	NRP1	3	3	433.506	306.323		833.52			310.787	349.263	83.6905	1.37461		442.736		294.333	303.247	426.514		805.222			3.35134		68.2889	1158.17		772.286	1	80.1193				1	11.1542				73.6603	230.527	162.886				112.677	1
O14787	Transportin-2	TNPO2	5	3	5978.45	6493.67	8036.05	7690.44	6950.98	5253.88	3764.8	5830.62	10463.1	6861.7	21653.6	3467.1	6958.82	7586.37	8689.48	5204.12	8129.48	5896.35	10318.4	5843.17	9596.58	2720.9	10722.2	7774.65	2648.06	3190.67	2623.61	3722.02	2571.25	3101.17	1648.03	3544.1	2856.49	4082.46		3616.31	4212.88	3740.57	3267.12	2541.53	3415.39	5895.07	2799.48	1821.05	4842.58
O14791	Apolipoprotein L1	APOL1	1	1	7813.3	261.773	2187.96	4988.78	4479.65	584.734	2870.01	519.573	2541.76			4384.62	1928.32	647.092	3935.86	11971.3	881.2		1550.43				7310.31	1193.93	1378.29	4299.65		630.046		857.194	1128.56	497.478	429.795	823.912			1002.04	178.545	292.171	1	4323.72		2071.99	298.292
O14802	DNA-directed RNA polymerase III subunit RPC1	POLR3A	3	3	1124.15	540.205	1200.89	2415.51		1392.45	713.321	1218.13				351.506	1143.05	635.544	2017.96	944.142	2750.89	268.768	3148.77				999.097				659.259	339.149	3710.65	843.07		754.563	793.595	2146.52			1778.34	530.407	2140.66				273.773	86.5889
O14807	Ras-related protein M-Ras	MRAS	4	4		654.277	1238.84	738.727	10365.2	1290.64	539.552	223.934		3193.26		1409.03	252.458		575.628	6654.14	7091.15	16740.9		262.984	3901.97		960.414	972.639	696.888	2662.82	1666.52	576.211	390.152	995.087	3337.4		1355.6	1535.23			2005.92	1233.83		1044.34	4192.22	5500.8	2108.21	6077.78	12355.6
O14810	Complexin-1	CPLX1	3	3		2251.35	7050.69	1911.56	83970.7			31.6704	3085.57	41649.7	36753.5	4485.35			1824.26	3525.45	466.396	12086		1	51584.3	28439.9	1178.93	9867.71	28371.4	4994.86		7001.73					74639.9	4048.63			957.447	2322.75	5079.75	1.04949	15567.8	1299.73	17444.8	19522.5	174486
O14818	Proteasome subunit alpha type-7	PSMA7	10	6	18362.7	15751.3	13057.1	12689.3	16169.1	22527	19929.9	12583.8	11764.3	19964	164661	10759.4	17752.3	11584.4	17012.9	11039.5	9830.76	18649.3	22612.8	17220.2	30851	33401	11306.6	13506.2	39606.7	45652.4	17148	14144.3	38374.4	42596.7	70118.6	28407.9	19241.6	24113.8	114106	86686.7	14774	22308.9	18579.1	60952.2	28267.7	57453	13485.5	16846.7	40888.4
O14827	Ras-specific guanine nucleotide-releasing factor 2	RASGRF2	2	2		633.889			3558.82		1										1	504.857															1				274.738	1					2491.57
O14828	Secretory carrier-associated membrane protein 3	SCAMP3	5	5	3446	1214.53	1619.81	3552.83	3804.93	7140.33	1931.33	2157.38	6003.4	2765.75	2464.07	2178.71	2048.71	1277.63	1643.59	2917.83	2388.82	11356.1	17853.4	3128.57	5157.73	7935.43	3324.01	2655.62	2397.76	2347.48	5042.34	1719.56	4765.93	3680.51	4640.78	1174.18	2122.29	2360.25	2459.27	1624.9	3617.98	1485.56	4570.85	848.566	5760.16	1437.22	1742.65	1713.98	1031.96
O14841	5-oxoprolinase	OPLAH	8	8	5125.91	3562.71	8439.67	4846.7	6203.32	5279.84	4157.63	6454.38	35761.5	11588.9	62.7833	3622.99	5523.98	11422.2	6423.71	3621.08	6242.21	13551.6	3926.19	9769.49		3.33687	12844.6	6205.37	697.616	28252.5	6980.6	8184.66	12517.8	3967.17	15144.2		2511.9	4507.87	2.83763	3.4773	5159.27	640.367	11297.9	1.28288	682.676	2.72201	3264.04	882.5	1.84316
O14862	Interferon-inducible protein AIM2	AIM2	1	1		2197.12	573.866	4808.69		4095.67	575.195	2168.24				249.516	1874.94	1682.41	1953.11	1226.53	1802.18		1469.19	861.463			2444.66					1034.01				353.742	815.957	605.579			3290.73	648.355	1117.81	1595.37			837.888
O14874	[3-methyl-2-oxobutanoate dehydrogenase [lipoamide]] kinase, mitochondrial	BCKDK	3	3	4616.89	3357.03	1784.93	2073.73	3259.07	449.915	1420.04	4205.71	6713.3	5379.74		1066.61	1130.57	2143.78	1670.81	1734.03	1514.71	7364.5	1920.17	10337.3	13290.7	1782.63	9030.22	4212.63	921.28	158.305	1173.08	2865.75	1985.32	5970.56	3005.98	1500.8	671.032	1281.69	1.20208	1.0693	2728.7	3048.81	1649.71	4567.98	1084.88	2899.52	1877.9	3294.95	2665.41
O14879	Interferon-induced protein with tetratricopeptide repeats 3	IFIT3	6	6	4454.15	3801.74	1194.17	1073.49	2673.42	1589.02	1753.12	1419.64	3270.05	13528.9		1436.21	647.419		4527.12	2818.25		1313.45		11452	17923.8	37873.7	4665.18	5217.91	3683.45	5807.16	1762.66	1414.5	1	2958.76			2877.25	2925.27	19649.1		1355.03	4125.58		6556.75	9337.52	21513.6	2385.56	1876.96	954.99
O14880	Microsomal glutathione S-transferase 3	MGST3	4	4		1184.12		536.486	5371.6			1911.3		2763.14	68595.4	328.084			64.9234		1	1294.39		3365.49	29259.1	9754.79	224.727		3997.8			869.778		1161.11	784.809		745.668	1347.54			765.073	792.476	1938.71	1828	5380.89	983.372	2791.68	3102.62	4741.76
O14893	Gem-associated protein 2	GEMIN2	3	3				671.398		5049.72			4996.14			23.3756	53.8519		105.953	58.1512	501.451		3886.99				1					46.0205												5197.64			2463.82
O14907	Tax1-binding protein 3	TAX1BP3	1	1	238.646	70.7877		855.454			150.819	112.846		1.26775		1847.7	550.164	159.983	1	44.4242		201.195	65.8736		2.27288		169.225	713.232	4773.96	2822.12	734.025	180.704			6953	547.263	2534.05	3587.46	2.39855	838.316				1975.85	840.837	4718.29	1644.54	4007.2	10831.7
O14908	PDZ domain-containing protein GIPC1	GIPC1	6	5	1968.65	1235.56	1789	2557.72	3708.6	2276.62	1772.38	846.72	4491.05	7754.44	4.81827	1777.55	929.409	1466.85	981.868	1230.24	505.342	4222.18	2195.71		2034.83	3296.56	2261.75	1224.18	2274.59	7934.27	647.386	704.403	1199.11	1358.36	2179.26	453.669	3704.21	2246.46			654.593	808.037	462.762	4258.53	4333.85		2595.65	3663.54	7396.5
O14910	Protein lin-7 homolog A	LIN7A	8	3	5296.82	3153.98	829.507	337.208	10022.1	3991.38	2328.53	1612.27	296.889	12278.6	81860.3	2330.14	581.044	1620.96	800.218	337.818	66.5188	14248.6	3338.4	3390.81	59658.5	19590.7	343.151	5466.65	10055.2	653.136	5296.99	1915.09	1998.39	1785	1550.07	2461.31	3059.32	2672.26	15751.6	5585.13	1256.66	2059.37	1944.76	10793.1	19387.2	25850.3	4985.32	15899.9	23063
O14920	Inhibitor of nuclear factor kappa-B kinase subunit beta	IKBKB	4	3	1744.42	3282.18	7414.95	3180.12	5541.69		4336.41	3638.62	6275.49			2456.43	2979.81	3680.17	2874.65	2189.14	2856.9		4169.49	3204.1			4171.56	1902.01	1334.14	13744.7	8127.12	7867.85	7524.38	2349.51		6067.72	4966.37	5803.52		7268.76	5592.56	7147.93	3797.17	10761.8	20961	5469.05	7014.79	16351.4	31426.5
O14924	Regulator of G-protein signaling 12	RGS12	1	1		1787.11	476.949		9009.38							351.843						2381.6			1920.48																		2031.87				956.755	701.976
O14929	Histone acetyltransferase type B catalytic subunit	HAT1	6	6	2967.59	1672.2	6091.83	2718.3		9865.46	3445.67	3161.6		295.206		4291.09	7299.53	11504	4614.84	4859.49	8740.19	25409.9	10634.2	2155.62		1.0509	7267.36		1	1818.06	4465.78	5887.27	5861.85			2980.38	3073.82	4559.28		5952.11	1822.18	1846.21	4525.44	1248.72			935.569
O14933	Ubiquitin/ISG15-conjugating enzyme E2 L6	UBE2L6	6	6	2540.85	3739.64	1282.48	596.018	31.9515	799.334	1716.05	1411.44		9240.85		882.985	1808.35	132.762	829.942	884.551	659.781	3315.76	8818.88	4297.31		1548.82	3597.27	3213.95	294.374		3488.81	1519.67	7350.74	10418.1	5647.72	4166.92	936.516	4394.05	1036		1480.68	2778.86	540.082	2372.21	1496.97	1	514.074	411.186	6545.97
O14936	Peripheral plasma membrane protein CASK	CASK	5	5	478.031	1047.41	1034.2	1057.21	4901.43		336.141	571.166	1833.19	1845.11		650.34	1195.29	74.9857	1140.83	689.285	742.733	2401.94	770.838		1997.05	1126.6	418.32	667.241	1592.24	3441.38		291.429					539.655	495.1			456.068	216.682	287.667		2481.47	4.34063	1724.09	2101.07	984.768
O14949	Cytochrome b-c1 complex subunit 8	UQCRQ	2	2	14615.9	6279.93	3641.58	2523.44	12340.6	740.329	4811.11	7783.93	2315.46	38690.5	117847	5816.93	4671.78	7795.22	2895.87	1675.64	3480.02	12979.7	1404.58	9073.32	43842.9	49760.4	3517.67	4291.41	1649.08	733.585		309.281					1083.77		2.09098	4632.21	1472.69	772.773		912.437	3709.06	13633.2	922.956	4909.54	5092.84
O14950	Myosin regulatory light chain 12B	MYL12B	9	0	64981	23349.7	31721.2	29122.8	32620.9	43558.8	39327.3	34576.3	104155	81744.2	616820	26547.4	32848	32343.9	28024.7	20345.3	24914.9	20532.2	58135.6	74793.5	242488	123446	84495.4	54059.7	30167.3	49798.8	31671.9	15603	28749.3	26415.5	79787.1	43432.2	16448.7	25713	111708	154000	21597.4	24708.6	19380.5	64385.6	78133.8	166297	21060.2	41862	63248.3
O14958	Calsequestrin-2	CASQ2	7	7		100.15							797.297				92.495	647.066				11788.5							1260.07	10896.8	5584.93	417.357		912.711	4808.85	160.367	1083.95		42974.3	24824.8	1487.26	1339.27	818.769	5443.51		36950.9	1753.84	2884.64	4683.43
O14964	Hepatocyte growth factor-regulated tyrosine kinase substrate	HGS	5	5	1519.55	1304.92	2185.34	571.467	4561.87	1	1946.11	2205.79	7138.94	1217.91	13490.8	629.384	1186.9	855.242	1466.84	1426.14	1874.82	98.4685	929.868	2271.9	3695.95	1405.89	3001.04	1481.06		3847.71	855.892	845.239	1	159.268		196.385	777.234	149.402	2.64646	4.78882	748.739	1783.35	1014.81	489.399	972.036	1.93346	1237.05	1868.49	1644.38
O14965	Aurora kinase A	AURKA	2	1	8458.53	429.326	654.749	208.607	2221.08		3284.71	509.252				477.457	613.249	1530.95	583.739	105.345	1489.36	1196.07		2002.38			2741.11	1634.18	1313.08	122357	19975.3	5738.35	1064.74		59054.4			3545.49		24145.9	9266.22		475.295	23241.3	26233.2		1952.58	3954.89	5430.63
O14966	Ras-related protein Rab-7L1	RAB29	6	5	5992.24	2662.78	1468.52	6727.55		8640.4	5933.39	4225.9	3901.66	3871.34		1523.8	1181.59	574.856	465.046	6791.54	7895.45	5358.32	7979.84	1147.94	1044.81		2563.74	1006.55	2607.26	11495.4	5412.2	1507.83	3112.09	9494.57	30949.6	5499.44	3321.06	3924	1906.15	14721.9	11221.4	7150.05	24729.9	8961.99	7440.15	5019.24	3105.17	1224.49	3104.84
O14972	Vacuolar protein sorting-associated protein 26C	VPS26C	1	1	4862.1	1333.71	679.77	2243.06	1084.37	522.403	1198.27	2186.11				242.388	593.388		1135.08	4132.65		788.805					300.309	1033.35	1768.39	3171.74	805.644	2716.81	1277.42	9451.92	6238.6		1510.58	2153.34			4688.41	3415.24	4451.98		590.134		3059.58	728.109
O14974	Protein phosphatase 1 regulatory subunit 12A	PPP1R12A	8	8	1837.45	3701.95	4111.5	2773.6	6028.41	4176.69	3312.6	3485.04	7438.66	2230.4		2501.83	3035.21	3739.32	4795.83	1983.98	3355.72	5250.96	1962.77	5601.45	2633.39	1471.01	4666.84	2592.54	1579.34	3569.24	1958.89	1843.4	1338.1	1020	963.386	1208.59	1746.66	1762.51	1434.42	1262.57	2748.95	2464.11	2323.2	1974.22	1221.15	3901.62	1218.53	1545.46
O14976	Cyclin-G-associated kinase	GAK	4	4	1686.75	868.025	616.182	1985.38	2347.11		2429.05	2321.33	288.578			809.712	1176.04	1719.04	2349.24	2290.57	1620.6	4302.61	991.887	523.451		571.523	1161.5	872.113	3594.53	1095.53	954.124	1793.42	667.886	1490.09		1716.15	2270.71	3617.49	1.22641		2759.77	2966.87	1723.15	2432.57	119.991	1.81084	1597.2	838.829
O14979	Heterogeneous nuclear ribonucleoprotein D-like	HNRNPDL	7	6	16002	56325.2	34462.3	19652.3	20853.8	30126.6	15098.5	45740.5	44696.8	38007.3	300961	18214.3	29195.5	60867	26599.2	12860.1	30175	9504.62	24329.2	59041.6	50737.8	71777	56019.7	28460.3	13779.8	27702.6	27381.1	20928.7	23539.9	10974	29114.9	26351.5	11253.5	18892.4	68438.8	80555.3	40654.8	36479.7	36216.9	32863.1	20209.1	66523.7	20617.8	19402.1	34868.6
O14980	Exportin-1	XPO1	24	24	4557.78	2322.54	3604.06	3138.05	3366.53	5469.32	2744.04	2787.73	5214.75	3210.61	15317.2	2182.05	5392.39	4062.92	3207.1	2672.28	3061.18	1010.14	12439.2	3096.32	3569.78	5280.57	3567.03	4088.32	1581.45	4421.46	2006.32	2060.03	2657.7	2314.88	5506.52	2373.61	1544.51	2067.17	5284.38	4882.35	2942.42	2688.16	2908.86	2386.39	1286.24	1889.9	1527.39	2082.9	3577.78
O14981	TATA-binding protein-associated factor 172	BTAF1	9	9	1865.44	1839.43	1773.67	2252.47		6722.35	2566.99	1386.95	1982.44			1714.04	3016.49	1616.59	2452.14	1817.3	4495.01	2201.64	5073.52	1485.23		796.046	3107.47	1104.78			346.3	1470.44	3495.92	1518.77		2206.44	1268.69	2440.7			1439.31	60.8255	1464.84	188.011			575.53
O14983	Sarcoplasmic/endoplasmic reticulum calcium ATPase 1	ATP2A1	16	5	3585.72	2423.12	3132.18	6177.81	6779.53	4079.27	4327.82	6899.47	19694.1	7901.32	28982.8	1652.31	1754.54	16594.3	4258.81	7444.8	6082.79	13932.8	6810.21	3897.22	31465.8	51165.3	11167.1	14402.6	16559.8	76757.2	15130.8	5456.22	2731.34	8084.08	39274.4	5182.09	10077.9	5854.2	141733	109788	17474.7	20162.2	15315.4	19153.5	11991.7	192120	15599.2	19384.2	47274.1
O14994	Synapsin-3	SYN3	4	4			847.178		11026.3				1332.56		121299	408.162		357.918	6.38386	187.639		952.052			3958.23	7901.06	2084.84	1539.66	10177.4			480.803	8159.4	4625.6	10886.4		443.1	339.472	162921	37805.2	11536.6	6879.32	1.52442	14610.8	17050.9	30796.4	2205.73	1862.45	13924.8
O15020	Spectrin beta chain, non-erythrocytic 2	SPTBN2	28	28	3300.89	1172.83	2003.84	1265.7	13011.9	1720.91	1160.84	4836.09	9612.63	5363.68	7003.45	1552.38	4316.55	989.875	456.193	2132.46	376.391	7748.55	1	2357.97	12794.7	9732.87	4336.76	2143.82	5386.73	604.863	2216.78	3314.52	1369.11	1906.79	2501.41	636.476	4106.78	1372.83	917.167	1755.74	337.057	327.325	1418.19	1406.51	2376.11	1084.05	2452.33	3729.61	4999.24
O15027	Protein transport protein Sec16A	SEC16A	9	9	1871.26	1756.85	1697.07	2410.08	1504.05	2059.43	1645.12	2331.6	15874.9	1003.41		2729.72	1272.51	1702.62	1493.53	1681.43	1592.97	3387.05	5204.69	3743.58	1018.44	2066.96	3837.28	2917.42	986.241	618.299	1602.13	796.14	828.881	1150.32	8406.57	968.421	494.039	1191.73			1539	1345.04	1146.9	1143.59	91.8422	2.20858	541.41	792.143	8453.74
O15031	Plexin-B2	PLXNB2	10	10	3908.32	1526.7	2758.46	1305.48	4708.9	6627.38	2448.88	1698.39	7006.58	3975.91		3298.11	2062	5042.07	1960.36	3610.55	1885.17	12958.7	3055.35	2279.41	16776.2	5988.3	2826.13	4959.92	4560.76	7451.65	267.642	1131.04	1911.73	3853.97	4138.69	1359.7	939.083	997.944	6244.67	5043.78	474.59	1445.59		1574.22	9760.7	20551.1	1519.02	2076.99
O15042	U2 snRNP-associated SURP motif-containing protein	U2SURP	7	7	4148.16	10242.5	15228.7	12448.4	12553.8	20426.7	2855.99	13077.3	25571	4950.91	10524.7	6294.89	9475.81	16347	17313.7	6912.8	11906.5	141.627	14853.4	11034.1	13800.6	16872.7	21121.1	4992.29	8839.84	903.631	6257.63	5504.04	18595.6	13071.6	9389.44	5083.97	5471.57	10794.9	15398.1	15336.6	8432.12	6964.57	8068.96	6203.86	7836.23	15057.3	5671.03	10919.3	3562.41
O15047	Histone-lysine N-methyltransferase SETD1A	SETD1A	1	1			221.8	376.37			592.153	410.818				284.35	180.681	499.148	1079.5	429.381	214.124		947.066	1106.88			2164.01					707.011									2523.23		1933.96
O15050	TPR and ankyrin repeat-containing protein 1	TRANK1	8	8		1243.22	859.913	285.837	680.275			530.643	437.496		29.1932		562.388	1279.26	3834.61	328.906	485.656		451.608	183.071			959.184				1	856.126		1		1189.78		386.686			1198.85	149.035	1	1	686.457	1.54401	132.751	226.642
O15056	Synaptojanin-2	SYNJ2	1	1		1638.42	853.405	1753.03	2050.17		1146.34	169.474	5176.97	1947.4			1240.12		2144.06	1675.45	1335.07	2703.6		609.345		710.193	1807.14	1563.5									2100.57	323.083									2619.58	1224.83	3681.65
O15061	Synemin	SYNM	30	30	4685.74	6570.13	6026.96	2917.21	2531.43	2276.12	4585.68	8229.65	10735.2	43289.6	80405.9	7518.18	2216.66	2972.04	1282.88	5991.12	3581.16	20527	7605.71	3047.63	67180.7	50196.9	10933.2	8052.57	9903.68	4968.65	5144.08	1015.61	2283.04	2676.36	5183.45	800.867	1686.11	858.509	25555.8	387.329	2535.1	15813.3	1859.88	3191.27	13331.2	17447.7	4105.44	2738.69	1875.54
O15062	Zinc finger and BTB domain-containing protein 5	ZBTB5	1	1		6524.16					7620.39	836.447		15472		781.238									916.233			6294.26	560.302			351.261	2113.62	3101.15		1434.87	1240.83		3585.8				893.303		2189.66	1320.33	1161.27	469.358
O15067	Phosphoribosylformylglycinamidine synthase	PFAS	22	22	8405.82	4675.14	3980.15	3524.95	3597.21	13059.1	8858.56	3993.09	11317.4	4259.86		6979.53	4546.14	4597.7	11933.2	5675.93	7133.1	5615.22	21594.8	4778.37	4174.34	1.8265	8771.34	4939.11	4714.87	10575.6	7562.04	4744.62	10858.7	3234.62	3587.62	7811.48	4486.44	9118.49	3227.78	9279.51	1333.66	2571.75	2453.71	2152.52	5441.75	5905.6	3372.68	2769.4	3480.09
O15069	NAC-alpha domain-containing protein 1	NACAD	5	5	2323.45	3912.87	2079.84	2694.98	9937.23	204.007	437.371	1664.17	6754.91	14204.4	35124.8	1879.7	1586.87	267.35	1586.78	3386.88	1145.97	14625.5		914.725	22679.9	5510.93	2915.9	4018.48	9320.87	4578.07		841.187	75.4964	89.2184	13832.8	126.42	4451.91	624.836			548.292	179.032	2057.6	4692.35	17168	1.52254	4304.93	5380	14321.5
O15075	Serine/threonine-protein kinase DCLK1	DCLK1	11	11	2003.9	3955.46	2453.72	1630.61	14786.7		1707.32	1254.83	2493.59	14024.9	13.6866	2662.93	1443.71	1082.28	1111.01	1632.03	990.561	7550.91			21856.6	10996.2	3018.76	2154.37	8538.53	7649.1	256.83	2029.66	1361.87		863.428	232.571	3886.87	2824.04	898.53	1086.86	1066.03	1677.89	2148.3	1101.17	12097.5	9203.21	8280.43	12921.2	8915.6
O15079	Syntaphilin	SNPH	5	4			265.033		2768.63							144.136				271.002		3467.49			1359.52			245.077																			569.315	769.241
O15083	ERC protein 2	ERC2	3	2			308.343		2605.35							185.151						1395.27										947.405						641.805									1100.81	509.595
O15085	Rho guanine nucleotide exchange factor 11	ARHGEF11	8	8	1106.77	1063.3	2333.16	382.588	6940.85	1365.23	2569.79	1079.56	3067.04			576.691	456.089	867.671	405.287	716.358	218.604	10685.9		1662.64	585.157		2509.42	2086.29	988.987		9526.71	457.734		623.983			598.676	406.147				383.502	135.605	942.058		1	779.8	581.747
O15091	Mitochondrial ribonuclease P catalytic subunit	PRORP	1	1	201.113	1367.2	1989.47	580.899		1104.63	254.624	2132.25	2041.35			404.07	710.396	2236.99	1046.05	259.915	386.601			178.229			758.55					59.6876									962.02	191.218	594.239				155.883
O15116	U6 snRNA-associated Sm-like protein LSm1	LSM1	3	3	13014	4303.3	4805.2	8519.03	7249.09	23098.6	10635	5124.52	7619.94	15407.4		10513.7	6596.99	7685.94	8052.14	11306.7	6283.41	13454.2	24221.5	7875.86	4899.56	6769.13	6632.56	7646.78	10348.9	8949.63	6739	6238.54	16550.2	16866.8	48114.1	11051.2	8724.4	14477.5	7758.71	8079.57	5433.04	2885.12	3702.3	9442.05	8127.42	8866.25	4046.96	8180.61	19036.4
O15117	FYN-binding protein 1	FYB1	3	3	923.934	944.499	181.406	504.202		262.476	1612.72	390.85		707.07		1002.87	900.607	1288.59	651.422	1572.54			709.698	691.312			6325.92	1616.36				243.507	400.57	1001.06	2142.69	648.314	298.494	828.475	2213.08		162.931			1393.14	658.492		345.135	60.1991
O15118	NPC intracellular cholesterol transporter 1	NPC1	2	2	8162.01	3743.88	7506.39	3699.46			5011.09	5499.87	9435.18	29373	102232	1847.33	1578.26	2777.02	2824.54	3353.6	2272.14	1995.15	10718.5	7035.36		18221.3	6882.93	5416.46		9913.43	3352.09	2869.76	5937.4	5579.38		3554.51	4788.35	448.232	54803.6	70161.1	4146.21	3973.79	1858.57	8428.44	8120.7	13168.9	3686.82	3731.93	27023.4
O15121	Sphingolipid delta(4)-desaturase DES1	DEGS1	1	1	163.787		181.527	595.178								495.316	152.661			274.351	198.885	542.264										173.725				277.536	670.333	494.827			645.882		389.792				582.8	240.938
O15126	Secretory carrier-associated membrane protein 1	SCAMP1	2	2	331.511	70.8265	1	278.369	3018.92		386.78	171.547	282.765	431.342	19.5941	675.073	173.963	488.966	102.439	96.7725	10.3103	1149.19		1	1668.94	920.913	1	630.523	1184.6		217.241	628.768	218.878	188.661	22.7626	134.793	321.788	1			257.184	117.386	386.774	1	380.72	112.795	405.903	1793.41	828.629
O15127	Secretory carrier-associated membrane protein 2	SCAMP2	3	3	7277.32	2671.34	2665.93	5674.69	790.539	7238.4	5692.39	4261.9	4746.48	1669.71		3872.9	6993.24	4015.85	5998.59	10974.6	6829.09	4091.18	15743.4	3893.62	1127.94	5590.73	3245.12	5101.69	1690.3	7533.96	3476.25	5398.73	13090.6	8441.29	5835.44	3508.84	3553.66	7287.38		2385.09	10859	5453.56	10420.5	4600.31	4456.17	5199.35	2687.81	1986.74
O15143	Actin-related protein 2/3 complex subunit 1B	ARPC1B	9	8	8009.92	10739.8	7991.13	10874.4	1342.64	7799.97	8511.55	10184.2	24697.1	9006.03	20408.3	4403.51	6916.18	12538.2	7381.59	5534.42	8378.31	2263.1	13862.6	11433.4	19508.5	20904.3	11617.2	8087.22	14506.4	11529.2	11429.1	5885.45	18052.8	16708.4	51359.8	13918.9	8837.49	10721.4	43896.6	19152.1	6574.68	5935.44	10860.3	15693.8	8956.11	122683	3778.57	1899.84	11324.6
O15144	Actin-related protein 2/3 complex subunit 2	ARPC2	14	14	22288.3	15372.1	17811.2	22738.5	17593.7	40286.7	25731.9	25962.7	17895.3	25056.9	79033.2	12283.8	19796.7	33725.1	21968.9	21447.7	22324.7	20630.6	40955.5	15943.7	21962.6	36138.9	15876	14380.7	31943.5	30046.7	31866.1	25476.6	30947.5	51825.6	84965.2	33127.2	25464.5	40472.3	70212.2	56803.4	20294.4	26853	32955.7	31512.2	28428.8	62406.1	12463.2	16058.2	38742.4
O15145	Actin-related protein 2/3 complex subunit 3	ARPC3	5	5	4938.85	5738.37	5996.74	3676.25	7023.73	8471.22	4951.05	4861.09	8399.15	14573.6	167536	2624.61	3255.29	8563.95	3828.34	3228.56	5801.98	15098.3	7894.95	14819	6142.22	22833.6	6795.73	20879.2	6453.4	895.721	6304.22	4508.7	19141.7	5233.36	15758.2	5267.37	3204.12	3830.56	5860.04	12483.8	3532.56	2662.49	1479.46	5489.42	6310.8	665.958	895.616	2543.73	1030.83
O15160	DNA-directed RNA polymerases I and III subunit RPAC1	POLR1C	9	9	11234.4	6022.44	10092	8867.83	8818.92	22578.2	7766.67	4512.51	15528.6	12602.6	185124	9598.91	8171.2	8733.55	9001.39	8934.77	10708.9	4637	41554.8	7510.82	21865.6	12451.3	12003.8	8129.97	11590.2	6801.55	7689.28	6127.4	16928.6	9861.01	32849.7	9320.78	5223.44	9491.92	13500.3	20415.1	6214.46	5747.86	8210.73	12309.9	10217.5	4969.36	3402.03	5684.72	10548.5
O15162	Phospholipid scramblase 1	PLSCR1	4	4	10608.4	2453.57	109.864	935.514	1	639.898	1652.04	665.089	103.177	5187.74		617.835	948.52	572.644	1173.84	3600.88	1719.37	3061.7	3489.09	1488.74			996.061	623.922	3046.46	1251.88	457.582	1101.2	1903.81	3627.72	5463.95	2522.01	2023	4409.06	1803.84	1028.16	2548.24	2872.02	374.362	3363.49	306.487		1174.9	772.178
O15173	Membrane-associated progesterone receptor component 2	PGRMC2	6	5	15644.1	12920.8	16481.6	13954.9	24903.8	15132.4	12148.5	11134.8	27265.3	12455.8	32039.6	14084.2	12410.1	13339	10013.6	12058.1	14543.7	40092.3	26918.6	18840.2	35934.6	14308.7	17493.5	17693.3	23461.5	15186.6	20979.1	12591.3	22679.3	19337.5	31067.5	16980.7	12219.8	10722.1	21438.3	23340	19792	12914.1	24867.1	18244	16716.1	23759.2	12876	30192.6	56457.2
O15182	Centrin-3	CETN3	2	2				1			1	1							1325.37					1							3227.83	1012.33	3769.49			1524.93		1750.24			1363.75		1010.01				1542.76
O15204	ADAM DEC1	ADAMDEC1	1	1	18502.8	10996.4	8529.96	9377				3303.19	8867.66				4717.49	5765.01		7352.74							3702.59	4971.78							5432.18	8726.39					591.062
O15211	Ral guanine nucleotide dissociation stimulator-like 2	RGL2	2	2	288.118	732.189	1220.87	1119.78			1556.56	238.955	1578.38	1		1089.7	1129.42	250.915	1141.25	1588.37	653.209	357.114	1730.42				1198.98	2750.19				416.521	539.298			212.44		550.44									394.618	731.688
O15212	Prefoldin subunit 6	PFDN6	7	7	20473.4	12775.9	16464.2	13442.5	28153.1	22938.3	12941.7	9421.98	22722.3	27554.5	115635	16990.9	23028.4	16981.7	22439.5	14289.3	14077.5	18914.1	33022	23572.3	37436.7	42755.3	21497.8	19059.3	20672.2	17669.2	13775	10126.3	16892.4	11480.3	29733.6	14182.5	11479.2	11125.5	24742.4	43788.1	7552.59	11653	11151	16037.6	16845.6	36742.6	11956.3	27478.8	65617.2
O15217	Glutathione S-transferase A4	GSTA4	2	2					1373.39							1085.79						881.722										1391.11																1012.44
O15226	NF-kappa-B-repressing factor	NKRF	2	2		1909.09	8794.35	8692.21	181.192	4946.75	1059.73	2023.63	6683.25			1614.29	5470.93	3488.33	4250.77	5456.33	4141.77		8318.94	1506.88			4977.63	936.408		2068.38	2364.35	1102.43				349.377	798.363	759.929			3202.03	977.714	2398.29				1349.09	367.733
O15228	Dihydroxyacetone phosphate acyltransferase	GNPAT	2	2	5236.85	6264.67	1693.9	2005.39	3037.01	17653.4	2863.88	1993.8	3855.54	4414.19		1095.76	1449.89	845.203	1574.73	544.675	1030.2			779.996	3673.45	4427.2		3751.05	20039.6		9067.46	884.992	16801.5	2353.46	40956.2	1132.77	11514.9	6541.71		5543.39	1040.34	956.412	8509.76			969.628	4000.47	2515.68	106788
O15230	Laminin subunit alpha-5	LAMA5	8	8	2081.82	1352.43	2442.02	3665.89	866.946	7058.23	2767.61	1773.22	5687.58			1935.39	4527.89	2227.06	2034.48	1513.84	4008.14	8818.29	11850	2617.22		4897.62	5884.07	4308.53	2870.05	1968.5		1279.06	9830.66	4214.11	1	3885.63	6244.63	4264.6	4582.29	1968.57	2758.41	1998.01	3556.33		628.958		931.994	947.402	1071.95
O15231	Zinc finger protein 185	ZNF185	4	4	2491.51	1331.43	6042.5	2866.39	313.65	11120	5400.35	2880.5	12961.4			676.383	2799.88		1170.58	4974.27	2228.14	1818.87	19618.5	2853.22			5668.34	3548.6			1276.66	825.422	2538.69	1307.54	3984.29	124.896		2893.94				531.808					35.1598
O15234	Protein CASC3	CASC3	1	1		250.138	635.492	807.739		405.843		275.251	844.677			210.325	516.842		1822.12		1417.82	1057.09		1			270.375					145.292	1			1					63.0619		165.72
O15235	28S ribosomal protein S12, mitochondrial	MRPS12	2	2		333.628	596.799	404.211		1	201.255	385.71				445.724	543.775	598.228	887.728		281.081	1									5.38632	497.726		1		790.114	419.741	1			1	94.8305	1	1			1	666.43
O15240	Neurosecretory protein VGF	VGF	18	18	5108.91	2192.58	12946.5	2995.85	61425	2744.19	2049.58	1354.6	11796.2	10728.9	66457.2	7178.97	1835.06	819.5	1655.42	3581.16	2348.44	11257.5	283.981	1190.43	44727.1	12450.5	4468.29	17614.4	19390.1	2314.34	285.398	4552.46	1219.47		775.94	825.861	3475.53	7181.77	4840.99	2.13967	457.683	752.644	1715.4	3287.38	3160.64	6714.59	3335.84	10326.6	34548.8
O15247	Chloride intracellular channel protein 2	CLIC2	8	8	1675.33	903.228	1935.85	2243.19		3415.04	3663.6	1058.18	7143.15	1866.13		687.771	1922.78	1463.58	1441.14	3519.62	1895.86	2337.02	1252.12	2177.93			2853.28	4720.51	520.236	5065.97	875.468	398.401	32.7926	1063.1	364.654	2121.48	341.205			2953.36	145.56	1013.28		3050.97			316.85
O15260	Surfeit locus protein 4	SURF4	2	2						8575.95					5205.41	981.914	1182.79	202.142		84.4296		79.4297						1507.34				782.233	985.505	3221.88			494.872				1196.48	424.511	348.562				527.151
O15264	Mitogen-activated protein kinase 13	MAPK13	3	3		999.627		262.971								500.787	2452.08	459.93			584.794			1			970.119										699.234					1
O15269	Serine palmitoyltransferase 1	SPTLC1	4	4	4925.48	2346.24	1982.4	2875.58	2967.52	3915.36	2204.07	2433.31	2450.65	2994.99	24.099	2026.23	363.636	1170.3	1173.99	3914.18	2439.5	4936.07	8251.29	1470.16		1.66015	2296.05	1705.59		1658.71	1565.85	699.757	1225.54	1608.01	23.377	2728.11	405.76	2683.13	2.10332	2570.4	3666.28	2950.98	2859.32	299.907	972.278		2268.06	368.266
O15270	Serine palmitoyltransferase 2	SPTLC2	2	2		175.337		183.14			154.278	129.496	207.764					258.877	328.778	330.6				422.086			323.558			452.988		254.316				157.243					1786.31	925.807	962.752				1023.58
O15273	Telethonin	TCAP	1	1																								370.479	330.521	3992.18								118.951	22900.1	4077.17		510.069	191.982			35664.5		443.895
O15294	UDP-N-acetylglucosamine--peptide N-acetylglucosaminyltransferase 110 kDa subunit	OGT	12	12	1962.78	3013.37	5478.41	4369.66	9753.07	3411.89	1921.99	3149.71	4437.77	3449.83	10913.4	2752.49	2428.35	2975.39	5733.93	3272.68	3834.03	3731.05	6952.77	3929.46	25800.9	2177.11	7143.26	3143.06	2346.27	3271.81	1964.93	2333.95	2157.2	1427.64		1375.03	3167.34	2751.38	1619.64	3711.62	3488.26	4017.34	5016.89	2606.45	2385.94	4086.33	3741.71	4754.8	6550.01
O15296	Polyunsaturated fatty acid lipoxygenase ALOX15B	ALOX15B	6	6	3279.92	363.13	1104.87	556.97		637.977	2825.79	637.92	1200.01			517.833	1139.26	727.138	962.105	646.228		2215.08	1576.38	1978.63				5627.38				123.286	1970.59	10850.5	2483.01		115.342				620.049
O15297	Protein phosphatase 1D	PPM1D	1	1				863.06		648.956						248.875	588.429		1340.1	461.593							2126.01														164.766
O15305	Phosphomannomutase 2	PMM2	8	8	781.307	2247.52	1616.44	2044.4	1120.73	3008.24	2162.16	2109.88	3741.96	532.475		1694.74	923.794	1935.23	2308.32	782.06	1771.13	1080.71	4108.68	2041.02		1.70424	1691.03	1282.16	6682.32	3743.61	12662.5	2969.7	8852.06	3419.32	5456.21	2989.49	1911.6	3275.39	3815.57	2767.65	3174.8	3262.54	6646.23	2870.3	1	2022.05	818.312	2460.85	1878.52
O15321	Transmembrane 9 superfamily member 1	TM9SF1	1	1								1136.71																													2918.39	3679.84	344.074
O15347	High mobility group protein B3	HMGB3	5	5	1832.38	3015.57	1622.7	2965.95	1557.4	12232.6	1934.98	5158.32	7838.26	3.88284		2588.99	7152.43	3767.6	5927.02	3481.48	3688.12	1503.54	16535.7	11208.5		2916.05	21512.5	8588.52	1364.56	1971.18	4481.22	2597.48	25169.6	9135.6		4255.3	1586.61	11427.5	7053.51		5295.93	9350.44	8499.26	6420.62	588.919	1927.51	930.47	2459.45	10246.1
O15355	Protein phosphatase 1G	PPM1G	9	9	2603.73	2411.4	3301.58	4520.63	453.776	7375.89	3001.9	2329.55	4710.38	3.07691	4027.35	4123.39	5078.4	4316.84	7401.59	2650.32	6445.16	18606.2	10553.1	5507.05		400.291	4820.61	2485.94	2876.56	8574.57	5010.87	4751.29	2750.82	1191.86	5027.42	5673.43	1536.11	4233.85	2831.91	4814.65	3508.62	2629.93	5423.08	3715.94	2174.88	1132.83	1253.7	862.15	1284.44
O15357	Phosphatidylinositol 3,4,5-trisphosphate 5-phosphatase 2	INPPL1	11	10	3811.86	2821.62	4466.54	4300.72	9706.68	7119.06	3507.06	2443.6	11105.6	5203.94		3116.19	3724.91	3940.42	2154.92	2578.8	3121.12	10839.5	20665.1	3056.21	1331		6147.01	4702.05	843.687	1067.96	1666.18	1502.67	2728.11	3508.95	7044.96	2135.79	1533.42	2387.73	3778.67		3821.72	2037.94	1745.6	969.353	1178.19	933.878	1010.71	846.457
O15371	Eukaryotic translation initiation factor 3 subunit D	EIF3D	12	12	6792.57	7595.31	6775.48	8732.73	3063.39	11321.6	5850.52	7395.05	12855.4	14362.1	84777	4655.84	7548.9	10450.8	12697.9	6917.16	12142.4	8487.5	19234.3	7071.34	26888.9	43648.1	10046.7	4940.39	12004.7	9999.69	6491.66	7386.82	6326.1	3209.37	18923.1	5749.43	5526.25	4979.3	15616.3	15378.3	5429	6073.76	8651.81	9338.29	11149.3	17094.9	4689.96	3214.99	8088.66
O15372	Eukaryotic translation initiation factor 3 subunit H	EIF3H	4	4	5751.86	5022.52	3172.79	6724.75	1883.18	14249.5	3612.56	3835.18	11260.5		7444.22	1188.83	6121.51	8200.46	13044.7	3026.13	8370.74	18346.3	12398.3	7424.93		924.262	12934.6	1628.03		10169.9	4550.31	5618	10236.4	3363.39		4301.48	3747.89	6165.46	1100.15		5346.09	2020.11	7187.99	3768.97	5050.86	2378.2	3748.21	2427.26	932.721
O15379	Histone deacetylase 3	HDAC3	1	1		1						1		1.47551		143.492	1	1		123.36	1										1.75271	243.257	1	201.794		1	1	347.232			383.497	115.587	1
O15381	Nuclear valosin-containing protein-like	NVL	4	4	308.258	1364.91	2807.92	1350.67		611.457	149.259	1277.51	6295			649.992	1170.37	475.55	1320.6	1525.79	1580.99		1417.01	1686.17			1592.92	2890.43		665.625	638.219	673.718	2.47465	624.18	807.305	1017.68	1822.87	628.605			1747.42	2799.44	1210.94	2.92393			947.108	2427.45
O15382	Branched-chain-amino-acid aminotransferase, mitochondrial	BCAT2	3	3	783.795	301.352	504.401	1399.85	1713.98	1994.63	754.684	1838.5				1029.29	1117.72	358.428	675.283	1237.71	1408.58	1398.09						515.849		1257.07	2414.1	533.913	1232.18	675.894	709	1251.18	497.913	549.213			1882.81	2085.94	1029.99				362.463	1661.03	551.111
O15389	Sialic acid-binding Ig-like lectin 5	SIGLEC5	1	0	11375.6	599.147		618.013												2651.07	473.144	512.547		167.898										547.426							473.934	305.022	187.57				151.375
O15394	Neural cell adhesion molecule 2	NCAM2	12	12	1583.57	871.781	2216.22	862.723	16320.5			639.92	1567.02	6896.68	17993.2	1400.21			166.35	1444.69	354.861	7299.85		214.071	13520.2	6662.13	626.221	2589.96	8852.95	1876.62	246.819	1633.5					1629.37	2729.79				1362.93	1233.87	638.256	3323.63	6730.15	7293.07	10741.4	20134.4
O15397	Importin-8	IPO8	7	7	4275.32	1486.66	655.789	1742.85		3078.93	2585.02	1842.03	259.355		8620.26	1121.1	1466.58	3121.37	1761.7	3567.33	2113.56	1773.71	4674.06	3057.16	1767.73		2370.13	871.66	1.66629		1001.16	2572.56	1670.48	1408.66	2069.95	3263.79	1350.68	2722.98	1202.55	5462.57	2091.88	2573.13	1011.08	332.863	261.672	3738.65	800.538	321.559
O15400	Syntaxin-7	STX7	7	7	15154.5	14118.1	18888.2	9253.34	23507.3	11487.4	11727.4	12328.3	24817.4	21538.9	149694	8535.44	10861.3	4745.33	7590.47	18304.6	11134.6	34511.9	44867.7	26683.8	38063.3	18168	24792.6	21754.9	14589.6	11799.8	10941.1	14753.2	19245.3	20984.7	19636.6	10076.7	13028.9	8218.95	22141.5	18659.6	21256.3	14707.3	16980.6	13625	10023.9	53057.9	13341	16804.9	39216.5
O15417	Trinucleotide repeat-containing gene 18 protein	TNRC18	1	1				3486.33				8529.77	2879.16	2006.02		558.677		1133.59		2848.36	956.436			1898.13		39907.3	5133.19					2932.56						1022.37				10205.4	20300		2673.04	5102.13	381.329
O15427	Monocarboxylate transporter 4	SLC16A3	2	2	9565.51	3362.55	1035.31	3021.9			797.027	3928.59	58.705			434.728	1208.67	6138.62	1195	4584.91	768.886	2324.39		1650.72		3757.4		118.324	1	2798.06	425.764	2606.22	3997.97	14651.8	6500.36	3256.94	741.163	4098.84	3440.38	944.855	5920.68	6413.07	2233.58	12495.8	3341.5	4910.86	2760.84	228.656	1.3472
O15446	DNA-directed RNA polymerase I subunit RPA34	POLR1G	3	3	2145.22	2354.72	8284.18	2818.1		11683.6	1102.37	4442.42	4889.6			5930.75	3049.72	3087.2	4006.29	1449.02	5246.15	256.925	8160.24	6041.57			4119.2	554.216	278.386	1420.83	2173.38	3289.66	15556.9	1880.08		3127.61	785.207	649.09		795.395	7049.81	1870.29	8328.78	1871.53			1290.7	4389.62	2165.98
O15460	Prolyl 4-hydroxylase subunit alpha-2	P4HA2	4	4	771.199	227.931	694.286	1361.77	248.185	171.43	758.475	1084.7	12091.5			638.491	1253.9	1643.61	1782.56	4701.43	1130.36			1530.46			2053.22	707.413		6906.12	882.678	560.965	303.362		1127.17	1450.5			5357	1749.12	190.891	653.115	442.495	729.292	1.29313	1.34324	198.62		1131.75
O15479	Melanoma-associated antigen B2	MAGEB2	2	2							1144.09									1033.61																											1360.93
O15484	Calpain-5	CAPN5	1	1	904.558	2716.7	325.264	826.38	8866.67		584.281	1737.07		5637.54		1428.64	152.891	86.7607		1506.12	531.307	7602.45			3430.73	6940.21	254.537	1204.03	3632.41	8305.39	1109.46	1451.34		3142.13	1430.2		2736.8	2253.2			2394.38	2592.57	1639.55	2783.33	12135.6	3113.75	9743.95	13451.8	6654.84
O15498	Synaptobrevin homolog YKT6	YKT6	5	5	5748.93	2001.77	990.147	2344.33	4706.23	3941.73	2110.33	3012.44	2675.16	9510.96		1366.74	769.509	3862.48	1292.81	3109	498.706	3436.21	5108.8	1557.2	12432.9	15321	2323.31	1351.41	5073.78	17075.9	3236.68	2332.93	2758.71	11972.7	9413.43	2240.07	2375.75	2835.68	5039.49	4222.93	2849.26	2730.09	2183.56	4397.69	5891.47	7423.11	3270.97	4604.49	5195.91
O15499	Homeobox protein goosecoid-2	GSC2	1	1		1							1689.84	986.154					1				1				563.553	571.907			1							29.0305				1		1			1	1
O15511	Actin-related protein 2/3 complex subunit 5	ARPC5	4	4	96854.3	32916	76225.5	76662.4	29859.9	119687	91624.6	47517.9	110815	63256.3	1.38847e+06	37539	50212.5	61041.6	57045.1	45171.7	46786.2	55164.8	125267	53924.4	211614	227506	75263	67716.5	99863.1	70547.1	79732.1	43948.4	155684	153611	282684	78402	39987.3	68077.8	134557	79313.9	30908.6	36218.9	68779.8	75432.5	76553.2	227011	25780.7	30500.2	122646
O15514	DNA-directed RNA polymerase II subunit RPB4	POLR2D	5	5	7919.84	4991.68	10648.9	8991.91	3587.59	22836.2	7301.56	6357.44	16962.6	4887.87	149026	8273.43	8683.88	9906.64	15744	11182.6	10731.2	7028.4	46363.5	11664.7	8039.91	16951.6	17373.4	13958.6	4774.85	8435.24	14167.3	6739.03	19063.9	7660	15106.3	10084.6	6087.88	18937.4	23053.7	51309.2	7262.43	2825.27	6643.47	10626.7	5272.62	15027.3	2564.66	4117.38	18470.6
O15519	CASP8 and FADD-like apoptosis regulator	CFLAR	1	1	268.07	1496.47	237.867	575.387		1122.2	188.097	240.039				1756.77	991.908	144.793	420.513	379.809	881.393	364.218	6053.19				1409.03				104.097					98.4712	744.151				1810.22	2004.21
O15523	ATP-dependent RNA helicase DDX3Y	DDX3Y	2	2	485.984	685.9											1491.57	2164.73			165.727											1															125.217
O15527	N-glycosylase/DNA lyase	OGG1	1	1		4813.44	8933.52	4704.34		5532.19	411.435	5044.09	12304.5			2684.15	12016.3	2901.94	6402.1		6856.9		15607.4	5815.05			11643.4	5215.99					1610.24			3087.01		1355.26		1489.31	2637.95	4582.14	7016.78				5254.07
O15530	3-phosphoinositide-dependent protein kinase 1	PDPK1	2	0		202.212	641.481	95.3503	2882.45	2247.65						318.187	176.646	287.202	359.942	690.392		462.284			3.43997						252.809	515.603					457.113	124.645			425.013	396.097			225.488		1151.52	1705.44
O15533	Tapasin	TAPBP	6	6	25512	14359.5	8826.13	12150.8	1035.64	12831.5	14142.5	14261.2	10060.7	18974.9		3685.72	21503.5	4196.78	8871.63	8289	5396.63	4028.78	6997.64	60755.1	27982	22576.1	28001.3	10892.9	4450.52	10843.5	1255.28	9262.25	25288.1	31944.2	28991	6928.78	2662.51	9366.99	34344.5	4566.48	27794.1	26169.7	4471.96	37509.7	18064.7	12311.6	5984.88	1223.78	4895.87
O15540	Fatty acid-binding protein, brain	FABP7	5	5	13686.1	4778.86	23404.6	6035.49	46432	8805.64	27901.3	4494.01	19420	129551	16851.4	50591	9613.55	8348.87	7513.4	28427.8	7536.55	14788.7	949.98	2513.48	289244	16154.2	8416.64	29374.4	144499	38287.3	28107	6792.78	17884.9	17889.4	48183.4	1293.03	18188.7	27639.6	64431.7	10305.5	2743.2	10560.1	8681.83	5385.72	49457.6	46154.1	13123.9	33548	103119
O15547	P2X purinoceptor 6	P2RX6	1	1			1126.62	1416.49	3467.4	1		293.126	711.201			574.787	449.148	158.288	235.459	1	212.365		1086.3				260.374		628.041		445.738	340.158	474.385	1495.19		910.088	5281.56	5777.24			444.363	332.36	1808.35	22.6117	296.504	1.17363	1322.89	3829.28	28735.9
O43143	Pre-mRNA-splicing factor ATP-dependent RNA helicase DHX15	DHX15	19	19	7705.96	7172.36	5500.91	6729.35	2508.64	8424.33	5141.86	8671.26	11470.2	10990.4	43803.7	4415.85	5234.86	11571.8	6664.78	5614.06	9774.72	3663.87	4929.02	10782.8	8411.8	30039.1	15441.7	5166.9	3929.24	8458.78	7680.08	7041.36	9644.71	7587.44	9337.44	5559.28	3675.75	6281.25	15681.6	20459.5	12151	10129.5	13348.4	8547.8	9232.04	15324.7	5022.33	3637.68	4133.16
O43148	mRNA cap guanine-N7 methyltransferase	RNMT	8	8	1858.63	2574.9	2467.91	1630.22	2362.3	5781.55	1386.35	2355.8	2530.56	714.073	3409.24	1899.09	2887.99	3769.28	1657.7	1667.89	4152.07	548.97	1706.72	1844.69	1072.83	1218.58	3196.25	1013.76		6748.06	1262.46	1441.14	2112.19	1851.68	2285.98	1216.15	1551.7	1739.45		3621.53	2839.97	3169.4	3259.42	4106.54			1441.45	2189.56	590.821
O43149	Zinc finger ZZ-type and EF-hand domain-containing protein 1	ZZEF1	4	4	5295.78	876.689	1787.77	1018.88	3060.45	3127.63	1994.5	687.678	3411.17	1619.48		1702.48	1436.55	1524.23	1658.74	2041.59	1269.8	2800.97	6768.41	1526.3			2774.5	5474.86	1964.58	678.422	560.329	929.301	353.222	1344.76		550.486	790.523	1380.69			880.408	788.478	664.014	1	113.256		780.699	818.497	992.47
O43156	TELO2-interacting protein 1 homolog	TTI1	7	7		986.759	10245.2	641.169	382.254	247.763	384.606	13901.3					1871.23	567.602	1063.6		3496.27			2539.92			217.724				32749.5	12462.6				382.767	179.987	263.758				6053.25		667.041			1908.49	1940.88
O43157	Plexin-B1	PLXNB1	9	8		1815.39	1659.16	1107.94	5271.13	2494	320.342	21.4217	3225.48	3404.96		1038.87	502.259	284.895	280.521	3888.96	217.462	2933.28		1	3650.76	3955.92	567.372	2223.12	2425.43	1412.05	1	92.9158		191.883		1	344.704	330.197		35.93	179.712	36.9946	1304.77	1	11217.5	9393.86	2975.38	3035.73	1297.16
O43159	Ribosomal RNA-processing protein 8	RRP8	3	3		1248.46	3586.99	2487.83			1183.8	1396.29				1000.56	1229.52	2851.18	988.62	3620.36	986.579	1	2771.6	1039.38			486.905			765.404	1277.77	2642.92						693.71		760.873	3397.63	2103.17	2177.69				769.003
O43164	E3 ubiquitin-protein ligase Praja-2	PJA2	1	1		421.806			2308.19				231.992			472.518	405.895		588.93	330.637	289.428	637.11	84.8008					523.337					1198.58			321.626	327.91	711.408	292.391			182.637			1910.97		253.661	944.183
O43169	Cytochrome b5 type B	CYB5B	6	6	40842.9	15207.3	59445.4	40689.1	48611.9	21441.4	16566.3	17059.3	151710	39287.3	265741	24472.2	26217.9	16065.5	25706.8	28169.3	41722.6	249085	71073.7	19315.5	106912	39544.4	51388.6	17100.7	68126.5	19610.8	54485.1	30227.4	48203.8	41906.4	59921.8	32276.2	34694.2	45331.9	55656.8	42822.4	46713.8	29283.3	53645.9	36187.8	30144.5	43564.2	30237.2	57221.4	186875
O43172	U4/U6 small nuclear ribonucleoprotein Prp4	PRPF4	7	7	5969.74	4526.72	5702.58	6672.42		9531.86	2663.44	4258.96	6875.5	4074.53	18421.2	3591.61	3943.87	5496.61	3378.06	4848.55	5019.48	1727.05	12721.6	7140.41		15534.3	9102.67	4431.98	985.411	5588.1	2969.69	3812.76	2937.52	4017.19	853.223	2868.34	1916.49	5735.37		4867.83	5265.01	3893.76	5863.54	5890.43	2852.21	1983.7	1903.39	1964.68	2157.76
O43175	D-3-phosphoglycerate dehydrogenase	PHGDH	18	18	13157.1	9069.68	9056.47	3717.88	25316.7	17382.2	7215.97	4527.47	7817.64	31267.1	105716	6759.84	8199.12	5448.99	47602.1	3399.61	2398.07	28583.1	2176.78	6498.56	17389	28273.4	14787.1	5443.78	5735.85	8334.2	564.13	11476.5	5906.99	1914.54	5036.63	12890	11814.2	17111.9	12443	6135.39	3974.83	4398.14	2044.17	3744.71	19413.5	96557.1	10808	24018.9	37808
O43181	NADH dehydrogenase [ubiquinone] iron-sulfur protein 4, mitochondrial	NDUFS4	1	1	4996.88	2298.36	2782.29	1647.82	14820.1	1050.55	2189.05	2916.92	3718.24	9379.54	130.89	3291.93	2161.82	1204.86	2451.11	976.443	2419.15	7050.1	634.663	3196.17	10067	4330.18	1263.16	2324.42	8012.22	190.852	35.8933	2388.49	1692.2	1874.03	1.91007	1605.79	2566.82	691.625	343.123	559.376	3083.05	2017.28	3452.75	3984.93	5006.33	5.06519	6586.06	29345.7	47533.8
O43236	Septin-4	SEPTIN4	9	9	246.505	769.005	605.234	1790.2	4510.49				5934.2	18044.1	9052.96	565.883	2026.24		743.716	1104.07	821.006	59829.8			2098.77	25880.9	10945.8	780.951	13080.6	3392.74		91.2272					3833.83	1			402.126	172.838	1056.56	1242.19	11431.5	6426.64	6246.62	10035.9	10188.7
O43237	Cytoplasmic dynein 1 light intermediate chain 2	DYNC1LI2	9	9	6693.95	4955.65	4258.93	8523.1	19118	9711.49	8427.92	6316.31	19090.3	49377.8		5959.53	5582.49	5534.03	830.709	10989	4439.46	11651.2	19968.3	6419.94	42749	10067.4	8071.83	12521.1	23703.1	14913.6	9081.94	6748.72	15381.3	22511.1	52293.5	7264.75	7004.97	4755.1	62220.5	10617.2	3449.65	3601.53	2484.19	7293.15	21961.6	23969.8	8812.06	11768.7	26008.6
O43240	Kallikrein-10	KLK10	2	2	637.314	426.761						339.362														52772.2					561.233						192.316		5795.82	13843.5	277.177	4014.37			12265.5	3020.92	191.248	791.911
O43242	26S proteasome non-ATPase regulatory subunit 3	PSMD3	15	15	3803.48	2522.53	1727.81	5116.07	2379.54	2254.04	4005.94	4055.61	4399.01	906.596	2716.48	1486.88	2885.52	4414.79	4219.53	3244.7	4442.24	1381.84	2487.36	1717.86		950.212	2132.33	1513.48	3077.55	4998.46	3593.61	3173.93	3570.86	3759.39	5372.58	4078.87	2698.06	3894.79	6773.79	7448.49	3667.74	3505.85	4038.07	2510.06	3773.24	1635.54	2739.32	1775.54	3056.24
O43247	Testis-expressed protein 33	TEX33	1	1		1	82.9109	1	1		179.45		169.634	1.59637	29.675		36.1802					73.4135	1	1	1.78839			1									1
O43251	RNA binding protein fox-1 homolog 2	RBFOX2	3	0			778.039		6161.06		1041.18	937.763				1765.83		1277.79	1801.62	470.781		4258.39			8045.95		1007.35	1369.22	1605.9			947.994					514.645				121.201	1336.69	1			795.553	309.66	4527.78	9956.99
O43252	Bifunctional 3'-phosphoadenosine 5'-phosphosulfate synthase 1	PAPSS1	13	12	563.027	1532.59	3077.47	1728.6	6854.3	1480.3	1326.72	1776.44	6928.41	796.761	11925.9	1198.26	3044.5	4255.16	3059.62	2889.9	2854.78	793.689	919.386	3081.9		4601.94	4979.04	3053.83	2978.38	3232.81	2867.32	2105.49	3882.76	2111.38	4140.01	1607.09	2962.23	1649.39	7878.64	5758.11	2337.63	2226.36	2730.06	1456.86	1557.92		3469.91	6164.89	16611
O43264	Centromere/kinetochore protein zw10 homolog	ZW10	5	5	3701.68	837.809	1536.87	1584.73	161.299	3165.09	1312.59	846.767	3096.12			800.979	1925.71	1837.17	1907.35	1215.52	2050.69	923.572	2107.91	1067.07			6570.37	4747.77	1	8812.91	1564.55	3881.41	6135.75	1309.11		633.465	1199.82	995.134		7469.03	3372.26	1193.35	2720.91	1486.94			1422.47	541.856
O43272	Proline dehydrogenase 1, mitochondrial	PRODH	1	1		278.593	676.175	541.955	2975.26					4215.55		845.203						1651.34				1874.06		1001.97									314.396										878.104	1709.19	509.429
O43286	Beta-1,4-galactosyltransferase 5	B4GALT5	2	2	8897.2	3248.52	1111.88	3168.62		4503.3	984.331	7632.77	7576.32			3614.86	2322.54	1870.56	983.892	4646.49	5489.52	2053.66	5096.02	7634.07		7521.11	5775.85	3325.79	2774.88	5389.28	2658.87	2687.28	2206.99	6275	8534	5867.82	1055.67	1666.51	5082.54	16498.2	10355.7	10755.8	25867.5	5492.67	3815.12	4977.47	1438.7	405.973
O43290	U4/U6.U5 tri-snRNP-associated protein 1	SART1	10	10	2728.51	2367.14	4902.02	3557.72		4972.67	490.829	2052.06	10072.1	1		1539.54	2855.17	2877.91	2071.87	5387.35	2377.94	7228.28	4593.05	2221	2155.24		6917.88	3249.5	3420	2864.06	2526.04	1615.59	2511.05	1269.58	6083.3	662.375	443.382	1160.97	179980	137461	3435.16	3795.17	4060.4	19265.3	21576.1	74755.5	1117.93	14070.2	9452.6
O43294	Transforming growth factor beta-1-induced transcript 1 protein	TGFB1I1	1	1					325.28				1983.82			357.866	708.6	976.983		307.462				710.349		533.275	232.281	1253.87																			1068.64
O43295	SLIT-ROBO Rho GTPase-activating protein 3	SRGAP3	9	8		410.215	1401.99	515.888	6487.57		349.498	1	2233.27	198.882		834.862				200.942	835.44	745.475		8484.9	10471.6	2.42336	1	1101.36	1261.17			207.97					592.322	285.156			333.713	294.225		1	235.74	1.56646	825.911	1467.93	2234.8
O43301	Heat shock 70 kDa protein 12A	HSPA12A	20	19	1822.77	9619.18	6994.39	6236.1	48608.8	2361.9	1921.74	4043.3	11213	95314.6	349056	6754.37	1208.63	768.44	5222.61	6012.13	3995.07	74070.2	287.197	5258.05	124107	68994.6	4886.13	8613.58	35306.9	14206.5	68519.9	3190.7	635.933	994.135	1429.8	516.577	17623.7	5306.65	5888.95	4110.01	2677.76	3784.56	8176.5	6848.87	58272.2	40547.7	23952	43677.5	81353.3
O43314	Inositol hexakisphosphate and diphosphoinositol-pentakisphosphate kinase 2	PPIP5K2	3	2	915.757	395.931	1489.82	892.74	1611.98		1388.82	539.296	1469.67	314.447	33.4199	1246.44	1341.46	1120.36	541.147	701.354	754.379		337.13	219.788		2507.1	2380.38		1.25762	232.236	162.79	340.136	280.373	583.719	2.12532	146.083	582.37	409.683		1.35912	384.008	313.247	305.711	204.048	4411.68	1543.57	604.516	1079.81	1
O43318	Mitogen-activated protein kinase kinase kinase 7	MAP3K7	2	2	301715	7344.47	2962.94	1499.01	24445	374619	91346.7	9212.17	1261.72	27719.3		2156.29	6940.45	17032.4	680.545	13568.3	38184.2	1416.23	2175.77	10461.5	1777.6	9342.14	2421.61	21544.7	61625.7	1.7403e+06	122399	52084.9	37072.8	4838.56	684398	6581.48	885.347	27117.6	97709.2	574965	36954.2	8285.36	5621.75	126379	376121	6816	14256.8	14396.2	49085.7
O43324	Eukaryotic translation elongation factor 1 epsilon-1	EEF1E1	5	5	7938.55	5808.51	8015.49	7698.73	3718.77	5854.8	4739.55	4836.03	6564.4	2277.42		5526.11	7552.9	6776.29	6808.79	4931.17	11659.3	2563.06	11478.4	7220.48	7885.64	4241.26	9022.19	3861.43	7653.99	3382.44	6728.15	5543.16	11047.2	5924.97	6497.99	7314.61	4899.97	7640.12	4853.89	2806.93	5117.47	4404.1	7020.32	7274.23	4471.4	2864.1	3710.56	5053.82	11995
O43353	Receptor-interacting serine/threonine-protein kinase 2	RIPK2	5	4	4057.73	493.226	1812.75	1000.61	3245.58	2775.66	710.965	340.993	2156.37			1015.26	1702.37	388.826	247.92	2013.49	1476.94	1910.78	2779.43	725.672			1699.62	2207.7				424.334	1593.32	4042.46		1039.53	677.552	1271.06			809.308		1452.14				771.145	939.624
O43379	WD repeat-containing protein 62	WDR62	1	1	758.773	34.7439	149.815	167.894	470.565			1		2.46106		257.003	381.564	261.259	18.5456	1	559.562	624.047	20.3655	539.376	861.153		323.467	174.279			208.965	98.9621	11.9498			114.017	115.984	95.6728		1.42683	1	86.8313	409.275	1			61.5021
O43390	Heterogeneous nuclear ribonucleoprotein R	HNRNPR	13	13	14482.1	25975.4	16409.6	9252.6	11564.9	13693.6	6105.32	27092.4	17963.6	14241.8	115346	7861.26	15288.8	26536.9	15208.9	6292.25	17710.5	8863.73	24542.7	26070.8	18766.4	28344.3	21296.2	11519.5	6361.48	20117.3	12228.8	12457.7	8286.53	5453.26	14762.2	12231.8	5708.81	10732.3	15504.8	23977.3	23726.5	17906.1	26713.7	12390.8	9778.12	14433.9	9717.76	6376.73	10373
O43395	U4/U6 small nuclear ribonucleoprotein Prp3	PRPF3	10	10	4028.01	3393.16	6233.73	7762.7	16875.1	6163.82	2229.86	4097.44	15053.9	3099.01	81496.5	3416.91	3508.15	5314.59	4282.66	3493.05	4260.14	3809.23	12143.1	5246.27	88943.1	14512	11836.1	7665.02	890.382	3183.57	2882.29	2475.29	201.693	1274.9	4900.49	1566.41	524.2	1242.25	1502.11	5309.63	6071.71	4522.34	5619.16	1350.65	2182.22	513.641	1904.98	4425.41	21147.3
O43396	Thioredoxin-like protein 1	TXNL1	12	12	16795.9	9683.47	11289.8	10904.7	20634.2	22377.8	6751.8	8410.76	28878.7	22606.7	133655	7325.5	14381.5	7880.17	7060.73	14466.8	13185.7	14402.1	18508	8932.91	21200.3	23084	15613.3	15800.8	14101.1	14917.5	6211.96	7054.15	9757.08	7680.79	12471	6503.11	5833.79	9643.98	16260.4	26838.5	8038.05	6666.44	5859.87	12636.8	13211	19028.8	5863.95	9850.33	23317.3
O43399	Tumor protein D54	TPD52L2	7	7	29990.4	20021.1	21968.2	16692.8	30899	38835.6	31659.2	17152.2	42069.1	33245.9	216593	24459.9	21855.8	11590.5	25107.4	25159.1	19004.5	42100.7	88075.7	37024.6	41180.2	33392.3	32393.6	49555	44344.6	25461.5	25679.1	17409.4	59849.9	59018.7	121096	24124.4	39321.2	37465.5	49675.9	26991.1	24264.2	16694.5	26078.9	51720.8	34437	41828	24315.2	42599.9	106222
O43402	ER membrane protein complex subunit 8	EMC8	3	3	8580.85	2734.81	2521.64	5003.29	3042.61	3887.51	3667.83	291.55	11213.8			3088.04	4091.71	3308.79	1326.53	2252.73	3562.98		6645.44	4517.58		571.63	6322.69	3712.19	946.597	2146.86	3036.62	687.335	1224.35	1517.02	1181.92	1012.93	970.418	804.865			1103.82	1596.93	220.904	1752.09	714.125		893.239	1392.6	6130.6
O43414	ERI1 exoribonuclease 3	ERI3	2	2		506.075	1308.57		3645.02			507.666	548.746	843.587		350.742	545.142				325.284	1074.61															1167.2										719.594	1879.38
O43426	Synaptojanin-1	SYNJ1	16	16	985.146	1574.62	1834.61	1000.72	16553.7	955.868	831.561	1584.45	3539.88	9096.31	98601.7	1697.12	1240.62		644.37	1699.05	2533.21	4961.53	4724.16	954.143	22008.3	5001.79	1339.98	3694.05	11739.8	2596.93		1490.57		1327.68			3287.52	2393.74	1373.61		474.39	1514.17	908.511	1268.91	9362.79	4028.4	5704.54	7211.94	11823.1
O43427	Acidic fibroblast growth factor intracellular-binding protein	FIBP	7	7	3430.48	3496.08	1969.46	2101.97	4799.56	3304.15	2267.47	2037.87	2303.71			1984.01	1907.03	2478.36	2254.87	2328.94	2495.2	3600.41	2353.53	2729.49	12152.8	1661.49	4670.82	1989.3	4473.3		2337.68	1586.6	4128.81	4881.82		2276.17	2655.44	2785.3			2340.36	1558.11	2983.29	1275.26	985.026	857.829	2599.43	3385.41	5746.04
O43432	Eukaryotic translation initiation factor 4 gamma 3	EIF4G3	12	11	3847.72	3332.77	3021.9	3859.23	3772.7	10373.9	2082.45	1873.4	4374.91		14327.5	1408.95	1711.96	3757.96	3557.47	2392.48	3573.85	4507.98	2203.94	1966.81	7075.72	5441.94	4819.46	2558.86	1776.77		3499.91	2276.11	1557.68	4362.2	4941.11	2090.24	1465.16	4550.93		1.36252	1427.81	6135.28	1853.45	828.901	1290.2	4140.66	1776.55	1381.42
O43447	Peptidyl-prolyl cis-trans isomerase H	PPIH	7	7	14072.3	9036.85	6693.25	5847.36	7185.69	14828.4	7259.3	7442.05	7441.84	6934.81	47308.3	10903.2	13522.8	15746.7	7112	4631.85	4803.87	3745.69	31862	9871.67	4897.68	8048.97	9388.26	7898.42	9647.56	12075.2	19953.5	12999.4	17661.1	11025	22539.5	13840.1	7472.31	12981.7	19741.2	25352.8	12259.1	7512.1	14568.5	12963.7	5478.95	18233.7	6744.83	9402.35	18386.1
O43451	Maltase-glucoamylase, intestinal	MGAM	7	6	10132.2	170.936				4174.71						7262.84			659.589			10336.8					1107.02	4379.85													1540.85	569.135		1
O43464	Serine protease HTRA2, mitochondrial	HTRA2	3	2	14579.3	2308.55	3740.36	5369.21	7831.45	2759.59	3067.8	4555.35	6559.81	5777.4		3905.81	2913.22	2223.42	1774.53	5539.55	5040.35	10542.2	8528.71	2447.32	12856.8	3963.31	10418.8	6280.13	6298.77		3477.34	1650.16	3560.21	6099.9		2024.74	770.13	866.738	4472.76	2672.61	1005	3390.82	1520.37	3698.96			2803.17	3161.29	3058.15
O43488	Aflatoxin B1 aldehyde reductase member 2	AKR7A2	5	3	4898.25	9688.8	7627.65	7306.8	26184.3	8872.22	9158.84	8833.77	26716.6	22058.7	79348.7	6934.77	7076.78	9926.04	9994.87	9238.44	11441.2	10199.3	12737.7	10390.5	39915.8	22226.9	13581.5	15612.2	16900.6	1677.34	11207.1	10188.3	8371.9	5936.89	9036.84	14959.5	7702.08	10302	18886.2	3734.43	5773.95	5118.16	18711.7	9241.1	21457.4	21656.3	11066.3	18080.6	41881.6
O43491	Band 4.1-like protein 2	EPB41L2	12	12	729.813	1805.6	947.911	1299.59	4061.18	471.931	1047.93	1255.19	2744.05	3650.17	22791.9	1627.72	1022.11	2342.6	1381.77	2166	719.753	4441.56	207.658	1178.37	6365.68	7859.17	1466.11	4489.5	740.624	114.881	193.288	963.687	3482.84	1764.69	5604.33	669.964	1065.49	50.7979	20480.5	1.42981	325.849	736.804	332.623	1573.88	5135.32	77500.6	2568.05	3951.12	4958.27
O43493	Trans-Golgi network integral membrane protein 2	TGOLN2	1	1	901.673	267.559		483.677			649.89	365.673	335.912			820.061	661.06	689.504			311.5			893.452			510.713			1231.3	1525.85	672.073	982.272	1018.4		1070.88					272.461
O43502	DNA repair protein RAD51 homolog 3	RAD51C	1	1		428.648																										387.802									283.354		2127.19
O43504	Ragulator complex protein LAMTOR5	LAMTOR5	4	4	2385.76	779.417	998.447	2933.26	3110.4	4955.11	9542.89	326.119	7805.59			1756.29	1512.14	33.9916	1845.49	1458.25	2448.95	3319.36	9636.85	350.352			938.6	4949.94	8494.26	5193.58	6323.93	1958.76	3471.62	8398.57	21939.5	1455.72	4456.21	4729.46			1381.64	2108.27	3860.21	3834.89	1230.9		1277.13	6304.14	10212.3
O43505	Beta-1,4-glucuronyltransferase 1	B4GAT1	3	3		1991.11	3630.58	2514.14	15709.4	1764.76		2941.33	2075.27			2107.2	1970.4	6386.62	411.045	6266.13	2975	5126.14			10925		2802.38	4256.48	2881.15	1035.92	2786.69	1145.59	2042.57			1	549.88	1204.07			99.4876	1036.53	1267.44	1	620.375		2154.59	4298.34	6001.2
O43516	WAS/WASL-interacting protein family member 1	WIPF1	9	9	31014.3	23344.4	38248.8	28931.6	7070.51	62392.3	45555.9	21012.8	85267.6	30526.5	69847.6	24124.1	43436.7	26855.8	46728.9	25060.6	26791.6	105932	61962.3	25228.2	21640.4	18017.4	60449.8	48661.5	4072.7	9632.34	10250.3	12241.5	25734.7	35634.7	34593.3	20670.9	10783.3	25071.9	31480.7	16906.9	17116.7	9052.4	17899.4	14923.3	10440.3	13278.1	7934.94	4507.68	9755.87
O43521	Bcl-2-like protein 11	BCL2L11	4	4	443.647	1118.21	4597.76	2990.24		894.684	543.625		1392.32		5.60479	915.701	3637.75	489.691	1868.83	705.414	2370.8	3617.61	6243.4	545.181			2667.97	462.339			1930.16	1171.17	2078.91			2326.01	705.538	1039.33		1.52484	158.748	2824.06	1397.51			1.35547	204.356
O43526	Potassium voltage-gated channel subfamily KQT member 2	KCNQ2	2	2					4903.51					6.2903				143.189			81.9255		287.788		3505.02				2253.69														230.879		510.242		731.201	1898.91	869.23
O43548	Protein-glutamine gamma-glutamyltransferase 5	TGM5	2	2				453.948															305.254			1371.34														1748.45		387.614	1
O43561	Linker for activation of T-cells family member 1	LAT	2	2	582.134			327.054									139.121			342.273			757.645					142.835	292.276		216.907		970.218	827.513	530.099		142.604				107.724						136.898	329.778
O43567	E3 ubiquitin-protein ligase RNF13	RNF13	1	1		98.2759										264.747														1965.44					2706.2	1366.45	1798.77				325.691				2071.33		2586.64	1803.24
O43572	A-kinase anchor protein 10, mitochondrial	AKAP10	1	1	1746.44		203.284	677.08	744.002							1047.78		926.899	371.546	921.522	385.13	549.478	328.532		2268.94		308.455	1824.37				88.4328						174.338				1197.27
O43581	Synaptotagmin-7	SYT7	2	2	514.811	209.205	1259.53		23472.7							2600.27						2634.39			28576.3			1006.78				570.216						191.094									2825.39	4698.35	5296.24
O43583	Density-regulated protein	DENR	5	5	12570.1	9330.37	34981.1	18842.5	24919.8	14550.7	15322.7	10074	26038.3	36591	113575	12455.3	14568.5	9763.59	24091.6	11753.2	13569.8	4092.72	14791.2	14437.1	34215.9	14086.8	32065.5	12649.9	13863.1	14931	10850	8579.01	13418.4	7990.33	27373.2	8034.35	10192.3	13125.1	15751.3	20281.2	4114.02	7088.04	6635.55	15218.6	9669.38	39011.8	9529.64	16499.7	34021.5
O43586	Proline-serine-threonine phosphatase-interacting protein 1	PSTPIP1	2	2	7280.99	780.695	595.655	1720.8	297.355	3275.9	1318.52	404.21	4323.47			1209.33	2389.57	370.009	863.919	1844.03		2246.86	5674.31	9876.21		1851.77	5327.33	9915.95			1432.9	471.453	6804.18	15740.6	14727.8	1252.31	803.193	2533.89	2225.37		1079.65	683.967		3912.52			295.354	643.558
O43592	Exportin-T	XPOT	7	7	6095.02	1590.77	3197.67	2075.98	2835.74	3846.4	2096.79	1976.25	5364.45	3215.46	2344.6	1737.1	1899.77	2270.84	2872.37	3074.08	1736.68	3450.46	9887.92	1422.57	2777.87	1378.98	2871.28	4899.62	6051.7	3484.88	1575.04	1473.36	420.779	3012.66	3274.01	1670.49	1241.05	1812.43		8032.78	1205.76	1251.6	2202.93	837.247	532.894	1.17095	1362.74	1770	788.458
O43598	2'-deoxynucleoside 5'-phosphate N-hydrolase 1	DNPH1	4	4	6269.44	3035.43	2439.56	1229.13	2030.01	2805.12	4162.61	5003.05	2893.25	2697.42	35356.3	2587.72	4504.2	3160.21	1478.03	3705.23	2155.11	3326.14	17429.1	5179.37	20195.2	7521.16	242.946	1620.48	7264.25	2379.32	2347.11	1587.13	4010.94	3451.52	8528.08	3805.35	4092.77	7204.15	15115.2	6583.45	1573.5	1528.96	962.052	1476.57	4107.78	6289.09	1875.43	4399.55	12101.7
O43609	Protein sprouty homolog 1	SPRY1	2	2	354.172	171.822	1429.3	763.805	3335.14		2216.18	1				2060.61	1903.69	470.102	1479.56	2059.17	263.871	186.205	5490.24				655.631	10952.6					1		1.05585		1			1.44803			1						1
O43615	Mitochondrial import inner membrane translocase subunit TIM44	TIMM44	6	6	3667.17	3132.84	6805	5085.82	5417.91	5929.08	1979.35	3332.35	11579.1		31639.9	2559.14	2742.78	4134.78	3859.25	1875.02	3267.39	1631.1	6770.01	2684.94	4239.77	11.3425	7802.43	1302.41		26482.4	2370.82	2372.61	2138.76	1063.59		713.838	2154.29	1303.12	1.90008	5263.79	5401	3761.03	3563.56	2823.9	2961.46	1510.18	2926.52	736.078
O43617	Trafficking protein particle complex subunit 3	TRAPPC3	3	3	54425.3	29952.6	18867	22214.4	58165.9	58731.8	28640.9	29923.8	59896	99409.9	131673	22757.9	25296.3	18163.4	22900.4	26483.6	20843.1	35043.5	50797.2	46380.1	89112.9	55739.8	78721	47443.8	61364.3	59391.9	47295.7	28036.6	42274.9	47287.8	95730.5	45394.6	28902	38351.4	55016.4	57367.7	27892.4	19734.1	21524.9	47761.4	60356.8	115032	25531.4	69254.4	107050
O43633	Charged multivesicular body protein 2a	CHMP2A	3	3			285.12	234.518				27.9256			51911	123.838				1243.42	152.025		3787.03	7900.69	5813.02		2069.49	6121.66	3453.98		588.764		9503.83		3620.1			442.677				1
O43639	Cytoplasmic protein NCK2	NCK2	4	3	3521.09	338.662	991.948	533.957	3725.47	1562.32	491.387	1	674.355	292.758		943.748	571.303	1157.44	1741.68	996.927	827.415	1225.2		97.5018	13603.3	752.086	1246.82	2766.07	3719.84			458.782				30.4612	5566.29	3621.05			598.25	181.87		303.311			1219.59	1646.97	3867.9
O43660	Pleiotropic regulator 1	PLRG1	3	3	2274.41	494.408	952.063	434.823	312.431	134.497	848.687	186.445				911.74	1366.81	1700.08	1282.56	222.866	1322.5	12559.4		349.335			508.071	848.569			764.617	1532.07	2460.32			330.23	745.009				2150.68	1493.99	2123.45				919.034
O43665	Regulator of G-protein signaling 10	RGS10	6	6	415.331	942.312	623.881	862.385		969.099	1004.13	627.292	1087.16	1361.4		1577.52	2332.75	515.606	869.786	1295.24	1175.02	444.094	5006.43	1980.55		2039.79	1905.61	1054.67	380.04	7869.56	1189.03	1022.72	1937.39	533.614	844.162	1162.3	242.943	1369.74	1555.69	3563.55	1967.25	1146.44	2736.29	1079.19	2025.57		746.939	132.22	789.17
O43670	BUB3-interacting and GLEBS motif-containing protein ZNF207	ZNF207	3	3	7406.7	12512.3	12960.5	8657.44	3515.04	11130.7	7121.27	13625.7	13959.1	2695.61	100708	9763.1	9264.69	16349.9	12456.8	5227.88	12598.9	13526.1	20218.4	12436.2	2516.01	7776.81	15871	7318.11	3679.87	7068.12	8085.54	6807.46	22454.9	11563.2	9847.62	6640.87	3651.82	7363.62	7916.01	13290.4	14200.5	7816.29	18561.5	8501.04	1577.22	4006.43	5517.7	5441.21	8081.55
O43674	NADH dehydrogenase [ubiquinone] 1 beta subcomplex subunit 5, mitochondrial	NDUFB5	2	2	5926.32	2757.38	5509.92	5447.14	9723.75		2698.1	3907.14	1356.97	26716.3	57247.6	3023.05	2073.69	2435.04	2941.37	4527.97	5583.46	54375.5		7630.95	62814.4	32750.9	4606.96	1185.92	7352.59	6664.67	6767.5	6174.06	1876.65	6901.46	3406.58	3970.17	3361.15	6868.23		4184.55	6677.77	4621.06	16976.3	13357.4	6996.83	8.6089	9787.11	15805.2	28885.9
O43676	NADH dehydrogenase [ubiquinone] 1 beta subcomplex subunit 3	NDUFB3	1	1	2334.87	1615.7	1393.61	525.166	7300.33			1891.78	1580.7	1198.43	24187.3	1655.32	1145	215.773	1114.72	208.846	835.972	435.699		2845.16	22008	2928.89	316.799	1638.46	355.979		250.663	1145.52		638.258		1179.58	2525.21	1372.21		478.47	1090.83	1111.88	3284.98	772.74	3904.8	2103.26	3839.6	14706.5	23148.7
O43678	NADH dehydrogenase [ubiquinone] 1 alpha subcomplex subunit 2	NDUFA2	4	4	49696.7	24883.6	15029.2	14403	135198	35672.5	26813.9	25678.8	37550.4	101691	645255	33729.7	17886.9	15942.5	18855.9	13920.6	17786.1	49746.2	61717.4	43981.6	237177	87139.3	20910.4	51390.5	186492	33543	52360.4	40173.3	45253.5	59779.1	146345	45774.8	62853.6	49355.2	33569.1	55466.1	19323	32731.6	44396.3	58869.5	60422.2	91988.3	48110.8	205191	568919
O43681	ATPase GET3	GET3	7	7	24354	12306.1	14590.4	13833	38286.7	13135.2	19526.4	11090.2	16121.3	24264.2	81694.6	8315.4	16450	10618.5	13607.1	14915.8	20542.2	13864.7	19043.3	10238.6	84609	15201.1	12650.4	12394.8	18604.5	73168.8	10338.2	11005.8	16774.7	15431.4	28276.7	12717.4	14329.9	13171.3	50154.6	22321	10624	11307.1	10503.1	19458.7	23973.4	41020.6	14549.6	21691.1	41518
O43684	Mitotic checkpoint protein BUB3	BUB3	9	9	5920.25	10489.6	9155.38	8059.87	2580.47	6320.53	6512.3	9893.55	11487.2	5310.75	26868.5	7394.83	10835	17638.5	9426.04	5952.17	12181.6	31227.9	5370.59	9837.43	5884.44	9953.39	17117.8	5213.18	2370.31	5506.43	9698.76	8488.62	6965.05	5045.76	2184.17	10432.3	3327.96	7241.04	6191.71	14046	12425.7	9289.01	10024.9	6852.58	1576.3	2652.12	3869.91	2999.24	4723.2
O43707	Alpha-actinin-4	ACTN4	26	26	8178.23	5338.86	5068.5	4231.42	6211.39	12351.3	7982.34	4996.85	7289.76	7609.35	9943.84	3757.75	4553.48	6156.93	6513.34	4577.38	5577.93	13570.1	11334.4	7746.29	10818.3	6108.93	5581.21	9277.61	6468.3	8336.44	6154.54	4376.31	3883.88	5902.45	12511.5	5012.29	5615.24	3252.17	10110.4	19390.6	2833.9	1690.58	3304.36	4205.3	6974.93	8201.67	3564.13	3912.79	9100.2
O43708	Maleylacetoacetate isomerase	GSTZ1	1	1		254.333	472.047	410.709			896.612	612.985		1008.39		582.909	888.999		1603.2	120.809	2004.05						730.206	553.047	387.798		1076.81	543.611	1097.86	698.029	713.565	1904.51	1864.18	617.614			1133.53	159.641	241.74		402.049		2786.5	801.41	311.604
O43709	Probable 18S rRNA (guanine-N(7))-methyltransferase	BUD23	2	2	1496.57	16024.1	2334.64	11441.7		2333.32	1571.88	369.847	355.406			2485.88	1067.58	9399.08	4055.19	3110.72	2507.43	4586.53	8374.85				646.11	157.123	533.335		631.954	941.469	1350.71	588.043		1651.58	442.711	1498.16			2651.31	205.942	5625.82				386
O43716	Glutamyl-tRNA(Gln) amidotransferase subunit C, mitochondrial	GATC	3	3	5146.01	4748.93	9854.39	3066.93	7730.25	8492.23	4177.58	4007.9	7096.91	5792.07		5825.65	6243.02	7310.02	9265.27	10411.7	9896.03	12239.8	41756.4	11478.2	15912.3	2118.78	10164.9	8121.21	3280.82		9612.3	7755.35	7438.29	3266.55	11262.4	5231.43	5195.63	6978.56			2579.33	2958.86	7634.74	4336.42	1513.8	1285.46	4519.72	6787.97	17461.4
O43719	HIV Tat-specific factor 1	HTATSF1	4	4			3461.07	3929.01			1707.83	948.638				3143.99	5263.42	6201.15	4677.67	1355.83	3308.76	2682.43	507.3				3454.89	1739.79	1380.41		535.256	4184.33				2595.63	937.277	3125.64			4082.38	30215.9	3688.44			1.33998	1933.5	683.952
O43741	5'-AMP-activated protein kinase subunit beta-2	PRKAB2	2	2			22.8644	338.788	1483.99					126.163		93.51	140.311		218.518	226.813					1227.79	387.986			1660.11		305.926	47.9434								2.22313	75.1019					998.818	415.171	1151.87	501.221
O43747	AP-1 complex subunit gamma-1	AP1G1	6	6	12673.5	3962.27	4825.71	5579.84	8501.59	11094.7	3649.99	5167.79	8737.95	11722.2	53916.5	4324.26	4740.14	6994.36	4573.18	7136.41	4378.32	5047.33	8244.13	5313.83	12927.7	16581.8	7661.2	7191.69	7762.96	6673.67	7435.43	6238.81	7635.22	6919.35	18554.4	5277.45	3450.98	8513.15	4910.63	11751	7338.04	8968.27	7173.42	9901.67	8194.71	10291.7	5057.42	5437.03	12941.7
O43752	Syntaxin-6	STX6	6	6	6206.15	2890.6	6732.2	4743.69	12608.8	20952.9	3032.08	2402.96	10939.4	3493.74	21086.8	4256.07	2619.22	2137.83	2881.02	5324.69	2395.13	9543.34	11737.6	4929.19	11229.1	3350.95	7221.2	7632.04	6187.3	1414.79	5588	1721.58	5149.99	3554.3	4337.09	1164.47	2435.82	1782.97	3353.54	3884.05	2300.21	1449.09	1989.68	6917.09	7083.88	3801.9	2727.37	6579.63	6604.83
O43760	Synaptogyrin-2	SYNGR2	1	1	23025.2	8775.97	7467.06	30554.3	1392.03	11023.5	9018.17	11912.9	11469.8	10630		3909.49	14095.8	9831.42	4514.96	15935.9	10175.6	1176.7	1444.48	8612.69	5608.71	36804.4	11945.3	4177.04	28462.7	53071.5	16750.7	23447.4	73417.5	61803	72785.8	22604.3	27523.8	29206.2	47375.6	45341.5	58452	41414.4	36224	34974.9	27210.7	28132.5	20334.5	11793.8	19497.1
O43761	Synaptogyrin-3	SYNGR3	1	1	19403.1	5295.26	23331.3	4848.46	347894	837.615	3396.56	5838.37	6541.99	8039.28	630204	27774.1	1633.23	5771.97	4777.1	9834.42	4051.34	183433			499901		2221.35	27466.5	268326	29714.1		37164.6	2140.82	8456.18	1927.11	953.246	40631.2	63880.4	9148.85		2083.81	3968.88	19803.5	2315.21		67667.3	51029.3	168701	457820
O43765	Small glutamine-rich tetratricopeptide repeat-containing protein alpha	SGTA	6	6	1223.94	1960.42	2543.82	1400.79	4397.54	3247.3	2648.9	580.587	2345.24	2166.64		3204.74	2908.91	1465.67	3780.57	1806.37	2411.82	2968.48	4455.89	1303.32	1.63245	2603.47	1787.05	1610.33	4987.33	12842.9	3131.36	1963.3	1190.16	1547.08	8131.65	3539.1	3332.12	2997.72	26645.2	18368.5	683.725	1301.18	1074.26	3009.12	4701.7	17431.2	2567.61	5918.31	6783.03
O43772	Mitochondrial carnitine/acylcarnitine carrier protein	SLC25A20	1	1	359.13				2234.42			825.251		565.103																											128.794	1431.76	212.992				200.1
O43776	Asparagine--tRNA ligase, cytoplasmic	NARS1	16	16	5163.51	8216	7551.89	6811	12284.2	10140.4	6121.24	8232.02	12675.5	11055	36966.3	4523.57	10469.2	7223	10087.9	5948.85	16240.1	7656.56	11287.2	11482.6	14073.8	21275.7	9902.41	6253.52	9074.04	7902.35	10961	10179.4	16869.4	8280.36	10451.3	7925.38	8176.09	7103.72	10352.7	26367.1	5735.53	7700.27	10992.7	11026.4	10738.3	9805.12	6905.51	9214.09	10591.1
O43790	Keratin, type II cuticular Hb6	KRT86	3	0	7426.56	10026.8	6261.49	1983.62	1032.57		274.962	2033.72		26869.1	78545.8	2905.6		1079.57		1102.76		2469.63		11756.5	10983	192652	1870.97		4422.28	2371.13	1306.44	186.654	277.306			1550.86	2968.13		23599.1	63968.4	2781.36	25857.7	619.927	6513.97	11904.1	19363.7	2423.64	5832.66	36464.9
O43795	Unconventional myosin-Ib	MYO1B	3	2	1434.31	549.566	274.591	790.159			1121.14	1878.8	147.781	2.88812			1312.28	1713.07	140.328	1118.98	212.828	2255.22		1308.44	6.87631		114.929	1560.33				1815		829.458		3484.16	1664.71				2061.04	1186.9	2135.58	2573.26			924.933
O43805	Sjoegren syndrome nuclear autoantigen 1	SSNA1	2	2	1227.65	2078.62	2789.36	4678.47		7669.44	2421.44	561.892	2242.33			3554.29	1188.36	526.566	4819.73	1681.47	2348.72		20407.6	1720.32			792.561	1099.54			2058.65	2735.53	2095.85	4496.27		6505	3377.51	7714.12		1.57307	1492.88	878.585	1598.53	945.482	300.507	1.28587	892.498		2299.36
O43809	Cleavage and polyadenylation specificity factor subunit 5	NUDT21	8	8	8547.18	16457.7	17817	12646.3	6128.03	11654.5	9266.92	20074.2	18842.2	20452.3	107328	8732.41	10284.4	16067.9	8435.46	7335.34	16593.5	13373.5	13328.3	27908.1	18891.1	28111.9	30159.4	11126.1	12417.5	8002.16	25100.1	15372.5	16872.9	11361	29571.6	16608.9	6638.51	16680.9	20924.3	59265.5	22734.6	15564.3	24731.9	26886.7	11257.7	41000	10330.1	13072.2	17488.7
O43813	Glutathione S-transferase LANCL1	LANCL1	3	3	13202.3	7547.29	7618.47	2349.16	32612.8	6776.67	3115.28	6968.67	22255.6	66135.1	316505	3693.66	2965.52	16102.4	3236.92	6089.88	5657.3	11983.5	2389.42	10294	129973	354218	16358.4	9340.58	29202.3	32245.6	3527.08	5778.18	5511.38	4143.06	30056.4	2422.84	19308.9	6097.16	9065.99	8705.37	7770.02	4075.56	7850.95	6755.73	67172.3	99451.2	24119.9	33910.2	37661.5
O43815	Striatin	STRN	8	8	1985.9	1908	2117.56	1193.72	3978.1	1031.32	1156.75	1751.88	3294.92	2031.92		1514.73	1776.29	1732.68	1145.57	1031.99	807.31	1456.12	3515.2	1876.39	1037.46	1.10683	2744.48	1929.83	897.579		924.235	863.358	450.778	2666.9	1.53751	434.705	1999.52	1325.83	1.69009	1.58269	1980.03	1008.68	2840.55	129.363	352.014	1.32908	1527.05	1305.1	1197.82
O43818	U3 small nucleolar RNA-interacting protein 2	RRP9	8	8	16326.4	3157.31	6295.51	10277.7		2538.02	10330.8	5949.78	12845.6	1797.89	6925.05	6145.74	3829.68	8125.88	4818.78	10265.6	4346.16	1977.07	3577.99	5753.63		3866.2	6108.35	1777.13	351.343	1599.46	3647.55	12559.4	4220.71	18975.9	717.711	5907.61	9283.22	1805.39		11082.3	4733.57	4942.7	6108.65	2775.34	1	25856.6	2424.79	483.163
O43822	Cilia- and flagella-associated protein 410	CFAP410	3	3	246.953	1581.95	2853.1	401.099	7849.41	522.589	1500.03		4251.86	1610.87		1577.41	2270.7	2930.9	1636.27	691.659	4594.21	2337.05	1802.48	592.32			3238.87				2817.18	254.395					1157.83				162.196						1368.95	534.751
O43823	A-kinase anchor protein 8	AKAP8	5	5		919.482	351.178	438.019		273.564		1113.36	213.431	1.15739		422.155	653.668	502.868	538.148	79.42	340.879		474.799	1005.85			1145.09					217.36						178.39			693.48	586.772	349.202
O43837	Isocitrate dehydrogenase [NAD] subunit beta, mitochondrial	IDH3B	4	4	190.98	2103.77	2354.21	1289.82	8965.08	3393.22	871.561	2663.33	3504.93	2137.19	23206	1672.82	1724.29	1458.32	1154.8	1027.29	2633.79	3180.21	134.467	1222.32	33942.1	8520.39	2762.44	2132	3199.38	2034.3	2300.86	2352.93	612.577	1756.65		2220.14	1907.23	1481.23	792.612	80.6687	1890.73	2212.42	3964.19	2244	1006.92	5162.15	4245.83	7554.74	12301.9
O43847	Nardilysin	NRDC	8	8	7052.09	2095.21	2423.4	3251.91	3192.75	8092.68	4749.53	2578.76	6781.64	4257.64		4883.92	5949.6	4182.19	7193.88	4463.85	5456.1	8595.15	11749.7	6503.4	6074.81	10875.8	15935.5	5195.57	11770.7	2785.39	4419.05	2445.74	5323.78	3611.76	1186.07	3356.18	3064.52	4586.81	9138.85	13432.9	2533.77	2468.16	2511.66	11033.6	7564.11		805.256	795.55
O43852	Calumenin	CALU	9	9	16420.1	5401.5	19386.9	12353.1	22262.3	20512.1	16359.8	14966.9	38849.3	15820.9	191738	14959.8	14096.4	18052.3	11017.7	15946.5	12562.2	3418.21	25383.6	30375.8	95894.2	34939.7	20912	35140.4	26035.7	61590.8	25619.1	9959.94	26684.5	20907.4	42068.3	21636.7	11318.2	7727.59	101413	88681.4	7955.3	14252.2	12998.6	30959.9	18335.4	69348.5	6521.53	17038.8	40085.4
O43865	S-adenosylhomocysteine hydrolase-like protein 1	AHCYL1	5	5	4158.2	513.185	545.583	926.13	6594.65		421.858	246.194		1236.88	46031.6	1190.67	482.918	999.238	1424.38	609.523	785.526	6711.79	13024.8	5320.07	83282.3	9728.99		13430	6749.24	420.846	1826.03	801.95	7276.14	6068.42	22207.9	3631.19	3278.71	663.918	9745.73	965.477	1443.48	3253.26	2950.78	6903.68	11643	4870.36	2277.24	5184.33	6669.18
O43866	CD5 antigen-like	CD5L	1	1	203651	2052.11	3226.14	9846.42	10155.8	3979.17	8489.43	1250.84	5101.16			14865.3				31200.4	3239.31	6890.36	19218.7			13170	2310.26	6602.21			500.313	3716.17		1514.38	4294.53	6355.8	1857.31	5298.58			983.472			2552.26			1784.58	2926.47
O43914	TYRO protein tyrosine kinase-binding protein	TYROBP	1	1	15944.7	7148.53	3579.82	2179.52	1043.84	3678.77	5447.47	2764.44	8691.01	9901.83		4661.56	3946.22	2004.37	4006.99	5985.77	2119.03	53193.5	8929.45	15281.9		7970.01	7232.72	11135.9		994.297		1912.35	2826.29	10783.4	17730.2	2338.02	3451.99	2508.75	20013.2		2834.62	2107.53		2212.52	2394.87	2050.04	2819.27	1360.53	4134.11
O43916	Carbohydrate sulfotransferase 1	CHST1	1	1					2918.75											528.74
O43920	NADH dehydrogenase [ubiquinone] iron-sulfur protein 5	NDUFS5	3	3	29263.1	11342.6	15668.9	13553.6	72806	11592.9	14467.1	11945.4	38406.7	39321.6	586653	15400.2	13366.3	15932.3	16051.7	18044.3	14601.6	7071.14	8450.24	17180.1	132392	59950.9	16443.5	30918.7	22848.7	22712.8	18391.2	9064.36	10672.7	14117	25312.5	12610.3	11575.5	11043.5	14043.4	39486.2	11863.5	23148.3	22039.2	18216.1	38088.3	53749	15486.4	31550.8	122335
O43924	Retinal rod rhodopsin-sensitive cGMP 3',5'-cyclic phosphodiesterase subunit delta	PDE6D	2	2	786.549	2569.48	1045.44	1274.48	6189.79	1412.16	1689.05	865.411		7804.24		4380.43	2985.84	1926.91	2807.2	3857.28	1478.48	3122.21		272.177			822.707		6452.09	6727.92	4028.18	996.49	368.887	1868.92	1678.41	2772.64	2321.54	4689.55	14564	2940.83	1652.33	1575.2	1081.28	1135.68	1258.15	5404.07	4369.89	5558.92	2301.9
O43927	C-X-C motif chemokine 13	CXCL13	1	1				46.4781					1					1		1177.91								210.826
O60216	Double-strand-break repair protein rad21 homolog	RAD21	11	11	5470.84	3408.84	5292.15	3978	2122.36	16105.9	3776.02	3722.81	8559.06	1797.86		3205.58	5409.07	4376.26	5169.92	5447.91	3622.36	1941.13	12058.9	6446.92		9410.13	5713.02	5391.6	1431.18	2795.98	3978.3	2854.99	2799.07	3003.5		1445.6	997.175	2932.2	2498.57	3860.64	4273.93	3167.18	6544.7	2425.52			2062.46	1631.39	2173.33
O60218	Aldo-keto reductase family 1 member B10	AKR1B10	5	1	6159.13	25548.1	8316.15	22190.1	12475.1	14206.8	4483.34	3108.48	22698.8	3547.3	108425	3952.88	3685.92	6164.62	10853.7	3744.74	4350.18	32336.2	3274.69	16351.3		21119.4	13054.2	18347.1	5659	18246	8209.12	8688.37	18893.6	7095.79	75302.8	7904.54	18696.9	14569.5	6192.28	8091.01	7447.03	14818.3	13321	6540.43	1	10154	2895.03	4381.05	17313.2
O60220	Mitochondrial import inner membrane translocase subunit Tim8 A	TIMM8A	1	1	53810.1	23905.3	134563	91439.1	125967	191240	22211.7	24406.7	200140	58861.9	755679	53913.2	82872.6	39623.6	42450.9	46031.5	61974.1	36342.5	651680	44987.3	208402	51557.2	77521.9	80145.3	91825.1	37334.3	54089.1	39681.4	62856.7	57900.8	89263.6	59141.5	48813.8	91531.2	74184.2	132697	43693.4	17745.4	68746.5	75179.7	65331.8	72346.4	41356.3	111229	315972
O60229	Kalirin	KALRN	1	1		5036.39	4967.45				1995.3						2320.37			1075.81										7516.52	5163.05	2718.95			2277.17	3874.14	2753.25	1830.36			4670.6	538.974	1327.5				2034.28
O60231	Pre-mRNA-splicing factor ATP-dependent RNA helicase DHX16	DHX16	8	8	395.43	469.29	1905.88	1370.99		1461.83	668.541	769.382	2635.87	617.014		553.289	1552.09	1549.24	1496	1517.36	1359.49	5542.32	1097.38	787.451			2536	1127.74	1.01727		821.579	918.598		200.885		813.251	325.399	539.885			1393.56	1615.62	1152.57	1.03166			834.036
O60232	Protein ZNRD2	ZNRD2	2	2	3210.72	5056.92	11327.3	5949.83	2874.45	8503.9	3678.74	3430.59	2545.24	4298.72	9021.56	7114.19	7168.64	8528.51	12545.8	7840.67	14873.2	38982	28419.8	5029.84	2251.02	6638.58	3501.12	1619.7	7113.21		4891.24	3192.44	14011.8	10063.8	9954.48	5186.35	5040.41	4661.11		1307.93	2082.64	2533.47	2263.17	10414.9	4168.58		2925.35	3927.19	5148.58
O60234	Glia maturation factor gamma	GMFG	2	2	15673.2	4527.72	10002.5	8744.66	961.952	23460.7	14676.1	3008.52	3208.46	3683.81		6986.85	10091.1	1900.32	8648.47	11484.5	15539.5	12167.9	25819.3	5762.46		1792.94	1862.02	10564.8	3359.28	5120.03	8718.27	7165.6	4925.45	8416.28	26544.5	10184.1	8507.62	14644.4	12255.9	8922.07	5089.76	4712.23	8833.9	12849	4089.48	10409.8	2249.99	437.532	2498.08
O60238	BCL2/adenovirus E1B 19 kDa protein-interacting protein 3-like	BNIP3L	1	0		2887.29	1367.25	3276.18	6544.67	1943.08		1533.09	5101.02	1728.33	6046.55	631.959		230.113	1465.73	735.541	3103.75	2153.01	1083.15	4149.86	12483.2	9381.37	3898.5	2274.38	1702.11		458.723	407.094				201.581	1692.28	1291.04		7413.87	1569.21	1160.43	1301.93	5280.32	4491.01	1661.84	3852.12	8599.24	17367.3
O60240	Perilipin-1	PLIN1	2	2																											1279.62																		701.639
O60244	Mediator of RNA polymerase II transcription subunit 14	MED14	1	1				119.302																								92.4024					33.3726				1120.01	230.301	134.614
O60245	Protocadherin-7	PCDH7	4	4	191.703		1364.61	675.088	9365.02							1675.42				229.738		23144.7	4016.67		3219.61			1276.1	1875.37			191.13				1116.34	267.646	405.47									1066.69	558.323	3644.95
O60256	Phosphoribosyl pyrophosphate synthase-associated protein 2	PRPSAP2	11	9	2937.65	2700.12	4191.19	3469.27	6393.38	6588.78	1968.71	2670.55	2797.74	2952.2	4.75259	3013.9	4656.12	5994.81	4678.09	2210.97	7632.13	3888.35	5740.57	3057.71	3366.78	1933.3	2301.65	2967.12	2478.36	7783.7	3711.93	3960.99	3524.53	3850.89	4489.12	2607.14	3101.8	3268.69		1407.01	2947.29	2708	2987.2	1224.24	3708.66	1773.38	3715.48	2306.45	3121.84
O60262	Guanine nucleotide-binding protein G(I)/G(S)/G(O) subunit gamma-7	GNG7	1	1	3163.25	8374.74	4970.07	3497.33	62957.7			1339.66	11978.9	152177	238982	2838.18	475.126		3765.77	2798.37	2361.15	10245.1		14408.6	163024	113365	7868.62	9763.05	97898.8	11645.7	542.632	4699.45	1190.3	527.372	17362.1	248.512	75538.5	10388.5	2.60709		4089.01	388.748	13747.8	17335.3	91263.1	59061.7	57422.6	124512	577471
O60264	SWI/SNF-related matrix-associated actin-dependent regulator of chromatin subfamily A member 5	SMARCA5	22	14	1562.06	3166.21	4335.54	4748.93	161.24	2392.35	1430.48	3577.14	4306.83	8495.9	8754.84	1467.62	2646.84	4313.97	2979.88	3602.79	3631.55	9281.34	1033.1	2213.91	2.05189	440825	7045.36	458.073	503.082	4039.52	2128.06	2644.77	1	25.8055		1544.72	670.63	1359.04	44565.9	24258.2	4425.03	3697.22	5808.83	5566.65	11206.9	568943	1155.19	1614.23	2037.82
O60266	Adenylate cyclase type 3	ADCY3	2	2	11986.6	6547.17	10224.4			40224.3	3535.28	12963.8	6662.48	19255.5	507008		2526.11	4005.74	1535.39	991.248	1953.73		12029.5		260444	129308	16915.5	2983.7	87792	28366.1	20911.6	13941.7		49585.9		20808.4	13603.4	36427.5			7383.94	9528.5	20648.2	50780.5	23100.9	53959.4		10048.1
O60268	Uncharacterized protein KIAA0513	KIAA0513	8	8		432.588	3788.39	742.803	22040.9	92.9789	347.011			1359.77		2692.5	157.565	126.761	151.33	276.366		82533.2	818.482		19963.3		966.501	3520.34	12647	2653.66	214.383	1353.44		163.431		142.834	3467.08	1194.46	1121.62		291.056	1235.32	668.632		3207.45	5322.72	3102.84	9665.92	28926.5
O60271	C-Jun-amino-terminal kinase-interacting protein 4	SPAG9	8	6	8610.56	2598.68	3838.74	2307.85	13412.7	7991.23	4401.66	1554.08	13229.9	12026.8	128911	3013.92	2631.29	2692.01	3234.72	3846.35	2244.38	344.782	3554.67	7516.05	22922	14611.4	22420.2	4744.28	7163.27	11803.6	2228.01	1686.13	2278.63	3475.56	9183.38	1311.7	2528.18	2309.75	1.57681	6702.49	1696.39	2699.67	1792.9	3802.95	5331.54	7876.14	3457.54	3786.52	8209.85
O60279	Sushi domain-containing protein 5	SUSD5	2	2	486.505			98.5004	4775.34					342.67		1053.43	309.657			156.468		695.415			9555.44			470.028	358.477		230.171				1138.84	126.458	1835.86	858.609			178.421	1						5028.88
O60282	Kinesin heavy chain isoform 5C	KIF5C	3	3				1	2112.1						13.2003	43.3412	16.6861					358.317									28.3759		1				270.203	1			1	153.11		1	254.346		350.438	228.136
O60287	Nucleolar pre-ribosomal-associated protein 1	URB1	4	4	2503.38	3297.19	2147.83	588.935		2365.88		835.303	2312.82			1316.13	1028.55	1603.21	1724.99	1697.69	1546.61		2445.73	2082.57			6870.79				703.095	1085.39	1054.86			811.915		636.446			2959.72	1046.05	1130.96
O60292	Signal-induced proliferation-associated 1-like protein 3	SIPA1L3	1	1		219.203				324.896						1784.59					84.3672		871.307
O60299	Leucine zipper putative tumor suppressor 3	LZTS3	3	3		1			1945.17							896.956	1703.85																														1273.68
O60306	RNA helicase aquarius	AQR	8	8	855.881	1223.49	1015.15	1462.51		771.316	667.266	2155.59	916.903			703.038	1341.38	1670.79	941.958	1214.27	1155.36	780.125	342.313	376.591		1221.44	1503.37	49.3719		1	2571.64	1738.08	731.837	1291.63		741.59	194.272	1234.21		932.038	3961.56	1753.55	2156.17	50.2065			689.419
O60307	Microtubule-associated serine/threonine-protein kinase 3	MAST3	2	1		216.809	511.654	835.239	4704.35	2386.61	3250.34				13.6002		2017.65		614.797	2658.04	1599.96	642.286	848.076						2134.97			1432.4			1663.32		907.986						1300.73		404.973		940.765	937.944
O60313	Dynamin-like 120 kDa protein, mitochondrial	OPA1	10	10	1034.99	205.424	236.146	91.3858	2012.13			635.218	1482.04	629.077		130.239	325.289	418.829	207.261	333.143	347.257	859.383	2811.09	199.002	993.094		145.073	2192.18	383.803	7459.98	841.757	746.908		810.409	405.239		377.826	2692.01		2221.24	1803.59	1785.9	1598.96	88.9983	584.772	588.333	1245.76	2926.11	10083.5
O60315	Zinc finger E-box-binding homeobox 2	ZEB2	1	1				527.544		3091.31		1562.07	4616.84			1032.01								4935.15			2038.5														2364.25
O60331	Phosphatidylinositol 4-phosphate 5-kinase type-1 gamma	PIP5K1C	6	5	1918.07	1748.95	1583.11	396.887	7638.75	1148.62	1877	1161.02	1381.7	3911.27		1223.25	791.945	1406.74	2114.52	853.608	1128.31	1900.55			40900.7	1355.02	1609.58	1966.13	3205.7	3828	3167.79	1341.34	1679.16	777.28		577.199	1345.76	1221.81			3448.68	1731.75	149.566	579.688	4755.08	14905.5	3391.32	5426.4	10083.7
O60341	Lysine-specific histone demethylase 1A	KDM1A	7	7	747.794	1035.63	1263.8	2423.02		1353.2	619.188	809.697	917.087		4027.31	892.538	1745.89	3691.26	1134.43	1701.27	1624.93	535.76	2924.04	6919.84	28727.3		1731.04	104.239	597.674		215.844	544.959		649.798	457.212	204.387	156.15	240.772		2656.21	1704.9	787.935	564.983	25216.6		1.33493	249.535
O60343	TBC1 domain family member 4	TBC1D4	16	16	529.874	5900	227.859		3916.64	1	1		540.403			151.694		5785.28				400.433	3975.47					355.743	828.441							167.735					134.681	138.819							2.46019
O60346	PH domain leucine-rich repeat-containing protein phosphatase 1	PHLPP1	1	1			569.575															15631.4
O60437	Periplakin	PPL	7	7									1021.34		2767.72			225.58								2708.79			1607.37	18767.9	1716.99			324.572	4976.48		359.023	730.272	15682.2	11950.8	360.746	2644.49	917.517	1900.31	2818.63	21981.5	843.523		3321.66
O60443	Gasdermin-E	GSDME	8	8	12578	4280.73	4703.51	3822.95	6191.94	1673.92	4603.57	4613.87	5953.32	10396.9		4665.05	4712.44	2479.76	4353.37	9619.18	2097.16	9228.05	24928.9	5100.84	5970.73	7966.13	7055.66	7798	11759	7645.81	128.408	3134.25	4015.6	6995.13	4831.22	1672.69	3575.2	2621.63		2167.75	3494.12	2632.87	3667.01	2292.78	4237.35	3246.78	3509.88	4212.63	16720.7
O60449	Lymphocyte antigen 75	LY75	4	4	800.82	269.888	380.325	2672.33		840.052	522.749	2246.56	815.051	514.554		709.413	1586.12	2601.52	1313.32	1160.27	1178.64	2863.23	2046.97	1427.21		1531.99	683.956	599.674			1927.58	1738.27		2811.86		1779.6	136.815				3926.62	662.022	1422.28	3022.85	933.027	1313.44	738.569
O60462	Neuropilin-2	NRP2	3	3			553.674	388.45	3569.41		798.342	2279.08	1973.84			2.60167	545.089	1286.5		2212.67		2624		588.978				2217.23				1139.36	3266.27	4995.26	4587			1531.03									856.667
O60486	Plexin-C1	PLXNC1	2	2	1725.37	680.479		632.687	318.114		1596.82	396.599				711.075		709.457	117.419	556.231		1743.66		1486.68				940.212				68.237	877.509								655.239	65.0335					1675.43	834.156
O60488	Long-chain-fatty-acid--CoA ligase 4	ACSL4	6	6	8362.03	2328.18	4633.99	6428.01	14115.5	11486	8090.43	3473.39	7251.73	3751.49	23524	3651.68	8960.84	3127.12	4482.51	6919.78	2798.47	6374.97	27320	3988.55	11588.1	2842.91	4052.83	621.307	5053.09	27841.7	5610.58	3463.01	8963.12	12013.7	27007.6	2914.54	6125.53	8106.25	14007.6	5650.72	7462.39	6396.67	11596.2	12073.4	3179.35	11324.5	2516.63	2785.21	7444.65
O60493	Sorting nexin-3	SNX3	8	6	21587.1	21594.2	11828.1	10072.2	25774.8	22126.7	24873.9	15433.8	20042.4	46943.9	172397	17740	10084.3	12005.4	16324.3	29088.2	12837.4	15205.6	44979.1	30503	55005.6	36609.1	26075.2	31219.1	29466.5	13968.9	23226	17940.3	9917.08	11680.1	92069.7	24691.9	22892.2	31501.3	43022.8	53622.4	20260.6	21301.5	13846.8	48766.7	31754.3	34713.9	27016.4	43481	98934.5
O60496	Docking protein 2	DOK2	4	4	1913.47	2089.99	1338.82	369.765		3110.14	6610.7	2391.08	1577.91	1.40518		3949.93	1146.22	132.951	711.284	1536.56		4128.35	1974.93	7963.98			3832.69	14751.7	321.59	4880.37	306.367	450.56	616.43	2266.27	1663.92	665.072	776.814	311.912	1.49901		1091.98	1835.96	1	2589.15	1		92.5712
O60499	Syntaxin-10	STX10	2	2	2645.23	1555.12	1473.11	1024.97	2463.18	5972.76	1501.23	1029.43	7710.85			1785.57	2140.01	4787.75	911.687	1168.02	1801.98	1877.18	7690.16	3362.08			1684.85	3607.05			1702.38	3803.16	3756.37	1279.7	528.582	3581.72	2129.74	2397.82			763.779	2753.83	3405.6	3855.13			916.814	1487.93
O60502	Protein O-GlcNAcase	OGA	9	9	1533.83	1399.49	666.942	1635.55	7610.02	1829.58	1708.16	1298.22	3246.84	1015.48		1733.33	2490.74	1537.13	1631.65	2403.91	1962.23	2350.63	3050.76	1610.69	9801.58	1	1750.15	2505.95	2457.17		1128.27	851.004	1482.21	1259.67		902.181	1652.14	1360.65			1104.28	718.735	593.117	1245.02	1211.53		1915.45	2473.87
O60504	Vinexin	SORBS3	4	4	273.988	933.394			857.595	1187.91	1523.52	830.729		1143.02		1299.46	751.947	999.932	251.139	955.638	2513.36	1875.44		485.48			551.748	1273.24	1226.33		941.195	242.521		884.375	1.42613		478.494	223.267			1420.94	1468.68		1			748.067	1166.03	2394.78
O60506	Heterogeneous nuclear ribonucleoprotein Q	SYNCRIP	17	12	25796.1	57502.6	56619.1	29819.3	20724.8	34235.1	21995.5	37550.8	47040.8	40178.8	557058	26745	46331.5	47029.6	41015.8	28082.5	44094.8	36218.6	47446.9	46636.6	60110.3	82047.3	51998.3	20503.5	21325.9	33638.3	42878.8	36664.4	27535.5	28964.5	44570.2	26349.4	21860.9	19269.9	51234.5	103547	20481.7	27099.6	51565.2	24742.5	30120.8	43204.1	17669	14370	23017.6
O60508	Pre-mRNA-processing factor 17	CDC40	1	1		219.185	978.111					83.2583	687.916			833.243	1746.83	250.875	1218.44		608.704			421.036			1619.2					1379.53									1627.3	259.546	386.741				182.469
O60518	Ran-binding protein 6	RANBP6	3	3	914.734	637.245	1151.43		4954.46			613.289				627.442	42.156	199.667	375.593	882.298		650.119		1	4938.42			282.317	344.355								971.318				1574.27	276.811			1233.73		1164.25	2770.76
O60524	Nuclear export mediator factor NEMF	NEMF	5	5	2654.07	3397.2	1897.45	2760.21	501.777	4257.95	2739.75	2816.59	2654.71	6064.58		1411.12	3576.66	3380.41	3123.17	3093.54	4503.02	2544.77	3644.33	5083.68			2238.83	3305.63	3053.37	6573.39	2882.2	2804.22	4395.38	2096.46		1714.71	2827.17	3312.92		7356.6	4154.98	1007.89	1608.83	766.539	1663.57	11071.7	2509.63	597.487
O60547	GDP-mannose 4,6 dehydratase	GMDS	1	1	166.332	1				362.623	502.625	744.454				576.188															123.235	410.769	522.737	316.069		1.19758	482.935				179.145						248.04
O60568	Multifunctional procollagen lysine hydroxylase and glycosyltransferase LH3	PLOD3	6	6	6865.16	5449.06	2355.9	5324.73	935.183	5563.63	7851.37	7902.49	8732.63	790.259	8911.82	1904.12	4860.37	2519.79	2861.45	6008.38	2342.41	7781.44	1068.77	12812		3136.57	7198.96	5983.37	267.86	5783.35	2736.39	3383.29	3256.35	6713.87	5721.97	2997.5	976.613	1905.93	2743.44		3137.73	4946.44	1582.38	7135.35	2284.18		1654.32
O60573	Eukaryotic translation initiation factor 4E type 2	EIF4E2	4	4	2206.15	1950.2	1485.71	1196.88	1117.66	1746.02	1302.6	491.262	2439.13			1975.32	1225.71	2106.05	1277.99	429.818	703.667	1759.34	598.11	686.202			440.845	761.287			466.491	265.37	677.458			286.455	450.957	159.63			183.491	389.116	608.658				227.02	1
O60603	Toll-like receptor 2	TLR2	1	1	13413.9	1526.78		906.912		724.759	3369.47			4800.52		1004.49			1766.16	1329.42			3408.8	1240.12			7950.22	2919.81		606.31		1224.98	3421.72	9111.06	19354	781.116	1032.13	2499.29		10555.3	1809.72		2588.05	3487.69			1919.03	917.577
O60610	Protein diaphanous homolog 1	DIAPH1	15	15	2351.7	1666.2	1550.31	2164.76	2536.5	2359.43	3148.61	2098.98	3038.18		3.33797	2245.76	1947.07	3970.2	2917.49	1573.74	1232.08	1337.52	5468.15	1587.23		3172.79	2678.38	2404.7	627.346	5533.13	1528.43	1833.71	2952.68	1942.84	4354.89	1639.89	1520.36	1744.39	4283.72	972.622	1345.35	1706.43	2421.23	907.427	699.782	3631.78	1123	1656.03	3076.46
O60641	Clathrin coat assembly protein AP180	SNAP91	12	10	3664.17	1917.12	4971.49	2709.88	52797.3	85681	1085.28	2496.31	8946.89	15225.8	75601.1	5508.12	959.865	1048.15	9819.88	4158.8	1590.5	139651	7685.55	8827.5	45074.6	19245.2	3160.32	11092	20682.9	11926.3	10132.9	2247.12	8745.98	3854.06	25458.4	2787.5	5862.45	4664.74	12543	3614.09	1097.55	2079.14	2070.81	4059.28	11791.4	12505.1	7818.16	19263.7	41947.6
O60645	Exocyst complex component 3	EXOC3	5	5	2617.1	2909.47	4044.09	2677.12	3684.09	3350.31	3148.47	454.023			20377.9	590.832	2621.26	2925.31	2552.82	1666.45	4261.66	1412.98	8368.79		14478.8		7173.8	4281.77		924.224	6244.35	2720.96		4743.28		6818.78	5330.76	2264.93	7993.15	13874.3	2948.39	1851.52	2434.73	6502.04	6930.62	5860.71	1761.68	3323.25	5792.59
O60662	Kelch-like protein 41	KLHL41	4	4														589.721											1	1401.76	673.208						253.219		5947.06	2354.15	116.707	663.827	357.503	1533.14		13501.1	724.181	833.13
O60664	Perilipin-3	PLIN3	12	12	5591.38	5447.16	4488.59	4472.75	3569.09	7213	7700.83	3738.13	15852.8	14219	5.05038	3548	11209.3	4937.44	5035.77	6509.91	5921.98	5799.5	13158	7600.53	5410.32	8067.88	8428.22	9745.86	12857.4	4834.51	6873.94	5654.21	16044.8	14349.7	24198.2	8590.22	11401.7	12941.2	5688.76	84914.5	3586.14	1948.62	7451.27	7127.94	20024.3	13902.2	9011.15	9465.72	17021.3
O60667	Fas apoptotic inhibitory molecule 3	FCMR	1	1																			2398.16											1556.52							2039.19
O60671	Cell cycle checkpoint protein RAD1	RAD1	1	1	9446.36	5657.23	8676.44	11653.3		11660.8	4986.15	6013.34				7146.89	6788.01	11509.9	9049.69		12333.1		10201.3				1160.63					3757.4	12116.7	9593.12	1553.2	5495.73	4688.05	5025.54			5710.19		14522.5					1058.37
O60675	Transcription factor MafK	MAFK	3	1	397.2	3146.68	5950.06	3618.28		5798.69	2432.09	1287.41	3779.06	999.854		3970.54	3510.25	7557.59	4595.6	4086.79	4711.99	3627.25	5221.2	2520.09			5732.49	4000.17	3128.91		4421.22	3000.24	6089.34	3106.46		2504.11	1610.12	9296.32		4065.64	2616.17	4145.23	6688.87	9197.37	8529.19		7223.95	27466.7	13165
O60684	Importin subunit alpha-7	KPNA6	7	2	3930.55	2414.37	3387.54	2945.32	2321.72	2354.95	3611.36	1670.93	5136.08	1059.06		1903.24	3355.18	634.153	3551.17	2250.25	5293.5	8818.13	9240.47	2096.02	178.076	2.44973	2717.08	1257.02	3037.88	1971.47	6437.81	2631.85	5699.23	2096.77		1852.67	1592.31	1569.63			736.282	653.983	1562.1	1	1		1009.37	1393.16	2643.18
O60687	Sushi repeat-containing protein SRPX2	SRPX2	1	1				666.503				1346.62	8628.77			899.263	1381.15	661.172		3404.81			481.723					4652.88
O60701	UDP-glucose 6-dehydrogenase	UGDH	11	11	6392.27	1719.78	3729.62	4921.22	3596.29	8265.67	3210.34	4379.25	1788.49	1302.89	1557.07	1732.27	3076.02	5379.36	1273.2	8299.75	3537.4	1330.79	6343.74	3428.04		1668.1	4034.31	4377.93	1831.67	12191.4	2803.27	1388.71	1775.26	2871.5	6664.17	2064.65	1179.83	1630	12316.6	5678.54	684.974	1422.97	1434.68	2653.97	2713.44	117378	966.473	741.051	2190.72
O60711	Leupaxin	LPXN	5	5	12386.6	4799.55	7949.73	1071.91		12250.4	13093.1	6843.01	7611.43	1980		5859.68	19988.1	39084.4	10923.4	4031.75	5217.01	4250.73	20279.4	10591			4558.2	8317.73	3266.82	3034.65	12548.5	10282.2	19159.7	20428.3	41892.8	13814.8	12657.3	6388.86		18492.2	9208.51	8787.11	10588	49329	1464.37	136731	60905.5	1254.65
O60716	Catenin delta-1	CTNND1	8	8	1835.8	1924.79	1846.74	2254.04	3424.42	1	1019.3	2542.31	4580.69	3846.89		1142.73	1751.59	3177.89	1641.21	1440.67	3497.53	2830.74		1034.24	13013.4	20314.2	3497.58	4657.1	1781.81	868.402	493.634	1174.56	472.295	564.777		466.985	989.415	400.989	1.58918	1645.96	626.796	1417.4	489.556	1577.45	2875.73	1677.07	2258.65	2012.67	981.098
O60739	Eukaryotic translation initiation factor 1b	EIF1B	4	1	13435.8	10138.8	7789.57	5613.9	8378.42	9700.35	6502.8	8152.29	8622.89	18065.8	59871.5	12176.8	8672.57	8763.2	9937.37	5356.47	6314.56	4889.03	15250.1	8877.94	11515	22361.7	10475.7	4091	14996.4	16409.8	13776.7	8967.27	13640.2	11608.7	40364.2	19976	10608.5	16058.5	70514.5	88924.4	10736.1	9652.98	14825.6	21681.2	13389	77007.7	9300.08	14075.1	36350.1
O60749	Sorting nexin-2	SNX2	9	9	5994.17	4723.95	3982.48	4785.01	8001.18	10243.3	8217.56	4515.57	8915.91	8776.68	13.4212	4373.71	4853.37	3197.49	6026.09	7939.73	5802.15	9697.69	9009.54	6234.91	10067.3	22758.9	6641.13	10073.3	4538.46	7596.83	4439.99	2276.92	6232.77	8315.9	9383.06	3697.03	3893.61	4307.81	9056.91	6821.92	4470.34	4487.97	6021.4	6078.82	8167.04	6300.65	3512.45	4207.2	7855.66
O60762	Dolichol-phosphate mannosyltransferase subunit 1	DPM1	6	6	11399.3	3103.09	2273.66	3520.53		1569.85	2294.88	4519.26	4833.65	6445.14		2117.81	1699.86	2734.59	1978.86	3152.41	2455.89	1382.53	8165.01	2958.37	10858	11602.4	3727.33	3267.97	3373.89	6075.08	759.36	3975.14	1605.5	8468.93	11679.9	5144.33	2122.72	3705.86	9164.74	16823.6	5380.78	5688.86	3452.8	7470.29	2277.76	5116.1	2292.48	2581.89	3492.84
O60763	General vesicular transport factor p115	USO1	15	15	7646.92	5748.05	7278.24	5453.17	10873.2	8851.79	8285.16	4202.33	8461.91	16867.1	19782.1	5099.76	5233.75	5828.79	3941.07	6891.02	8640.19	7057.93	8816.99	7808.47	20630.4	12460.7	7965.75	6981.5	6404.71	9794.29	4946.59	3460.65	6044.97	6573.75	13882.3	3969.38	3733.09	5130.15	15529.8	7348.47	4282.58	4675.31	4466.13	9831.29	6151.25	8763.22	4078.21	5284.44	10911.7
O60784	Target of Myb protein 1	TOM1	11	11	2937.68	1101.39	1138.12	1004.95	8264.82	2810.66	2574.87	998.955	5100.87	3321.7	14738.9	1900.73	1231.15	1655.75	1343.24	2265.78	826.275	5001.67	4584.56	3330.29	3882.32	2458.3	2041.11	3929.94	4103.15		1214.03	1697.76	2871.06	3607.05	6309.97	1502.6	2808.26	2115.99	2224.05	2686.41	992.818	1079.03	674.011	1811.97	2191.56	366.191	2572.21	4734.17	9431.85
O60814	Histone H2B type 1-K	H2BC12	13	0	1.72746e+06	1.31154e+06	910341	940079	218587	1.91577e+06	954294	1.50611e+06	2.1599e+06	1.60911e+06	1.31202e+07	792985	1.49966e+06	2.58569e+06	1.09022e+06	1.14422e+06	1.98143e+06	408479	2.1792e+06	2.32633e+06	2.10748e+06	3.50054e+06	3.56002e+06	2.06038e+06	617810	774279	2.01442e+06	1.04456e+06	1.23839e+06	843163	1.33912e+06	707405	353150	555582	2.00825e+06	2.63048e+06	2.05592e+06	930829	1.80883e+06	1.64149e+06	747799	2.21436e+06	513465	486743	1.21945e+06
O60825	6-phosphofructo-2-kinase/fructose-2,6-bisphosphatase 2	PFKFB2	6	5	2177.64	1405.47	1999.56	1011.05	3518.54	3049.02	1617.86	808.954	1082.54	6013.18		1725.63	1216.96	205.056	489.374	1475.73	3006.58	4495.65	582.25	903.297	2590.09		638.317	2555.29	1023.08	462.421	682.065	708.823	1198.94	979.291		341.559	1436.63	1209.66			4266.29	1584.79	661.239		3649.97		5440.5	1348.78
O60826	Coiled-coil domain-containing protein 22	CCDC22	8	8	2751.66	2112.47	2021.67	3471.6	3583.17	2625.93	2798.8	2717.27	2704.52	1685.68		1398.48	3385.74	2326.44	1809.65	2529.19	2840.32	3545.96	4230.41	3499.03	6849.72	5280.51	4425.15	2794.76	1152.97	5935.34	2216.85	1851.53	1618.43	3698.33		831.032	1674.45	2298.5	3635.01	463.879	4500.04	2652.91	2505.26	2833.64	2730.83	1883.54	1725.24	681.631
O60828	Polyglutamine-binding protein 1	PQBP1	3	3	2891.75	6572.88	10874.7	7600.89	4098.74	10557.4	3459.49	6924.69	14897	1740.6	42032.7	7514.43	10611.6	6643.97	13701.4	7560.63	11426.5	38911.7	25876.9	12119.3	7151.32		23498.9	7494.36	1449.43	2316.96	9108.38	5509.69	13074.1	5297.59	3427.68	6198.09	2838.07	5962.62	968.996	10346.6	8265.26	3972.6	9610.75	7753.48	700.936	8099.93	4267.12	2736.22	3429.39
O60831	PRA1 family protein 2	PRAF2	1	1	29281.2	10632.7	11333.9	9682.73	36319	17240.6	10278.7	13835.9	21196.8	41613	110355	13963.4	6640.01	12832.1	4491.4	22624.7	2875.66	31086.8	3763.69	5417.51	99959.7	85934.3	7064.33	14688.8	53157.4	19606.9	9239	8966.71	28111.6	17939.8	36266.4	8026.98	14739.9	19585.2	47891.6	6883.5	9198.54	24094	8370.76	9430.57	50994	56823.1	29546.3	27273.1	43369.4
O60832	H/ACA ribonucleoprotein complex subunit DKC1	DKC1	6	6	2195.79	2064	1109.76	1392.28	19140.1	420.658	1098.53	2464.43	2637.05	4143.08		1231.78	726.641	1987.95	742.697	1682.39	754.32	300.964	274.956	513.912	14616.7		1057.71	191.088	1746.44	12515	2750.56	2782.98	3285.8	6065.88		1180.4	2611.96	3510.86	1976.34	36378.9	8390.66	5629.06	11169.9	321.713	4403.63	5587.08	3778.98	2216.39	5782.4
O60841	Eukaryotic translation initiation factor 5B	EIF5B	13	13	2907.43	4868.53	3306.68	3443.32	562.377	6508.79	3019.01	4828.05	6197.9	631.218		2607.21	4653.87	5369.56	6642.53	3115.23	8865.61	6072.02	5790.24	3726.85	863.609	1174.93	3005.95	1113.27	1924.9	4700.02	3855.49	5592.41	10235.4	5275.21	1753.44	4929.8	3854.73	5189.01	260.042	2724.56	3218.86	3954.61	8504.29	3586.69	1517.86	879.679	2975.26	453.892
O60861	Growth arrest-specific protein 7	GAS7	4	4	1013.87	292.918	896.971	413.078	7852.49	191.334	543.813	453.277	4691.62	3258.81		1303.36	70.3445	164.692	779.447	829.206		7482.67		2109.48	6418.39		2488.05	3225.02	4004.14	1792.6		726.898		227.509			2055.15	377.454				1668.45			4845.96		5016.37	9028.64	1714.91
O60869	Endothelial differentiation-related factor 1	EDF1	1	1		14108.3	3174.64	3462.51		1289.53	1100.12	23956.2		46927.6	179027	1723.07	1720.98	6844.14	2505.36	1025.75	3187.52	859.148	1691.23	12764.2	41701.8	102253	262.997	509.007			790.482	723.881	569.363	572.629		1384.81	757.627	388.866	10388.3	82795	970.94	1804.57	1164.51	14530.6	3711.71	4268567	881.181	869.037	691.815
O60879	Protein diaphanous homolog 2	DIAPH2	2	2	608.6	1043.6	769.519	110.334	3375.62		1403.61	212.58	1950.16	1475.97		1199.4	2237.03	2925.51	1540.18	1449.24	2089.09	1488.24	2826.83	776.812			820.882	1031.67	2185.72	8158.33		1363.43		1983.3		1284.93	2069.45	1560.78			2472.29	865.243	1835.19	2135.94	5850.86	1909.31	3215.63	6743.31
O60880	SH2 domain-containing protein 1A	SH2D1A	2	2	704.903	1488.84		285.61		119.139	1600.27	112.923		380.943		1796.03	1386.55		393.607	281.407		4477.78	1043.95	13607.6	2197.1		3867.01	6655.28			1553.75	727.662	3656.53	6793.83	7671.74	2388.9	658.355	1175.42				3200.37		6152.8	4354.85
O60884	DnaJ homolog subfamily A member 2	DNAJA2	5	5	1	1606.3	1604.36	801.003	1224.81	490.164	589.696	784.925	735.121	1381.04	1818.29	1429.29	1767.12	1234.28	1508.71	778.369	957.114	88.8517	1438.53	2199.51	2488.11	636.064	1632.01	1442.53	909.015	5076.02	1066.49	2118.99	2170.81	1223.05	1568.85	1619.95	720.634	1326.47	1403.43	1777.53	539.769	847.321	1381.05	331.647	207.942	1193.11	1038.99	1682.2	2394.17
O60885	Bromodomain-containing protein 4	BRD4	5	4	460.823	967.547	1231.58	982.244		1534.5	732.56	1508.66	3564.25			1074.58	3973.85	1608.32	1649.83	389.995	2231.7		585.076	1763.99			3650.59	838.738			168.737	405.338				94.3524		315.661			2404.09	498.893	2459.19				484.916	156.629
O60888	Protein CutA	CUTA	4	4	57800.4	18033	24831.8	18052	82048.8	55194.8	47188	16501	48831.5	65406.8	148988	35449.5	48955.8	23184.9	29898.5	46100.9	37787.4	62065.7	127249	23151	71505.4	65772.9	31471.5	52025.3	74629.8	41938.3	19234.4	15226.9	65960.8	28592.5	100310	25705.1	40280.3	62055.3	180279	110919	10494.2	12846.2	14737	24458.3	55201.2	125500	22988.7	95958.4	139477
O60925	Prefoldin subunit 1	PFDN1	3	3	16987.3	5660.8	11226.2	5436.47	21046.6	7481.59	6332.53	4800.56	12265.9	37119.6	141978	8057.51	16302.5	6638.43	8714.47	6725.9	6689.94	16161.9	16981.6	8084.57	46530.3	32567.9	7732.87	6475.15	25659.7	10697.3	8113.98	6936.04	8158.58	10913.1	29011	13840	10069.9	8775.63	39658.2	45300.3	10476.3	10385.6	15509.9	14110.1	35942.8	44452.2	6867.79	25467.2	54289.7
O60927	E3 ubiquitin-protein ligase PPP1R11	PPP1R11	2	2																		203.705	346.144						1791.35		1	431.044	2293.6	208.21	1208.48	853.984	542.456	2895.2			197.228	104.119		1	1		745.467	1087.73	4309.48
O60934	Nibrin	NBN	5	5	4534.18	3405.7	4674.25	2242.17	1752.04	4316.56	2014.24	3380.04	8159.37			2942.05	5017.42	4688.02	3935.89	3664.9	4386.35	13960.3	10767.3	7144.86			5530.88	2455.52	915.252	678.671		2809.86	3481.15	623.741	4218.05	2262.68	1824.49	3062.46		8821.25	4609.71	2217.75	2841.87	3267.41			1750.67	430.997
O60936	Nucleolar protein 3	NOL3	4	4	2690.26	2412.34	2645.3	2447.69	11131.4	4607.67	2809.42	1407.3	7829	10727.1	8699.3	2253.01	2287.35	952.178	1571.82	3305.28	1418.02	5099.54	2003.78	2808.28	11535.4	8974.95	2131.85	3480.85	5611.43	4816.66	4080.92	1163.36	1853.5	3463.12	9391.62	2409.23	4509.14	1854.35	19188.6	14273.1	564.152	2053.51	1825.11	8487.61	4403.87	39129.1	3778.93	8957.54	27919.2
O60938	Keratocan	KERA	1	1																									707.137	17827.2	2614.42	675.668		752.972	2237.26		635.376		47084.3	28291.6	88.4843	2843.42	1627.84	5875.58	3447.92	4306.07	2002.91	572.377	9042.79
O60939	Sodium channel subunit beta-2	SCN2B	2	2		854.128	167.282		8288.11			168.97	626.579	3552.15		1149.82			287.077			5834.41	5828.95		2636.29				3766.2			235.993	1026.57				4647.25	636.199				149.738	166.972		5523.65	713.286	4411.03	18693.6	36680.7
O60942	mRNA-capping enzyme	RNGTT	5	5	5483.33	1501.51	2294.08	924.331		1959.21		358.749	939.522			1485.23	2394.78	2346.03	1972.81	1782.91	2512.29	2361.56	11843.1	989.363			1981.58	388.195			1819.98	2174.15	884.026			893.426	471.954	1222.36			2227.67	1011.13	2074.46				725.23
O75027	ATP-binding cassette sub-family B member 7, mitochondrial	ABCB7	2	2	2668.45	753.815	2575.16	2015.66		392.201	243.871	941.158	3081.11			818.562	1724.9	1318.78	585.553	2033.18	1323.68	1074.26	3604.83	1086.92		1582.86	1728.47	854.073			197.563	469.29						521.504			948.733	893.291	885.189				256.872
O75037	Kinesin-like protein KIF21B	KIF21B	2	1	837.311	1142.74	902.291	554.482	4674.89	1134.52	233.701	769.563	124.191	3856.26		719.921	555.762	737.507	1582.75	663.076	1614.53	3452.65		980.585	1220.19	2487.13	419.316		3343.99	973.228	1	478.182	733.326	189.522	69.3173	62.6941	3280.64	800.945			508.595	1	10.9447		5012.82		2574.56	3517.94	3260
O75044	SLIT-ROBO Rho GTPase-activating protein 2	SRGAP2	7	4		338.238	365.038	780.727	888.705	2654.59		253.371	692.534			286.598	470.307	37.4445		311.999	613.541	1668.41	3456.85	551.641	2722.2	1769.62	651.361	707.422	229.84	2273.59	734.891	76.7028	402.289	697.644	386.649		483.038	247.103	1766.36	1.43138	398.627	96.777	130.504	1	437.709		595.524	847.288
O75061	Putative tyrosine-protein phosphatase auxilin	DNAJC6	10	10	714.908	2740.21	2532.66	2125.33	21817.9	180.708	1	304.821	5229.03	12741.3	85500.5	2843.52	1	425.544	1181.88	2688.77	788.086	7667.67		1611.42	40565.3	13483	1268.88	6354.31	8992.07	3833.8		1240.47	1				3269.69	3500.23	4.32244	10.821	616.275	802.935	3121.21	766.133	6496.4	6852.58	5700.2	7970.32	20378.3
O75064	DENN domain-containing protein 4B	DENND4B	3	3	2513.22	1263.52	912.714	2064.32	3034.47	3186.34	2156.13	1129.98	2911.38			1236.91	291.61	397.375	998.59	1591.92	2021.03	1542.56	7580.62	867.629	4940.79		1672.71	2089.08	2457.88		2943.1	1589.16	2457.7	4302.23			1810.86	2061.7			1696.29	762.448	3582.29				1270.5	787.083	1978.65
O75071	EF-hand calcium-binding domain-containing protein 14	EFCAB14	1	1	5789.85	1437.56			39790.1			1045.62		2247.09	546.423			13326.8				14214.6					17760.1	5303.06	4435.57				1960.33		2245.43		5572.97					125.92	2610.05		1110.56	1139.42
O75077	Disintegrin and metalloproteinase domain-containing protein 23	ADAM23	2	2		490.287		154.463	3138.42		162.75			2808.98		469.861									3793.09	1561.5	363.442		1264.98								321.008								772.875		3048.8	2920.12	1118.58
O75078	Disintegrin and metalloproteinase domain-containing protein 11	ADAM11	2	2					1481.06					993.661		36.7999	591.043					1309.4	914.642		23893.1				1997.56			993.424	2010.69	1804.39			180.432		8755.5	2759.29		1521.02			1		1790.19	3062.14	4234.98
O75081	Protein CBFA2T3	CBFA2T3	1	1		205.355	410.029						859.9			245.991	1384.19	513.881	308.151		1109.69		628.248				887.011					92.9643									115.843		309.98
O75083	WD repeat-containing protein 1	WDR1	16	16	29077.2	14300.1	14361.4	15668.6	32202.7	30050.8	25965.3	20851.6	36157.3	56625.4	168111	15120.5	12812.4	19156.6	16528.9	17923.6	22112.7	23638.8	33945.3	20153.5	73334.2	67719.9	24973.2	31442.3	19140.4	32327.7	20697.1	10065.1	15848.9	16373	38635.2	12232.7	11764.3	12680.2	64518	42478.6	10182.6	23775.5	13328.6	18212	25753.5	33070.9	10415.5	13533.2	54532
O75110	Probable phospholipid-transporting ATPase IIA	ATP9A	5	5	670.387	1625.18	427.665	1073.13	6010.5			1372.02				1180.34				1074.36	88.0742	7704.83			17526.5	2179.51			4502.24	1160.42		1609.33					4468.27	3692.26		1.28321		1991.46	649.354	4687.99	7308.27	7549.96	3578.18	3076.69	7392.04
O75112	LIM domain-binding protein 3	LDB3	10	10		662.155	8320.02	18098.8				1155.57	227.109	11817.4	4578.3		15100.8	19414.1								1.55594			28778.2	72857.6	28879	3044.5	4420.2	16677.9	56018.2	3777.7	9198.14	3713.35	396522	127427	5435.64	21563.2	15596.9	53891.6	25302.1	368099	11679.6	14028.7	47260.1
O75113	NEDD4-binding protein 1	N4BP1	3	3	2526.62	987.62	851.939	1519.03			2318.77	572.519			12940.8	926.918	1181.26	659.371	700.517	775.034	600.461	230.019	4521.21	333.199	2.1101		689.804	2149.98				1040.15		1454.99			748.385				494.284	614.374					604.976
O75116	Rho-associated protein kinase 2	ROCK2	8	5	4477.22	2233.68	2335.41	1953.2	5565.34	5741.04	2614.82	1514.21	3733.66	12503	22375.3	1053.66	1541.18	3581.02	1725.43	2328.79	2541.1	12879.9	1487.23	4263.5	14868.8	6911.63	2644.52	2287.62	3798.9	7638.88	7062.18	3011.01	1803.06	2450.74		2240.15	3139.34	3105.45	1310.32	5707.87	3784.21	3402.1	5637.67	4311.78	6471.87	3811.35	4406.84	3044.48	1051.24
O75122	CLIP-associating protein 2	CLASP2	10	10	1102.63	1600.43	2950.23	1900.42	6201.12	1990.28	1502.08	1113.44	3603.64	6387.75	87082.6	926.85	1127.67	1975.96	1032.25	762.815	1223.33	9680.71	1996.47	1239.51	17309.3	6907.9	3087.29	1570.15	2350.85	588.205	704.927	982.811		1			1065.27	640.854			668.814	564.817	1155.09		1071.41	2.67466	2641.04	2081.44	2476.29
O75127	Pentatricopeptide repeat-containing protein 1, mitochondrial	PTCD1	3	3		716.351	1144.6	1100.33				121.072				329.405		732.803	956.782		319.244						1281.5					84.2655									310.892	1
O75129	Astrotactin-2	ASTN2	1	1					400.145		231.156																										197.315
O75131	Copine-3	CPNE3	8	8	23479.8	5689.86	19558.3	11849.8	9979.93	16415.5	8767.35	9619.13	8701.98	18577.6	207111	6414.47	11866.1	13205.4	10216	8693.16	7398.3	2991.16	12563.6	5862.38	52156.9	47975.6	11795.1	9220.56	19047.5	9656.91	13499.4	5590	10737.7	16480	63023	13857.9	6024.57	16890.7	32496.8	59297.8	7181.81	6061.35	9493.26	10139.8	14574.7	19400	7878.3	8346.42	47518
O75143	Autophagy-related protein 13	ATG13	1	1		20.064	197.417	939.242	181.865		61.5576					74.7134	199.205		154.216	1	222.954											210.699				45.1267	56.8948										189.981	96.2477
O75144	ICOS ligand	ICOSLG	1	1	3032.6	2246.47	1014.47	2855.75	3693.59		1257.5	868.641	6808.55	24055.9	7976.8	1277.59	7085.53	5504.54	1150.47	2356.59	434.601	3093.51	333.263			3395.24	794.774	5620.45	2757.22			1231.99			1946.8	521.633	7278.47	517.242			73.2188			1002.79	10460.8	3023.32	8301.7	10975.9	13672.1
O75145	Liprin-alpha-3	PPFIA3	15	13	1863.92	515.36	2869.06	852.789	11886.5		189.855	253.619	3385.45	1099.61	55.6739	1962	369.585	841.343	1846.86	2153.27	437.759	2595.55	821.18	123.621	8140.02	1105.53	354.487	2156.16	1778.38	1810.42		533.218	331.657			5.56023	566.728	2307.93		4388.76	152.847	328.596	620.981	1	2196.59		1070.7	2502.78	6681.45
O75146	Huntingtin-interacting protein 1-related protein	HIP1R	11	11		858.173	984.204	2359.94	742.072		871.15			225.15		257.945	674.318	2938.39	843.481	581.53	502.344	3583.34				3696.48	1	161.454				681.979				137.378	910.367	2141.14			2651.98	128.489	627.103		1598.9		1370.77	2083.38
O75150	E3 ubiquitin-protein ligase BRE1B	RNF40	11	11	997.521	937.57	1831.2	1264.32	592.541	2634.11	756.249	1025.69	3135.12			1026.95	1462.97	966.684	1960.9	1436.99	1715.83	7232.69	3897.55	2806.05			2567.08	1522.87		645.57	360.845	706.74	513.214			415.88	51.0048	343.767		1508.44	2287.15	749.849	2292.4	788.648			196.842
O75152	Zinc finger CCCH domain-containing protein 11A	ZC3H11A	8	8	1099.53	2496.87	3862.87	3703.65		4581.68	714.261	2474.04	9874.67			1309.43	3324.51	4507.06	2641.16	1233.08	4568.67	2108.82	2379.51	1234.12		2706.06	5611.51	3170.86	1	32209.2	4969.08	5726.97	1122.39	20853.9		3980.77	7387.07	3631.51		16134	7572.1	2523.08	8374.3	2165.2	3085.19		3487.25	2372.33
O75153	Clustered mitochondria protein homolog	CLUH	16	15	5744.02	5926.77	2787.01	5010.13	3879.32	4680.54	3113.27	4101.43	3633.83	1319.65		3260.45	2554.17	4348.39	8555.55	4178.29	5584.51	6626.82	5421.79	2372.28	1770.8	1289.93	6398.83	1104.97	1793.56	3987.01	3272.58	4103.58	3644.47	1819.48	1.97606	3642.93	3014.13	2656.1	2774.73	10510.6	3012.28	2522.61	2310.44	2551.39	410.878	1.13281	2857.9	946.614
O75157	TSC22 domain family protein 2	TSC22D2	1	1	3168.91	612.86	4114.46	3024.06	26256.3	8776.5	3457.77	312.096	4702.76	1765.14		4671.73	5583.37		3692.46	5227.49	3607.59	6382.31	12634.7		4518.2		2822.21	8550.58	15706.6	3396.77	1041.89	1817.34	4779.35	5838.68	1803.97	3150.75	7616.04	8867.2			1599.47	404.919	3944.4				5186.35	8113.49	42764.3
O75165	DnaJ homolog subfamily C member 13	DNAJC13	20	20	4173.48	1409	1005.72	1620.15	1002.58	1115.02	2030.78	2445.07	1996.18	3058.09		969.377	1132.59	1709.88	868.012	1740.48	1311.48	2516.6	567.693	2037.08	3914.65	3483.69	1975.59	1580.62	2087	1409.08	1950.11	1163.08	2742.8	2624.68	4902.7	880.758	977.465	2198.37	4092.62	708.015	2749.17	3070.69	1346.27	6090.14	2815.19	2145.71	1886.58	1787.48	4332.34
O75167	Phosphatase and actin regulator 2	PHACTR2	1	1		1595.53	2404.94	1831.8	3048.1	4145.95	1493.62		3678.56			2687.01			1956.87	2525.41	1621.62	9222.38	6503.46				4614.1	2998.57	886.919					717.833			759.397				739.365		1441.21				609.008
O75170	Serine/threonine-protein phosphatase 6 regulatory subunit 2	PPP6R2	5	5	2900.58	1229.55	1643.73	1222.43	10704.2	781.641	2869.82	1798.69	4249.61	2053.81		2267.64	1530.44	563.652	2494.09	2463.79	2197.92	10770	8470.36	780.387	18536.8		3235.78	2773.59	8018.56		1423.91	680.948	2018.52	2745.9		1125.14	1184.71	1352.94			1080.68	421.885	2210.19				1589.86	1896.12	5160.86
O75173	A disintegrin and metalloproteinase with thrombospondin motifs 4	ADAMTS4	1	1				405.599					1889.99	383.009						344.023							366.2
O75175	CCR4-NOT transcription complex subunit 3	CNOT3	3	3	1022.24	2419.68	1985.72	3865.93	2978.79	4966.87	1620.33	2253.88	1461.1	917.222		3134.61	3219.89	3332.89	6151.87	4097.05	4745.7	3528.26	10888.1	2644.02		3494.11	2081.28	2317.18	665.399	1125.57	431.79	1421.43	2457.41	2106.71		1137.84	1714.23	1635.88			4481.43	1703.8	3451.7	177.235			1249.25	400.741
O75179	Ankyrin repeat domain-containing protein 17	ANKRD17	6	6	1480.56	2336.01	4051.67	2830.71		3562.43	1441.42	1180.64	1678.8	2.53032		1036.87	3250.3	2513.2	4811.22	1016.69	3899.7	1916.91	1781.53	1756.57			2337.31	2016.28		187.229	699.651	1232.86	825.548			1320.35	1160.94	1740.93	1.13242		1149.52	997.917	1916.2				886.36
O75190	DnaJ homolog subfamily B member 6	DNAJB6	7	5	871.238	2554.66	2170.14	2053.79	5029.05	737.895	1469.05	2173.5	2447.58	10928.6	28.3399	2588.71	1311.43	1193.33	2417.86	784.01	1534.23	2693.27	554.043	1838.37	8214.84	419.462	2160.03	706.423	2821.94	1351.21	829.877	1437.62	874.064	317.428		513.729	1194.58	753.59			2288.04	804.31	1321.53	2510.62	4319.2	924.73	3058.11	11799.8	12403.1
O75208	Ubiquinone biosynthesis protein COQ9, mitochondrial	COQ9	3	3	266.726	280.441	1024.58	580.312	1993.59	153.294	111.5	1	2702.32			478.645	563.88	106.948	601.485	262.306	1306.87	778.859	510.796	1			1	33.9382	1.15753	1736.1	113.998	644.929		127.435	1	82.3973	280.986				1	1	179.595	1	1.34538	154.255	244.844	1966.45	1017.01
O75223	Gamma-glutamylcyclotransferase	GGCT	7	7	2276.89	1546.01	3652.64	1222.66	5547.49	2377.21	4261	1173.02	604.482	19396.1	268885	3983.05	2854.53	700.528	1851.47	1426.97	722.586	2634.37	7446.99	2940.64	13970.7	73100.1	1849.52	2007.23	10740	4964.35	2665.57	2016.4	6733.96	5411.43	15955.5	5106.83	4370.82	4168.49	57126.1	102809	3565.63	11007.2	2865.74	10942.9	16706.4	27960.1	2616.9	13233.2	18087.6
O75251	NADH dehydrogenase [ubiquinone] iron-sulfur protein 7, mitochondrial	NDUFS7	2	2	6564.46	3276.79	4581.03	2244.53	10461.2		590.06	1642.09	5306.61	4352.19		2058.94	1303.88	4075.7	1230.35	1476.74	1741.04	2588.81		704.607	5926.77	951.607	2387.14	1688.44	596.309			1513.48				277.577	144.75				1044.43	3204.67	987.507		637.232	480.368	2501.07	4382.85
O75306	NADH dehydrogenase [ubiquinone] iron-sulfur protein 2, mitochondrial	NDUFS2	11	11	8029.09	2327.91	3780.28	3285.46	13689.9	1638.6	2236.17	4639.31	9486.7	11201.7	90953.1	2578.71	3127.48	4375.41	1871.88	4973.91	3687	6043.2	2491.08	6011.34	75026.2	32847.7	9631.02	9287.86	8287.53	14261.5	5351.86	5786.14	5314.39	11115.9	8807.91	4883.81	4755.97	7885.39	13047.6	14564.5	6996.8	9713.06	11968.1	11150.6	11893.3	12142.9	8244.2	10100.2	18847.3
O75312	Zinc finger protein ZPR1	ZPR1	9	9	2918.28	2284.15	6534.78	4807.87	749.533	6461.11	3395.81	1401.3	9393.33	1837.92		3082.8	2901.15	2889.47	6427.84	3473.72	4874.86	8803.01	11084.1	3538.45	5143.35	20187.9	5076.95	5247.05	4609.39		2946.23	2457.35	3467.54	5728.73	7346.36	3535	2671.17	4783.58	7387.99	16935.9	1187.24	4065.56	4130.56	3894.97	1911.59	2591.81	1579.73	1347.24	21880.3
O75319	RNA/RNP complex-1-interacting phosphatase	DUSP11	1	1		2093.19	775.276	415.559				2398.03		13.4851		679.75	1863.87	5187.68	892.376		698.137		637.778	1569.68			3768.02	214.725			491.553	1779.83				413.098	97.759	860.376			1029.68	1424.55	3149.3				1075.69
O75323	Protein NipSnap homolog 2	NIPSNAP2	3	3	17590	14622.4	34169.8	10746.5	39349	12041.8	11272.4	38263.2	43130.5	128821	1.01441e+06	11522	11156.1	4489.98	12393.7	34846.6	9871.28	2883.42	25108.6	29158.4	402777	152690	21361.1	26529.3	81732.8	52115.4	16533.3	14892.1	27961.1	66641.9	49415.7	14070.6	31261.3	31171.3	73343.4	40910.8	17623.8	23976.5	51973.9	43014.5	78635.9	107795	20332.9	33758	74814.3
O75326	Semaphorin-7A	SEMA7A	3	3	7334.77	1117.82	1182.23	4226.35	3179.83	4980.24	620.407	1140.07	3498.6	1728.01	6239.28	400.765	6345.8	1955.64	1870.35	2155.63	2573.28	3100.81	7086.84	2842.52	1093.64	1023.46	3282.71	1607.84		4667.22	2266.2		482.224	1733.37	3750.35	983.054	1636.45			5238.45	5685.03	1183.22	11448.8	1054.24	3786.65	1750.93	2293.92	4826.56	4302.09
O75334	Liprin-alpha-2	PPFIA2	8	7		888.892	633.944		4510.46			161.607		849.288		456.022					1	55469.4			8981.49		731.585	1142.85	535.787			185.31					882.204	223.725				370.463			1		1072.32	1583.13	1424.47
O75339	Cartilage intermediate layer protein 1	CILP	13	13		609.607		909.468	1			332.498	2299.04				435.188	14224.9	51.9228			1		378.104				5369.74				116.169		1											427.128		313.839
O75340	Programmed cell death protein 6	PDCD6	8	8	25659.4	11266.7	11123.1	15401.2	23690.2	12202.7	8766.49	10548.1	9048.9	36639.2	140023	10184.6	14283.4	11626.3	6748.86	10212.8	11914.2	14016.7	8260.05	11994.2	26184.9	40818.1	16191.3	10949.9	19972.9	7610.21	16560.3	7412.8	10282.1	9713.61	23598.9	9171.43	10555.9	9835.07	12365.4	30850.4	3794.28	8822.2	8720.03	12869.5	17104.6	26040.4	8521.72	21672.4	34149
O75342	Arachidonate 12-lipoxygenase, 12R-type	ALOX12B	4	4		816.559	270.851					1527.53		3250.31	52474.5		1482.07				918.411					49039.7	292.801	9196.15	373.799					578.422		480.204	300.04		10669.9	34861.4		840.083	2541.68	386.881	1736.92	5823.2	366.708	968.234
O75347	Tubulin-specific chaperone A	TBCA	5	5	20322.1	9686.19	7279.76	5512.89	19547.4	12683	8585.61	7445.02	14466.2	38501.1	144865	11561.7	9574.04	10496.9	13512.3	14234.3	15572.4	13934.4	23425.3	15230.6	16812.8	20415.1	14033.5	27607.6	14477.4	4190.25	8160.24	2979.22	22997.2	11217.9	38096.7	15961.6	7252.79	11927		11165.2	2393.53	3436.95	4218.05	11753.3	10251	5405.82	4226.58	16982.3	66104.3
O75348	V-type proton ATPase subunit G 1	ATP6V1G1	3	3	12585.9	10486.3	10377.2	8878.68	12530.6	14612.7	15052.8	8629.19	26117.5	26522.6	8813.19	8598.66	7902.59	10290.5	12696.6	12243.3	6507.74	20088	13291.2	16506.8	34933	22656.6	38736.7	17877	15376.2	10770.1	12625.8	9625.75	15579.2	26704	43475.5	10934.6	7013.43	12748	21855.4	28886.2	6180.47	6074.36	4969.4	42737.6	12841.1	19138.7	7072.35	11557.8	49085.4
O75351	Vacuolar protein sorting-associated protein 4B	VPS4B	9	7	4693.96	5859.95	5193.67	5420.49	3948.84	7688.21	4586.38	3931	9449.2	7079.92	30588.9	3442.21	7003.54	5907.03	6440.39	5298.61	6837.35	4478.3	5539.87	7139.28	17991.1	6484.4	9451.06	6941.07	3148.7	3873.98	5368.43	4894.58	5014.61	2851.53	13565.7	3328.41	3679.06	3763.92	2291.78	2508.56	3893.65	4632.16	5060.02	4989.73	4491.91	4953.24	3419.42	3589.2	11415.3
O75352	Mannose-P-dolichol utilization defect 1 protein	MPDU1	1	1	11250.3	1835.48	1173.18	1424.14	1366.51	2557.06	1475.63	2543.22	3378.4	1198.61		678.466	1070.91	2571.05	562.014	2377.17	1450.09	1305.01	3394.09	554.875		892.981	550.088	1371.1	399.818	1570.19	350.278	1780.64	3660.17	6775.91	1500.62	1575.72	1037.1	1587.64	1.90343		3596.29	4174.74	1177.38	2059.84	1458.96		3106.64	1815.89
O75363	Breast carcinoma-amplified sequence 1	BCAS1	7	7		1898.88	1154.61	2330.56	4386.24			823.455	19407.5	7505.14	43780.3	536.34	1		1208.41	702.779	1859.84	2869.95	237.103	1758.55	10850.3	15191.3	4740.54	822.333	1326.08	1268.99							6088.44				942.093		1393	3792.82	19329.4	19588.3	9624.75	15616.8	21138.7
O75366	Advillin	AVIL	4	3	198.759			1379.27	1.72939	4380.74	3859.42	3160.52				10951.2	937.403				666.168	46.5413		3051.31				11438.8		1268.28			1083.04								483.535	435.122			5268.35			975.431
O75367	Core histone macro-H2A.1	MACROH2A1	10	8	41773.2	13634.8	14217.1	13493.6	5269.4	16951.6	8274.91	23441.6	31788.5	20858.8	142358	7079.33	18331.6	32454.2	11908.9	12982.7	20282.6	11833.9	11050.3	20353.8	48145.2	60028.5	35831	20809.5	13232.7	18401.4	22039.2	22983.6	13990.4	15449.4	12992.8	15898.4	5977.5	8838.09	63361.4	67820.6	36987.3	26331.3	61059.5	19421.1	21784.3	31222.4	13619.6	10286.6	18147
O75368	SH3 domain-binding glutamic acid-rich-like protein	SH3BGRL	7	7	25674.5	11853.8	20854.4	24686.3	26392.1	44219.6	35511.5	13150.9	39088.4	49931.5	45690.4	22283.2	45608.2	14835.2	15849.5	33905.2	16507.2	28911.5	117864	25810	54184.6	45466	26250.3	55786.6	69657.8	49637.2	75185.2	21907.3	82906.8	73724	265650	40213.8	40952.8	61861.6	165633	75015.2	18290.8	17578.9	31854.9	42432.8	41666.8	81953.2	16165.6	31893.8	154534
O75369	Filamin-B	FLNB	29	29	9171.28	4032.53	3634.62	4522.71	723.045	9329.9	4111.61	4860.2	17004.1	5023.36	37220.9	2101.64	4051.44	5869.62	4183.65	5607.94	2816.05	6860.38	1645.2	3304.26	3211.32	12684.9	4261.74	5544.38	1958.93	13313.8	4418.95	1843.38	3579.61	1227.61	5600.07	2920.27	1230.37	1789.41	13936.3	20986.7	2862.13	3456.72	1192.36	3416.05	5936.88	11315	3270.86	2218.68	5394.8
O75376	Nuclear receptor corepressor 1	NCOR1	5	5	728.857	1674.56	307.148	584.944		1750.14	847.019	2271.89	2541.42			1056.27	1525.87	2161.86	1458.29	1239.43	2760.51	153.977	1531.86	1093.21			3021.8	1834.5			1	879.347	1055.7			55.2099	75.0001	749.762			5024.72	1194.76	1264.46				548.107	158.529
O75380	NADH dehydrogenase [ubiquinone] iron-sulfur protein 6, mitochondrial	NDUFS6	3	3	5657.91	3850.94	3918.12	2084.28	23199	3607.05	2046.3	3623.27	6850.3	9398.26	62436.5	4957.21	3615.86	909.695	2983.12	1184.92	1991.98	6021.23	3375.25	8816.98	44658.7	9322.72	4673.36	7712.04	8535.89		2960.82	1062.07	1844.79	4126.58	5736.37	5629.07	5580.24	4925.12		1894.96	5328.04	5995.71	7601.86	6890.2	6367.3	12413.4	10477.3	34002.5	152081
O75381	Peroxisomal membrane protein PEX14	PEX14	3	3	2082.31	2407.09	2942.5	1561.07	5207.72	1660.49	1816.91	590.182	7031.97			1043.12	1504.42	1782.15	1601.87	661.642	1819.91	5018.21	1551.38	1741.88	3150.81	1013.96	4383.59	2497.46				199.806	1.26545				197.139				745.893	735.703			1030.96	1699.08	340.535	912.27
O75382	Tripartite motif-containing protein 3	TRIM3	7	7	3699.76	1491.22	1602.44	1138.38	6689.81	1431.41	4202.04	3221.38	4637.46	8146.87		1530.07	1507.62	341.001	4596.32	2471.93	2909.62	5120.75	507.396	3237.08	11171.5	13070	1523.51	8330.39	6701.96	6827.03		2029.09				256.9	1767.75	1930.03			4366.17	2595.01	1817.64	718.535	3933.41	7425.78	2432.72	2866.27	451.032
O75390	Citrate synthase, mitochondrial	CS	10	10	22338.4	22183.8	28851.4	22019.6	68113.3	19355.7	19085	27540.4	64904	50750.5	402661	19245.9	16146.4	21608.3	18806.8	17650.8	17184.9	15109.6	23212.4	38206.4	212782	61654.9	32894.3	29613.2	41636.8	32348.8	21060.2	20513.8	25729.8	27152.4	17159.1	20272.3	11847.3	23813	36973.5	24513	24279.1	24951.6	27294.2	24409.5	24413.5	142323	21846.9	32241.4	70852.6
O75391	Sperm-associated antigen 7	SPAG7	2	2	4397.6	1023.1	582.542	997.663		1915.98	2331.15	1445.58	2056.63			2059.68	2155.61	1705.58	3910.25	740.431	1146.01	1957.51	2912.8	796.596			1854.24	557.524	2065.04	4513.96	1100.57	666.936	3148.76	3750.38	783.347	5459.85	1177.69	4851.44			2276.61	1270.45	1526.4	2465.83		1336.98	1507.77	1442.39	605.377
O75396	Vesicle-trafficking protein SEC22b	SEC22B	6	6	12029.2	6885.52	5499.86	9854.4	7361	8972.59	8187.5	13640.6	7658.43	13799.4	13126.3	3969.08	5661.71	6976.75	5335.72	9729.13	6012.98	22125.8	12941.2	9971.78	34887.5	31810.2	10775.4	3940.89	12697.3	17310.5	16286.8	12631.2	12719.6	23775.4	19001	11535.7	10235.3	10282.1	28112.6	30387.4	25074.4	15863.7	25518.3	19801.3	13713.8	23475.9	10488.5	6556.35	9232.38
O75400	Pre-mRNA-processing factor 40 homolog A	PRPF40A	8	8	3431.37	2741.02	5202.75	4442.94		4423.92	1291.44	4874.28	6423.82	1082.3	81331.1	1961.21	4764.35	4878.95	5276.81	2793.9	3700.98	708.734	3597.45	6865.36	385.339		4251.11	1982.77	1	5603.76	11950.7	4042.51	1279.32	1892.63	3488.43	1161.76	735.484	2603.39		15387.5	8158.48	4116.24	3655.29	2333.25	1418.84	1.42419	804.574
O75410	Transforming acidic coiled-coil-containing protein 1	TACC1	6	6	1683.51	2151.58	3666.3	3309.55	5247.08	4208.25	3758.1	2192.47	5962.09	8591.24		2629.53	1475.73	2777.92	4927.42	2227.92	2560.13	8329.04	2224.36	2257.59	11773.3	8597.58	7256.87	2965.97	864.542	3161.25	1670.58	2651.12	1177.67	1611.68		815.907	1557	2230.92		1996.37	3323.51	1455.51	2787.72	4637.13	6074.76	5284.86	3217.7	1865.16	757.187
O75414	Nucleoside diphosphate kinase 6	NME6	1	1	5422.16	1140.68	171.699	3240.66				2131.69				1733.67		4035.84	698.297	1290.7	1928.65			5103.68			3095.7	569.271			1075.38	741.598	3107.16	2016		1657.05					2709.25	1596.97	2220.94
O75419	Cell division control protein 45 homolog	CDC45	3	3	1885.15	213.64	841.669	452.584									289.84	427.425	126.321		467.66							90.316				719.404				306.65					298.714	760.664	360.93				137.703
O75426	F-box only protein 24	FBXO24	1	1		4739.33	1971.99	2819.9	1560.43			6177.11				3815.94	5311.74	8155.9	6308.72	75.7268		3692.6	8026.7	961.276			843.302		16601.4		49340.6	25339.6	128168	46611.4	32920.4	34625.1	38150.3	42477.5	13244.8	9802.56	21785	16096.4	34045.8	24634.4	22334.4	19324.6	14536.7	13868.5
O75427	Leucine-rich repeat and calponin homology domain-containing protein 4	LRCH4	4	4	10566.8	2076.2	1374.93	3010.33			4345.73	16410.5	4900.5	7710.13		935.307	2628.23	503.67	1770.04	894.351	1165.65	641.662	5370.59	2494.71		7864.13	3941.99	4032.38	2587.82	783.694		1568.7	1438.34	1899.56		1210.56	1563.65	3454.68		4831.88	984.02	786.271	4854.27	1186.3			1483.6
O75431	Metaxin-2	MTX2	5	5	4892.74	1502.54	4490.75	2024.22	10581.3	19346.7	5245.73	1593.65	7023.11	2951.6		2633.66	2894.67	1934.3	1382.97	1640.44	1898.05	8080.61	5665.58	1875.18	6473.15	4518.3	5813.26	3261.71	4440.84	7235.45	2507.82	2271.87	3364.62	3410.47	1	1597.1	5202.65	2578.27	1.28905		1375.41	1497.43	852.923	1362.92	2751.21	3134.97	1932.23	3782.05	132.503
O75436	Vacuolar protein sorting-associated protein 26A	VPS26A	9	8	12739.7	3032.09	3868.65	4459.71	2639.47	96786.2	7116.68	4104.32	20915.4	7254.69	10685.5	3323	4498.14	4646.38	5190.63	4460.31	3664.97	8335.39	19814.2	3946.9	22338.2	16464.6	3608.79	5876.57	6803.83	20597.9	9443.22	5837.77	9743.45	10815.5	57472.4	2972.83	3852.17	6095.93	33210.7	21782.1	9350.46	6138.77	6669	9459.85	20282.1	19776.1	5193.85	9328.06	1787.3
O75438	NADH dehydrogenase [ubiquinone] 1 beta subcomplex subunit 1	NDUFB1	3	3	6084.31	1336.02	2408.95	3481.07	9047.28	1344.79	975.488	973.196	2651.98	4674.83	13069.8	2696.87	986.885	1121.82	1965.32	1822.19	1407.01	7296.02	1075.57	10.6414	8914.99	2472.35	1095.71	1445.7	7083.22		399.838	981.919	1.21257	1274.97	666.73	470.389	1676.55	1552.42			354.915	147.166	1	492.686	1592.43	1.43526	2029.12	8439.9	28375.2
O75439	Mitochondrial-processing peptidase subunit beta	PMPCB	10	10	3875.99	3858.47	7896.37	6089.79	6768.96	11408.6	3727.88	5228.22	9167.49	3407.32	2173.32	4098.56	3309.06	2878.57	4185.2	3402.73	5526.63	3795.28	14341.1	7183.43	20965.8	6717.28	7871.95	5679.39	4768.67	9816.72	7459.85	6456.65	5250.11	6226.78	1190.45	5576.21	3025.66	6717.09	4136.54	9557.47	4443.96	5004.41	8042.06	4370.25	1262.37	6274.71	4238.98	3122.01	4493.69
O75443	Alpha-tectorin	TECTA	1	1	78947.8	10338.5	13943.9	20013.7	14321.9	25746.5	24098.7	8739.2	31934.9	28927.8	74694.2	16036.6	14453.7	12716.7	14607.1	22979.4	5104.23	45642.6	57165.7	25405.4	21426	44505.7	1395.4	40710.7	7175.75	5463.28	7758.18	5523.53	14926.2	24349.6	46197.9	6242.39	13981.1	10521.8	23807.7	16616.3	5016.22	4352.87	1730.87	12853.9	12495.5	9481.89	9824.9	15741.8	7783.94
O75444	Transcription factor Maf	MAF	1	1	2234.83	424.267	297.57	383.535	1930.42	1321.82	419.606	552.205		2321.46		567.399			370.718	265.563		606.575		197.345	1		594.889		1069.98		381.582	325.072	466.023			1177.38	983.726				341.667	152.851	313.936				822.536	520.378
O75448	Mediator of RNA polymerase II transcription subunit 24	MED24	1	1		117.401	320.825	312.363					560.412			568.663	456.785	361.39	385.681	654.523	1332.44		2949.51	904.153			2256.51	146.357			377.923	821.91						442.22			916.021	547.637	493.211				203.744	210.413
O75475	PC4 and SFRS1-interacting protein	PSIP1	7	7	7209.75	2431.45	2762.46	3460.76	2579.39	3801.54	1402.82	3063.96	4391.6	2953.52	30427.5	3334.23	2527.58	9989.66	4184.42	9236.25	2355.88	2848.46	5052.81	2515.52	9056.9	8550.45	8249.21	2342.67	7245.26	11385.5	6494.9	3396.04	4263.95	3566.71	3747.26	4619.79	2357.67	4551.38	8338.92	15264.5	11485.4	5298.61	5635.37	5887.61	6548.76	6271.07	4846.62	9740.67	18006.2
O75477	Erlin-1	ERLIN1	3	2	11552.5	1		112.038				1607.66	7838.86			2517.86		2390.46		173.73						1.34712			729.206		1	54.6673	1	1506.56			164.669				772.13	549.337	310.773	604.546	208.046		825.835	1
O75489	NADH dehydrogenase [ubiquinone] iron-sulfur protein 3, mitochondrial	NDUFS3	8	8	28032.7	11121.7	10962.7	10015.4	60305.6	12143.5	10728.8	13644.8	16750.5	41657.6	222643	10282.3	9422.41	10094.3	10124.3	11738.6	9168.88	29797.5	16864.5	16466.6	108463	70788.4	16696.1	17365.7	29205.9	27126.7	12718.7	11512.5	12932.6	18582.8	24275.6	9117.47	12998	14097.7	39939.5	40494.5	18397.1	21384.5	22921.4	23651.6	33175.5	50765	22445.5	45361.5	93405.8
O75493	Carbonic anhydrase-related protein 11	CA11	1	1			1213.84		20019.8							2585.05						2267.12			6609.29				2404.23																		1827.19	4492.39	11216.2
O75494	Serine/arginine-rich splicing factor 10	SRSF10	6	3	14284.8	18225.6	21069.9	12943.8	4550.03	11388.5	7222.08	16659.6	15379.4	29239.2	337679	12765	16084.4	36779.7	23658.1	14121.5	22153.7	6687.54	18181	28894.5	46640.4	51939.1	22523	13854.8	17147.9	5986.58	30816.5	17447.8	19818.5	10149.3	21317	28061.8	10483.4	16415.8	29907.7	48268.6	17066.4	17318	32979.8	24472.4	10178.9	16984.9	10785.7	12920.5	11080
O75496	Geminin	GMNN	1	1		606.201	6635.98	2688.32		2004.47	738.445	417.743			21796.9	5810.98	3532.02	10086.6	8937.64	1273.23	8162.26		1482.34	207.995		16927.4	5642.27				1450.01	2463.59	3888.96			2387.99		940.834			438	131.856	965.143				446.754
O75503	Ceroid-lipofuscinosis neuronal protein 5	CLN5	1	1		221.425	430.977	589.038		469.937	1147.1					1289.6	249.337	105.03		701.999	702.454	178.983		611.106				569.812	1			252.883	233.826			1029.37	472.135	218.328			1	178.458					558.571
O75506	Heat shock factor-binding protein 1	HSBP1	3	3	14052	11951.7	3852.39	6748.8	18973.9	30700.1	4332.94	19737.6	12958	13022.8	143574	8735.9	5615.87	4448.87	9025.06	14572.8	7894.47	7906.14	18496.9	9529.57	13390.2	76754.2	3255.37	9303.26	66169.8	41284.2	12383.7	7647.35	7086.45	25442.6	27525.5	7552.84	11796.8	16044.6	6798.19	133150	4935.39	10172.4	4940.54	34765.9	52273.8	9897.38	50594.9	25879.9	106411
O75521	Enoyl-CoA delta isomerase 2	ECI2	3	3	938.976	792.782	1854.77	1189.35	2870.88	866.457	1066.88	1600.3	4342.77			1049.02	1688.19	1459.26	1338.76	636.11	2513.22	6471.67		1213.67			1202.04	1624.45	1.80509	1111.98	2171.88	626.459		119.206		298.447		101.141			1919.72	1056.21	196.726	1055.83	641.315	1.19363	1999.8	1851.3	488.83
O75525	KH domain-containing, RNA-binding, signal transduction-associated protein 3	KHDRBS3	2	2	364.73	2177.5	2898.53		17308.6		127.483	4275.26	400.179	11422.2		2165.33		1393.33		195.626		3437.28		4760.48	7938.71	22283.3	4025.02	1551.53	467.689			79.5543	214.303				2460.97				12539.4	4983.9	4187.36	3852.24	3358.26	5610.21	4989.24	11298.6	12354.7
O75530	Polycomb protein EED	EED	4	4		1790.16	3270.51	3945.18		872.065	691.535	2414.74	1604.33			1541.32	1492.37	4380.56	2432.93	641.467	4296.45	334.435	2991.39	2796.14			2057.58				668.108	1663.56		641.816		1202.14	346.038	1566.63			3880.79	2040.92	5543.83				904.537
O75531	Barrier-to-autointegration factor	BANF1	4	4	639.417	4047.79	3133.31	1221.6	284.829	746.759	1076.86	12813.6	2301.03	31196.8	215155	1320.06	2497.58	4723.63	2670.34	951.51	1697.44	568.273	4250.02	14312.3	22095.5	31390.9	7214.01	2127.54	2432.23	304.497	3264.91	938.489	13814.2	2721.48	5502.3	4531.62	432.133	2927.62	27047.9	44268	1329.07	7171.22	1957.03	8583.44	11656.3	76070.6	589.351	451.717	3584.14
O75533	Splicing factor 3B subunit 1	SF3B1	22	22	4631.17	5604.8	6031.35	4307.08	694.478	4236.89	3119.98	7907.34	18869.3	4934.56	31997	2119.55	3569.31	8854.26	5151.02	2751.76	5531.9	2732.15	7364.16	7880.56	5301.85	2830.51	8527.44	6151.87	388.472	11061.8	6639.62	2802.73	5043.72	4947.12	3176.67	4006.82	1980.29	3753.86	3929.17	8072.79	11746.1	7006.78	14950	2730.18	1770.42	5369.74	2543.02	1028.81	1809.37
O75534	Cold shock domain-containing protein E1	CSDE1	19	19	3582.83	4846.91	3512.96	4299.41	6737.78	6041.72	3925.14	3441.03	4119.2	8772.2	34164.1	4594.59	5756.62	5288.53	8030.26	4312.41	6901.61	7282.26	10047.6	4709.9	13948.7	27859.3	6281.7	2643.02	6440.82	7875.11	4530.35	4442.75	3498.33	5363.36	7221.05	5200.27	4001.25	5949.87	11421.7	9275.14	2596.35	5101.96	5383.26	7704.59	5807.85	10158.6	3596.36	4736.54	11917.4
O75556	Mammaglobin-B	SCGB2A1	2	2		1793.61	171.918	944.735	2299.01			2170.82		20150.7	43135.3		101.419								821.653	69875.8	817.808	107.211	1433.15		2383.3	1				560.332	1730.25	495.23	75453.8	109036	2398.64	8742.79		7147.48	10219	73711.4	1759.3	5859.99	8414.52
O75558	Syntaxin-11	STX11	2	2	3195.48	2919.19	1199.27	238.261		2401.11	2573.99	1616.04	808.771	1		996.711	597.244	128.741	3629.98	900.958	511.853	4677.81	4713.08	6214.77		1.38648	6645.33	5576.67			6864.19	1797.66		8420.42	5194.23	1482.25	88.6504	1580.5			2461.26	3294.11	514.994	7125.64
O75563	Src kinase-associated phosphoprotein 2	SKAP2	2	2	2378.57	2917.67		1112.28		491.88	2557.11	2121.16	2500.54	1226.42		764.171	519.752	762.605	466.239	762.131	327.608	1491.91		4439.65			3355.12	1665.26	2235.3	4462.44	1009.48	2084.96	767.834	2294.76	2165.26	2711.4	2927.64	2141.52	2625.84		2224.37	2979.35	320.492	3979.63	4419.93	2726.61	2508.78	366.38
O75569	Interferon-inducible double-stranded RNA-dependent protein kinase activator A	PRKRA	7	7	3471.69	2567.92	6357.01	3329.01	8382.3	5799.87	2700.83	3411.35	5558.47	7998.42		4021.52	7131.37	6543.76	6153.92	2463.94	10868.5	6640.85	7284.43	4658.55	7422.01	9048.69	6543.64	3428.34	7016.68	880.523	9938	5610.88	3367.29	1347.59		8306.86	6232.6	6951.06	4477.75	4741.71	5710.16	2792.86	6561.88	6694.23	2492.13	8065.89	6942.4	8896.5	12146.5
O75575	DNA-directed RNA polymerase III subunit RPC9	CRCP	2	2	216.096	1	372.488	825.107		1097.76	801.852	227.981	1			408.063	243.887	84.0455	524.944	105.081	355.328	234.427	334.124	79.4187				1			1	444.345	1	31.3145		55.3405	1	27.4254			212.511	269.848	164.14	220.79	1	1.55619	74.4862	82.2394
O75592	E3 ubiquitin-protein ligase MYCBP2	MYCBP2	7	7	4763.03	887.56	2777.41	2336.7	4240.16	3465.79	1488.42	2364.37	852.661	7333.23		1002.04	1302.9	874.513	2245.25	1077.58	954.002	2041.12	2887.41	467.765	16950.5		1625.39	3718.24	874.038	12584.9	669.108	999.706	900.991	588.547	2.33918	557.806	1700.19	2420.21	1.97559		1582.18	1701.82	2477.27	199.402	1388.7	10322.1	1805.71	2122.72	1812.36
O75600	2-amino-3-ketobutyrate coenzyme A ligase, mitochondrial	GCAT	1	1			780.449									1562.41							4078.33							1842.92						2052.97					851.955	84.9197			1104.42		2684.31	2800.73
O75602	Sperm-associated antigen 6	SPAG6	1	1									518.727										1									1	1	1	1	1	1	1											1.00226
O75607	Nucleoplasmin-3	NPM3	3	3	3003.21	2347.06	10118.6	5577.68		11667.4	2655.72	1041.22	1264.88			12140	13525.4	3885.37	13106.9	3327.66	9947.92	2635.52	31642.1	2579.03			1522	1969.32	825.11		10868.6	9292.46	26922.1	9028.36	9494.11	6569.44	5636.56	9100.17	1258.98		4389.33	357.558	7382.09	591.734	139.705		2823.15	1690.02	1743.2
O75608	Acyl-protein thioesterase 1	LYPLA1	6	6	16813.3	5340.66	20205	11265	26647.4	22179.8	11329.4	9996.46	43212.7	19775.4	28334.4	10684	15140.5	11987.9	12134.1	11364.5	11528.3	5941.54	31940.4	9738.4	9516.15	23474.4	45945.4	17559	8616.03	6361.64	12016.9	6386.91	12332.3	20297.2	12692	18379.7	15189.8	14206.6	10419.9	7237.68	1653.85	4612.05	6123.08	5258.57	6387.6	43518.8	8694.31	20376.6	21540.5
O75616	GTPase Era, mitochondrial	ERAL1	5	5	793.321	567.68	1479.87	839.58		560.44	347.789	517.635	1634.09			700.534		1723.26	1168.6		1539.94		1215.7	253.31			1737.78					560.829				590.728		278.902			115.487	97.7	430.274				397.75	211.411
O75629	Protein CREG1	CREG1	2	2	27311	3325.85	3565.9	4360.92	2293.57	7856.35	30293.8	6801.3	1653.21	1709.75	6854.95	8255.65	5803.71	3812.71	8182.56	12581.4	6891.28	30226.9	20372.7	13489.8	11683.2	23223.7	3948.8	33315.9	12543.8	6344.31	9427.04	15219.4	26682.1	50566	186628	31061	30112.1	10085.4	38192.1	103264	2065.43	5305.53	1473.45	10418.3	7905.63	6756.84	3006.64	5536.16	23793.4
O75635	Serpin B7	SERPINB7	8	8	1619.77	1400.96	1360.98	58.9227			281.827	1775.42		2.67002	39582.5		1939.71	293.413		173.025				519.224		27042.4	8779.1		3447.14		2967.43		1398.7	1		1106.19			15641.2	30394.7	914.835	2970.02		1720.19	4744.12	11134.7	1804.15	2877.84	5374.75
O75636	Ficolin-3	FCN3	4	4	3906.61		367.564	1539.52	1840.66		158.113	226.618	439.727			1320.04	226.847	1198.11	329.074	2735.62		1507.31			3677.15	1174.8		843.828	400.96	1818.12		126.814	261.761	620.084	397.175		1	692.372			599.102				2243.03		1222.87	815.097
O75643	U5 small nuclear ribonucleoprotein 200 kDa helicase	SNRNP200	44	44	4023.68	2750.12	2633.35	2381.91	4149.22	3569.64	2050.26	4524.17	5336.77	2283.08	22786.4	1451.07	2662.94	4403.76	2660.28	4917.66	3217.22	2352.97	6494.19	3807.96	3489.51	7569.61	4647.31	3599.96	4768.84	7973.38	3020.34	3921.87	2756.98	1879.64	1226.06	2028.64	1318.17	2795.97	6020.37	10575	7561.83	5330.18	6460.99	2702.02	2907.91	2204.1	2460.08	855.332	969.104
O75663	TIP41-like protein	TIPRL	4	4	4899.31	6425.34	7848.97	10168.6	12489.1	17127.4	7178.76	5056.48	7638.83	12147.2	17243.4	6166.88	7138.25	10650	6986.14	6955.94	9760.78	3247.87	1891.24	5217.33	15238.7	2015.05	8897.41	9010.49	8724.6	7456.28	7926.47	4840.5	5058.35	4209.55	7962.11	6262.73	7018.18	12211.2		6227.8	2404.36	3723.64	12863.7	4931.14	7147.07	4913.67	4422.47	10979.1	12435.3
O75676	Ribosomal protein S6 kinase alpha-4	RPS6KA4	3	2	2233.44	1261.51	2223.45	1618.85	1467.09	1734.57	1895.99	2029.48	3156.3	4626.46		1877.49	2317.75	1213.12	1581.1	2559.09	1416.81	15395.9	1	1244.05	1349.04	6709.45	3495.44	2485.36	1932.03	1853.06	2296.29	1069.35	547.751			1089.31	1470.41	1358.65	2641.14		2570.08	2279.09	1653.77	395.876	2006.94	1068.99	5236.62	1170.13
O75688	Protein phosphatase 1B	PPM1B	8	8	6560.45	2623.19	4190.28	3363.53	9889.67	9645.41	6083.15	1451.58	8834.07	9319.9		5519.71	7379.83	2929	4474.25	3348.38	3162.26	2606.79	11543.1	5497.95	35888.1	24592.7	6477.64	8255.25	6016.82	5672.52	1860.42	2405.2	5510.75	4146.08	4705.96	1651.12	3216.66	3615.87	2924.3	7975.19	1355.91	3006.62	1219.64	4107.65	2680.02	10852.4	3346.41	7268.56	18278.5
O75689	Arf-GAP with dual PH domain-containing protein 1	ADAP1	9	8	18171.1	3175.59	11730.6	13174.3	9584.66	26399.1	11323.5	1676	28067.6	11491.5	62451.5	8852.83	12076.6	8988.92	11259.8	21154.8	9288.34	4101.68	101881	7014.75	24929.5	20572.7	6155.77	25369.1	25737.4	18435	18905	8352.99	41822.8	28424.5	32704.4	16879.9	6584.22	28326.6			4341.93	1969.66	11709.7	5427.23	5302.23	5755.42	4809.55	9672.73	21539.5
O75691	Small subunit processome component 20 homolog	UTP20	8	8	909.427	2405.48	3087.91	2177.97		1830.67	425.6	551.207	1843.74			1225.21	253.737	849.592	2074.95	2335.27	961.661		4616.74	502.455			1244.55			2866.68		600.27	294.573				258.334	983.084		4968.17	2087.53	1384.92	1772.23				1112.26
O75694	Nuclear pore complex protein Nup155	NUP155	7	7	4746.22	850.754	2088.13	1084.84	156.754		196.225	1806.73	1709.89	215.783	8056.14	1070.81	1589.25	2694.54	717.207	2084.5	923.176	302.834	9187.49	527.566		27352.1	1719.12	412.217	16760.9	2312.03	1331.99	3634.05	127.683	282.293		1881.56	225.83	445.039		2447.81	7233.51	3629.43	4828.46	1734.03	1300.57		1293.47	259.127
O75695	Protein XRP2	RP2	2	2	4893.15	3640.44	5740.94	9840.16	1205.97	10245.5	6883.81	3919.83		4048.55		2478.56	7483.17	12450.5	3416.49	6096.95	5096.7	5792.49	11716.1	7203.6		4168.28	8567.37	7480.43	780.654	7278.24	7887.25	3171.29	383.676	3067.08	6591.74	3468.15	5869.33	4130.79			5507.24	3944.14	3892.61	7341.31	2620.55	6126.08	4840.69	5831.19	3470.84
O75717	WD repeat and HMG-box DNA-binding protein 1	WDHD1	4	4	770.62	1212.29	1276.39	978.308		2454.94	432.456	1110.11				658.393	1368.02	2286.8	1628.9	1581.7	1850.47		2321.51	1137.92			1760.9			764.921	2377.7	2694.98	1799.62	1880.44		2019.75	573.779	724.297		620.494	2521.5	646.618	3203.62				818.551
O75718	Cartilage-associated protein	CRTAP	3	3	4342.41	1547.6	3195.57	4465.59			4282.47	4880.58	7271.1			3590.68	6732.86	5123.38	3825.4	7681.74	4004.89	1937.3	3155.58	5833.32		1192.06	4993.3	5284.74		6450.47	2728.63	1552.27	394.942			7500.34		2140.65	2767.27	3862.36	1966.12	3230.02	2899.1	908.177	2627.37		767.024
O75746	Calcium-binding mitochondrial carrier protein Aralar1	SLC25A12	14	14	4592.8	978.165	1457.09	1367.73	8314.81	508.183	708.39	2355.59	3588.23	5327.42	30606.6	1309.89	660.959	1435.19	398.747	1416.16	1032.02	8991.65	945.811	1758.17	33577.3	11737	1100.02	2687.6	9558.07	2733	842.344	2930.98		741.457	559.287	358.924	2799.95	3765.2	1227.69		3974.4	4408.24	4237.55	552.951	2499.67	3058.82	4744.96	6133.32	12828.7
O75781	Paralemmin-1	PALM	13	13	3144.38	2863.82	6072.65	1510.23	52883.5	8992.26	1000.3	3895.16	12187.3	22219.5	161040	5270.46	1306.36	1751.65	1140.39	2270.6	1995.35	65076.4	2458.62	3677.96	94526	33922.4	3301.26	14597.5	16414.9	5604.66	2314.81	2502.97	2114.18	1826.87	3585.49		5974.57	3973.79	13866.9	16305.9	1495.18	2700.95	4178.91	4520.92	10760.1	24687.8	7603.91	32678.8	127228
O75787	Renin receptor	ATP6AP2	1	1				107.062								29.7792				1		53.7233										510.282				130.472	167.549	187.528			77.8932		1.34387					301.182
O75791	GRB2-related adapter protein 2	GRAP2	1	1	3979.2	4672.75	263.688	1093.11		2056.12	2700.53	1572.81	797.614	653.282		3381.13	1351.28		1166.97	1333.45		11360.8	2424.3	5947.48			6520.4	14586.1			1464.12	425.831				500.163	1305.19		227.804			1122.38
O75792	Ribonuclease H2 subunit A	RNASEH2A	4	4	2416.73	2068.5	10962.5	3506.32		11773.5	6349.98	1890.13	8902.08			3118.54	9007.86	3329.46	8263.73	2646.66	10582.2	2967.88	14778.9	6946.68			9145	4348.02	1227.52	6531.33	2203.57	2613.02	3815.07	1853.03		4785.41	544.811	3503.69			1895.29	3516.38	4548.01	922.463			665.739
O75794	Cell division cycle protein 123 homolog	CDC123	3	3	4298.91	2379.76	3999.31	3235.86	154.967	3571.23	3351.57	2035.01	7171.67			4094.84	2675.38	3275.33	5465.7	1517.87	5186.81	1422.91	3742.88	2581.57		1.48307	3092.05			1492.05	385.37	1389.79	2866.54	953.587		1892.65	722.873	1535.23		2529.83	1424.6	281.124	1534.71	1102.01	1.03112	2.60322	993.389
O75817	Ribonuclease P protein subunit p20	POP7	2	2	1944.81	5519.12	3788.1	3957.36		1582.23	1784.77	3486.52	1265.61	4038.73		1632.52	910.668	4144.3	119.032	1314.11	992.187	566.059	6415.89	4659.11		3374.54	3187.38	413.542	4963.15		8219.99	4217.58	12774	4567.01	8552.27	5932.93	1690.86	7725.77		1387.37	3144.22	1877.27	6401.27	3595.3			1310.19	3022.57	5916.56
O75821	Eukaryotic translation initiation factor 3 subunit G	EIF3G	9	9	2005.66	4505.07	4489.03	3957.68	1639.18	5839.53	3830.83	3643.34	8163.97	6329.28	63119.6	3252.61	3453.09	2931.95	6926.35	2425.3	6063.93	7276.3	3291.21	6400.1	6469.18	7495.96	5979.31	3549.92	1250.32	5340.78	4196.9	4495.39	3757.02	3208.24	3768.98	5234.97	3477.49	4016.38	6964.66	4835.66	3536.57	3882.36	5523.06	3248.8		4594.05	2955.18	3057.36	6081.39
O75822	Eukaryotic translation initiation factor 3 subunit J	EIF3J	4	4	2067.62	3485.37	9327.96	5880.6	4339.44	2464.87	3941.65	3957.52	4985.82	324.902		3351.27	7375.73	5964.71	10818.9	3233.83	8661.56	21244	3938.86	4008.76	2623.87		5399.23	1450.22	3622.43	10851.4	2980.44	3385.12	4044.39	1709.03	1628.35	4210.97	2845.92	4266.85	5835.4	2775.46	3015.25	2569.01	4192.41	3003.26	3364.78	5323.01	3261.87	4367.43	2578.86
O75828	Carbonyl reductase [NADPH] 3	CBR3	3	3			941.233		1844.66	4130.17	2977.09			253.6		2102.5	3098.12			3041.39	883.672	4113.19	1815.62					1808.17	449.86		963.628	1		175.405	1543.19	1	103.22	124.826				139.018		858.245	1		704.498	1527.38	1.37537
O75830	Serpin I2	SERPINI2	1	1				711.084	672.841											522.091	128.036			1						4640.36	2817.36	2744.22						2066.39		1265.8	10668.7	2112.32		1508.22		6.19608	798.597	569.26	1437.21
O75832	26S proteasome non-ATPase regulatory subunit 10	PSMD10	5	5	1566.64	1250.2	3401.77	2579.42	2448.76	2916.82	1578.53	357.866	3180.54	1843.24		1708	4080.6	2230.94	2311.21	3141.62	2558.94	2687.98	3117.32	198.743	3.80729		1621.14	1855.38		13033.2	1576.29	902.634	331.472	725.023		1418.36	1836.78	2213.79		1.51512	1096.29	1088.71	1584.79	1277.43	1298.79		991.727	1688.41	3746.08
O75843	AP-1 complex subunit gamma-like 2	AP1G2	3	3	7413.22	1041.33	2942.39	6783.48		3516.54	6389.06	3574.88	7793.95	3645.29		2284.04	3390.99	6189	3637.15	3984.96	2153.59	2661.69	6714.35	1219.9			5218.84	1847.7	686.584		2039.41	967.358		1444.15	662.803	1541.12	1007.26	4530			1817.69	1162.76	1314.76				735.808
O75844	CAAX prenyl protease 1 homolog	ZMPSTE24	3	3					322.634			378.053						216.31	98.963	150.795		25.4581										335.158		151.428		1	209.381	96.7681			926.695	985.693	902.928			693.417	508.88	25.0267
O75874	Isocitrate dehydrogenase [NADP] cytoplasmic	IDH1	12	12	4757.42	5856.98	3455.19	2303.12	5008.59	3012.75	12253.6	6938.34	9608.65	7474.89		4964.41	3381.24	5030.23	4320.5	6091.45	2247.88	2275.82	2915.3	12044	7958.6	7465.65	10932	12770.3	6421.72	13562.2	6213.5	2561.55	5185.93	8756.54	29076.5	3232.8	4352.07	3882.93	50717.3	27404.9	2908.61	6532.34	2225.84	13766.2	6895.24	23230.8	4440.59	5882.03	10897.9
O75879	Glutamyl-tRNA(Gln) amidotransferase subunit B, mitochondrial	GATB	3	3	5819.66	2598.9	3596.33	1284.6	3593.85		3237.3	2049.8	8091.21			1436.29	3589.64	896.083	4340.08	2628.95	4019.39	13854.3	4532.72	3472.08			2885.01		929.704		1905.14	3014.55				1958.36	365.482	205.916			1537.02	2450.98	2566.94	290.516	418.318		1721.5	668.11
O75884	Serine hydrolase RBBP9	RBBP9	1	1	2112.27		808.854	2062.23	1752.05		6089.83	665.967	3348.97			2785.43	4792.52	1861.57	2591.84	548.492	2358.7	7163	1238.05				1398.87	3733.25													267.496						1228.76	3859.75
O75891	Cytosolic 10-formyltetrahydrofolate dehydrogenase	ALDH1L1	17	16	964.609	751.68	1435.16	727.27	20148.6		664.395	208.211	1610.04	5610.83		2889.79	307.321	492.128	314.178	1113.07	231.294	7850.74	469.857		14127	4929.44	1144.91	3550.45	6078.13	4677.61	213.075	1069.48				192.5	2824.72	981.085			671.197	1492.46	357.955	2.04942	984.409	3611.79	3149.8	5124.01	9046.49
O75896	Tumor suppressor candidate 2	TUSC2	2	2	5837.78	5362.9	8196.94	10223.8	41354	10767.9	4765.66	1426.19	9406.52	15327.4		10454.1	2743.68	3349.04	7188.27	5335.66	4507.52	9858.74	16314.6	5038.84	27623.7	5198.94	4855.86	11371.2	22364	979.374	6644.11	3163.53	2600.08	4975.47	6041.72	2772.51	12172	8432.47			2171.33	3039.33	3452.21	1753.59	5369.34	1929.98	9755.83	38910.6	82400.4
O75899	Gamma-aminobutyric acid type B receptor subunit 2	GABBR2	1	1					2215.65													9568.87																										1298.07	2751.41
O75909	Cyclin-K	CCNK	1	1		50.1454		97.6575			54.0121	1				101.44	63.126	813.374	168.29		205.068											665.713		101.582		102.733		1			700.522	136.137	633.755				98.1979
O75914	Serine/threonine-protein kinase PAK 3	PAK3	8	3	1596.02	2238.71	1851.27	1727.63	29479.7	2313.64	3010.86	1660.97	4542.49	4868.16		3530.51	2929.23	1910.75	3512.79	1208.69	1434.65	5096.9	6272.45	1636.12	17005.9		2688.09	4453.18	11404.8	2081.05	3127.97	2285.6	4730.32	2797.85	2945.26	2894.38	6173.13	3237.99	1709.42		848.616	2839.24	2606.58	467.527	7886.66	5795.62	4516.18	13671.4	33272.9
O75915	PRA1 family protein 3	ARL6IP5	3	3	28150	4526.02	4236.76	11166.2	10771.6	10664.4	9875.78	8719.56	18069.6	19327.8	17058.5	9627.79	16444.8	12699.5	18229.1	29076.3	4717.81	22558.3	14257.1	9040.79	12309.5	31958.1	3279.97	7723.9	24350.5	17240.8	13500.1	9809.7	14449	27971.2	49189.4	11025	7300.39	16226.1	39648.9	22523.7	14129.6	14059.9	7577.84	19023	7893.55	13698	9681.48	5838.4	11958.6
O75923	Dysferlin	DYSF	10	10	7064.76	635.684	147.778	275.01	2610.61		1054.55	793.491	1301.65			173.81	148.005	1912.46	403.296	1223.32	202.947	1871.33		3372.84		6026.82	2410.76	1851.19	243.645	1668.22	1	514.685	391.662	4427.47	2744.41	2036.98	452.019	429.264		2785.16	1109.91	555.728	1314.71	3111.26		3031.02	548.592	4219.72
O75925	E3 SUMO-protein ligase PIAS1	PIAS1	2	2		68.9644					21.2439	1				25.3643	1	64.208	21.1407	56.2629	30.6179			96.0979			258.777		161.229			115.58									246.112	359.136	587.389
O75928	E3 SUMO-protein ligase PIAS2	PIAS2	2	1		605.859	543.78	327.863								277.973	464.616				1173.19		1297.24				1				118.924										234.736
O75934	Pre-mRNA-splicing factor SPF27	BCAS2	4	4	4330.07	3950.42	7012.21	5381.2	1950.38	8734.2	4079.84	3768.82	27617.8	633.741	366.4	3592.47	6078.95	7994.29	9661.27	7079.29	6943.78	8179.17	12540.5	5327.78	2.58588	5991.31	11748.8	4656.86	1296.56	3164.41	3854.64	3613.11	2621.59	2267.8	3896.1	2791.97	1673.73	6657.45		4654.6	4946.68	2627.66	1815.4	2946.98	721.084		2423.96	2170.82	5530.77
O75935	Dynactin subunit 3	DCTN3	6	6	2205.42	3113.85	3689.08	3451.38	10267.4	1466.18	3235.27	4495.94	4298.08	13960.8	22.9782	2585.28	2380.47	2522.5	2352.81	3001.12	2938.34	2443.27	1796.06	2622.62	26164.8	10313.1	6319.33	3784.16	7502.6	4177.72	3573.79	3356.58		1745.86	2744.01	2868.82	6029.48	3901.47	7547.23		2369.57	2171.58	4128.48	3591.03	9817.13	9916.65	7906.95	10721.3	24785.9
O75936	Gamma-butyrobetaine dioxygenase	BBOX1	1	1		5000.84	3722.4	190.485	5344.66		356.854			24701.5		2381.78			135.898			2205.53			18394.4	22105.8		2540.03	1387.45									1516.54				554.65			5834.07		3207.83	6267.01	7670.59
O75937	DnaJ homolog subfamily C member 8	DNAJC8	8	8	1697.43	1552.8	2813.76	1917.4	272.422	3581.49	2740.96	3766.91	2858.03	645.103		2506.09	4099.58	7537.57	3122.94	1817.16	4526.43	502.91	2457.64	6514.58	1382.79	613.704	3328.3	4426.57		4266.91	4996.09	2144.78	3622.17	1861.64	1178.69	1689.05	1550.37	1735.83	1120.84	3570.21	4010.84	3828.5	4290.51	2188.55	2516.51	4528.35	1924.92	1264.31
O75940	Survival of motor neuron-related-splicing factor 30	SMNDC1	1	1		3695.63	2554.71	2813.94		3551.19	1917.16	5644.16	5464.35			3104.77	3916.71	5435.6	3149.73	2349.88	3720.01		7256.04	14651.4		4.6482	11938.2	4310.61		1739.46	4794.17	4166.13	21962.1	3990.96	764.801	2988.54	729.822	2451.06		2189.76	9206.33	3057.88	6209.56	1540.86			1886.23
O75947	ATP synthase subunit d, mitochondrial	ATP5PD	5	5	5865.66	4138.6	3602.27	2651.41	16847.6	6861.94	5190.12	8545.7	5978.12	15979.4	107487	3194.85	1811.22	3935.62	2130.28	3210.72	3210.19	334.309	7887.53	6240.05	35487.4	33490.3	5942.29	3930.89	15105.4	41756.8	8122.81	5172.7	11932.6	5794.4	16565.5	5433.54	3800.04	8768.74	37158.4	44673.6	10011.1	10452.3	6782.99	25425	15941.9	58533.5	7681.85	18464.7	54652.7
O75955	Flotillin-1	FLOT1	12	12	10809.6	2901.73	4641.59	3809.36	10958.7	14302.4	4148.81	3933.14	36354.2	22236	129127	3072.79	3305.55	3223.84	1878.88	4814.72	3681.98	6333.64	10538.8	3795.46	48120.8	18764.9	31204.6	7465.28	16424.5	19374.8	4565.33	2469.81	3846.76	4972.94	6081.26	2749.67	2233.16	4492.77	9071.06	21268.9	5278.85	5100.41	3064.81	9924.04	7935.79	13231	4306.08	7537.98	28986.1
O75962	Triple functional domain protein	TRIO	8	7	622.594	3884.51	2899.19	4543.33	6240.49	362.462	7704.88	180.783	7359.69	1192.28		2743.86	496.217	7287.33	113.113	154.934	1057.65	1035.47		204.103	5488.79	2046.34	950.342	880.981	4122.97		16927.7	11536.1	763.836	3933.58	23459.4		2436.6	1355.66			1736.42	3420.77	6221.08				1514.38	1728.96	27103.1
O75964	ATP synthase subunit g, mitochondrial	ATP5MG	4	4	9630.8	8044.09	2930.64	5692.71	12017.2	898.524	4914.49	13458.6	4556.18	27901	667725	4913.95	4225.04	4415.54	1584.66	4614.69	8087.27	4861.81	7058.14	14513.2	113554	63578.8	9265.06	5986.66	24374.6	1442.1	13679.3	8387.19	10638.5	12157.6	12157	9039.84	5460.78	7677.18	2205.29	17485.7	12335.9	12865.6	13431.1	18462.1	13613.5	21798	9593.07	19828.7	42500.2
O75970	Multiple PDZ domain protein	MPDZ	2	2			1		1457.88					908.267		371.005		234.017	1		1	748.674			2.99263			1	2.48852			1					1										699.336	362.624	2.50887
O75976	Carboxypeptidase D	CPD	5	5	4297.03	1053.8	1722.32	1386.76	8955.76	1151.24	1428.91	1311.12	3941.34	1971.26		2754.87	1199.73	1829.44	1460.59	1716.89	268.758	5333.34	1879.05	1018.34	11182.7	1953.59	2330.97	5113.15	3863.48			258.546	1			7173.9	511.938				626.317		635.752				2271.15	2632.12
O75995	SAM and SH3 domain-containing protein 3	SASH3	8	8	1469.39	1610.47	3462.27	5441.29	946.095	4191.3	3027.85	1303.63	2601.26	508.542		2109.5	4251.92	2664.57	5240.52	4182.32	4747.62	1369.38	11248.8	4247.38		2713.63	2042.29	4651.31	2323.52	3599.26	5529.62	3375.33	10298.1	6710.26	2816.74	6972.95	2453.23	6624.59	2130.87	2355.83	2030.45	1937.9	4580.63	2925.88	1048.1	2511.98	1227.12	1764.63	2364.11
O76003	Glutaredoxin-3	GLRX3	9	9	15188.2	13483.7	24059.5	12557.6	8079.46	11987.3	10441.8	8805.11	26871.3	14633.4	62714.5	10210.5	19776	15243.3	14657.6	10886.3	15420.4	5839.36	22738.5	14291.3	10890.4	10151.3	19232.5	10067.3	12587.9	20434.3	12529.2	12621.2	23534.6	11762.8	23460.3	18821.8	10080.3	14427.3	29241.3	32603.3	7281.06	6359.72	12079.2	14102.2	9474.84	28294.4	8412.43	8221.77	21873.2
O76011	Keratin, type I cuticular Ha4	KRT34	3	3	6931.14	10130	2097.99	6573.51	13065.8	5535.76	4337.96	23450	7437.48	9868.9	2188.24	456.513	1188.4	8722.64		59.7974	1323.6	141.692		2017.87	9430.71	67056.2	4540.12	974.29	62951.7	31237.7	26698.8	6694.6	20793.2	31860.2	93663.6	24198.4	10946.9	39085.7	481982	187045	20967.9	10631.8	11385.1	42946.2	82472.1	136826	20428.5	20904.6	46131.4
O76021	Ribosomal L1 domain-containing protein 1	RSL1D1	4	4	968.566	2788.59	3289.16	3484.18			907.508	6745.82	4870.68		22785	1156.44	2422.45	4046.87	2232.23	1430.8	3961.7	2547.91	689.419	5211.59		3998.26	6279.03				3865.66	3784.36	1255.07	1590.83	1533.94	2556.01	603.743			15479.3	13932.7	6754.03	12215	4896.17		1286.97	2763.1
O76024	Wolframin	WFS1	1	1				89.7076												261.636		1699.15																				1					274.382	290.018
O76031	ATP-dependent Clp protease ATP-binding subunit clpX-like, mitochondrial	CLPX	6	6	2258.66	2130.5	4392.07	1352.3	1277.91	3070.54	1593.41	2575.34	3533.51	1958.12		1767.2	1815.14	2934.3	2401.42	1605.58	2966.35	2081.37	14833.8	3466.22	1740.43		4960.02	2108.59			2136.33	1840.4	3306.55			2073.72	2000.93	1667.18		41691.1	1798.27	3194.78	2014.16	834.64			930.377
O76041	Nebulette	NEBL	4	4	3192.18	2087.84	756.06	2830.49	1	333.52	801.209	1114.73	2155.05			709.047	1973.2	2002.43	1654.87	356.618	3028.57	114.339	106.702	1157.65	4.70101	6713.66	4125.03	766.808	1.9664		6622.91	1625.27				373.445					4749.67	246.836	2022.13	706.818	1.54739	2.23852	571.42	490.204	731.204
O76054	SEC14-like protein 2	SEC14L2	8	5	2669.32	1166.84	667.005	476.931	5098.09	680.222	242.528	768.856	2411.58	6860.19		1088.77	539.662	374.052	224.457	2283.53	548.708	2319.94		68.5767	6915.23	1925.13	3521.5	1924.84	2699.14	1728.64	1094.5	166.445					1216.95	155.677			408.918	2078.65	493.989	829.072	4268	880.117	1832.8	3389.91	4332.8
O76061	Stanniocalcin-2	STC2	1	1	4745.86	1932.66	1627.71	2036.04	2695.98	1056.04	5022.99	549.478		546.599	11427.8	1681.25	1676.06	967.351	2019.96	2828.19	796.836	1173.39	6113.09	1699.05	2235.43	797.951	487.191				1871.33	746.924	1590.17			936.8	2012.39				2337.31			253.324		946.06	575.269
O76062	Delta(14)-sterol reductase TM7SF2	TM7SF2	1	1		163.737	220.623	286.102						662.98				1537.67		550.504	154.498	2296.76				7984.34						398.414					752.099				2463.23	436.304	565.891				3987.93	1550.48
O76064	E3 ubiquitin-protein ligase RNF8	RNF8	1	1	3137.28	468.7		1076.36	1800.81	1422.53	750.953	869.233				1012.38	336.865	827.581	332.795	557.028	651.378		279.482	857.207		766.326	781.21	509.735	6572.08		3250	778.451	3275.28			2941.33	2281.03				276.108		1318.14		1942.41	1134.99		361.718
O76070	Gamma-synuclein	SNCG	4	4	3600.3	6698.23	7562.83	2825.15	128027	5192.73	1782.92	1040.41	7621.27	149379	471968	8478.23	697.005		3146.69	5591.82	2956.51	22436.6	958.66	3711.82	116474	181865	4100.28	19779.8	89697	9450.67		8543.08	3331.6	1140.95	26769.5	1200.04	64186.1	17093.3	28961.5		1593.18	5206.18	3287.72	20245.1	94100.5	56116.2	31738.6	101269	417505
O76075	DNA fragmentation factor subunit beta	DFFB	1	1		581.11	606.104	466.895		980.211	1747.33		1153.08			566.89	375.47	588.084	1141.01		647.243		2815.57								727.266	334.277									133.135		232.339
O76081	Regulator of G-protein signaling 20	RGS20	1	1					8845.41							1082.01						1310.4			3353.19			262.435	474.715								612.91										1921.22	7170.47	9960.76
O76094	Signal recognition particle subunit SRP72	SRP72	7	7	3714.71	2378.34	1762.69	1465.73		1013.53	4181.34	2858.56	1641.42			759.515	962.718	2662.73	510.334	893.827	1746.49	614.686		3894.76	1.26349		2503.06	1633.65	411.208	3739.9	1769.38	1488.27		641.283		1199.07	1846.33	787.099	2473.78	4750.85	3930.76	3266.24	1430.91	1344.15	183.945	1.33378	1190.27	170.624
O94759	Transient receptor potential cation channel subfamily M member 2	TRPM2	3	3	7971.36	2875.82	5187.89	2877.96	13101.9		5056.3	765.227	3328.93			3588.17	1919.69		2570.78	4670.83	5217.48	18358.2	16619.2	4167.32			3279.3				1322.11	1376.65	1795.59	5682.09		862.079	1966.59			11127.6	1338.98	1576	1299.14	954.616			2159.68	11535.2	14049.7
O94760	N(G),N(G)-dimethylarginine dimethylaminohydrolase 1	DDAH1	13	12	15246.2	12402.4	15165.8	7599.16	187247	6791.25	9270.81	4781.12	15999.7	123190	325360	30855.9	5095.97	7641.06	9000.87	15231.1	7994.74	28571.9	7352.74	5233.33	113925	41076.9	11909.7	36320.8	129883	29712.2	13140.9	13149.2	7889.55	11490.6	38258.2	5965.35	73806.7	28292.8	76478.5	35886.4	2774.04	12946.2	15531.8	17206.8	77219.7	87897.2	55826.9	181361	408033
O94762	ATP-dependent DNA helicase Q5	RECQL5	2	2		615.802	999.549	1070.62		364.889	573.96	605.21	6054.5			283.831	3090.26	1466.32	1085.77		4338.2			1			2685.2				1032.42	497.483						386.752			4582.15	3452.59	944.005				580.659
O94763	Unconventional prefoldin RPB5 interactor 1	URI1	3	3	494.404	800.715	529.488	701.03	575.056	3541.92	1132.4	302.38	878.991	440.979		1325.68	1093.02	1099.63	1375.94	795.784	714.1	561.76	1647.61	2251.85		1423.25	1220.93	195.95	1326.1		953.806	1540.01	1303.76	1605.11		401.112	1124.14	930.668			1078.74	392.017	1727.18	620.227	811.366		1119.73	1844.2	1075.28
O94766	Galactosylgalactosylxylosylprotein 3-beta-glucuronosyltransferase 3	B3GAT3	2	2	5148.68	2419.7	3912.51	3121.01				188.878	18509.3			1834.78	74.5336	2220.06	4659.48	2386.46		3518.92						7444.5		724.762		1137.53									1169.32		1583.3				1387.19
O94768	Serine/threonine-protein kinase 17B	STK17B	1	1		4952.34	2064.21	1890.63		5550.35	4385.05	1027.92	2486.09			2711.01	4310.66	2982.71	4983.51		1313.65		4657.06	6360.27			5420.58	2540.94				3361.61	1241.71			2768.38	1622.27	3060.46			3513.84	2017.6	4650.19
O94772	Lymphocyte antigen 6H	LY6H	2	2			1		1023.88							19.1606					31.7792	249.974						72.0856	512.742			1					1	1				1	1				134.227	2070.48	1130.6
O94776	Metastasis-associated protein MTA2	MTA2	7	7	3884.23	5817.65	6507.26	5574.52	2049.99	7360.06	5951.15	8432.44	11888.8	14713.6	129600	5843.11	7146.6	10910.1	9732.62	5850.49	10740.2	1852.11	16271.6	8445.28		6192.02	14842.2	4830.05	2394.93	20909.3	6487.1	3867.42	5678.51	7396.09	10457.3	2238.32	1957.64	3293.63	13426.8	12119	8695.8	9181.97	11792.4	4646.21	5484.22	10691.6	2556.49	1167.88	1158.08
O94788	Retinal dehydrogenase 2	ALDH1A2	1	1												784.843
O94804	Serine/threonine-protein kinase 10	STK10	5	5	5985.82	4435.35	2966.91	2726.13		5431.81	5676.73	3299.36	6941.53			3065.33	4165.54	3424.28	5538.71	3202.21	3255.51	7038.31	10810.5	6117.53			4772.31	7090.05	406.356	2667.61	2588.02	2456.09	4243.66	3301.03		1103.79	1065.58	1187.2			2925.31	1444.69	2434.1	1712.86			939.916
O94806	Serine/threonine-protein kinase D3	PRKD3	2	2		2346.66	1566.08	2023.81		435.015	2997.48	1873.42				1858.55	2598.57	1796.06	2012.59	2164.14	3664.56		732.986	2972.72			7233.77				2760.8	5935.92	4321.34			6042.87	1255.66	3464.62			2670.88	3003.31	5976.4				2607.3
O94808	Glutamine--fructose-6-phosphate aminotransferase [isomerizing] 2	GFPT2	5	1	5468.7	2764.59	2406.43	3896.21	9171.47	6651.16	5472.71	8030.41	6446.32	4363.02		2736.94	2933.71	3047.04	2731.34	3008.67	2638.07	5153.91	1025.26	3403.76	6294.4	7345.67	2950.19	2348.57		7353.17	2426.11	2417.13	4233.64	4122.1	2822.6	2223.68	2252.48	2027.53	3658.01	15553.5	1389.62	1751.56	3254.79	497.817	7870.6	280.921	1599.33	1463.71	2312.16
O94811	Tubulin polymerization-promoting protein	TPPP	9	9	8728.31	14650.6	11417	12196.3	120714	7870.04	6057.27	17602.7	39510.4	124846	387423	13132.1	2926.29	1880.9	4915.93	11253.2	8647.85	17902.5		13000.8	198964	60606.5	15330.2	16565.4	50654.4	18703.3	151.426	6235.56	1713.45		15442.5	177.122	22833.4	11035.9	16717.6	6856.34	4557.51	7999.72	9783.74	26500.1	79704.6	82371.3	47490	82633	220808
O94817	Ubiquitin-like protein ATG12	ATG12	1	1	852.721	1458.93	1516.18	743.967	2794.84	944.476	1076.05	1313.35	2823.34	853.334		1758.32	1829.06	1722.7	1533.24	306.123	1126.09		709.097	2913.07			3120.98	2197.61	120.831		170.772	100.693	1			379.358	1072.78	166.179			136.561	1	341.965	1	166.452		528.129	2039.05
O94819	Kelch repeat and BTB domain-containing protein 11	KBTBD11	12	12	7967.9	3572.32	4116.59	3249.86	28342.4	3941.72	3432.75	2595.49	4548.37	32454.4	83209.7	3707.93	3255.71	4099.55	2084.33	4205.24	3829.75	12571.9		386.96	48245.1	24627.3	4174.65	3736.68	9803.64	5683.78	379.144	2314.82			479.318	1529.15	4464.16	3294.06	1900.52		4515.38	3059.46	1833.79	436.985	6710.1	3922.35	9327.93	14756.5	17193.1
O94826	Mitochondrial import receptor subunit TOM70	TOMM70	6	6	1933.04	3287.56	4442.91	3863.96	8325.56	1596.42	1671.2	3031.28	12113.6	2834.1	13509.7	1954.17	2964.95	2915.1	1901.72	1582.24	3383.26	5957.3	993.352	4493.56	30969.7	1354.73	4903.85	5216.44	3709.3	2039.64	3292.4	3837.59	3910.38	9971.33		1242.03	1969.71	2165.99			3912.58	5678.08	4306.97	1790.97	4559.83	489.3	4138.08	8808.74	3921.33
O94829	Importin-13	IPO13	1	1				321.943			243.602						564.934			265.434		32409.2																							777.362
O94830	Phospholipase DDHD2	DDHD2	2	2		1320.57	5518.6	1558.42	9592.85	6431.93	2529.01		6079.57			2128.4	2893.9	5637.89	3820.52	3391.56	3799.05	9447.71	10950.6		4244.53		3271.5	6350.84	4973.43		17051.4	1946.38					2415.14				3135.31	1901.14	2256.17				3188.35	6312.84	5203.16
O94832	Unconventional myosin-Id	MYO1D	21	19	554.581	765.401	924.109	1890.36		366.483	876.923	1149.36	1250.84	5950.71	17152.3	613.612	739.042	1483.38	1143.05	1106.81	1763.98	7592.74	618.899	807.489		7444.63	1051.23	1328.9		640.36	1131.94	377.998	1180.48	685.545		596.949	1414.55	820.32		1069.8	2513.27	1052.39	1602.98	776.134	5834.62	2829.79	5815.77	3918.42	1472.55
O94855	Protein transport protein Sec24D	SEC24D	1	1		315.598		567.026			887.771	110.94	505.187			555.196	572.459	305.123		886.464	1121.94			1162.95				778.675		12535.1		1266.88				750.053		655.101	2697.55		116.813	525.06	376.409	283.036			163.22
O94856	Neurofascin	NFASC	22	22	6700.93	4892.78	10693.8	6040.77	62902.4	1040.06	2221	3994.95	12143.4	52201.8	350356	9381.47	1310.73	1430.25	5148.04	3986.48	2936.96	51664.4		1589.86	136867	49484.7	3262.32	14609.5	37331.1	13628.2	1388.04	5807.82	8777.16		2198.5	92.3516	9264.07	6941.92	5180.78		2055.64	4498.73	6505.76	1914.33	29919	42922.3	23081.6	38000.6	75386.8
O94864	STAGA complex 65 subunit gamma	SUPT7L	1	1	3725.93	2667.65	3309.19	5685.9	1460.24	9126.31	2490.61	4303.39	10522.9			3228.57	4370.88	5438.66	4636.87	5055.52	5141.94	2230.33	23079.2	4946.63			8955.91	4290.65		538.285	3686.93	2870.69	1210.06	1780.62			1696.57	4017.49		656.987	3667.35	2812.18	5436.06	745.105			989.8	475.857
O94874	E3 UFM1-protein ligase 1	UFL1	17	17	2411.53	2825.93	2242.33	2018.36	1790.82	2917.06	2675.73	2909.02	4950.97	3819.14	4030.79	1086.83	2212.67	3428.99	2179.1	2687.03	2437.55	6205.73	2862.76	3529.84	5741.73	5592.45	4428.82	2739.55	2961.94	1976.57	1957.01	2179.58	1792.97	2877.99	2204.24	1441.73	1150.24	1215.86	894.317	1860.01	2239.69	2473.05	3066.11	2612.07	1927.46	2823.87	2120.81	1040.12	585.585
O94875	Sorbin and SH3 domain-containing protein 2	SORBS2	5	5	4344.13	151.723	1310.4	2317.25	6990.88	3610.14	3994.57	1988.27	667.134	1683.93		878.908	90.4503	308.595			192.313	1389.81		443.826	4028.66		733.821	1275.27	2331.9			652.985			5966.92		1162.73	219.978			76.8573	3841.62	675.128		3730	935.048	471.9	2320.25	2979.49
O94886	CSC1-like protein 1	TMEM63A	2	2	1053.2	614.351		1182.57			467.894						128.033	242.107	261.017	1957.52						1482.8		815.037				463.567	509.833	3143.91			1220.98	691.577			223.474	1165.87	699.659	912.344	4698.67	3163.51	2737.44	1471.94
O94888	UBX domain-containing protein 7	UBXN7	6	6	8195.63	4673.71	6644.37	4928.57	9734.99	18730.7	6810.3	4339.99	25600.5	3516.19	12171.2	5252.29	12343.3	9734.71	9340.38	7441.88	11718.8	6064.27	31575.8	9144.65	14290.6	1876.28	21316.4	10885.4	12275.1	12607.2	8230.29	4948.75	5194.45	7073.75	14923.1	5242.23	3427.76	9056.86	5911.25	14733.9	6016.34	5792.05	5687.75	3215.22	3575.93	11498.7	2614.44	1522.77	1958.71
O94901	SUN domain-containing protein 1	SUN1	1	1	5379.92	2236.87	4573.25	4359.38	3986.95			1250.59		1851.78		3326.48	3628.92	3904.47	4211.43	3317.46	1195.95	4389.59	8229.7	1261.56			1968.6	680.605			4919	2917.12	1558.16	4310.16		2883.51	5531.51				3843.99		2549.96				3256.76	4475.88	6228.03
O94903	Pyridoxal phosphate homeostasis protein	PLPBP	5	5	4599.59	2923.96	5962.19	6537.81	13321	20318.7	7901.7	2976.55	13166	12937.9	48070.1	7386.84	4761.61	4539.46	5103.16	4980.94	6189.32	4127.19	21406.9	5472.19	17915.3	11373.6	11684.7	10864	8513.91	5180.25	8748.57	4474.29	2556.85	2982.78	8994.47	5524.84	5827.89	6867.54	6176.92	8601.08	3186.44	2865.23	2394.27	4000.34	5650.8	12615.6	5333.57	11216	10107.4
O94905	Erlin-2	ERLIN2	2	2				51.6135				843.025																		933.441		625.635									1084.54	556.559	800.4	1092.22			2000.14	959.12
O94906	Pre-mRNA-processing factor 6	PRPF6	8	8	2141.16	3063.83	4006.37	3220.18		2017.77	1378.59	4211.89	10797	4963.33	33012	1148.35	2327.45	3355.2	3893.6	2380.21	3775.57	436.409	4428.81	3566.95	7437.2	10014	7743.25	1959.42		3520.11	2558.4	3814.53	555.808	1393.3	2972.66	1750.33	385.697	2261.52	3401.96	2728.05	7134.2	5595.1	5814.54	3407.88	2204.82	1445.93	2061.08	845.287
O94910	Adhesion G protein-coupled receptor L1	ADGRL1	6	6			263.804		13434.2							1492.62						7520.82			17196.2			1058.61	3697.1			481.808					857.509	864.035									1115.11	5071.67	4936.72
O94911	ABC-type organic anion transporter ABCA8	ABCA8	2	2																							1		1														1				596.548
O94913	Pre-mRNA cleavage complex 2 protein Pcf11	PCF11	3	3	349.046	1572.86	1807.38	1256.09		2693.21	710.958	1362.53	4210.3	1.0879	2843.22	1389.77	1085.34	2501.56	2042.19	1039.87	1312.28	501.863	3160.79	3770.77	2.25382		2906.26	2982.03			2176.93						1372.26	2122.51			947.427	770.217	2588.7		12244	851.233	60.967
O94915	Protein furry homolog-like	FRYL	7	7	2784.93	2037.99	2017.49	1590.52	1537.32	3349.46	2074.7	1175.13	9084.03	590.213		1186.13	1254.86	2164.82	2669.61	2053.46	2404.2	1573.96	5387.11	686.152		1449.26	3075.1	2140.28	665.932	1586.33	1295.21	2619.18	5816.21	3744.24	692.839	1788.41	2557.17	2961.45		2700.55	1756.13	958.174	2279.42	1733.72	1052.19	737.728	1500.77	441.471
O94919	Endonuclease domain-containing 1 protein	ENDOD1	10	10	6255.86	11508.1	9365.71	12061.8	8034.18	2520.76	2583.26	4608.47	6922.13	32624.3	247955	5033.23	10239.1	13331.7	1406.32	9920.06	1624.95	6340.86	3969.12	3283.36	24664	34015.5	13796.5	6292.78	17768.2	8465.96	3968.18	9754.65	4663.1	4976.08	18872.4	12025.3	7634.67	1475.84	8861.76	10729.7	12392.4	5497.56	2602.24	9342.74	20062.9	17489.9	10466.9	13723.1	11510
O94925	Glutaminase kidney isoform, mitochondrial	GLS	15	15	5354.8	1273.21	6574.02	2891.17	15815.9	3332.49	1463.51	1885.5	23280	3205.74	12576.2	1994.3	1954.57	1588.88	2996.3	3346.89	6430.59	11656.1	2065.58	2647.68	18114.1	5804.96	5643.39	1313.86	9238.23	4399.09	1548.99	2840.64	2509.64	5131.35	272.699	2562.5	1550.35	3368.87	1140.35	3102.89	876.512	5195.95	3642.03	2458.15	2798.45	11551.3	3861.19	5803.25	9414.42
O94927	HAUS augmin-like complex subunit 5	HAUS5	1	1	6701.93	5625.79	1764.91	5753.2	3720.81									5465.85	8301.65		3541.06															4176.32					7718.37						3638.37
O94952	F-box only protein 21	FBXO21	1	1		169.336	103.505	206.372	1339.59			132.426				453.622	160.041		454.135	133.134	67.1173	907.744										204.036				175.56	342.74				1						422.177	304.15
O94953	Lysine-specific demethylase 4B	KDM4B	2	2		198.675	478.777	685.282									605.656	1	99.8908	213.407			338.176	158.311																	1046.35						1
O94966	Ubiquitin carboxyl-terminal hydrolase 19	USP19	4	4	1539.29	910.657	1275.74	1471.4	1053.77	1888.72	790.353	800.162	1457.17	547.542		697.51	1106.11	1086.12	1138.5	578.032	1232.49	833.236		874.023			1500.92	1615.03		580.235	44.3377	521.311	1	1119.51		1050.79	1930.72	471.305			909.427	822.872	1349.47				456.433
O94967	WD repeat-containing protein 47	WDR47	6	6	142.889	58.0081	534.883	85.7377	6007.7					150.741	4606.34	566.442			140.698		120.885	2257.5			4587.37		191.535	670.741	1425.41			89.4942					34.1004					58.3238		337.792			585.506	1371.44	2941.12
O94973	AP-2 complex subunit alpha-2	AP2A2	18	18	1279.3	711.328	1292.49	863.956	10183.3	10335.9	2704.52	1045.44	2589.58	1367.58	9955.78	2039.56	836.991	873.226	1798.13	5634.37	980.103	7123.34	3406.24	2542.45	7533.28	353.896	2348.23	2295.35	5937.52	6407.71	1216.25	1702.92	1447.67	2083.73	1351.22	841.405	1719.93	3293.87	1452.32	1787.89	2073.24	2494.06	1182.45	3799.1	2777.09	6803.03	2800.95	4535.75	5188.07
O94979	Protein transport protein Sec31A	SEC31A	15	15	6882.59	5329.66	5747.13	3926.93	4888.51	5539.46	5503.18	5969.55	7000.57	4504.17	15036	4220.46	4643.73	7806.22	4891.94	7127.44	5127.03	2230.77	3989.22	6318.9	14620.6	5765.11	5308.27	5031.54	2531.67	8932.67	4175.11	3564.51	5474.36	4270.8	13685.4	4609.95	2756.6	3754.67	6783.12	5277.53	6560.32	4426.85	4859.98	6023.3	5197.97	17494.3	3657.61	3107.29	3224.03
O94985	Calsyntenin-1	CLSTN1	5	5	362.643	2355.12	2157.58	1180.61	9464.63				2680.33	4264.36		4387.06	565.22	1929.82	5985.73	370.836	1901.77	1070.82			3818.42		356.744	690.737	293.747		1034.45	259.396					644.465				138.873				6773.44		1627	1961.55
O94992	Protein HEXIM1	HEXIM1	3	3	3363.61	2847.69	3075.88	2214.4		8647.13	3195.56	3670.63				1482.31			1713.48	2379.99	2292.92	2389.99	7758.62	1028.49			3285.45	2929.81				728.969	3838.91	5226.24		1297.63	2126.31	2902.55			5832.51	3832.37	1180.83	1575.14			1722.99	796.986
O95050	Indolethylamine N-methyltransferase	INMT	1	1														474.694												616.262
O95057	GTP-binding protein Di-Ras1	DIRAS1	3	3		591.492	338.507		4993.35			225.188		6488.23		843.257			741.828	188.888	199.469	1859.58			16704.3	5639.43		384.591	7449.23			70.9036				125.94	2513.91	1873.65			1876.91	2217.35	5960.2		2561.15	1836.18	3325.32	4931.38	5914.65
O95067	G2/mitotic-specific cyclin-B2	CCNB2	1	1		1311.58	2058.27	2771.01			473.364	621.68				216.287	4691.12	6186.32	6644.85	1832.65	1454.38		1193.23									682.384				1940.45		1179.18			751.638	442.39	216.811
O95071	E3 ubiquitin-protein ligase UBR5	UBR5	22	22	3559.78	1200.18	3316.94	2515.1		4991.86	3359.07	1586.71	6980.98	1213.72		1931.03	3974.73	3033.75	3669.29	1821.62	2944.02	1422.19	6487.58	2492.78	745.884		3795.89	2984.09		922.432	2295.14	1918.58	1011.17	542.677		1345.84	830.646	1578.59	1.72575	341.478	1584.37	1343.1	2036.91	1.39284	1	2.31196	777.74	1	107.254
O95081	Arf-GAP domain and FG repeat-containing protein 2	AGFG2	1	1		174.828			797.37																																978.434
O95104	SR-related and CTD-associated factor 4	SCAF4	4	2	1278.64	9572.34	10333.3	9857.39	1288.8	12268.4	8069.62	11261.6	14383.1	1026.26	64354.6	5245.7	6382.79	12127.5	4368.79	6419.44	7070.95	2641	12811.8	10036.9		9575.77	12542.6	8504.2	2877.03	3195.79	7624.85	10106	3494.17	2704.99		6716.65	4740.48	7281.04	4572.42	8365.57	5987.26	8449.82	11510.8	5713.13		4063.81	6790.44	2409.42
O95140	Mitofusin-2	MFN2	2	1	1384.05	525.611	2490.69	527.096	4515.82	573.954	550.302	1063.02	2096.45	1847.07		844.204	528.279	1706.91	1036.65	1267.35	2123.6	1183.69		2361.35	3522.64		3114.86	2417.79	1769.14		256.389	748.276				473.842		610.654			983.894	902.82	578.831	1364.99	846.18	2373.95	2274.62	1126.35
O95155	Ubiquitin conjugation factor E4 B	UBE4B	2	2		402.438	426.512	915.417	130.979	779.476	751.639	1010.18				1312.48	1379.2	399.757	1137.93	743.911	765.983	447.492	1191.47	879.551			1333.09	486.062				320.773		440.986		579.556	107.21	173.048			292.452	601.134	139.646				557.843
O95159	Zinc finger protein-like 1	ZFPL1	1	1	7240.58	693.43	2796.41	1919.49		372.314	1	890.358		1128.68		45.632	731.109	1968.36	843.702	199.452	1847.86	134.31	3584.78	454.985			309.77					343.669		193.416		123.482		1			2552.52						278.53
O95163	Elongator complex protein 1	ELP1	4	4	4589.29	1530.25	1730.78	3034.17	644.803	2744	1991.78	1220.53	8704.56	713.881	35181.5	1862.82	914.111	2023.97	3178.98	1556.43	3023.8	2275.24	3979.97	919.845			5716.24	1048.72			2426.04	1943.39	3851.74	2168.28	3725.03	1503.7	953.191	2534.89		5508.97	2645.54	2504.5	2376.44	545.61	2855.55	1673.49	1314.81	689.202
O95164	Ubiquitin-like protein 3	UBL3	1	1		251.095	256.844	316.486		88.7944				105.261		192.062			111.095	1.28503	1	556.988							1					1	1		723.334				79.5375	1			963.85		1552.06	2025.56	686.225
O95166	Gamma-aminobutyric acid receptor-associated protein	GABARAP	1	0		855.919	101.89		3382.48		387.01	244.928		2639.75		500.178	259.645	1				197.219		119.43	2094.42	781.976	536.765	361.896	1760.96			136.97	152.277	1503.5	108.351	1220.01	1189.27				167.841	469.452	125.022	1042.52	1973.32	142.378	1434.44	5666.96	1997.97
O95167	NADH dehydrogenase [ubiquinone] 1 alpha subcomplex subunit 3	NDUFA3	2	2	3327.53	4169.52	2805.48	3328.95	11629.5		424.948	5232.99	8509.62	11456.4	586070	1732.3	1283.61	2303.56	538.195	1124.18	5022.43	3136.95	263.711	13766.6	132098	14375	10055.4	4016.66	4660.43	1864.63	1281.97	1707.99	2404.14	1224.45	37.9475	2078.16	2802.01	771.164			3919.69	1666.5	2992.61	6331.31	3632.53	10829.6	6472.09	12466.5	13246
O95168	NADH dehydrogenase [ubiquinone] 1 beta subcomplex subunit 4	NDUFB4	3	3	32732.8	16400	16597.4	10007.5	64590.9	5973.32	8543.54	16570.9	26709.4	58973.8	513356	12897.5	9779.19	9992.32	10913.5	12610.5	11590.1	26273.7	11004.1	20259.1	130565	66303.7	14968.4	22938.6	24773.8	9943.63	9397.41	13940.4	10223.5	14394.2	23806.5	10837.9	15216.2	15179.4	17806.5	26282.5	21650.3	17152	21488.7	14880.5	27029.5	54363.6	29230.2	66696.6	167825
O95169	NADH dehydrogenase [ubiquinone] 1 beta subcomplex subunit 8, mitochondrial	NDUFB8	3	3	12432.6	5083.6	3872.22	3184.96	28513.1	2036.73	1598.97	4947.51	7440.11	24358.9	329574	5113	2678.8	3164.76	4167.13	4823.93	2630.55	29431.6	1273.08	5981.66	44648.8	21738.1	4042.76	5609.16	9200.22	8749.3	4172.15	7218.54	5881.37	6594.84	10994.3	2471.31	6780.71	5704.21	9949.82	6604.18	6818.7	8433.82	9103.12	11366.1	12875.5	22913.3	13791.1	20518.1	74173.2
O95178	NADH dehydrogenase [ubiquinone] 1 beta subcomplex subunit 2, mitochondrial	NDUFB2	1	1	188240	37954.4	1459.56	1423.91	220497	50029.7	23519.8	33929.1		178079	2.9428e+06	44739.8	1478.27	15080.1	4399.88			4875.32	86499.1	49753	539309	165029		146609	122199	6479.9	27685.2	26307.2	48658.5	84581.5	142683	27336.6	58410.5	60197.8	19291.2	47217.4	17048.7	16151.9	38208.9	45509.1	43019.8	71220	48914.4	162983	749343
O95182	NADH dehydrogenase [ubiquinone] 1 alpha subcomplex subunit 7	NDUFA7	2	2	7433.59	7933.98	9568.35	1905.75	47499		1116.58	3324.87	15627.7	17118.8	15832.1	8094.63	3810.41	4412.17	5466.37	2381.75	5406.27	8946.32		6829	23444.7	12390.9	6341.84	7776.74	6509.65			703.986	943.312			1204.89	5154.8	1257.32		3325.46	1883.14	742.329			2222.87		5936.9	48845.8	40221
O95183	Vesicle-associated membrane protein 5	VAMP5	2	2	7658.02	4639.14	887.579	1481.42		1653.12	7507.81	1750.65	749.483	19058.4		7572.77	2917.99		3391.68	6199.59	1085.58	29540.8	19700	8822.71			8401.65	1618.59	18297.7			4903.37	9596.9	40851.5	47862.2	4550.25	21191.5	12969.9	5507.88		1528.61	4025.82	2662.43	14118.9	3907.96		7591.93	7884.45	25198.5
O95196	Chondroitin sulfate proteoglycan 5	CSPG5	1	1					9939.72			282.538				2125.25						11167.8							2097								1684.39										1208.87	6717.13	26604.4
O95197	Reticulon-3	RTN3	9	9	10427.3	3514.4	2972.2	1916	5898.88	55.119	4080.43	4061.83	5762.38	9389.24		1808	1805.37	3538.37	2828.91	9065.3	261.771	1178.31	6238.48	1888.22	12099.8	38964.9	282.041	9681.14	4431.9	18251.2	4361.56	3215.78	1559.62	1.13818			4557.36	4054.64	7643.28	5366.4	2034.26	4406.34	1360.12	9251.1	6070.54	15218.9	8657.78	8089.78	8586.81
O95202	Mitochondrial proton/calcium exchanger protein	LETM1	10	10	1726.14	915.894	846.413	1927.29	3606.75	1514.55	327.636	685.849	3431.35	313.753	21478.1	559.709	122.747	994.363	1663.76	696.318	1621.18	3161.74	529.292	1778.39	4257.95		2169.51	807.665	635.573	362.34	454.268	1164.93	104.537	1253.39		1840.63	655.501	2361.2			2034.26	2041.76	2491.86	409.758	857.518	1.00075	2184.5	1474.72	3376.35
O95208	Epsin-2	EPN2	5	4	1163.23	1386.11	395.696	1482.64	9162.55	217.379	511.913	655.003	2234.57	11171		1735.09	484.038	288.718	453.135	1067.36	1050.47	3006.33		1013.39	4629.45	3126.04	1065.25	2187.46	4868.63	2417.39		318.051			944.064	578.928	1013.63	438.63			451.299	413.841	386.565	1132.09	6487.47	4641.76	4225.82	5471.76	4179.56
O95210	Starch-binding domain-containing protein 1	STBD1	1	1	107.328	1		135.06	194.783							159.316	68.0179	211.397	456.82	119.107	165.838	13638.4	98.4293				303.928	347.075				126.543					161.719					249.753			188.376		113.765
O95218	Zinc finger Ran-binding domain-containing protein 2	ZRANB2	4	4	414.688	7572.36	3751.09	2899.47			695.108	2590.33	13104.3	1938.51	124113	2846.86	2382.1	1780.97	2717.37	2081.02	3417.66		2840.52	5726.47			15244	3722.59				855.415	1	1		1013.53	1				151.23	3864.93	454.087
O95219	Sorting nexin-4	SNX4	10	10	2287.15	584.344	1396.64	1576.27	5124.45	839.335	1494.92	607.58	2851.62	3778.49	1023.34	1048.89	1051.02	718.799	1083	1380.23	809.05	14006.4	1697.97	796.881	5880.56	7040.49	1018.61	1934.71	3232.32	1390.37		359.939		156.443		325.347	974.436	473.53		507.442	302.315	518.714	706.644	178.028	1728.28	1330.31	1726.64	3933.54	3724.92
O95229	ZW10 interactor	ZWINT	1	1		1423.42	1799.81	2050.27				277.987				1128.49	2244.23	617.635	4065.15		1483.18		402.932				999.612					1239.08									168.518		1198.09				179.104
O95232	Luc7-like protein 3	LUC7L3	4	4	7886.64	7881.9	9611.36	7125.81	1524.64	8243.25	4793.47	11750.5	16705.6	3627.22	22835.6	4513.14	7203.4	8775.75	7597.53	3669.76	4193.18	3660.05	6980.35	5009.69		6524.96	9394.93	5038.95	1	846.19	5133.43	5221.44	2474.35	1348.18	1.03255	2531.59	1067.64	1639.64	2.43532	1071.71	6197.16	5217.1	10949.6	1559.5		1.47353	3182.3	1847.62
O95236	Apolipoprotein L3	APOL3	2	2	19752.4	6483.45	6238.27	3826.91		13357	5422.83	2367.47	7044.13	6268.72		3501.88	5016.12	1497.74	5734.38	10901.6	2042.33	18967	33103.5	31350.7	6801.4		34791.7	9432.13	3636.77			4147.03	11001	40084.5	56277.6	4281.55	3531.45	9790.57	2881.57		4054.95	3416.56	703.667	45944.8	2752.82	6393.66	4031.14		2295.63
O95239	Chromosome-associated kinesin KIF4A	KIF4A	3	2			1230.64	554.463									1238.9	1618.59	1373.52	609.594		434.199	1483.37	1306.85			1855.49					1697.24					427.363	773.842			757.581		1405.02				288.055
O95248	Myotubularin-related protein 5	SBF1	10	9	776.992	765.658	592.92	1235.47	1778.3		516.654	608.866		1954.07	5.44621	936.291	354.991	878.693	244.807	675.362	243.39	2141.41	757.532	940.81	2199.91	4611.88	341.805	356.698	5201.81	2071.73	2183.08	1132.4	856.406	606.452		656.569	1129.18	1578.14			391.545	378.936	682.71	813.319	2025.55	1044.86	3018.3	2686.87	7624.22
O95251	Histone acetyltransferase KAT7	KAT7	3	3		672.178	2135.86	2153.03		6694.26	85.5361	761.392	4524.27			2015.31	1565.96	1807.86	3020.41	2255.61	1406.51	4110.01	7652.3	1303.85			3421.36	2018.08			596.758	271.14	379.325	1		752.621	634.403	1583.9			1409.81	300.68	1416.54				150.501
O95260	Arginyl-tRNA--protein transferase 1	ATE1	1	1								1												468.487				410.737						242.57		658.845					67.1426		198.078					203.456
O95273	Cyclin-D1-binding protein 1	CCNDBP1	1	1				1									90.2103		104.363	66.8028								68.3908					172.383	155.488		866	100.581	1			227.772
O95278	Laforin	EPM2A	1	1			2281.38		11181.4				364.79	6358.28		2132.85	1148.16	220.698	1041.68	1648.46		6734.45			5902.02	985.38						389.928					4553.18					297.371	2019.47				2948.41	7335.88	6608.9
O95292	Vesicle-associated membrane protein-associated protein B/C	VAPB	3	3	4844.14	3317.46	5361.05	5563.67	19982.4	16679.6	10530.6	2425.53	4632.13	10825.7	79535.5	4306.44	3653.41	5385.46	8094.72	9494	4008.3	31377.6	21634.8	5949.62	17285.5	40395.7	3722.34	3675.17	19902.3	11252.4	7228.7	5654.8	6686.91	6484.1	31980	4837.43	8623.52	5189.09	61423.1	23780.2	5606.73	4978.71	8234.14	19595.5	5238.56	72748.1	8733.5	21532.3	38909.9
O95294	RasGAP-activating-like protein 1	RASAL1	7	7	801.719	2191.79	8309.85	2020.67	21994	5933.2	1363.13	987.894	11632.3	3836.62		3127.06	7763.95	3084.56	5783	3349.16	7887.21	7052.32	3279.22	3149.5	20304.1	7890.09	7626.3	10680.2	14365.9		7220.32	3816.42	1670.68	5871.29	72.8119	4891.27	1859.63	9564.29	7083.09	3134.64	289.234	3397.59	7385.51	1741.59	2659.23	3861.14	4830.68	8763.03	17175.1
O95295	SNARE-associated protein Snapin	SNAPIN	7	7	6354.61	3524.81	3742.66	3997.39	3804.11	5839.16	7494.76	2519.91	8364.79	6563.76	3515.9	4221.82	5603.53	2296.37	4092.69	4654.49	3084.92	9805.11	15097.1	4244.56	4495.14	3662.2	4751.41	7284.13	4448.56	1663.03	5224.93	3369.25	5290.84	8363.35	10193.9	5642.66	4122.3	6596.61	5337.62	2575.53	4616.18	2677.06	5490.51	5544.21	2030.55	7210.2	4520.59	8495.21	19930.1
O95297	Myelin protein zero-like protein 1	MPZL1	2	2	520.051	282.162	520.954	1044.53			1336.76		290.475			468.719	502.915	1266.72	341.621	618.491	712.138	436.911	1318.89	1105	1868.12	588.089	618.878				3295.02	831.09	4813.65	1780.47		4935.33	1751.73	1385.09	1.83076		672.766	157.328	2159.62	1218.21			435.964	1637.38	3611.58
O95298	NADH dehydrogenase [ubiquinone] 1 subunit C2	NDUFC2	2	1	4965.47	3155.78	2517.18	2243.91	12034.4		1802.48	3323.55	7372.99	9119.78	179180	1775.79	1835.59	2130.75	1631.44	1558.85	2828.16	11723.6		4488.01	50157.3	12653.3	3300.12	4486.95	5360.9		2523.15	1269.49		3192.02		1484.17	2156.56	2218.86		4479.14	3754.32	2093.08	3785.25	4872.66	16464.7	7551.34	5718.96	11124.1	14899.7
O95299	NADH dehydrogenase [ubiquinone] 1 alpha subcomplex subunit 10, mitochondrial	NDUFA10	4	4		1809.95	2816.43	671.151	7522.33	261.332	1216.32	2649.69	7196.42			2107.94	2787.62	1240.9	1222.53	3106.72	1916.86	19223.9		4257.68	16881.4	8215.83	6426.52	404.874	4968.08	2389.09	2183.26	2294.38	312.17	7697.73		586.29	3302.63	1654.42			2271.65	4507.66	4036.32	3319.07	1069.33	12207.3	3714.24	8185.33	10075.9
O95302	Peptidyl-prolyl cis-trans isomerase FKBP9	FKBP9	7	6	3139.36	1070.71	2062.18	3623.98	3282.43	2305.96	4601.18	2429.26	10951.1	4744.16		2736.97	4494.85	3187.97	2069.44	4843.5	1817.64	2308.9	3460.16	5451.22	7567.22	4570.88	1370.11	4448.35	8565.74	62705.9	11352.1	2390.93	4659.14	4575.15	9888.24	4040.51	2833.72	1780.11	66424.1	42795	926.155	6793.44	2092.63	14613.6	7671.43	31434.1	2000.92	2141.5	7741.51
O95319	CUGBP Elav-like family member 2	CELF2	6	5	4025.71	1854.53	958.749	889.405	4567.81	1830.25	4368.64	1800.59	3380.33	4693.35		1959.68	1344.53	860.878	790.648	1212.04	652.206	2897.29	5095.16	3283.93	6035.67	3260.1	3400.31	3334.07	961.006	3119.17	328.125	810.545	2442.51	3337.06	10001	617.47	1047.83	957.662		9229.69	695.941	1114.59		3962.46	2480.27	8241.02	735.813	2217.89	5021.87
O95336	6-phosphogluconolactonase	PGLS	9	9	23926	7073.21	12577.4	12096.8	17285.2	28900.3	29734	6592.19	23856.2	41610.7	46508	19313.3	25513.1	8812.3	18027.9	24487.7	16272.8	32459.9	45362.8	11337.5	33603.2	15661	11168.3	18671.4	21435.7	14084.3	8330.99	6411.06	21139	25743.3	40431.3	14472.3	18919.1	24322.6	13681.2	3435.01	2173.06	3371.55	4106.55	8256.58	14152.7	9817.46	7595.27	15921.4	34530.2
O95340	Bifunctional 3'-phosphoadenosine 5'-phosphosulfate synthase 2	PAPSS2	2	2	946.333	618.183	552.951	1321.26			1751.98	687.631	616.172			631.513	677.35	1802.36	576.848	1795.4	236.324	978.746	344.228	1697.46			748.091	1417.33				407.107		424.357		464.067							207.266				61.8556
O95347	Structural maintenance of chromosomes protein 2	SMC2	7	7	2017.75	2111.52	1112.58	2619.55		1310.1	855.331	2414.58				1181.46	1631.44	5768.87	3041.25	1679.05	3347.76		7953.55	30397.8		2.49549	1981.77			1741.69	3032.05	3485.84	2261.3	4366.75		5525.38	3860.1	1666.23	2.80005	25556.2	7672.76	6832.35	9499.34				3025.68	185.21	1035.85
O95352	Ubiquitin-like modifier-activating enzyme ATG7	ATG7	7	7	6350.87	851.196	2220.22	1355.05	3687.5	1656.02	1843.42	1413.67	3927.89	2226.97		2124.26	1467.55	1028.93	1005.34	3275.38	1475.86	3679.88	6832.48	1770.74	5709.59		2536.23	8007.06	3127.1	2541.28	2195.51	1289.89	1924.73	6361.13	8921.46	970.297	1954.54	890.686		2.10102	638.523	353.565	1228.23	1474.11	2869.14	2030.67	1305.8	2017.93	5656.57
O95365	Zinc finger and BTB domain-containing protein 7A	ZBTB7A	3	3	2879.23	673.993	556.198	1390.07		446.501	789.084	253.658	728.305			888.137	980.657	464.556	1684.05	731.837	943.873	1118.61	3044.79	700.557			878.452	627.583	1	239.645		1662.79	916.951	899.374		427.535	426.757	658.576			1643.03	1041.34	664.538	2406.66			280.329
O95372	Acyl-protein thioesterase 2	LYPLA2	3	3	5050.35	2208.08	10944.5	4517.67	3279.11	2457.62	4557.53	2557.72				4435.96	4007.94	2702.71	3800.74	4894.39	2741.27	7868.57	11998.9	455.356			2901.54	828.119	590.607	1705.32	2814.45	8678.79	1691.84	3507.39	5411.64	1586.41	2957.01	2476.59			2671.06	3437.76	1860.03	1381.32	1991.86		1598.04	4432.92	1345.46
O95373	Importin-7	IPO7	14	14	4093.63	3072.57	5566.67	4011.65	4011.49	4680.39	2728.83	1914.19	5492.32	4128.04	12843.8	3119.61	3208.25	4580.75	5314.54	3242.55	3850.32	3125.47	12603.1	3181.8	6134.76	1296.55	3149.64	7367.32	2835.46	4682.6	3744.02	2243.88	3637.36	3258.55	11522.7	2901.22	2130.2	2174.85	6161.38	4044.05	1504.24	1766.13	2172.86	1943.72	5340.62	1767.83	1548.74	1893.28	19347.6
O95379	Tumor necrosis factor alpha-induced protein 8	TNFAIP8	2	2	6835.88	10140.9	3357.12	8721.08	1855.09	17543.9	18913	14100.8	24550.4	7788.61		6424.16	7621.97	5201.81	6636.57	9634.35	20337.2	3197.26	51824.2	9743.21	1432.67	1415.36	14355.7	12975.7	6395.3	5342.42	16323.7	12073.8	23616	27219.6	36303.4	11794.7	12349.8	16769.2	9966.69	18961.7	19770.2	23344.7	15372	12398.3	3439.19	11725.6	6864.38	1972.4	4988.03
O95394	Phosphoacetylglucosamine mutase	PGM3	7	7	6744.38	1538.67	2936.64	1271.2	14333.9	1947.19	3230.76	3574.56	4226.69	11489.9		2755.89	2912.36	2014.74	3148.39	3820.93	1546.01	4374.69	2810.08	1215.62	3931.26		1972.87	4702.93	24987.8	2502.61	2829.43	1713.82	1988.08	6954.1	8230.8	4590.29	4464.54	11308			1490.15	2499.94	1672.9	459.792	13514.3	6496.65	3289.35	7065.73	6847.93
O95396	Adenylyltransferase and sulfurtransferase MOCS3	MOCS3	2	2	517.037	876.871	303.383	820.195	1652.21		419.265	578.795				341.368	440.116	602.853	262.011	984.486	112.658	2080.21		236.294				1685.14			268.992	377.945		184.353		272.921	94.3365	316.958			747.148	1121.91	613.217				683.352
O95400	CD2 antigen cytoplasmic tail-binding protein 2	CD2BP2	6	6	4893.6	4926.96	4839.66	2429.97	3431.89	14303.3	9681.35	9613.51	9094.44	8036.14	99239.9	7182.07	4740.82	15326.1	3217.05	5311.97	2865.76	1890.5	17307	16433.8	12258	16523.3	8262.81	7400.21	4255.72	2677.03	13423.5	5281.67	8306.41	2878.37	11429.3	9307.5	4307.26	5883.83	6499.31	18635.3	8609.54	6397.87	8930.71	7930.78	4500.61	139399	3845.12	3654.9	4561.44
O95402	Mediator of RNA polymerase II transcription subunit 26	MED26	2	2		969.62	2962.42	1654.99		847.142	738.087	318.04	4088.14			1641.37	3029.43	2097.11	1529.47	1301.49	1654.2	1315.95	4275.2	1			2396.66	861.568					824.809					448.563			246.56		1262.86
O95433	Activator of 90 kDa heat shock protein ATPase homolog 1	AHSA1	13	13	6904.19	8015.33	5639.78	5870.16	9547.51	12817.4	6552.36	5669.9	8113.24	15506.7	71000.3	7257.55	6957.56	8658.67	14061.2	7472.52	9240.58	4880.38	12203.7	7401.23	14097.7	14936.5	9925.89	5448.31	70931.9	30758.9	28919.8	10280.7	12119.1	6193.38	13409.8	12060	10935	14236	20941.2	119625	6711.37	15869.8	7591.24	8173.67	8989.5	10399.9	10891.4	11719.6	15056.4
O95445	Apolipoprotein M	APOM	1	1	16138.8			541.275	2889.88		1083.89		2434.71			5625.25	1543.92		662.723	1276.86							325.988	2247.93		17635.8					4036.87	2430.13		1012.46				1131.49			7822.46		1245.74	1534.68
O95453	Poly(A)-specific ribonuclease PARN	PARN	5	5		771.392	1440.28	1275.65				1224.4	1344.87			1662.37	1332.05	1324.62	1851.61	2281.29	2709.29			687.801	3355.35		1675.19					1051.18				319.49	882.68	334.68			2397.75	573.18	5989.22	443.587			794.09
O95456	Proteasome assembly chaperone 1	PSMG1	4	4	4185.35	3317.98	7993.45	5617.11		7113.58	2623.61	4798.55	1262.42	496.927		1390.82	4498.05	3108.27	4463.02	1265.53	5591.88	1178.81	7739.51	3543.39			3143.38	2149.31	4607.01	9964.08	4480.75	3464.16	8057.09	4110.26	2766.57	6372.46	3001.68	3748.25	5579.14	13206.4	2307.09	2738.58	3860.61		1926.31	888.131	2203.35	728.541
O95466	Formin-like protein 1	FMNL1	8	8	938.622	2490.19	2715.99	2099.99		5835.18	914.599	2898.73	4303.58	2267.26		906.846	2861.02	1739.46	487.872	775.085	1058.43	587.141	3385.27	3741.16	3028.94	9116.08	8030.14	2381.29	1542.69		2176.69	1150	3130.38	3947.62	4560.23	3832.78	2288.57	4360.76	3198.75		2785.04	2616.04	3038.23	4033.78	2504.31	2231.15	1221
O95470	Sphingosine-1-phosphate lyase 1	SGPL1	3	3	1907.03	926.199		880.195				2498.19				389.637	620.393	2069.52		2181.87	217.225	1565.46		1			1161.56	478.685		3513.89	973.875	2719.22		2496.32		1375.45	76.9027	2163.18			2510.69	1764.43	1340.85	3407.58	1	2669.04	1235.16	1209.11
O95477	Phospholipid-transporting ATPase ABCA1	ABCA1	1	1	520.737	361.037	148.3	757.996			605.788	974.919	2985.72				137.418			1679.51		37851.1		385.676			3260.74	3431.73				963.89		1806.69				403.651			678.694			1382.11			377.848
O95478	Ribosome biogenesis protein NSA2 homolog	NSA2	1	1		575.59	341.821	329.843				749.922						621.262		238.555				1147.34			944.611				1065.84	1408.37									6296.25	2639.88	3568.02				733.432
O95479	GDH/6PGL endoplasmic bifunctional protein	H6PD	11	11	4330.29	1784.04	2288.54	3543.43	351.138	3189.68	4349.57	3234.28	2634.28	2100.04		1632.24	2357.4	2247.71	1484.98	4032.44	2026.22	6663.9	1647.48	4798.52	2883	2672.78	4294.28	5683.37	2297.05	3237.58	1934.89	2062.58	2045.38	2385.31	52841.3	2002.25	1233.42	1453.39	5208.55		2076.43	3283.4	1672.28	5384.59	2415.2	2152.74	1112.25	1125.29	2392.04
O95486	Protein transport protein Sec24A	SEC24A	4	3	7486.07	1933.14	2398.38	2334.88	3898.66	3435.5	2648.74	1100.75	6187.72	2391.1		2652.53	2160.17	3551.54	2630.45	2867.65	1593.34	1161.1	4992.25	4396.63	7388.74	1359.25	4500.45	6087.72	902.677	2124.98	705.134	1784.95	2083.07	1096.85	1259.77	3872.35	2436.48	1247.36			1207.65	2223.83	2193.9	996.081	200.303	2530.48	1061.91	1044.24
O95490	Adhesion G protein-coupled receptor L2	ADGRL2	1	1					1374.56
O95498	Vascular non-inflammatory molecule 2	VNN2	1	1	5152.26	2179.47	1617.13	815.195			1887.32						1110.98	425.796		299.573		856.181		577.261	2359.95		902.114	2547.79						473.677	2148.16	1993.21	127.571				380.793
O95502	Neuronal pentraxin receptor	NPTXR	7	7	2433.3	951.924	4652.78	2498.71	33548.9	818.631						2731.55	741.675	1508.61	1494.33	2413.36	1527.84	7534.19			27398.2		1553.32	7963.48	13669	7128.91		2255.73					1560.96	3922.4	1.45556						3732.69	12954.1	2768.33	10112.2	23771
O95522	PRAME family member 12	PRAMEF12	1	1	7707.69	248.145	95.502		1667.37							1060.49	531.133	1397.95	213.722			212.645						2796.07		37216.3		480.91				32.9254	539.197	324.322		16357.1	3615.74	689.125			24816.9
O95544	NAD kinase	NADK	1	1	4892.42		713.226	370.357		3635.22	2662.61		1716			827.689	1045.44	901.594	3184.57	756.578		2711.63												1621.86
O95551	Tyrosyl-DNA phosphodiesterase 2	TDP2	1	1	1665.54	2245.2	1981.46	1883.58		1759.71	1669.49	1575.87	1163.41			1282.27	2039.1	2215.16	1403.62	1348.49	1670.07	1209.77	3348.06	503.648			4046.41			652.117	1099.41	1986.48	735.546			2658.07	1225.43	1352.42			2733.07	306.453	1841.04				318.275	278.985
O95571	Persulfide dioxygenase ETHE1, mitochondrial	ETHE1	9	9	12794.2	3766.62	4115.19	2389.6	5467.71	9628.43	6241.25	4661.87	4442.2	13642.2		3259.9	3147.23	1413.17	768.16	4119.1	3716.29	3047.3	15472.1	8646.62	33504.6	9902.52	7709.68	12988	7247.88	4719.82	3424.97	3843.04	9675.54	12308.9	15410	3046.25	2178.61	3040.05	8572	4766.11	1740	4678.87	2350.23	6513.74	6172.3	16073.8	1809.7	4158.52	7298.35
O95573	Long-chain-fatty-acid--CoA ligase 3	ACSL3	3	2	2616.88	1617.37	2157.67	2376.78	1528.24	2556.19	1021.62	3478.97	2511.8	240.239		1288.57	1024.27	1795.59	1272.08	1646.22	1087.74	1686.24	1038.99	3773.42	1417.49	32357	3031.75	1021.36	4907.74	1569.67	3645.85	3376.95	2205.76	3568.26	5410.36	1974.48	3299.09	4678.46	72594.2		6556.08	10940.6	2143.78	2714.01	4065.44	2782.89	3750.29	3473.86	18804.5
O95602	DNA-directed RNA polymerase I subunit RPA1	POLR1A	3	3	691.695	340.296		822.071								335.733	204.799	147.011	522.463	476.093	1255.7						291.927					530.107					1			1.37427	365.892	102.391	726.379
O95613	Pericentrin	PCNT	2	2	669.101	892.486	876.268	2354.05				312.985	7687.17			4545.65	1799.99	2044.1	1509.42	410.602	684.242			1			1845.64					530.578		504.047			1015.55				1538.46	5622.17	2207.33				2980.1
O95622	Adenylate cyclase type 5	ADCY5	1	1					1634.81													2210.62															202.833										819.109
O95626	Acidic leucine-rich nuclear phosphoprotein 32 family member D	ANP32D	1	1			2153.63	942.109		24808.6	3167.96					2130.36	9814.65		5478.26	5304.42	3829.31	2089.21	141616					8043.37				12238.3	71544.9	28791.5		14118	11660	43527.7			2426.86		23306.9
O95630	STAM-binding protein	STAMBP	2	2	14076.4	4533.59	6618.02	4681.08	5948.46		5307.51	5972.19	3688.23	7831.9		4180.64	7680.51	7026.54	5914.22	6300.43	7241.51	1207.98	9324.92	5760.7	13878.2	4330.45	9451.79	6035.99		3617.27	10927.8	6171.36	14209.7	21531.4		215.613	6954.3	7730.62			12086.1	6365.69	13874.5	11427.5	8687.86		7859.21	9361.34	20400.9
O95631	Netrin-1	NTN1	1	1				74.5329	1		1101.85						367.86				15.9088	1116.67						1				717.126		185.647	3.08892					3.44188	1037.15			1	1.07321		118.251
O95639	Cleavage and polyadenylation specificity factor subunit 4	CPSF4	1	1	472.719	908.488	1213.2	1708.48		3929.88	1504.6	1954.52	1170.91			1737.95	2813.7	6648.38	2538.41	1655.26	3240.62		6472.8	4077.48			2147.29	1036.27			4551.18	1845.34	1506.43			1748.58	658.945	668.41			4273.56	243.913	1502.84	901.376				863.02
O95644	Nuclear factor of activated T-cells, cytoplasmic 1	NFATC1	8	8		1444.5	1954.7		303.215				4472.96			845.423	2070.24	2574.83	1674.98					949.817		1359.17	2972.23					1661.96	818.778	433.419		856.071					1738.96	1242.36	152.208				630.246
O95670	V-type proton ATPase subunit G 2	ATP6V1G2	3	3	240.706	7366.83	8687.66	2804.54	11718.5		703.379	1053.26	10134.8	51322.3	52137.6	3223.09		2340.11	1723.16	744.504	703.948	18698.6	397.505		59473.3	19112.6		3959.34	14035.9			1998.88					3916.61	602.612		993.051	213.421	118.928	283.705		8615.82	637.932	5477.06	16957.4	74611.9
O95671	Probable bifunctional dTTP/UTP pyrophosphatase/methyltransferase protein	ASMTL	6	6	181.745	693.264	641.182	587.52	380.618	769.039	906.669	855.944				884.584	2655.27	516.83	190.185	1610.13	34.3822	3969.17	1041.04	285.506	2799.19			414.653		965.441	1	185.782		1131.12		2505.34	777.494	494.626				476.69	1364.47				283.261	216.837
O95674	Phosphatidate cytidylyltransferase 2	CDS2	1	1	12712.2	1991.09	1770.52	2189.73	29181.6	42125.3	4521.64	4415.14				1956	4081.24	5595.95	717.706	3662.31	9944.46	6082.63	5222.51			3877.92			10349.1	5057.3		3720.78	7320.2	15295.5		1509.03	2835.33	4779.13			4815.05	6791.75	5554.99				5628.76	5320.33
O95684	Centrosomal protein 43	CEP43	4	4	1135.14	1570.34	1566.2	825.808		1318.73	1253.91	327.083	784.071			946.882	3125.58	1994.36	2069.23	1163.91	1488.16	871.772	4282	713.224			1801.66	655.558				609.087	833.375	400.59		846.439	446.2	895.021			1055.24	57.7059	638.731				256.504		1
O95707	Ribonuclease P protein subunit p29	POP4	1	1			441.129	367.555				874.937				361.662	714.725	521.587			825.137											256.578									969.616	238.17	1014.38				831.21
O95714	E3 ubiquitin-protein ligase HERC2	HERC2	1	1	303.265			1	220.592		110.58		272.789											1	5.27587		1324.84	1660.25
O95716	Ras-related protein Rab-3D	RAB3D	5	1	1561.97	777.128	1938.72	122.656	32713.3	199.694	265.662	1		968.365	115868	3868.89	161.314	247.506	45.1339	80.996	479.182	3278.8		178.421	70123.8			5026.54	44735.7	3746.45	86.1637	3366.98	2676.43	1	788.642	157.978	5259.52	4661.09			841.641	1374.59	1847.86	1805.09	1699.95	5199.37	6424.43	41962.7	86508.8
O95718	Steroid hormone receptor ERR2	ESRRB	2	1	13430.6	4851.06	11148.3	9370.78	125350	12140.6	13344.4	13429.7	16018.6	39524.1	408653	10032.8	18751.6	8090.56	4497.21	19449.9	8064.72	59320.8	5234.69	11041	214621	46539.1	7318.91	28290.4	75275.9	26160.8	15675.5	12989.1	32969.3	23388.9	17026.5	6422.7	12040.5	29707.4	29937.8	19757.2	18156.6	40645.1	19399.2	29019.1	40003.6	64245.2	29399.4	34867.9	70284.9
O95721	Synaptosomal-associated protein 29	SNAP29	4	4	2603.59	2161.14	1907.54	1359.76	4150.56	4139.44	2706.46	4721.17	15679.4	1530.42	42183.6	1541.5	1715.75	1412.97	2240.52	1275.51	2541.6	11268.3	6163.57	8117.57	5822.86	2313.91	4339.28	5115.83	2460.96	303.367	3193.73	1495.82	3235.15	2688.69	2918.07	1947.1	1354.34	2195.47		1318.15	2189.45	2221.81	1979.67	4002.12	3240.54		1996.92	2431.43	3196.38
O95741	Copine-6	CPNE6	14	14	221.845	1032.99	1685.74	357.385	18611.5	1207.59			2812.27	1900.5		2147.43	632.381	386.08	1007.96	257.45	156.812	10199.3			15398.8	5142.18		2389.25	4952.73	2393.46		1433.12					1521.21	3704.14			171.497	3366.94	891.122	344.877	1642.7	1360.08	4907.73	9063.94	18962.1
O95747	Serine/threonine-protein kinase OSR1	OXSR1	13	11	8917.94	4719.73	15974.2	9666.99	6571.67	16587.2	10649.2	6519.46	12353.7	7676.28	26689	6758.25	7751.53	7385.84	8796.89	7710.14	14422.8	5597.7	18707.4	6194.7	12416.3	7538.91	13601.7	7655.56	9740.12	11690.2	8293.6	5024.66	11397.9	6813.8	12228.9	8716.77	6241.86	10682.2	3049.54	4769.44	5838.7	6070.34	9013.92	8051.76	5921.37	6569.25	4049.93	3695.6	10713.7
O95749	Geranylgeranyl pyrophosphate synthase	GGPS1	2	2	539.157	848.258	2813.01	1509.23	2356.15	876.675	1470.21	354.288	5450.82	619.436		671.572	1618.2	1095.21	1872.38	720.55	8090.31	1418.07	2188.38	3784.25	6649.08	3181.3	2025.1	1721.73	1141.83	2801.89	1	452.205	2282.48	2434.25		766.295	974.739	1804.22	7044.16		181.267	1258.39	413.081	2518.66	2875.46	1523.71	832.597	1376	3910.91
O95757	Heat shock 70 kDa protein 4L	HSPA4L	15	12	4461.3	2774.38	3496.47	3549.39	19266.5	19302.2	5784.05	2559.47	1913.75	8404.51	6017.31	2972.17	2758.65	1878.58	5786.81	4402.13	3694.23	10246.1	4823.07	2644.53	9962.31	10771.2	2180.15	1404.95	6603.99	6119.47	4483.3	2488.92	4950.33	7551.1	1425.12	4793.09	5336.05	3504.51	1439.98	3624.18	1508.76	2326.26	1804.41	1855.25	6776.37	2008.21	5415.83	8140.12	6580
O95758	Polypyrimidine tract-binding protein 3	PTBP3	5	5	714.628	611.158	441.813	816.31	138.902	786.351	609.631	387.364	1281.24	1573.42		656.489	628.246	849.516	2602.13	1097.51	581.654	1360.45	1917.23	811.729	1597.89		1317.1	2688.61	1438.23	2804.15	2162.93	2511.56	608.135	763.249	3290.43	144.804	304.812	2433.34			1795.81	803.916	773.958	860.934	1	1.17484	995.426	307.585	3175.13
O95772	STARD3 N-terminal-like protein	STARD3NL	1	1	4774.46			2399.29		357.801	2951.42	1139.89					1032.18	956.598	701.392			3428.2						1025.13			831.954	874.18	1664.84	8991.02		1681.56	1695.85	1485.06			1158.07	1805.97	362.957	581.524			2165.61	1344.01	1333.25
O95777	U6 snRNA-associated Sm-like protein LSm8	LSM8	5	5	16115.8	5140.21	5248.6	8211.62	4477.75	9732.95	10062.1	7964.62	9586.48	8907.9	85972.6	9783.89	13042.9	14150.1	11574.4	7050.27	5697.28	6635.74	9212.84	6888.58	23003.8	9905.57	4150.55	4464.65	9293.64	6391.61	11691.7	9459.79	17529.4	29091.8	32665.4	20680	8068.31	22474.4	67526.7	46442.1	10086	6723.08	15128.7	18764.1	10856.2	27892.1	7769.99	8680.63	30736.1
O95782	AP-2 complex subunit alpha-1	AP2A1	20	17	6237.14	3571.05	4784.64	3912.55	30980.5	12434.4	4569.17	4010.23	6713.26	11252.5	98054.2	4803.38	3094.5	3809.34	3543.98	6106.46	4181.86	13420.2	5535.54	3174.25	40352.6	8835.5	5822.36	7672.93	18387.1	12727.2	4729.99	4272.52	3132.36	6504.52	5034.98	2399.36	5081.55	6456.99	10082.7	7329.29	4171.71	5298.43	4434.08	6355.43	13302.4	17417.3	9183.09	13363.4	19176.9
O95785	Protein Wiz	WIZ	2	2		418.293	275.994	1270.2				612.549	624.441					305.608			543.171						1008.88					427.055									1035.69		1795.51				413.857
O95786	Antiviral innate immune response receptor RIG-I	DDX58	2	2	5144.75	3131.07	2037.08	3083.33	1729.55	1996.35	8810.5	4824.35	6005.93	2677.44	1200.56	2755.34	2661.58	3161.28	2519.56	9296.15	597.287	3152.07	7373.5	11350.2	2017.98		10296.5	13134.2	896.465			1246.52	572.143	3123.72	4150.16	897.495	1108.36	2576.57	11270.3	180.655	3171.59	1566.93	792.815	1553.63	195.417		753.138	614.411
O95793	Double-stranded RNA-binding protein Staufen homolog 1	STAU1	8	8	3477.6	5123.69	5570.38	7492.98	3559.62	4110.34	2879.79	3367.14	15385.5	2899.16	22561.7	2244.65	4066.9	5079.34	5392.05	3311.64	5302.3	3616.48	3750.64	4844.02	5967.94	4879.28	9495.99	2848.31	2222.63	3055.65	2582.98	3383.86	2656.97	2461.11	3520.08	4424.51	1942.44	3591.88	1054.82	7855.82	3244.56	3774.73	4120	3898.29	2393.97	2486.88	3005.93	2464.52	3190.59
O95801	Tetratricopeptide repeat protein 4	TTC4	1	1		1	1										1		1		281.617												1	1		1	1				1						1
O95807	Transmembrane protein 50A	TMEM50A	1	1	19731.2	3698.8	1806.48	4713.01	5690.61	532.238	3572.48	2410.88	6054.06	8457.89	13644.2	2772.13	1236.54	1201.89	1617.23	6192.88	3294.68	9668.43	17799	5761.47	1831.47	13436.8	4573.31	7889.39	14125.7	4089.06	2354.92	3894.23	13705.7	14757.3	14538.4	1665.54	3833.24	3959.08	2524.09	2650.48	2394.13	307.81	2811.31	3875.38	3351.6	396.859	4024.62	5787.88	3637.42
O95810	Caveolae-associated protein 2	CAVIN2	3	3	2317.23	2924.36	3643.14	2486.93	9063.49	8217.53	2171.15	854.927	19183.6	5308.65		1974.25	770.313	841.183	1070.2	2931.6	5042.25	37150.9	1958.87	2697.53			6192.22	4493.1	4043.88	7261.72	2018.79	1170.62		392.803	1673.91	116.759	252.507		5703.96	4009.5	3511.03			2747.17	1089.81		1344.5	3639.19	4729.24
O95816	BAG family molecular chaperone regulator 2	BAG2	6	6	46074	24599.1	25654.8	28251.9	10389.3	32779.1	11307.1	15367.4	56179.7	24503.1	244368	21445.9	18066.2	28305.7	21895.9	18142.6	30231.4	12214.2	93289	22994.6	20959.1	55884.6	26743.2	8635	7808.54	6862.29	21539	17985.3	18354.4	10452.7	9629.8	10810.9	7092.48	8885.59	24425.4	76525.3	16849.3	10842.5	15331.2	16266.6	9051.85	17921	9525.56	10677.4	19355.9
O95817	BAG family molecular chaperone regulator 3	BAG3	8	8	644.677	3215.41	2038.19	1580.06	4766.04	413.927	1860.81	2785.14	3236.88	19950.1	2106.71	3040.24	849.847	1893.19	632.664	1733.25	949.213	7481.02	2776.33	910.581	11139	21921.7	772.753	3408.16	6038.68	15944.7	2152.68	2463.33	1219.86	3444.17	2690.15	473.873	3128.18	3273.05	11120	5010.75	4238.29	5045.39	2921.79	1578.57	4880.37	13938.6	6896.87	6693.12	9755.83
O95819	Mitogen-activated protein kinase kinase kinase kinase 4	MAP4K4	6	6	917.638	2711.51	3575.37	7013.98	3830.86	4159.47	1327.94	953.854	7708.07	6362.85	20980.2	1980.87	4357.12	5503.11	5187.47	2803.95	2343.99	7050.68	18958	4720.07	5177.54	6565.66	4614.82	2837.95	4698.64		3949.4	3208.84	11371.7	7941.41	4735.76	5352.94	2100.31	5634.86		5888.6	3216.2	2943.52	4439.71	4581.11	5952.24	3821.59	2237.03	3738.55	4872.81
O95825	Quinone oxidoreductase-like protein 1	CRYZL1	4	4	118295	14795.8	1690.87	1462.88	3612.56	1438.34	11033.3	794.481	40927.3			7989.76	23018.8	32941.4	285.269	9995.21	429.595	7407.1	537.42	42152.3		58893.8	106794	20396.3			40023.2	25369.2	21777.7	10556.6	1.14515	25732.6	4895.09	1598.2		77303.4	28678.9	33617.4	35079	53181.6	1599.71	34871	5630.44	8432.21	10738.8
O95831	Apoptosis-inducing factor 1, mitochondrial	AIFM1	8	8	4857.06	2336.64	5772.03	7850.01	3411.4	5016.7	2880.87	9673.9	7315.68	1953.53	41811.5	2532.22	2833.05	5071.13	1326.43	8689.37	3952.47	5035.64	4629.47	5084.04	9245.14	14613.9	8849.22	3977.42	12187.1	15212.3	7110.71	8953.21	4235.13	16316.1		3638.74	2898.93	8586.66	4936.75	12658	12842.9	11943.6	12345.3	8976.38	8708.33	17013.2	4687.76	3420.11	5004.02
O95833	Chloride intracellular channel protein 3	CLIC3	5	5		6790.21					1043.46	15761.2			24.0899	1134.64	3307.96	5256.04				8861.8		64121.5		1838.59	282.453	96969								81.1056	19.5557			2.76859	3309.67	92.3025			1895.83	7.84927	1158
O95834	Echinoderm microtubule-associated protein-like 2	EML2	7	6	1382.66	1857.47	1390.92	1336.04	914.829	4828.26	3370.07	1866.28	1427.3	1637.23		534.585	1288.44	1227.2	823.638	2184.17	2151.82	1610.07	2958.47	1977.89	1171.09	381.11	1191.2	1896.16	3518.1	5198.65	2682.98	1039.32	1558.88	3095.56	816.273	1298.28	1954.96	935.847	4577.43	2131.79	1649.19	2771.45	1273.26	1454.94	1321.28	1952.77	1076.28	1267.06	395.746
O95848	Uridine diphosphate glucose pyrophosphatase NUDT14	NUDT14	3	3	721.542				1874.25			140.271				637.756	101.027					6505.13							831.881					212.963			1601.13										618.953	4024.02	5056.34
O95858	Tetraspanin-15	TSPAN15	2	2								209.612														6154.23											1293.74						963.176		3780.54		7243.1	3922.26
O95861	3'(2'),5'-bisphosphate nucleotidase 1	BPNT1	11	11	2329.29	2009.16	4410.63	4339.07	3898.62	1975.25	4533.17	2419.22	4593.48	3734.64	44238.1	1399.75	3108.79	4925.81	4740.79	1472.67	5310.37	1297.19	7149.64	3543.22	1739.42	2890.61	3399.56	2542.11	2696.71	4508.64	6061.49	2491.36	3456.51	4892.58	5769.23	4209.03	3111.02	5375.32	5200.26	468.94	1739.66	2086.2	3845.04	1836.32	3987.21	2733.49	1885.7	3136.5	3850.93
O95865	N(G),N(G)-dimethylarginine dimethylaminohydrolase 2	DDAH2	5	5	9879.65	12049.5	7500.92	7929.78	23324.2	16514.5	21735.2	8277.86	18636.9	84937.7	119197	19107.3	8960.14	7961.54	12545.6	22058.9	6377.95	25302.2	15737.9	7905.74	57179.5	57126.3	11305.7	38371	31781.5	44092	18563.6	9331.01	24145.9	22299	88272	10397.7	29077.6	18505.3	117249	45841.9	4664.4	14190.7	8932.63	25722.7	52328.8	74978.1	20983.6	53174.5	80753.2
O95870	Phosphatidylserine lipase ABHD16A	ABHD16A	1	1	7504.75	5919.12	3955.47	4178.58	11890.9	2510.91	5246.69	5134.72	10856.9	12081.3		3642.18	2684.55	2858.71	3078.97	7458.3	2141.52	13646.4		8351.57	23015.1		11428.1	9486.07	5412.51	2676.32		5110.69		6410.07	6439.17		4346.48	2886.42			3873.73	5791.54	1773.44	10189.9	7345.29		7859.91	3820.34
O95873	Uncharacterized protein C6orf47	C6orf47	1	1	6719.88	1358.83	3504.88	2048.24	1142.22		634.314		4118.14			1602.63	1383.19	733.458	2764.99	1659.57	1059.55	973.674	1914.23				1720.67	2530.68						2347.84		282.972											1784.17	1266.63
O95881	Thioredoxin domain-containing protein 12	TXNDC12	3	3	18863.6	5652.69	13878.7	8671.16	19376	20067.1	23297.4	15417.6	34397.4	18869.3	51436	13941	15005.2	15078.6	10897.9	16772.4	17327.4	22953.5	33952.5	18358.9	62415.5	13393.9	21257.1	24821.6	17696.9	26370.2	28766.4	11939.1	29257	27641.7	61829	26227.5	13929.1	22219.5	126879	44762.7	8197.3	14642.1	19788	25662	57817.5	71736	9442.39	33469.6	63404.1
O95886	Disks large-associated protein 3	DLGAP3	2	2					4580.62							1162.3	677.585							1	2124.24			1075.18	1.56778			443.957						141.183					1				253.257	161.93	615.33
O95900	Mitochondrial mRNA pseudouridine synthase TRUB2	TRUB2	1	1		415.165		1125.05								1012.68			291.601								670.157					897.491				538.889							704.81
O95926	Pre-mRNA-splicing factor SYF2	SYF2	2	2		932.691	884.026		122.06		142.809	1777.3	817.409			86.2344		1175.3	71.54		931.869			554.203			3989.81				71.4403	476.293				334.294	116.627				1647.15	1519.67	1558.25				168.024
O95936	Eomesodermin homolog	EOMES	1	1				49.5644									103.137							1302.45			694.455
O95969	Secretoglobin family 1D member 2	SCGB1D2	2	2	3121.71	40132.5	16096.2	24364.9	21512	492.669	2508.55	9363.27	4454.96	85037.8	1.2204e+06	2553.65	2371.07	8187.62	10916.2	4008.07	1005.86	9221.19	5212.96	16891	91351.6	946601	10002.8	36740.2	161491	13238.9	10879.2	2859.62	68846	7497.14	45088.4	10712.6	6802.38	4542.2	1.30009e+06	341903	22344.7	52979.6	10823.7	61156.8	58539	241288	52393.5	50167.1	94388.8
O95970	Leucine-rich glioma-inactivated protein 1	LGI1	5	5	798.008	1	389.919		5082.59					1677.48		574.73				757.519		5818.73		1590.65	13267	3863.25			4700.57	592.935		974.175					1107.98	392.939			125.289	681.138	2097.13		774.203		3409.7	4409.74	1532.07
O95983	Methyl-CpG-binding domain protein 3	MBD3	2	2	655.133	1278.65	1854.06	1210.44	769.303	3964.69	2463.27	2496.86	575.404			3106.47	2887.58	6076.52	5734.29	2749.17	3223.9	6985.61	6892.23	311.1			1650.7			2846.25	4380.84	1609.66	2040.62			799.496	1109.57	782.616			1991.91	2264.58	2368.72				1150.19	1138.02
O95989	Diphosphoinositol polyphosphate phosphohydrolase 1	NUDT3	5	5	25600.4	4482.81	7210.49	5086.97	33688	33317.5	11802	13263	11301.1	22969.3	77310.6	14658.5	7977.49	9304.33	23427.9	5684.26	7511.04	17726.4	16424.4	7825.5	35275.3	26675.4	9448.85	12865.9	39887.2	23640.9	14170.5	4420.97	13716.5	15321.2	36072	11267.1	27541.9	14939.5	71514	23154.7	3491.89	3107.46	5955.62	34929.3	92632.8	100035	13748.6	50109.2	150741
O95994	Anterior gradient protein 2 homolog	AGR2	1	0							1907.11	54.0877									567.592					13658.7
O95997	Securin	PTTG1	1	0			1523.03									1359.64	2560.11	5073.87	3267.24		1795.31						3462.92
O95998	Interleukin-18-binding protein	IL18BP	1	1			6601.75	4919.78	10232.6							3311.04	4880.88	2908.49	7901.28	6393.89				470.85			32989.7	8044.45				1672.91	994.869			634.643	814.358				666.918		1389.97				1551.04	1829.03
O95999	B-cell lymphoma/leukemia 10	BCL10	3	3	6209.39	4301.66	5717.05	2986.92	1184.68	8072.37	3664.3	2992.43	5267.19	2160.14		2243.26	5509.29	5593.08	4058.2	3570.64	3615.52	3512.65	21046.7	3005.76			7027.3	4727.06	3191.65	5015.58	1367.63	1888.95	3080.81	1263.64	1765.14	2698.59	1276.03	852.206		2080.7	881.309	2171.16	1033.56				2727.1	983.049
O96000	NADH dehydrogenase [ubiquinone] 1 beta subcomplex subunit 10	NDUFB10	4	4	7602.03	4900.43	9572.96	4197.85	23699.3	3034.63	3737.15	5539.33	15950.8	28683.6	85356.2	2922.4	3407.61	6623.59	7092.73	2774.63	6776.42	11681.1	1583.65	7290.38	45935.5	24205.7	7036.61	6368.23	4009.66		2044.92	3964.82	140.982	1376.69	1076	1393.67	2857.04	856.339	1806.26	11789.2	2688.28	4516.44	3721.19	3879.96	9040.42	4850.07	3461.59	10548.5	32899.1
O96005	Cleft lip and palate transmembrane protein 1	CLPTM1	2	2	1870.66	724.542				3750.55		2073.66				454.799	157.967	3194.84					701.758							1283.39	1502.12	2333.18	1950.06	2400.99		1928.36	2243.08	347.988		1442.41	2594.9	4787.5	2169.37	680.714	1756.58		3362.24
O96006	E3 SUMO-protein ligase ZBED1	ZBED1	1	1			513.291									88.2591	535.289	541.177		312.044	288.277		339.198				269.415																118.392
O96007	Molybdopterin synthase catalytic subunit	MOCS2	2	2		2342.26	1450.08	1615.44	3638.13	4148.37	3381.74					1496.01	1720.33		3222.26	2697.24	2137.48	3385.48	3762.82						1159.59			631.41		3153.55		800.728	2165.8	390.354			556.183				2918.22		1491.47	4710.72	4912.69
O96008	Mitochondrial import receptor subunit TOM40 homolog	TOMM40	2	2	6807.8	3457.41	6240.39	7805.81		13931.3	4991.96	6473.12	6247.43	1982.1		10762.1	6161.3	3280.11	5317.27	4923.15	5219.48	1209.79	14331	13586.8	8954.99	4571.25	7934.5	2722.59	6946.13	7199.73	9704.25	14037.7	9183.23	3460.78		13302.4	6705.57	5796.3		18602.4	16022.8	16679.6	16111.8	5959.48	2629.64		5562.59	10177.5	27317
O96009	Napsin-A	NAPSA	2	2		4054.01	2129.3	9523.17			15516.9	5907.46	40373.7			21247	11388.5		4832.18	438.719	10432.3		3953.54				4414.31				3895.07	3715.04				1026.3	4164.9				1702.07	13313.9	1130.06
O96011	Peroxisomal membrane protein 11B	PEX11B	3	3	4663.84	1467.79	1458.77	1611.92	2340.13	2733.56	1826.2	3820.55	6487.13			1284.6	1509.34	3023.06	2010.21	2319.37	4611.9	4833.31		3018.37	6393.06		2424.55	6566.98	4641.1		505.866	1856.59		2847.95		1896.47	1623.83	2010.03			4441.18	3273.76	3609.15	2640.97	2005.25		2077.3	1419.71
O96013	Serine/threonine-protein kinase PAK 4	PAK4	2	2	320.88	349.969	233.579	1329.5		598.545	459.911	140.479		2.448		552.655		558.662	331.314	220.209	935.442	242.234						255.041	1	915.487							134.883	2082.5			648.644	80.3614	103.902				546.865
O96017	Serine/threonine-protein kinase Chk2	CHEK2	1	1		97.1396					177.02	42.3861				117.034	71.2799	1038.25													167.192	367.413	99.5618				419.405	149.566			517.677		307.719				408.392
O96018	Amyloid-beta A4 precursor protein-binding family A member 3	APBA3	1	1				1291.12											3191.46				4146.39									239.554	157.016	2751.66									191.043
O96019	Actin-like protein 6A	ACTL6A	10	9	8789.66	4022.83	5929.96	4093.54	7351.78	6029.76	5271.16	5091.71	10876.2	2599.97	20624.3	3525.73	5828.95	4860.79	5998.39	3000.99	3854.25	2487.82	17966.8	7283.18	1297.94	4825.84	8500.2	3492.63	1916.42	6298.26	7499.48	4132.9	4239.48	8251.68	9675.21	8613.75	2725.27	7305.74	3559.65	10077.1	5054.47	6189.73	7591.87	4123.41	2210.99	1515.52	2336.6	2532.65	6079.34
O96028	Histone-lysine N-methyltransferase NSD2	NSD2	2	2			204.403					224.094				346.969		1193.37			514.143										311.049	779.708		210.79			352.811	118.841	809.402		1578.81	525.224	1349.72				1700.91	15098.5
P00156	Cytochrome b	MT-CYB	1	1	1971.25			1208.79	4277.81							510.13		1343		809.599		4062.7										2780.79		2698.71		381.362	926.423	1763.96			1795.61	2113.39					3368.5	1234.75
P00167	Cytochrome b5	CYB5A	5	5	7209.85	4131.6	8514.01	5568.66	7743.5	10434.9	5930.6	3762.73	19781	7263.9		5832.7	6292.24	3587.7	8838.32	8917	10548.7	94817.2	11034.2	9998.93	6578.94	15618.7	16211.9	4126.95	19420.8	39865.5	11358.1	4741.04	18987.6	16821	27644.9	11157.2	7215.9	8776.67	65880.9	51598.8	4724.55	6603.21	6151.63	15301	13538.9	108514	4910.52	6528.44	17613.4
P00325	All-trans-retinol dehydrogenase [NAD(+)] ADH1B	ADH1B	1	0																				2276.51	4368.37				3068.58	25739.6	2199.84	578.891			2813.36				52951.7	15497.5		651.94		2360.92		29965.6	782.915
P00338	L-lactate dehydrogenase A chain	LDHA	14	14	45641.7	53586.8	80445.5	58571.3	59736.3	55627.1	43651.1	41352.3	69155.8	97228.2	389605	39803	44814.2	75081.2	80123	34484	67800.7	23259.9	38616.1	35073.3	131134	59081.3	58063.9	32795.1	73760.1	129951	80452.5	43107.4	83285.7	61107.3	130475	58604.9	35266.6	67057	470277	273174	41067.9	48192.9	44847.8	94747.3	104253	365187	38158.1	41893.2	123364
P00352	Retinal dehydrogenase 1	ALDH1A1	13	13	4570.11	1863.83	1700.02	945.48	4164.21	4831.33	10949	3724.33	2059.45	7838.22	7.73931	1635.52	2109.9	5105.99	2348.06	1047.94	808.321	13759	2238.15	11050.6	17569.8	5231.96	3845.59	6305.15	11025.9	75120.4	22639.9	4439.14	11372.1	20845.6	25556.6	2041.44	5113.64	2610.25	208230	112715	2808.87	9877.64	13319.6	47655.7	15491.7	109186	8504.18	10526.2	46167.5
P00367	Glutamate dehydrogenase 1, mitochondrial	GLUD1	19	6	12807.5	9705.28	13885.3	10949	46825	7635.68	8722.63	9964.4	29178.6	47393.3	400180	9308.56	8351.56	7410.13	8204.34	10355.7	11645	19063.2	15386.7	16524.4	82157.4	40532.3	15699	16486.4	31037.4	20428.1	16759	9748.75	18293.4	13644.7	13641.2	8961.59	9387.79	7727.44	22842.7	11058.3	5824.56	11259.7	9749.43	12205.1	19777.8	263223	20568.7	32596.8	57116.3
P00374	Dihydrofolate reductase	DHFR	1	1	404.619	366.79	210.159			1557.43						234.543	1452.33	1556.52	2768.82	1	259.945			1			475.162				569.731	2598.38	757.452			2330.04	949.667	1055.87		1361.49	219.936		563.625				348.517
P00387	NADH-cytochrome b5 reductase 3	CYB5R3	12	12	8003.61	14094.1	15314.6	8585.75	15597.4	4847.58	8387.85	14857.8	20571.3	31384.4	79866.2	6083.01	6814.72	14598.1	6540.74	6316.37	9092	7960.81	9259.18	16954.8	49822.5	37928.9	11613	11985.1	10825.5	11475.7	6349.1	7999.27	7385.84	8824	7204.2	10080.1	6789.1	7689.06	13494.2	4517.07	12241.3	17984	11092.6	10513.3	26577.4	21990.6	14930.8	15225.6	17820.9
P00390	Glutathione reductase, mitochondrial	GSR	9	9	13892.6	4277.96	4694.89	6390.96	10547.6	13860.7	8987.99	7503.72	12564.7	8003.13		2956.06	4946.82	5934.94	6748.27	6371.54	7149.22	9035.76	9731.49	8075.96	23498.9	32554.6	8024.05	6818.11	9645.07	23668.8	10223.2	5136.74	11940.7	17366.6	9489.96	5958.46	5393.62	6696.77	35443.6	15923.5	3482.87	6542.26	6811.09	7864.37	6947.55	16882.6	3844.67	3814.84	7719.45
P00403	Cytochrome c oxidase subunit 2	MT-CO2	5	5	151316	61416.2	43314.1	58663.8	320031	106931	85052.9	53337.2	8844.03	186993	868948	56530.5	62815.6	120363	53380.6	63307.4	43268.2	106890	73088	52094.6	449224	163921	67348.4	75075.7	186907	174237	114209	95386.9	67798.4	148857	268918	66657.8	107039	130381	133771	234088	104115	72271.4	145677	133162	151021	287859	130355	273733	890839
P00441	Superoxide dismutase [Cu-Zn]	SOD1	7	7	8196.46	4970.24	10963	8226.42	20170.8	11496.5	19236.8	7831.08	12723.4	9829.09	48000.7	11464.3	13543.3	4044.18	14877.7	12672	9895.82	19529.8	35737.6	9065.6	22642	73253.6	4402.15	11813.4	51002.7	37734.8	30342.4	13069	31386.6	26477.3	75337.7	25367.3	64344.9	33983.4	70907.2	21692.5	7852.92	13778.5	14231	21947	60237.2	63830.5	25593.7	99048.3	233308
P00450	Ceruloplasmin	CP	17	17	44409.4	8137.15	16263.5	8734.78	12026.6	7266.86	8718.47	15536.1	30168.2	15240	42933.5	5541.53	2652.06	4967.85	2708.25	8641.6	2183.61	6450.84	4299.72	1907.96	37412.4	35341.9	4284.69	5274.83	13099.9	21105.9	5062.52	3004.5	4797.88	6157.29	29280.6	2850.74	7004.81	6741.17	74781.2	39920	2899.83	5009.75	4177.26	11780.6	21790.3	51075	6912.59	5107.52	12777.3
P00480	Ornithine transcarbamylase, mitochondrial	OTC	1	1		2092.6		3899.45			2868.78	12794.5				1254	3445.77	2448.44	1843.22	3959.89	4277.87		4973.84	3853.6					1847.47	17836.7	4073.97	5370.19	14372.3	11873.2	18071.8	3622.21	3296.12	6634.48			4860.2	3768.7	2459.84	5110.94	4727.1	16018.5	3581.48	3004.35
P00488	Coagulation factor XIII A chain	F13A1	15	15	3610.98	4922.07		1472.86	183.167	810.327	5796.91	5867.91		21204		3259.92	576.425	775.347	187.852	14414.3	991.294	3695.62	474.411	316.893	4450.74	440.439	706.53	5895.11	1914.84	9378.01	2410.04	191.48	1410.17		43116.3	1274.61	1650.84	4485.6	4320.46	1365.98	2720	6309.1	1732.17	7542.36	2128.02	6059.42	4866.88	841.764	1
P00491	Purine nucleoside phosphorylase	PNP	11	11	16408.9	7273.15	7811.15	9276.1	2776.32	18213.9	14741.5	7351.74	3761.03	6884.71		11160.9	6945.01	6096.89	9048.65	15224.5	15152.3	9600.63	27037.2	5314.62	19364	22661	5421.36	6174.37	12758.3	52170.4	21649.5	9150.65	23701.3	13547.4	29257.4	13898.2	6714.18	16310.2	17684	18287	7117.6	6538.58	9684.26	13612.6	14632	6929.32	5044.13	3906.95	4387.59
P00492	Hypoxanthine-guanine phosphoribosyltransferase	HPRT1	10	10	12661.2	7312.99	17023.6	14981.8	73497.1	23259.9	12763	6418.48	12602.6	21596.6	35809.1	27306.2	18713.7	9558.08	21512	11189.3	10132.5	20510	48288.6	6628.36	34990.3	11622.4	10852.2	17458.9	47473.8	29819.1	15303.2	9255.34	24823.7	25351.5	29443.2	10282.2	27841.4	31968.1	29896	9998.47	4591.26	5777.27	6553.62	11681.4	23541.4	38134.8	14349.2	48629	127779
P00505	Aspartate aminotransferase, mitochondrial	GOT2	15	15	9606.89	11028.6	20910.2	14291.7	37412	19476.5	9724.27	23237.3	27396.7	43218	532222	11629.4	15333.6	14146.1	12091.7	11508.7	26334	15060.6	14531	14776	176139	73030	26954.9	8404	37304.1	18989.9	19434.8	21523.6	18003.1	18581.9	16251.8	13432.5	11473.7	17163.4	42528.7	37561.8	16026.2	23520.2	32573.1	19131	28344.4	41361.3	13462	17269.8	45984.4
P00533	Epidermal growth factor receptor	EGFR	4	4	868.087	1162.52	901.34	410.646	17215.1		727.953	421.93	352.137	2996.96	23549.8	1657.75	140.233	363.598	184.012	1743.27	652.852	6126.39			8608.56	9372.55	129.34	3399.46	4245.16		1301.42			609.757			1079.73					495.367					3292.02	4720.75	3944.43
P00558	Phosphoglycerate kinase 1	PGK1	26	21	48413	42460	49185	46065.8	102844	77816.8	44022.3	39535.9	82751.8	85249.2	189007	31326.6	43219.8	58456.6	43129.6	43306.6	45668.8	34096	83201.4	50050.3	151461	70958.7	55792.5	60712.8	76219	126093	63534.4	33229.6	65821.7	72521.2	173350	41999.5	47447.1	79415.2	311061	159626	35316.5	36064.6	41423.7	92131.4	98084.3	157087	27946.9	58545	215796
P00568	Adenylate kinase isoenzyme 1	AK1	8	8	3877.97	4633.15	3193.19	3127.79	28502.8	2477.81	2401.56	3471.26	7922.6	51189.8	159792	5198.49	1494.27	11557.7	981.803	2445.93	2448.42	4479.51	160.089	1787.23	60131.4	24111.5	5554.72	5559.92	42303.8	191197	45207.2	9313.68	11861.7	17922	93965.7	10919.5	19791	10956.8	654576	540096	11167.2	57612	21220.4	80498	81249	580861	34401.3	66474.1	146969
P00734	Prothrombin	F2	9	9	10002.9	3761.5	2271.39	4969.25	5223.2	1070.16	2962.36	1789.15	6481.51	16046.9	15647.2	4012.42	1754.98	3987.98	1084.77	7179.46	3139.05	2057.15	803.248	2358.3		6422.76	2895.96	5384.34	2092.39	6777.94	9365.56	1250.11	254.804	79.9159	1693.61	626.145	1151.01	3208.53		19683.9	5477.28	572.082	1374.45	2125.2	10310.2	208.887	2003.6	857.838	1
P00736	Complement C1r subcomponent	C1R	2	2	2552.29	414.651		948.082			346.931	518.015				391.351	171.938	860.032		1138.53	131.231			376.998	1391.05	1289.89	452.069	265.733	1			574.925		758.903		117.621			757.879	1122.73	1396.72	98.2504	523.332	1	984.269	1	1290	171.377
P00738	Haptoglobin	HP	7	7	15766.6	1208.69	2482.79	5372	17225.4	3420.67	3807.47	2093.5	6433.26			8163.86	8208.73	2872.88	8325.22	10467.7	2850.91	13115.6		541.09	14105.5	1.44311	2069.17	9106.27	14917.8	9388.06	3354.83	2070.79	2632.46	8509.33	10608.9	5358.02	5431.77	5863.8	13419.7	10649.9	2389.38	1128.75	917.61	3999.71	24586.6	14556.5	14759.1	5718.34	3776.52
P00739	Haptoglobin-related protein	HPR	8	1	29546.8	3455	1828.96	4889.07	17720.3	6819.89	8117.09	6984.49	11118.9	17368.9	32844.5	13128.6	6220.29	2083.8	5520.09	14275.7	5205.92	14403.8	995.053	3195.61	36209.1	25104.6	13642.8	10221	13955	13872.4	1122.36	2962.69	3856.34	9746.06	13582.3	11537.1	6600.9	11562.7	23734.9	12630.9	3585.2	3221.21	2980.63	8980.9	76687.1	58217.7	24550.7	7727.1	16984.9
P00740	Coagulation factor IX	F9	1	1	10467.9	113.767	657.11	4728.11			1270.89	139.135	586.338			1868.29	854.38	2234.49	463.87	4480.15	481.565		778.349				270.116	2601.13
P00742	Coagulation factor X	F10	2	2	4887.59			4002.47			1014.79	249.369				251.447		386.402		1516.55	654.206							1071.74		5111.06	613.685	198.645								3174.94		318.463				4237.22		129.823
P00747	Plasminogen	PLG	10	9	55541.5	11777.3	3594.25	34499.4	7653.76	5797.92	4335.33	9361.06	16309.4	14475.8	236194	7881.12	9343.29	36378.9	10983.4	44516.4	15517	18985.1	18433.8	7069.13	25175	64565.6	14158.5	20649.6	7201.69	34925.8	7343.97	6752.85	7051.03	6158.39	18762.9	4173.92	2672.56	5466.94	18808	52785.1	11483.5	8015.62	5009.57	13891.1	33242.6	20870.4	5790.18	4205.39	11442.1
P00748	Coagulation factor XII	F12	2	2	8056.85	849.561	2133.82	3686.82	7732.8	2229.76	2356.97	942.174	3390.7	3081.88	9874.41	7275.03	2773.62	4066.6	3431.44	7589.04		17678.4		1443.55	16217.5		6879.27	3019.62		6292.23	3573.61	469.955	1958.66	2720.26	924.137	332.168	2635.81	2164.14			1865.2	1076.03	725.243	2935.55	10625.1		2819.35	964.622
P00751	Complement factor B	CFB	7	7	9021.17	2020.43	1271	4857.74	4854.52	2976.14	1582.38	2248.41	6747.2	4664.87	46.8071	5136.47	2307.19	2619.7	1739.25	5550.42	1172.62	2207.63	499.537	2389.89	30332.4	3967.78	5958.19	841.068	4120.3	6820.31	3196.65	1333.62	866.534	1768.26	3835.94	1560.84	2049.62	2073.05	11765.3	5694.27	3600.06	1821.64	2767.22	2897.61	9216.85	4328.62	2889.47	1894.87	2488.55
P00813	Adenosine deaminase	ADA	12	12	2581.59	5661.24	7632.93	4051.22	550.988	6302.94	8003.65	2908.56	4789.9	2225.39	6377.69	3273.16	7850.57	2682.41	7370.49	1886.92	4976.63	13979.6	7228.22	5645.04	1422.98	3451.62	11021.3	4924.51	3823.94	2275.47	8117.46	7213.95	17756	13625	19084.3	8314.58	5067.82	16757.8	6235.52	1921.95	5390.27	4327.7	10482.1	4214.79	2081.87	1321.43	1530.69	1416.68	5120.67
P00846	ATP synthase subunit a	MT-ATP6	1	1				394.548	1369.16			965.316		884.681		220.122		1572.96		558.166		560.548				4022.59					56.4272	661.259				195.079					1809.81	1104	282.653	428.589			1744.65		494.816
P00915	Carbonic anhydrase 1	CA1	12	12	32426.4	5547.08	3789.15	2921.64	15060.7	46686.6	14630.6	8827.42	17350.4	20738.7	33997.7	3570.47	2057.33	2718.38	1831.15	4900.8	17115.9	4855.26	7967.1	22558	54405.4	48494.5	7226.81	15913.3	17358	163571	30651.9	27250.2	8555.82	7265.29	129449	3834.55	4287.16	9815.97	45212.5	115762	15996.7	3840.15	3348.63	39229	64399.4	12639.6	4774.53	7200.76	27675.9
P00918	Carbonic anhydrase 2	CA2	10	10	14137.8	10752.9	9821.96	15304.5	27923	40253	9220.57	11188.5	24395.8	67292.5	212155	12827.1	6111.58	4366.85	8833.41	11172.6	12453.1	37115	4761.74	11842.9	76549.1	81838.6	15972.6	14156.7	41104.3	99850	13976.6	10249.1	8303.27	7051.89	46166.5	1070.32	29896.1	21380.6	33500.8	31601.5	6766.44	6719.83	4386	36278.2	98908.4	43780.3	26437.2	40757.9	70118.1
P00973	2'-5'-oligoadenylate synthase 1	OAS1	5	5	1427.43	847.996		1		889.184	1342.32	35.3814				95.5868	406.188		105.867	1957.15	1609.97	349.613		274.244	1.3664		137.138	224.068			331.625	212.345		1087.66			1	362.161	1		1459.56	1696.91	421.86	1		1.03495	73.2419
P01008	Antithrombin-III	SERPINC1	12	12	44813.5	5224.89	7319.1	16445.5	23998.5	9488.66	21678.1	5867.23	17814.6	18853.9	110691	18941.9	6626.38	11249	6017.93	19248.3	5336.25	7670.21	11221.9	2353.08	48014.9	30390.3	14806.4	23548.4	49114.9	40099.9	18788.7	6885.3	16194.2	20337.2	34705.9	12299.6	13662.8	11892.4	78373.4	60205.3	6723.18	5328.38	7011.58	13637.1	21737.3	19914.7	10314	8508.1	21072.5
P01009	Alpha-1-antitrypsin	SERPINA1	15	14	93601.9	5458.02	3851.58	4399.5	8949.94	6242.97	8110.35	7632.42	7905.48	16139.8	74620.9	13673.9	5126.51	4827.56	5879.07	6838.98	3299.01	8586.4	10387.2	2761.41	21839	18029.8	9278.98	16519.9	22040.9	8705.68	6058.69	4509.15	10242.4	10569.7	40175.4	10922.8	10117.6	8627.74	53751	25179.7	4968.58	4742.69	8501.78	15667.7	26156.2	18630.4	9393.69	9449.51	16684.8
P01011	Alpha-1-antichymotrypsin	SERPINA3	15	15	149310	8949.74	12717.7	10946.7	17244.7	38278.5	20899.3	13822.8	14216.9	53832.6	463505	22608	8168.45	11627	11020.9	23203.1	9733.76	14522.4	8480.37	10054.4	103329	56472.8	15270.1	37956.9	51426	28716.9	15018	10020.2	31594.3	32773.1	86689	18815.9	18789.3	19118.4	38717.5	25340.8	13601.6	8939.46	25033.3	30569.2	41389.1	210704	26408.6	16419.1	35095.8
P01019	Angiotensinogen	AGT	5	5	9678.7	1027.31	1612.11	2019.97	8946.62	1889.98	3134.1	1443.48	3917.18	6463.02		4679.62	2615.2	463.738	5627.42	4274.61	1501.54	4477.08	3298.47			939.142	1936.85	4295.24	8676.82	10464.7	1893.45	2901.15	3020.2	7064.96	15268.2	3927.79	4254.1	3252.87			1682.86	1289.95	4719.96	2171.02	14431.5		2821.47	6594.49	6243.79
P01023	Alpha-2-macroglobulin	A2M	25	22	13885.5	1796.12	2884.52	3427.29	12445.1	3049.32	6722.78	4107.9	2438.96	9381.65	20875	9857.27	2983.35	7513.68	3010.53	17114.3	2034.87	8458.59	6970.21	1658.13	26522.4	12934.3	2752.46	7724.23	9236.21	20569.3	4743.01	3263.91	4985.35	5450.66	11727.6	3763.34	4449.51	4788.01	50827.9	31056.7	2146.34	5177.23	2612.98	9743.77	27836.2	27945.8	13252.5	4264.79	6596.15
P01024	Complement C3	C3	44	44	23299.5	3206.48	2794.1	8360.3	8579.35	5892.77	4421.94	8076.2	10521.7	13530.1	22417.1	5639.74	2775.19	6200.24	3597.57	16566.2	4156.08	7636.04	8743.07	2821.41	43032.9	32209.4	5358.55	5261.64	14056.7	29977.5	7898.72	4447.59	8201.48	10965.7	34377.2	5416.91	9113.59	14412.9	38436.3	29653.9	9121.55	5967.7	6845.04	18567.5	52540.3	25477.8	17249.5	8199.29	11364.5
P01031	Complement C5	C5	8	8	3394.47	548.638	123.981	1084.14	593.448		1066.89	2261.07	4063.25			1995.02	148.85	692.779		2186.75	462.556		366.565		2.47447		504.913	492.722	794.058	2600.45	121.307	582.007	258.685			749.898	324.091	1320.36	2108.33	3847.45	1147.55		861.758	1369.07	4564.77	2197.99	1318.68	911.653
P01033	Metalloproteinase inhibitor 1	TIMP1	4	4	23270.1	6695.51	9298.37	18665.2	5150.43	7519.76	2563.93	31197.1	54963.3			6211.45	17970.2	27793.5	6117.74	17742.9	2928.65	5749.93	4298.01	17860	28346	23773.2	9230.98	9150.1	5345.31		10520.4	10682.5	11829.4	6835.73	33260.3	19621.4	2784.11	7143.11	3558.82	11914.9	4334.55	3368.64	5519.04	9745.32	20935.5	7231.17	3339.28	3617.23	5771.84
P01034	Cystatin-C	CST3	4	4	4646.91	1837.5	2034.73	2625.35	17929.9	1238.34	5935.14	1821.26	2387.98	23062.9	46073.9	5946.46	2757.06	1412.83	950.901	5050.98	1177.77	147110	1518.53	2170.09	5000.35	11515.1	5739.03	6604.12	8192.67	2592.57	1575.15	1729.22	1444.62	5096.85	12618.8	1168.88	3201.81	1173.21	5669.06	1751.66	1824.59	2530.4	2076.15	5233.97	8348.57	3429.81	7129.54	12829.2	35059.7
P01036	Cystatin-S	CST4	1	1		450.098		397.967				727.186		1332.16	8873.72							108.608				10740.8			832.065											13030	113.734	207.136		1079.87	1720.16	5172.91	162.671	247.647
P01037	Cystatin-SN	CST1	3	2		1381.89		335.067				1354.88		4466.43	39916.8			1524.72						1349.4		64624.1		1513.31	5669		1607.66	953.049				1950.2		595.804	20143	27320.6	1784.17	3116.52	955.33	5191.94	5368.08	11665	1304.98	4165.52
P01040	Cystatin-A	CSTA	9	9	4844.72	4467.84	4502.69	1671.03	1096.96		1968.8	11891	4079.67	24804	901650	1080.73	1501.65	2210.5	273.395	2068.6		689.571	3470.33	6289.11	36824.2	369240	6283.3	2785.6	15947.3	11187.4	24063.6	2172.08	9244.75	10229.3	49545.3	9720.29	4539.96	7051.05	133484	209904	10610.8	31855.8	9732.08	38682.6	47465.2	237894	7703.14	15174.5	61005.2
P01042	Kininogen-1	KNG1	7	7	47103.7	7171.02	8398.61	18740	32568	20990	30069.5	11397	15837.6	27140	102807	27015.5	9502.2	15487.2	16336.4	20917.7	5743.02	22430.3	9149.51	4681.63	123233	51460.3	15043.9	24668.5	20727.9	20136.4	9852.41	6438.74	17484.4	13427.7	48949.5	10068.5	11128.5	13764.6	48370.3	26013.3	8561.03	8117.85	11156.7	16310.2	64675.5	30977.8	14490.9	9689.74	26057.9
P01111	GTPase NRas	NRAS	8	1	6344.35	7525.78	9169.63	5811.23	60254.1	10537.9	7847.11	4817.05	14642.3	13964.5	41383.9	5163.65	5837.73	5521.57	3884.23	6479.13	5030.22	9226.73	12210.9	6974.8	47469	8410.24	5847.37	6603	24655.8	27084.9	11019.7	7369.87	11675.4	12709.5	9771.67	7990.56	13943.9	8752.93	22948.3	6597.86	5267.72	6425.42	7546.8	9429	16323.5	16451.7	14747.1	46941.1	128946
P01112	GTPase HRas	HRAS	1	1		7221.22	10005.8	2053.84	87039.7	2774.38	4103.3	2968.85	7938.82	19105.9	26193.6	10654.5	2882.73		5214.76	5629.75	3838.35	14817.8	5230.06	4258.62	64333.1	6626.08	2997.76	10041.9	19197.8	6108.66	5812.17	7169.46	1783.39	2897.61	4793.39	1639.96	20622	2173.97				2360.64	4600.26		5222.86	2515.11	18337.6	70538.6	131354
P01116	GTPase KRas	KRAS	2	2		701.517	196.102		8296.82		470.213					157.163						85.8912							2106.65							1446.14	707.334				252.472	174.979	465.208	441.432	693.997		1798.8	5596.47	42087.3
P01133	Pro-epidermal growth factor	EGF	1	1	2344.78	319.604	559.596	357.726	390.041	491.698	501.496	1				206.565	46.7101	1185.88	290.414	131.094	81.6172					6.99182	208.616				1	285.317	633.286			314.634	219.177	212.252			130.128		320.885	1484.31		6.2641	781.273
P01137	Transforming growth factor beta-1 proprotein	TGFB1	2	2	7546.47	1042.07	3378.84	5420.86	1401.31	7851.41	3305.39	1983.29	6931.85	4908.14		5330.4	7135.45	3630.99	4344.29	3941.91	2940.75	6303.72	8176.68	3831.21			3465.24	5702.35	4751.86	9758.01	13228.2	4026.27	8871.77	10641.2		3375.79	1782.62	2229.07			1978.35	438.039	1508.73	2821.93
P01213	Proenkephalin-B	PDYN	1	1	1211.92		5953.24	245.799	50890.4	104.092						7637.99	513.05	406.484		371.043					80071		215.788	11959.1	27520.7			4101.06						5081.15					173.245				1300.82	17586.4	41069.2
P01266	Thyroglobulin	TG	26	26			110.601	400.483	842.795	1375.74		844.129		2958.05			3837.36		863.677	263.636	423.381	8349.76				95241	1			654.907						2630.5				18530.4	235.922	135.279		1
P01591	Immunoglobulin J chain	JCHAIN	6	6	332750	10765.5	8048.92	12764.7	37576.7	42218.7	44818.3	25700.4	84691.8	82078.4	819098	24015.4	12933.7	17575.2	18048.7	37161.8	13359.6	537.151	112831	4390.91	141991	240612	100507	42029.6	156874	97426.2	90784.1	94004.1	46609.6	35021.3	327737	80793.4	21652.5	143262	161130	189336	52570.8	22774.8	38668.6	75370.9	133619	162883	22048.7	49649.4	187491
P01593	Immunoglobulin kappa variable 1D-33	IGKV1D-33	2	0	2390.78	1129.85	6398.44	1179.77	2129.56	4002.09	576.639	3888.54	11355.7	3977.09		1587.36	2071.64	2649.06	3592.62	3442.18	1291.58	2442.34	4437.94	905.956	1183.07		3104.64	1006.32	3874.05	28711.3	3542.81	862.598	833.731	1727.71	2984.28	3914.7	3918.98	1280.32	2444.71	2454.93	432.628	1295.04	683.469	554.437	968.188	1875.79	2847.37	2124.61	2332.43
P01619	Immunoglobulin kappa variable 3-20	IGKV3-20	3	1	111675	20254.7	14667	24830.4	38841.7	34483.8	23979.6	15450.7	15502.5	66920.8	371083	42405.9	21556.7	22633.5	27644.2	46648.9	13285.4	87527.8	26830.1	16947.5	115967	132250	8706.55	24043.7	59238.1	98920.4	41662.7	13373	24052.3	44589.8	225916	38141.8	23435.5	19566.4	170188	112111	26046	43824.2	55380.4	47070.5	60269.2	132139	31383.9	53591.8	111806
P01700	Immunoglobulin lambda variable 1-47	IGLV1-47	1	1	17979.3	7557.35	2787.73	5528.74	22704	7189.14	16298.3	5797.2	15660.6	22756.6	62930.1	13282.6	3708.69	7945.63	3629.4	41603.2	2295.82	12689.4	6336.26		36719	21914.6	12125.9	11099.8	20319	10933.8	2966.04	2645	5994	12040	22542.1	7620.2	7108.3	7696.65	6930.85		5750.31	3942.88	5816.95	6718.68	42295.1	8646.64	8224.54	8779.31	24039
P01701	Immunoglobulin lambda variable 1-51	IGLV1-51	1	1		165.579						493.388														924.159		926.929	2911.43		1638.67			452.751	9249.21	1533.45	1587.39				1949.26		453.065	1696.21	2046.39	2007.32	1523.56	4493.33	9116.85
P01717	Immunoglobulin lambda variable 3-25	IGLV3-25	1	0		1194.73								18547.6																														3432.7		1082.06
P01721	Immunoglobulin lambda variable 6-57	IGLV6-57	1	1				575.55	994.101		731.853		891.016			1982.85		575.17	161.807	1675.19	284.936	13938	1440.95					1091.38							2725.87		1006.86	669.023									1364.74	253.818
P01732	T-cell surface glycoprotein CD8 alpha chain	CD8A	3	3	264.284	379.567					113.27	1				377.055	92.399			101.895		1383.68	225.296	1027.21			284.482	1844.99					1	528.954	1.02401		100.368					13.2735		1
P01742	Immunoglobulin heavy variable 1-69	IGHV1-69	1	1						776.803	1549.94					147.185																	1
P01780	Immunoglobulin heavy variable 3-7	IGHV3-7	1	1	10052.4	828.987	292.099	2351.88	9383.95		3687.96	779.301	1753.54			4209.15	1154.7	3565.8	2176.24	7743.56		2103.91						2704.83	521.683			314.862				2268.48	1134.73				1204.02				4435.52		1793.69	6236.43	2188.73
P01833	Polymeric immunoglobulin receptor	PIGR	11	11	3625.43	3586.76	4621.25	690.046	4255.41	9329.24	1629.77	2454.13	3441.68	33929	62071	1719.41	2202.92	5877.1	2460	9.83041	2977.67		20322.6	3375.02	11632.1	86576.3	1760.33	2617.66	65686.5	3541.36	5351.71	4509.26	6708.49	4382.34	19343	3506.82	4914.44	2198.81	32664.8	86471.1	4359.76	25259.7	7235.8	8977.97	7413.95	98063.9	12355.6	72010.8	205528
P01834	Immunoglobulin kappa constant	IGKC	6	6	27692.4	4415.62	3222.41	3027.47	7944.63	1912.15	4040.48	13958.7	5817.95	64324.8	198144	8417.85	1257.55	2190.82	2230	13007.6	5527.28	13827.7	36733.8	17042.6	235884	110711	9690.94	25593.4	38195.8	12164.8	12958.1	4777.66	12646.4	11025.7	82377.2	27808.1	6845.94	10787.4	191466	110988	18878.4	11440.9	23936.3	31154.5	35989.8	130881	8196.08	15725.2	46259.7
P01857	Immunoglobulin heavy constant gamma 1	IGHG1	12	5	77262.6	11924.7	6803.73	20198	50420.5	16051	27432.6	32841.6	32737.9	55601.6	258170	26227.6	9960.64	16549.9	13728.6	60560.9	8032.44	185238	15923.2	6761.76	168944	77078.8	16496.2	24570.1	20672.3	39501.5	17412.1	8618.33	13929	20398.5	49870.4	11427.8	28420.2	21195.1	65208.7	44756.1	20399.1	20116.9	15718.9	17980.1	63400.1	261128	45289.1	30436.9	47001.4
P01859	Immunoglobulin heavy constant gamma 2	IGHG2	5	3	8367.68	7961.52	4213.92	2733.33	6978.05	646.06	5730.34	1774.94	1067.03	5945.68		4304.32	1446.03	4412.66	5152.08	11224.3	774.505	4174.75	2744.68	6406.3	4127.04	2.71192	1273.34	4829.46	1712.3	3809.46	1501.9	451.002	2379.44	3191.86	4244.64	2558.03	5552.74	3131.64	7050.23	3.23785	2631.67	4084.71	2663.76	5284.55	15849.3	8813.82	13321.2	3455.74	14606.3
P01861	Immunoglobulin heavy constant gamma 4	IGHG4	1	1	2134.85	3722.72		1639.76			4096.52	676.188	824.802	2448.38		2451.48	1248.46		596.744										2311.92			5172.72		1104.64	11626.2	778.069					1407.47		4195.3	1781.25	7854.93	725.707	8977.01	2860.81
P01871	Immunoglobulin heavy constant mu	IGHM	15	15	199557	5969.88	7640.87	17949.6	12880.4	13642.3	16616.9	21593.8	27809	6682.15	54458.3	6501.5	11801.1	28679.9	26199.8	15753	9064.1	6240.97	28555.1	4004.57	13133.2	67769.5	23887.8	23373.7	6809.79	22404	30241.5	58224.6	25389.2	7480.49	12748.7	51863	7615.93	18733.1	31036.3	7771.53	65151.8	13253.4	79916.3	21901	16178.8	195888	5128.77	7334.94	16746.4
P01876	Immunoglobulin heavy constant alpha 1	IGHA1	4	4	88135.8	19418.3	2916.16	34557.6	47798	37217.9	16229.4	14437.6	73321.7	99264.3	120321	30672	9498.03	14903.5	24106.8	34346	6476.2	39181.9	43469.6	2922.62	132808	107324	10082.3	24209.3	47983.5	15006.1	9313.64	19225	17876.8	23678.5	21671.3	12100.1	11585.8	34663.7	47475.6	80349	6866.98	24333.8	10454.3	26881.8	28053.6	103222	16260.4	72082	82596.4
P01877	Immunoglobulin heavy constant alpha 2	IGHA2	4	1	43599.2	19735.3	5201.6	17112.6	47707.3	11859.1	14371.4	14324	24305.6	97001.7	445659	50056.9	12183.3	43555.9	15822.1	37706.6	7113.12	66341.7	13061.6	10692.5	154371	88370.7	21169.1	23471.4	73960.6	5054.47	7040.9	6326.69	11160.7	7460.89	6001.44	8148.72	4975.7	13165.6	53191.6	45872.2	4245.39	8091.03	9294.04	17542.8	25152.9	48894.3	17982.5	61561.8	71498.7
P01880	Immunoglobulin heavy constant delta	IGHD	2	2	4592.78			2443.89								1318.97	4675.84	6920.87	3122.87	957.026				276.041						6825.41		3629.28	3931.94			1835.25		229.58			1436.41						2266.09
P01889	HLA class I histocompatibility antigen, B alpha chain	HLA-B	7	5	11809.7	11493	3616.51	3240.64	2151.59	9296.64	18648.9	5189.21	13078.1	30545.1	843805	7080.97	15045.3	2370.48	7347.95	5876.4	5776.65	88881.6	10105	4429.57	56404.2	25969.9	10832.1	18775.6	6674.67	1431.98	479.788	9786.56	1302.91	2764.04	23463.7	2754.22	5867.73	680.896		1.39305	3513.32	5030.13	751.865	18466.6	2134.23	18524.1	5067.34	1236.84	5051.86
P01893	Putative HLA class I histocompatibility antigen, alpha chain H	HLA-H	7	1	90742.7	25574.9	19289.4	16605	19218.8	38522.2	23335.2	13677.5	29717.2	67867.6	154186	8562.5	62599.1	27445.7	32744.8	15904.7	14139.6	82856.8	29126.1	51320.6	210797	94284.1	31975.5	33409.5	23800	15900.8	7938.29	13565.9	22884.4	26671	31713.8	15886.6	7521.32	9066.81	39253.2	17333.5	7258.61	22896.3	10193.6	35257	12062.1	51406.8	15970.4	5126.89	18222.9
P01903	HLA class II histocompatibility antigen, DR alpha chain	HLA-DRA	7	6	48614.6	10362.9	14585.5	15454.6	1357.56	4774.83	21551.2	13392.8	10884.2	17918.8	647355	4742.07	34605	55860.4	46902.6	10286.8	19384.9	20534.4	9548.3	16653.9	29393.4	61664.9	11494.9	14160	7207.79	8969.81	23917.9	18571.5	75838.9	26102.4	31669	45838.7	10589.2	30262.6	34257.5	14991.7	1943.75	33618.7	21775	16922.8	15021.9	19523.9	3439.77	6565.8	14336.4
P01909	HLA class II histocompatibility antigen, DQ alpha 1 chain	HLA-DQA1	2	2		935.414	1830.61	823.75				911.207	4303.35		23403.6	1473.24	9069.32	4598.55	3551.64		301.251	386.493	688.321	3159.48			3720.05	141.154	1430.39		372.709	590.107	40536	7320.03	1.02987			5616.61			257.432	6819.33		381.851	1657.63	354.587
P01911	HLA class II histocompatibility antigen, DRB1 beta chain	HLA-DRB1	10	4	109727	10165.7	26222.6	43308.6	4125.51	23635	49611.6	16100.2	25430.2	33999.2	560666	16689.3	59241.2	161680	123341	33113.1	47177	22871.1	47526.1	32978.1	44225.8	104821	76543	49070.3	127379	34660.8	101222	46088.9	573178	76789.3	117976	99129	22467.6	65976.6	102850	117257	27005	67462.2	63519.3	73846.9	42052.5	168448	8636.24	12455.5	21617
P01920	HLA class II histocompatibility antigen, DQ beta 1 chain	HLA-DQB1	6	6	46106.6	1610.59	4424.1	11164.9		1620.07	3863.9	1624.27	1990.14	542.171	11178.8	4189.18	13933.1	10504.4	16587.4	3273.15	13976.2	22769.5	1305.93	1948.55	1576.05	12299.1	16072.4	4478.85	7953.55	6288.1	27418.6	4887.65	36066.9	19363.4	4042.72	24446.7	3807.39	20783.7	3288.49	3826.31	1790.63	25620.9	15616.5	5358.52	2854.99	2264.06	2281.08	1926.05	2996.45
P02008	Hemoglobin subunit zeta	HBZ	4	4	1868.75					1560.62												240.872								30902.6											1818.83		1		695.056
P02042	Hemoglobin subunit delta	HBD	12	12	331549	20152.5	30322.1	27274	119054	478420	99078.8	25893.3	40765.5	76410.6	319618	24506	15449.1	17734.2	17452.1	39352.2	76150.7	256030	29429.7	64920.6	75731.6	142910	22588.3	80748	75598.4	1.56825e+06	227728	126990	46861.7	12360.9	1.09649e+06	8430.97	8071.05	95140.7	302465	530465	128188	15226.6	11253	208076	343656	90265.2	31398.6	53924.9	164153
P02100	Hemoglobin subunit epsilon	HBE1	4	4	366276	86385.4	66579.4	39259.3	214813	1.06423e+06	109156	79481.3	95591.3	47885.4	87.3608	22821.9	19435.2	33725	19448	36632.6	99098.4	96317.3	48277.5	92690.5	2729.88	149125	12300.8	111292	155772	3.01318e+06	399350	266447	106413	35544.4	1.98145e+06	17559	31498.8	180272	571480	352431	146661	49800.1	37362.9	350366	641009	91788.9	104922	234613	436122
P02144	Myoglobin	MB	3	3												1	1	1490.99											1090.22	5011.49	6897.44	83.7095					525.004	190.907	22154.5	41874.3	1	814.583	810.718	3738.88	1814.72	9067.42	1934.88	716.874	1275.19
P02452	Collagen alpha-1(I) chain	COL1A1	18	17	7612.91	2109.99	1657.47	2661.76	1566.5	1611.7	13697.9	12397.3	19433.9	1231.19	4141.85	6728.78	5363.72	4072.67	641.106	8993.08	194.349	37620.2	3534.82	2032.7	13648.7	44655.4	5812.94	8260.63	18902.6	19664.9	9688.02	2018.63	12514.5	6080.34	15477.9	2501.63	302.958	3851.07	47120	14357	235.121	2613.58	1068.5	4845.84	1740.99	3420.74	607.687	3278.6	6758.88
P02461	Collagen alpha-1(III) chain	COL3A1	4	4	389.299							689.442						85.1004				1106.88	184.347					415.248	4038.06	5774.65		1291.83					1415.06	2747.49	3.12344			223.003	348.569	1			2088.95		4719.13
P02462	Collagen alpha-1(IV) chain	COL4A1	1	1	1965.7		446.176	678.964			3465.12	6069.14	3276.3			2036.84	608.985	5139.55										4707.68				631.151								8631.99		987.61
P02511	Alpha-crystallin B chain	CRYAB	18	18	83207.2	88826.4	69412.8	95844.4	109962	33836.2	84329.8	45839	111311	830927	2.05175e+06	213906	52808	43847.2	60759	114946	61538.9	188799	16434.6	13923.6	180051	483090	63831	97828.2	204566	111568	351249	43745	86592.4	129078	655778	33936.1	269217	63630.4	448023	202703	55942.3	54158.6	79147.4	202777	384040	771236	260030	466536	670130
P02533	Keratin, type I cytoskeletal 14	KRT14	24	9	49289.1	48122.8	40906.3	13053.9	64774.8	11660	11924.4	51141.3	18290.2	205603	4.60107e+06	12537.7	7130.22	20239.3	7648.79	11146.6	5004.13	34710.6	5163.65	51932.4	192380	2.46009e+06	39857.9	25607.5	102133	70218.1	71501.5	17063.3	47573.4	29408.2	168474	57247.8	26505.3	27447.7	646479	1.09705e+06	33065.6	159821	36278.9	115852	259749	946020	26379.1	97561.7	357328
P02538	Keratin, type II cytoskeletal 6A	KRT6A	25	2	26854.8	33109.8	19040.1	7162.46	29973	13723.9	6344.84	23307.9	14200.3	145903	1.98493e+06	5179.87	4737.57	11308.3	6378.05	5108	5221.56	6234.89	3630.02	37790.4	253026	1.3195e+06	66029	12435.6	99845.7	51516.8	34168.2	9921.11	18623.6	16270.8	59771.5	25516	20611.7	20398.4	385773	643084	20978.7	123702	17666.2	75494.8	146735	411112	13873.5	48428.5	133709
P02545	Prelamin-A/C	LMNA	26	26	12466.2	6356.08	10197.6	7723.46	9305.65	6463.13	9954.63	16440.1	20310.6	28702.2	96221.5	6808.71	7394.28	10513.5	5207.2	11694.2	5086.24	15463.9	17795.4	11991.1	27651	62349.6	13626.5	17744.1	15726.1	55311	13395.5	9053	9110.54	10585.3	38067.9	6405.72	4118.3	4248.5	112014	66950.9	7008.24	24221	8512.82	28144.7	28297.8	103035	11643	10291.3	20593.2
P02549	Spectrin alpha chain, erythrocytic 1	SPTA1	66	66	4202.19	1624.79	1981.19	3836.62	4254.54	6845.39	2142.89	1286.97	8403.36	6807.16		665.55	888.715	1585.11	1644.14	2008.24	4045.67	6717.57	1662.72	2537.17	2476.04	16358.3	6652.35	1429.42	6071.21	64207.9	6091.35	3514.83	3118.42	988.951	5191.06	629.139	1461.98	1751.13	7607.37	19556.5	7227.82	1316.65	4299.29	18846.5	5871.11		922.776	1686.91	4109.17
P02585	Troponin C, skeletal muscle	TNNC2	5	5		1	50.2606	1		284.346	462.632	1				132.537	84.9788	2973.81		101.611	1			1.06014				572.923	13347.9	65707.9	20673.6	1133.77	8775.84	11893.4	69636.2	3484.04	4421.9	7274.11	317142	142257	4615.88	19792.2	8579.22	47791.4	15239.7	523181	13267	16694.5	43293.1
P02647	Apolipoprotein A-I	APOA1	19	19	103203	13758.8	17545.3	13693.4	74306.3	29541.8	26112.6	18851.2	61130.1	49467.6	196195	30350.8	17362.2	19029.8	29386.3	26973.9	11008.9	17092.3	44216.1	20662.5	225928	142439	27121.7	48314.2	86972.9	60577.2	28234.3	13862.7	20941.1	21872.5	148438	26094.5	29998.2	28636.5	116273	51739.7	14823.8	17820.8	23032.8	28734.9	102881	91827.1	30641.5	30530.6	85405.8
P02649	Apolipoprotein E	APOE	15	15	13436.9	4742.05	7183.43	6187.93	11130.9	4612.58	17268.2	6221.59	18434.9	14221.6	166313	7734.43	5856.53	3818.85	6338.02	9811.07	3487.48	82680.3	11596.8	15829.6	26008.6	9630.76	8991.33	112754	4924.04	13457.6	2289.95	2886.08	5842.94	7110.78	17322.5	5627.81	4144.33	2062	15651.6	9761.3	2317.09	2242.47	2967.36	11868.7	8165.01	13312.2	4627.8	6251.96	12174.1
P02652	Apolipoprotein A-II	APOA2	3	3	57551.3	4976.18	5713.06	5186.87	25133.9	5647.07	7600.41	5132.07	18435.1	17185.7	150792	14076.2	5704.7	3973.81	5598.93	8624.52	1394.54	189.955	15370.8	3426.2	73920.9	16405.3	4027	11751	11404	10603.8	7284.57	1946.84	3145.58	13029.9	77465.9	13868.1	12281.3	18159.9	38460	15450.4	2200.34	2446.41	2718.22	7420.47	65215.7	46943.8	12727	16023.7	34971.8
P02654	Apolipoprotein C-I	APOC1	1	1	121719	10451.2	10052.7	23576	24597.3	9718.46	10491.4	7413.41	26204.3	7353.54		36631.8	15730.2	15359.9	24875.4	18865.5	14889	8317.28	10399.6	7963.97	25982.9	19747.5	8949.51	29856.7	9236.64	3058.94	6397.74	5132.55	719.416	3077.23	850.556	6673.22	7672.1	6751.28	532.381		1378.02	335.815	734.197	9649.42	17927	1094.46	12293.1	18770	32443.2
P02655	Apolipoprotein C-II	APOC2	2	2	5684.27	1901.28	712.723	1985.66	2588.07	571.883	969.869		2215.28			9547.33	1821.14	1574.49	3516.96	1578.05	736.353		2715.77	2903.46			811.019	5989.47	6841.48	7081.25	5502.97	2854.38	12671.6	8858.63	34029.4	6015.82	4340.74	8452.81	5782.65		2195.82	254.315	687.426	2838.62	1992.86		1932.7	2795.32	35977.5
P02656	Apolipoprotein C-III	APOC3	4	4	11405.1	3370.61	6142.95	10049.8	15175.2	4699.66	2006.6	3609.9	31093.9	3242.98	15187.5	21297	7036.68	5370.02	15090.1	10996.7	4137.35	41450.4	11945.7	2050.04	13808.1	19173.4	3339.47	17481	15615.2	6077.4	14127.8	4845.79	4154.29	12536.1	22112.1	6825.33	5605.41	12138.4	11722.9	8099.89	9208.47	836.753	8009.77	2507.1	17481.9	2868.27	5968.96	15834.7	47029.4
P02671	Fibrinogen alpha chain	FGA	33	33	172235	73385.7	7988.23	48445.1	30824.2	46456.1	11946.4	20953.7	14115.4	119049	243107	14645.9	42571.7	119561	20789	75076.3	48375.4	14834.1	13698.5	40763.4	168813	318285	77955.4	124990	35017.9	95433.6	29116.9	25297.6	24465.8	7523.51	85225.8	16598.2	7858.71	23772.6	57228.9	317887	54840.1	13544.5	17244.3	124952	133147	69276.2	10640.2	13357.6	32573.3
P02675	Fibrinogen beta chain	FGB	22	22	309306	79763	10270.4	68739.4	32328.7	34249.7	9568.99	16804.8	62791.9	107256	502803	15562.1	35342.1	155456	35644.3	82844.4	59644.5	7925.56	11800.9	35955.3	256360	428566	141372	176132	23137.9	53597.9	36633.9	19802.2	13391.1	3613.01	53041.5	6861.29	4222.32	9549.67	62501.5	241093	36904.7	8104.04	5230.04	74964.5	62744	223206	5202.57	7910.64	24212.4
P02679	Fibrinogen gamma chain	FGG	15	15	197942	62129.2	6877.43	61081.9	32538.8	31589.5	8966.53	26008.5	22289.9	103325	130389	11698.5	33988.8	79633.9	25387.7	91606.4	41349.4	16719.4	4213.62	38147.7	87098.5	430543	97766.9	67889.3	29012.8	245508	34923.1	67343.8	23714.3	11697.6	39646.4	11059.8	8151.64	25881.4	72450.5	275198	77987.4	22075	13684.6	134991	139667	131203	16030.2	11604.6	26160.8
P02686	Myelin basic protein	MBP	12	12	114109	1.22722e+06	93400.1	289461	418284	54501.8	19353.9	223048	654608	8.59579e+06	1.28033e+07	27149	126061	38011.4	235876	221993	279260	313373	54713.9	117712	1.20573e+06	4.78722e+06	162426	195698	391453	1.59363e+06	120334	76300	99523.5	62531.9	334202	27448.5	2.04198e+06	145654	512279	305047	426681	41502.3	519273	800870	4.97796e+06	2.29382e+06	2.80835e+06	6.67225e+06	1.27381e+07
P02689	Myelin P2 protein	PMP2	5	4	551.09	14161.2		1822.65	3396.63	80.3259	1	2380.25	1456.69	121956	255985	984.311	200.43	2329.01	547.778	1215.97	2013.46	7036.12		3175.42	909.215	100912	878.437	411.059	3128.05	22123.3	6034.66	734.198	161.56	3039.44	7428.17	520.639	23560.1	3145.64	47963	26641.4	4445.99	4907.57	5196.26	13284.4	84152.5	65051.3	31952.1	42058.1	28090.6
P02724	Glycophorin-A	GYPA	2	2	1301.21	411.807			28.1174			44.3431		899.596									1						1	11021.5		275.877			11655.2					42749.9	1364.22	1		20707.2	8533.63	1.10291	149.298	1	840.536
P02730	Band 3 anion transport protein	SLC4A1	23	23	71014.3	14828.5	10387.1	22852.2	36865.2	89279.3	22779.9	8882.51	13450.4	63979.6	116843	6808.36	5433.67	13457.3	6135.61	8185.76	24941.1	21357.8	10161.8	9868.29	21368.1	76092.5	29874.7	16130.9	77896.4	712282	82721.5	31594.9	14507.4	17585.9	59246.2	8332.31	15160.7	28037.9	61961	258508	68020.5	5845.19	38940.3	147146	60614.6	6275.12	6203.54	14838.4	49377.9
P02743	Serum amyloid P-component	APCS	6	6	169712	17828.2	2538.9	80453.7	7320.32	4343.83	12837.3	23778.7	25501.2	6887.54		10734.9	5804.29	10601.4	23104.4	47110.7	19027.7	11635.8	1815.34	5706.14	110862	89811.7	7045.57	7787.19	22547.1	37719.2	7627.76	2600.72	7986.66	7196.18	48247.1	7736.93	4233.52	11296.2	19242.4	57987.2	11164.5	1684.54	5648.37	66141	108445	205159	18207.1	5421	14101.6
P02745	Complement C1q subcomponent subunit A	C1QA	2	2	377.107			123.689		150.146	1052.04	389.246				570.695	121.162	1324.56		889.06	2332.64	717.78	557.885	2100.45	1152.29	355.983	1356.14	4232.59	241.686			237.134	195.334	2011.97	1861.03		120.558		1854.62		139.661	65.7457		736.23	338.073		128.399		453.24
P02746	Complement C1q subcomponent subunit B	C1QB	5	5	10341.3	3384.22		1604.98	7961.73	5827.97	9168.32	4326.58		7386.28	15.5008	4371.09	443.044	3167.42	1359.17	3794.28	1659.59	66946.2	2991.89	4128.75	26820.8	3340.47	5243.63	7729.48	3702.28	5681.8	2445.49	4438.2	6275.23	22286.2	18991.2	1881.08	5705.48	4663.25	22762.8	6767.88	4921.55	5744.87	1734.75	14477.1	13035.6	49045	6388.76	7252.59	7121.98
P02747	Complement C1q subcomponent subunit C	C1QC	4	4	37106.3	6630.17	2351.4	11482.1	30790.9	9779.17	33771.6	14904.5	20352.5	26386.6		14831.4	6603.27	25876.5	7228.5	32106.7	5164.43	39840.7	10571.3	15385.8	46763.5	27534	54725.5	28140.5	9514.23	9629.67	8548.84	10433.9	19534.9	56063.4	80202.8	1487.66	7661.91	3477.97	81622.6	13947.2	7482.53	14778.8	589.942	13902.7	30121.5	16601	8274.5	7018.59	402.099
P02748	Complement component C9	C9	6	6	17030.5	582.164	749.267	1255.21	1303.39		1863.37	1406.18	3297.22	4852.95		1641.07	660.681	1006.99	978.524	5192.59	975.877	173.876			12881.9	962.427	1828.2	4326.5	3050.44		1945.87	912.831	3903.23	2320.14	12163.7	1713.85	842.465	1119.68	3476.35	6927.33	787.032	444.854	1009.81	1491.49	5374.28	2337.22	1699.24	1026.35
P02749	Beta-2-glycoprotein 1	APOH	2	2	5494.62	2013.53	2753.33	3127.22	5860.92		1493.66	1309.54	5660.41	3147.1		2380.05	1477.96	1783.89	3210.75	2772.87	3447.9	3070.09		1005.58	1818.95	3260.77	1597.69			2462.5	1	203.052	720.703	386.456							153.892				3760.68		996.409	1406.23
P02750	Leucine-rich alpha-2-glycoprotein	LRG1	3	3	33667.4	2556.58	882.775	1956.72	12437.3	11016.5	9499.81	1172.21	3404.18	4815.11		9697.2	3299.97	1774.2	1522.52	4146.02	1695.06	6004.8	8626.4	479.651	7223.04	2598.93	3476.94	7074.99	15504.9	4775.64	2420.86	2800.81	4966.18	2681.55	11711.4	2882.75	6367.7	6417.89	16028.3	4957	3073.54		3571.01	4161.17	5763.05		3340.09	3224.77	1055.98
P02751	Fibronectin	FN1	58	58	50453.3	9196.55	9006.21	21654.1	9864.13	18041.6	17717.2	60036.6	74446.6	11936.6	180484	17760	31396	41808	8689.03	38403.5	13231.4	6992.34	8687.26	12406.1	88449.9	90098	20748.4	80093.2	12406.9	30496.5	9510.54	16423.3	19975.7	13416.5	31418.5	23867.7	3296.55	7773.52	71469.6	68653.6	11326.7	5750.69	15369.3	19004.8	28693.3	358133	5706.94	4176.29	14175
P02760	Protein AMBP	AMBP	3	3	10411.2	212.051		1819.65	1014.32		1344.82	338.541	502.502			4136.62	876.094	784.381	1006.75	2594.12	423.57	2620.13	4516.8		4557.48		563.721	1032.78	1798.71			540.056		7427.62	3398.52	1485.59	1116.37	1198.17			907.852		901.208			4131.78	1287.1	850.204
P02763	Alpha-1-acid glycoprotein 1	ORM1	5	5	139756	5886.13	3261.05	8418.63	14696.2	10863.6	21925.6	7256.61	3165.07	18382.2	17142.2	16248.8	8926.08	4847.96	4277.75	12563.7	4048.25	14086.2	26457.2	2292.45	11438.6	17366.5	3922.99	14374.7	64213.2	22356.9	11384	6148.08	28075.8	30311.7	175927	16156.8	27105.2	28296.4	88611.5	23347.6	4372.23	5134.62	10906.1	24653.8	44129.4	50214.5	9261.31	16600.9	62182.1
P02765	Alpha-2-HS-glycoprotein	AHSG	3	3	13937.8	1241.84	2624.06	5091.75	15870.2	5185.41	15760.3	1104.96				10585	8457.34	10212	4828.91	15113.7	2015.85	76121.2	13267.6		5110.66	11345.8	1	5712.71	11510.4	9624.93	5454.27	2654.01	10836.7	6740.62	50373.6	7727.74	13330.7	17042	34334.1		3342.17	5441.09	6572.2	8393.11	33349.6	6644.27	5887.85	6247.78	4248.32
P02766	Transthyretin	TTR	5	5	31935.5	2379.24	4865.03	6854.1	13658	3982.53	12858.7	5984.82	9608.89	9883.51	12.9876	22618.2	9972.81	20555.3	7515.39	17337.6	3247.87	10809.3	11684.5	4768.91	17984.7	9029.96	5187.68	16308.4	40528.8	60766.8	30155.4	5325.76	19881.8	31448.3	114344	22533.8	21790.9	30401.5	205336	154613	6578.87	23112.5	12117.4	41434.1	35996.2	73362.3	12043.7	10014.9	33166.7
P02768	Albumin	ALB	37	37	277170	61065.8	69095.9	118900	303586	96858.2	223712	116145	147125	307521	1.57679e+06	160532	122313	129771	85123.8	201568	51193.3	162765	124325	66397.1	1.01539e+06	493895	119659	280720	334256	880118	566125	50595.1	160169	121052	635858	125311	139533	141032	4.4547e+06	1.60866e+06	68268.1	252945	178629	478025	441012	2.35785e+06	155328	108461	713830
P02774	Vitamin D-binding protein	GC	11	11	33946.8	1927.95	4417.73	3754.99	11411.6	2632.07	7670.54	5014.81	15139.2	12436		5919	3022.99	2876.14	4942.5	5269.93	8663.93	1317.86	3175.51	1856.52	27775.2	32484.4	4926.21	4029.17	9441.41	80522.1	24940.3	1948.46	4403.29	3488.21	22030.9	2556.81	5185.77	7112.27	255318	190247	3024.6	8273.33	15065.9	26909.9	23634.9	201625	5648.63	8631.16	24853.2
P02775	Platelet basic protein	PPBP	2	2	6196.55	3111.24	2093.64	1757.77	5905.66	8931.02	1555.06	245.341	995.167	3222.93		1134.97	137.615	705.232	211.118	506.12	665.556	764.726	445.853	2370.51			2823.12	3543.66	11242.7	3605.29	4508.24	855.164	273.337	681.16		777.05	100.039	1426.16	4024.69	8812.5	6830.23	679.716	261.158	243.547	3402.44	4.83542	2343.67	2889.55	9267.75
P02786	Transferrin receptor protein 1	TFRC	14	14	3784.33	1801.43	3193.42	1627.64	1047.68	9020.89	2222	3083.22	6323.91	3838.25	16324.3	2036	2819.74	3515.75	2080.14	5431.45	2288.83	2895.61	16422.2	4535.14	4045.96	1505.84	3451.67	336.795	604.006	5157.17	8264.5	4507.42	10710.9	10046.9	8656.47	4891.23	1606.27	7672.29	7750.2	18016.6	11191.9	4746.04	10285.5	4226.71	987.063	2323.71	1669.85	844.089	1850.74
P02787	Serotransferrin	TF	20	20	12994	5746.65	4155.52	8157.77	19472.5	1820.4	10816.7	10105.8	14992.2	41652.2	289129	9690.82	6013.65	16590.3	3902.01	9083.48	2548.04	11871.3	2822.4	4115.33	91068.4	54036.1	7459.34	10390	44348.3	116471	33056.8	6455.71	12165	16184.8	72957.4	12350.6	18060.8	11389.8	978945	433895	14599.8	46111.1	16894.2	94998.3	106324	587679	21622.7	20508.2	98077.3
P02788	Lactotransferrin	LTF	26	26	85533.3	3763.58	921.552	2155.45	1726.62	3255.74	1553	1814.54	2436.11	13311.1	52592	656.007	622.282	1956.21	605.906	1040.18	607.629	230.975		1762.78	2316.09	50244.9	1184.2	2230.37	5643.12	8251.2	3535.89	926.071	1259.26		2455.76	657.468	849.78	2466.18	14551.2	44066.8	4228.17	5179.72	1945.85	4777.48	5374.46	32309.2	1695.34	6290.94	14258.5
P02790	Hemopexin	HPX	11	11	72036	13218.4	7291.75	17091.5	37841	19561	23928.1	22214.1	36273.3	47013.2	1.29102e+06	45376.2	16644.1	11190	20135.5	39067.6	9749.07	24651.7	45002	47582.2	149624	149326	21735	40676.2	55236.8	27389.1	38536.9	8155.11	46842	35530	95768.7	22670.5	24921.7	38482.4	101658	85093.3	12110.6	15512.3	18108.9	69567.1	49407.9	81517.4	23875.1	16042.5	75293.9
P02792	Ferritin light chain	FTL	9	9	299263	102854	26942.7	33488.5	61079.2	125484	1.15676e+06	106943	44674.7	189637	405118	251478	65000.8	29148.2	172034	178522	21159.8	182335	86239.9	166329	150159	133705	173242	340187	244701	101177	22380.5	60323.2	290485	353603	2.22693e+06	68737.9	166343	103816	938022	142023	64325.3	66191	36988.1	413000	180221	186265	86682.7	176562	378763
P02794	Ferritin heavy chain	FTH1	10	10	29478.3	12023.5	17360.8	9125.3	28631.5	19389.9	60856.4	19722.7	24036.6	162788	453288	16685.9	9160.9	12347.9	22781.5	24809.2	13747.8	17233	21240.8	22563.7	140822	147562	20184.6	36409.6	38551.6	47811.9	9830.87	13112.3	44339	31098.7	173248	12322.2	58193.7	23929.2	185641	101677	7669.46	19958.1	11365.9	62729.4	76266	160732	47059.7	99209	187967
P02814	Submaxillary gland androgen-regulated protein 3B	SMR3B	1	1								1250.11			57874.8						748.356				8502.58	16981.3			4014.11											23939.2	2244	2576.39				24873.6
P02818	Osteocalcin	BGLAP	1	1																																												316.658
P03891	NADH-ubiquinone oxidoreductase chain 2	MT-ND2	1	1								558.709						96.5147		1	1	625.752			2151.94	1296.56						151.017									832.521	315.267	246.14		1	728.283	1488.91
P03915	NADH-ubiquinone oxidoreductase chain 5	MT-ND5	2	2	5641.02			996.773	3555.03			2877.51					22.0785	1364.04	1	1		2235.98			21360.1	20124.9	1		1617.12	8176	1052.14	6958.39	282.897	5207.46			1946.94	5382.11			6578.57	6336.3	8232.53		7998.64	2500.03	7425.39	4770.31	5383.82
P03951	Coagulation factor XI	F11	2	2	246.636				142.583		3308.7	283.836					214.375			350.394	45.3636						108.377	683.651				50.7236															66.9552
P03952	Plasma kallikrein	KLKB1	4	4	1425.58			498.328	1419.56	1	1147.62	318.359	990.593			1355.37	215.365	385.946	347.352	1089.06	241.303	2161.42					481.889	767.793	653.71	5975.46	187.93						186.884				166.062	79.9341	162.346	1592.83	515.671	4908.68	860.302		609.458
P04003	C4b-binding protein alpha chain	C4BPA	5	5	50356.4	7089.89	2169.07	17059.8	7689.79	6726.61	2220.15	11058.8	7558.22	10196.4	11644.6	6952.17	3092.23	7607.7	2356.49	20091.2	9369.4	5222.59	1912.63	3537.42	55369	72339.3	5346.61	4460.78	11800.5	31605.5	8971.11	5947.75	8476.41	4630.41	14406.1	3687.29	3320.96	8338.99	22430	37451.9	11427	13597.9	8937.74	26531.6	33727.7	11628.3	11864.6	6020.78	8260.12
P04004	Vitronectin	VTN	13	13	247366	6253.26	21308.6	77568.5	14136.6	12981.3	38291.5	17752.6	64560	15259	114355	10316.3	14672.3	33089.4	9287.11	63584.6	20322.3	43703.1	11842.8	13123.1	27720	43595.2	14084.7	71829.5	12298.3	21350.7	10945.3	11596.5	9069.93	13453.8	88251.2	18530.1	3199.85	3899.44	38818.3	209852	9314.99	7945.74	5334.2	29236.9	31339.1	2830.48	4296.79	16111.6	25059
P04040	Catalase	CAT	24	24	38940.9	8769.05	14176.8	9811.01	16805.4	31795.9	20472.4	13793.6	31535.9	28155.5	223266	6509.97	8540.59	9031.08	6050.11	9770.06	13043.6	16695.3	8586.82	19298.9	40032.5	100189	21112.2	18457.5	13981.9	156331	19290.2	13907	10151.7	7869.51	68342.8	5568.79	5541.1	11365.2	70035.4	123122	18715.3	14077.1	5103.39	41805.6	34898	377561	6994.78	9337.08	15573.7
P04062	Lysosomal acid glucosylceramidase	GBA	3	3	1890.38	2644.09	2344.37	850.236	1637.88		2089.61	4039.99	7492.83	2860.63	5795.07	2763.21	1738.05	746.421	1624.16	1504.58	622.718	1527.07	866.513	6682.94	8005.96	34595.2	2024.19	3944.16	5531.14		822.809	1227.6	996.716	2572.69		3073.61	3486.88	1308.4	11066.7	12834.2	2842.46	7540.93	974.445	726.557	7761.64	4722.67	2882.12	2764.26	6352.05
P04066	Tissue alpha-L-fucosidase	FUCA1	8	8	11494.7	3306.45	16183.4	5990.06	7569.58	20343.7	15417.2	10063.2	37227.4	6628.58	18154.2	12265.5	7900.47	5900.65	8063.76	15025.9	7118.52	13926.7	12762.9	9387.06	11226	16270.8	10875.2	29197.2	4528.88	17049.1	19113.3	6475.06	10538.9	18584	37810.6	11658.4	5849.19	5402.59	13761.5	8343.05	4239.48	4022.58	8845.62	10104.8	12684.6	4211.03	2610.43	2980.37	11063.5
P04075	Fructose-bisphosphate aldolase A	ALDOA	25	22	99876.8	64650.5	103245	44922.5	197991	64234.9	85438.9	56840.6	148416	208357	1.31223e+06	50763.6	48193.1	102281	70245.5	80837.3	102333	567877	122532	86030.8	416368	188397	101484	117827	344769	529687	227879	72831.2	138169	137505	381196	138699	123584	103447	1.45914e+06	798726	48055.9	128248	127862	272351	192182	2.19062e+06	137303	248468	607219
P04080	Cystatin-B	CSTB	6	6	9200.86	5891.77	8910.37	6084.91	9023.1	8037.2	14718.9	12019.9	20988.6	39987.6	83962.9	9121.37	5829.29	5462.69	7000.37	9424.88	3975.06	31486	15042.1	16701.3	45710.2	43123.3	8333.39	18125.9	22591.5	25165.9	7894.8	11909.7	31565.6	51395.9	194542	30981.3	15276.5	22749	92969.9	63013.6	6370.3	15040.7	5235.48	24046	28787.4	109449	8201.83	18465.1	61478.5
P04083	Annexin A1	ANXA1	13	13	50619.1	20290	13195.2	16221.6	3925.8	9645.25	16563	18387.2	50663.3	31866.3	44050.5	9505.52	10781.4	10296.6	12431.2	25147.1	8629.39	21865.2	10922.8	26615.9	51374.4	42135.3	33224.5	21885.9	31572.4	82262.6	18876.4	11460	14158.8	20669	72065.8	9403.85	10262.9	11793.8	123505	98446	16672	46778.1	12606.6	40518	45945.5	576280	15495.4	11248.3	29818.8
P04114	Apolipoprotein B-100	APOB	41	41	211358	18280.9	22800	9642.04	49621.6	695788	22750.4	6069.83	32054.3	56314.4	81735.4	6895.27	7862.28	6890.79	6793.38	17243.9	67222.6	30743.6	53250.1	39770.1	29103.8	46177.5	16724.5	37808.6	15584.7	334542	73873.4	14932.6	16363.2	7119.84	359081	4926.77	4431.8	23061.6	89019.7	391140	14843.6	2087.21	2857.2	46942.6	64575.7	12511	6330.3	13660.8	133517
P04150	Glucocorticoid receptor	NR3C1	2	2	6606.61	3148.38	8127.52	2569.71	2858.37	7707.24	2872.47	4589.14	14360.8			3152.86	5621.85	6468.44	5610.11	2548.51	4446.85	4718.43	16006.2	8418.08			4660.65	4395.1	1323.08		4672.22	1774.89	4745.08	3928.77		5193.08	974.428	5552.04			3714.43	5357.14	4022.6				1333.11	2164.03	1558.4
P04156	Major prion protein	PRNP	3	3	572.988	2194.12	254.139		24415.4	1400.86		169.182	3195.46	20770.1		3884.55	3774.1	2655.06	393.561	4656.96	1581.79	3032.4	3462.51	1498.45	47473.4	39303.9		747.067	7566.4			5685.54	1	355.55		5118.6	13924.2	6182.61			73.0731	119	6316.37	1087.18	3914.67	17588.8	8426.81	10184.2	13006.2
P04179	Superoxide dismutase [Mn], mitochondrial	SOD2	11	11	34316.8	38102.2	24897.4	15256.4	32118	20144.9	35427	57784.4	41219.6	95809.3	354130	18168.9	23105.9	25061.2	28873.2	31144.8	14082	17915.4	61638.7	114087	400409	72891.9	75720.8	58139	69708.9	40687.5	31045.6	24652.4	59270.3	104239	160752	17837.1	14406.7	23640.3	141905	74649.3	11773.6	31517.1	16988	66741.5	40027.6	118222	22757.4	25734.1	82547.9
P04181	Ornithine aminotransferase, mitochondrial	OAT	5	5	2416.16	1482.59	2769.72	1605.26	4662.32	1441.87	764.924	782.042	1924.82	4982.1	11.0357	2176.13	1353.51	1289.91	2571.3	1650.65	963.677	2566.86	1414.43	2377.93	9969.99	3238.82	2873.89	2220.08	3088.4	1395.68		1642.84	1791.07	3971.41	1337.7	1459.05	3243.25	2147.35		1391.54	786.659	510.479	1753.42	4138.54	1375.59	2.14156	2099.54	3822.25	4079.26
P04196	Histidine-rich glycoprotein	HRG	6	6	6119.97	3513.08	2342.01	6730.15	7892.39	9423.54	2346.83	3429.59	16380.7	10037.7		4887.71	4248.68	6669.92	2483.33	6255.92	2436.15	12080	328.287	3202.11	9705.82		6015.14	10852.9	1986.68	13627	1998.03	1911.12	4446.42	8433.25	20705	1039.6	6132.57	1203.15	39267	2603.62	2558.05	3119.42	6516.32	4845.48	11694.1	23632.8	8224.55	3481.18	17146.9
P04216	Thy-1 membrane glycoprotein	THY1	5	5	17376.1	13644.7	15664.7	14487.3	225925	6292.01	9261.63	12592.8	29253.2	158148	1.48146e+06	23498.9	9179.1	14053.8	15034.8	14839.6	12507.2	56187.9	6532.52	15462.7	314277	164017	7842.19	37474.5	215399	47685.5	15109.5	24019.4	30409.7	12055.2	92953.3	21687.9	78191.4	37731.1	68295	11897.1	8708.43	12564.2	18839	39079.6	192920	324624	76962.8	439122	943605
P04217	Alpha-1B-glycoprotein	A1BG	11	11	10974.9	1401.5	1232.99	2437.31	4394.07	3519.79	2434.21	2303.84	4142.08	5320.1		6380.05	2760.39	1416.59	1701.45	3732.64	1480.56	3110.21	5449.29	717.347	21968.1	3223.66	3601.8	5838.91	4391.68	2627.1	1698.11	1374.1	1488.85	4177.22	9126.78	1791.01	2584.04	2973.77	12450.3	1812.51	649.86	595.02	828.345	2433.77	8633.83	3702.55	3796.48	2794.76	4260.04
P04233	HLA class II histocompatibility antigen gamma chain	CD74	6	6	9948.08	13029.2	28000.6	14052.1	1009.1	19800.2	21126.1	33818.7	24688.5	15792.2	114252	4198.15	34133.4	17662.5	19924.9	15093.4	18630.6	20494	20115	22347.1	12889.5	32836.4	34077.7	13729	14434.1	5110.29	55874.3	22348.6	46289.6	33702.5	28883.3	41841.7	11832.7	14495.5	32764.2	74350.1	82946.5	43561.5	61550.9	26992.9	11169.5	68975	5575.52	9633.1	8820.49
P04259	Keratin, type II cytoskeletal 6B	KRT6B	5	3	613.825	3593.26	2275.95	1037.95	5656.52	1644.02	1606.97	1083.48	1	19187.9	849550	923.167		1469.73	1125.42	519.9	3893.07			2233.78	24185.3	550710	7384.92	1535.74	5857.84		355.961	2527.01	1969.35	662.905	4055.47	2293.49	4043.99	4199.18	48410.1	89027.8	2639.56	14097.7	2212.35	13588.8	35674	49743.5	694.459	11208.4	7565.19
P04264	Keratin, type II cytoskeletal 1	KRT1	43	39	162167	296444	291933	52266.3	221607	55244.9	73170.8	187566	252794	1.65073e+06	2.68896e+07	56074.1	67044.6	154044	53592.2	60292.2	37130.8	92132.3	30318.5	263511	1.19162e+06	8.62074e+06	249229	109296	516125	234952	254224	57839	159366	70517.8	646634	211232	117817	82678.7	3.52925e+06	4.63712e+06	183733	698308	151361	649858	1.16264e+06	2.69077e+06	197794	419630	1.14734e+06
P04271	Protein S100-B	S100B	8	8	28563.1	47910.8	10891.3	31423.9	75305.8	20692.7	28903.3	33996.8	40834	487298	558224	30431.6	10800.5	4971.73	20828.2	41724.5	25016.3	61340.5	10929.4	30181.3	180923	416697	30777.9	39530.5	178810	127977	31226.8	14111.1	53512.8	62948.7	442791	29281.3	354653	59609.9	287376	85775.2	30301.1	35589.2	38197.9	106482	369778	429714	168273	312297	870704
P04275	von Willebrand factor	VWF	17	17	7419.74	2872.4	2629.39	2938.32	2333.87	6638.1	6604.57	3002.56	8893.33	7553.72		2212.69	2350.74	3243.19	2089.34	3574.44	4089.73	3297.58		2229.61	10853.4	6557.89	4346.14	10201.7	5680.05	8194.6	6380.58	2177.34	2827.04	2711.33	2629.65	1172.11	4093.96	2404.81	13422.7	10139.5	2411.88	1850.25	1860.56	5350.13	2366.96	1892.82	1452.17	4944.37	1
P04350	Tubulin beta-4A chain	TUBB4A	2	2	29968.8	94043.1	54129.3	60777.8	709266	14611.7	13396.2	37495.7	167426	846011	2.00471e+06	48698.3	11525	5361.47	52235.1	62750.2	41830.8	159619	16657	92268.7	820914	901408	83646.2	93341.4	175114	39467.2	2210.78	29401.5	4101.93	2428.59	70132.5	2036.8	142749	27113.5	64928.2	21084.7	15534.7	26162.9	32417.6	82936.9	374193	684731	212426	447922	404492
P04406	Glyceraldehyde-3-phosphate dehydrogenase	GAPDH	22	21	85487.2	93457.9	81664.2	83737.1	194486	99902	110522	54399.8	170873	173484	662756	98176.2	78979.5	72995	139375	112231	84168.8	107827	120204	78677.3	364791	260850	106006	137134	149798	113097	123049	68718.9	95320.5	91273.6	205655	131090	102298	103509	374135	176763	56351.4	45978.8	72641.2	118868	149146	251761	77603.3	148452	234909
P04424	Argininosuccinate lyase	ASL	4	4	8321.83	2134.14	1837.77	2517.65	5279.23	2910.88	7019.91	1043.62	2119.4	5151.08		2024.04	2542.31	2361.81	1176	5141.01	3137.2	5957.6	5674.32	1131.15		15300.3	956.352	5786.43	5801.07	6910.88	3658.55	1457.7	2350.65	3962.04	7591.31	1829.73	1837.25	3355.54			1435.32	1277.15	1447.44	1	1694.68	1071.27	1904.71	4573.64	12409
P04439	HLA class I histocompatibility antigen, A alpha chain	HLA-A	9	9	327813	87293.9	27922.1	61994.1	20291.4	43233.9	56181.7	52822.6	96079.1	261944	583723	33527.1	96736.2	77070.9	64956.8	79734.6	15078.5	77663.6	85607	114672	218643	30326	163588	168945	97345.8	42405.7	35717.6	62258.8	187529	100491	271497	80680.4	43290.5	90032.8	394085	97457.2	51276.8	55637.2	13390.1	144450	73152.3	214617	84784.8	35079.1	102297
P04440	HLA class II histocompatibility antigen, DP beta 1 chain	HLA-DPB1	2	2	8746.06	4686.1		2884.25	428.685		4719.61	8077.35	1087.78	19305.7	43193.8	2348.79	7234.06	8863.58	5406.43	3651.24	1603.34	2138.31		4734.52		4510.07	19961.3	1186.61	2162.69		5271.9	2938.96	19074		9075	11132	793.206	4241.4		5314.9	6757.24	12184.5	8234.32	10326.1			1188.72	814.881
P04632	Calpain small subunit 1	CAPNS1	6	6	13227.1	4683.49	7700.88	5351.46	13112.5	13576.3	13496.4	4091.78	9860.39	19897.4	53838.6	8204.87	8399.27	6682.66	5131.82	11709.9	3081.38	9180.87	25827	4880.11	10241.8	10772.1	4404.15	11179.4	19541.9	15650.5	9132.15	3804.85	16164.6	16793.3	24143.2	8331.04	10865.9	9289.87	17396	8635.42	4531.14	4440.83	4093.56	5861.86	10076.9	7661.42	4405.12	13386.8	25621.2
P04792	Heat shock protein beta-1	HSPB1	13	13	65691.8	90153.1	71460.9	57457.9	89200.8	98890.6	70997.4	82863.7	296874	326047	675092	113095	70187.9	69451.7	63533.2	135580	36082.9	96051.9	111520	60054.2	339482	296677	152058	191429	194040	117865	78647.7	32129	107782	96217.7	199883	47897.6	51362	36680.4	333288	165321	22985.6	55678	29198.9	101314	135555	359796	64247.4	116315	155095
P04818	Thymidylate synthase	TYMS	7	7	4409.62	1582.39	2039.26	3156.27	1860.18	10171.5	3078.35	1841.19	2587.97	575.448		2548.86	6064.93	4782.49	11253.7	4043.98	2152.21	2665.1	7800.79	8402.77		4988.37	6791.04			1560.21	5701.22	2146.12	4998.33		607.652	8333.12	2445.53	8618.07	1604.84	2315.8	2456.72	428.826	3443.54	747.504	3104.42		1512.78	699.032
P04839	Cytochrome b-245 heavy chain	CYBB	3	3	9419.64	1256.98	279.886	813.694		4285.62	2877.44	2645.62				888.938	706.135	1690.83	116.657	297.897	2707.98	1939.24	5943.83	7386.33			1706.15	2796.91		849.768	11805	2287.54	4461.58	10448.8	8292.7	1426.76	234.965	20588.9			2355.97	1565.03	627.661	3259.95		10135	585.799		10647.3
P04843	Dolichyl-diphosphooligosaccharide--protein glycosyltransferase subunit 1	RPN1	16	16	13352.1	5156.98	3001.93	8166.65	3520.92	5562.93	4961.41	10311.3	7292.24	10396.9	20985.7	3031.08	3235.43	6826.03	4012.05	6304.91	4006.39	8475.52	9587.39	8022.55	10934.8	19613.4	5735.17	4516.83	4322.16	20432.2	11960.6	10289.8	7910.03	9672.49	10867	8651.33	5169.04	5961.24	22445.4	22127	14286.4	14077.1	15456.5	13205.4	8143.34	15145.2	4897.84	6073.2	5127.27
P04844	Dolichyl-diphosphooligosaccharide--protein glycosyltransferase subunit 2	RPN2	11	11	12880.8	4117.91	5776.13	8359.75	4864.24	11526	7074.93	8403.41	9080.46	18199.6	53702.6	3248.33	5253.21	6759.44	5563.45	11032.4	5722.56	10384.7	23880.3	6029.23	9285.37	19266.6	10191.5	6690.53	10285.2	18338.4	9207.35	9519.07	16862.9	17026.3	21813.8	11455	5027.88	18443.4	23262.3	34256.6	16901.9	12947	16825.9	13844	12651.7	65417.4	6633.81	3965.18	7201.86
P04899	Guanine nucleotide-binding protein G(i) subunit alpha-2	GNAI2	14	8	13579.1	13288.9	7642.81	11934.3	35789.2	23532.6	19210.9	13245.2	15461	30679.1	106584	7275.29	8926.14	8618.73	9006.3	15588	12132.3	25831.9	18742.8	16693.7	58059.2	40137.1	7197	16481.5	26813	14664.4	14869.6	12135.3	19600.6	23224.1	31512.7	11846.3	16199.5	12957.2	39332.3	21789.8	12853.3	15460.7	9723.24	21367.8	30403	43832.1	22487.1	50777.9	71752.4
P04920	Anion exchange protein 2	SLC4A2	5	4	922.009	802.413		1318.12	736.728	2125.06	1557.33	442.074		546.63		1423.79	618.797	933.313	629.909	1288.48	657.299	3568.66	2494.37	706.203			372.17	1064.59		1188.53	672.7	1442.9	236.721	206.059													79.629
P04921	Glycophorin-C	GYPC	1	1	4049.02	5869.29	1273.23	3527.68	8607.23	18909.4	6702.81	1418.31	1818.73	8972.83		3156.76	4214.9	483.726	190.19	725.693	3742.29		13435.8	6269.83		5909.87	2664.09	3967.99	24973	69981.6	20245.9	6408.87	19983	8726.75	66030.1	7472.97	6235.23	20574.3	25391.3	79211.2	22453.3	4685.58	13170	81027.9	31761.6	1024.46	2891.86	9396.44	68134
P05013	Interferon alpha-6	IFNA6	1	1		757.759	718.908		8352.03		152.837					783.57	374.458	573.376	411.72			684.917							3178.42		342.963	501.136		726.163						728.947			375.392						20688.8
P05023	Sodium/potassium-transporting ATPase subunit alpha-1	ATP1A1	13	13	20959.5	8142.68	13488.9	17778.4	69563.5	13650.8	7385.35	13404.5	19922.3	46905.7	138093	7548.29	5984.19	10806.1	10777.5	11052.8	13313.2	40832.7	12582.5	8434.62	116384	54433.1	6856.99	11230.4	42796.7	51357.8	18225.9	13066.7	23214.6	14034.2	26564.4	10244.2	18022.1	14649.8	30431.2	28442.9	13516.9	14036	20974.9	25027.1	49735.2	62187.2	32659.5	36591.3	76658.7
P05026	Sodium/potassium-transporting ATPase subunit beta-1	ATP1B1	6	6	4687.01	7558.48	4790.17	5564.76	67206.8	437.023	710.518	8754.14	10593	42006	297553	3964.42	1569.59	3654.05	3675.75	9271.13	8998.02	30077.3	330.194	4830.78	171720	160304		8700.34	40017	17806.3	828.53	9310.9	2389.96	1420.85	6274.26	1624.89	17979.9	11688.4	21761.7	5199.5	4235.29	9566.33	10799.8	19233.8	33492.4	62031	37903.3	46331.8	64921
P05060	Secretogranin-1	CHGB	7	7	609.138	561.565	1687.07	409.206	5252.08						12700.1	1864.49			892.06	973.704	1991.24	16465.7	250.461		18758.3	794.469		2007.78	18077.4	1430.37		1239.74	185.222	109.828	792.861		939.047	3647.56				206.867	676.039	410.928	874.696		1528.19	11856.8	45982.7
P05067	Amyloid-beta precursor protein	APP	4	4		1827.57	404.081	1135.43	1668.11				850.849	2032.9		798.244		4049.76	1	552.028	2310.88	1235.78					794.812		20882.2			1496.6					1349.6	1099.25					334.533	1331.45	6575.43	8157.7	1513.3	3600.62	6036.02
P05089	Arginase-1	ARG1	10	10	5568.27	4190.72	2363.89	1246.05	2403.54	1198.1	820.338	3672.81	1040.89	22260.1	311219	557.378	449.785	1145.19	354.454	343.396	355.114	758.319		4490.39	16043	170485	4383.86	960.496	10759	6238.85	7135.17	1038.12	3980.32	1418.25	7017.93	3371.64	2456	1491.63	53093.9	123575	4303.33	18266.6	2224.21	12680.1	34421.1	50951	2331.57	7161.4	19090.1
P05090	Apolipoprotein D	APOD	5	5	16089.1	16159.5	19138.8	4655.69	23464.6	12808.7	12846	4523.21	8121.03	96321.1	401679	13547.9	5994.5	2087.63	9831.52	15467.6	8384.76	19564	16960.5	6149.56	72234.1	80704	3474.02	188379	53678.6	102.35	11497.4	7937.12	17135.5	74863	75662.6	11111.6	27836.4	16080.3	133894	91146.6	6650.66	4361.02	9360.28	27747.3	16682.3	82961.5	27664.7	68281.9	160940
P05091	Aldehyde dehydrogenase, mitochondrial	ALDH2	17	15	10367.4	3380.4	9536.66	5018.69	31398.4	7465.14	12921.9	17056.9	32943.3	13209.2	93302.8	3572.27	14888.9	6504.96	2696.85	4928.93	5640.25	55912.7	11943.6	16490.3	27485.2	21143.4	24745	16640.9	16342	33484.2	15903.7	7061.6	11069.5	34209	35645.8	13196	7713.48	3489.66	108707	64531.3	5783.7	15398	10074.2	35785.6	18205.1	58496.3	6413	9246.86	18936.7
P05106	Integrin beta-3	ITGB3	4	4	3134.47	2116.68	1155.37	2029.59	3843.45	4794.84	1028.17	240.371	1574.92	2826.36		816.236	749.247	1052.41	589.212	392.526	2407.2	8247.96	553.25	2547.29		1.99788	2435.2	1725.5	1286.8	7970.84	2348.17	619.353				1				8184.25	3066.46	485.808		1478.87	980.609			102.969
P05107	Integrin beta-2	ITGB2	10	10	23154.9	2983.91	1054.31	2635.66	320.031	1678.55	2579.37	3357.58	3958.99	2813.68	30389	1113.29	1555.98	3362.73	1564.64	2410.39	1257.3	3670.83	1784.78	9869.61		4686.98	1918.57	4915.56	319.682	1482.68	579.419	2416.27	4925.11	8990.82	6056.47	2872.75	1440.74	1412.58	4580.83	1995.7	3431.03	2989.79	1431.93	8084.2	3994.78	6805.03	917.923	901.985	1010.7
P05109	Protein S100-A8	S100A8	6	6	540778	96202.9	14840.2	19368.4	24977.6	122979	129775	46472.2	25983.2	130882	4.30448e+06	30825.6	24817.1	9942.51	40169.3	92363.2	5804.65	179155	99223.2	54897.2	100151	643301	43173.9	76956.2	120806	57590.1	56077.9	14106.9	66307.8	78430.4	405202	45951.6	37251.6	63617.9	375333	785447	53372.8	83772.7	19194.8	160161	319658	243780	22166.9	88944.2	147783
P05114	Non-histone chromosomal protein HMG-14	HMGN1	1	1	41.9594		33.7961	31.4444		37.5224	1						23.0538		10.0121	1	1	1	61.6257	64.759				58.0376					1			58.236
P05120	Plasminogen activator inhibitor 2	SERPINB2	4	4		3444.96	8390.96		3682.74		478.48			2326.85	30810.3		71.9157	95.9548					1	1084.62		49169.7		2893.04	4348.84		10681.9	96.0895	10906.7	1		5459.91	239.84	98.6262	22174.7	25085.2	2706.52	3790.29		5252.05	6623.25	9719.83	797.99	969.665
P05121	Plasminogen activator inhibitor 1	SERPINE1	2	2	3013.94	277.299	1240.66	3691.46			319.899	1037.1	12183.1			1198.57	2081.47	1333.55	789.521	3937.53	1081.92						4370.89			1320.24		1293.28				1317.1					307.294
P05129	Protein kinase C gamma type	PRKCG	7	7	2026.98	1591.59	1441.03	409.353	14430.5	929.095	87.5273	922.616	15273.5	9776.71	31970.6	1242.58	651.164		1103.55	2121.36	409.87	47035	1401.71		20272.8	36272		1356.04	5580.81	2049.91	498.614	2538.78		2766.46	537.723	814.919	2060.43	5774.16				419.009	509.929		4819.38	10848.4	3202.71	5130.7	13506.2
P05141	ADP/ATP translocase 2	SLC25A5	4	4	12698.9	6255.64	11328.3	9795.39	23494.2	23843.3	6057.24	10536.4	18691.2	21919.5	345424	5265.76	6176.18	6741.95	6220.86	9181.02	5858.08	4484.05	30364.6	19201.2	58802.1	61587.6	16413.4	9803.27	18905.6	11019.4	10409	8657.38	18105.8	20330.2	43402.1	6090.14	6384.71	15005.2	53042.9	46432.8	13720.9	16403.1	19270.4	29682	14923.1	24167	8438.86	10440.7	31410.4
P05154	Plasma serine protease inhibitor	SERPINA5	3	3	6497.02	527.688	1829.37	3020.15	2522.45	3261.92	9668.96	709.809	3056.42			1971.24	2124.86	1895.35	2375.4	3138.09	1847.52	2083.79	5001.44			6380.24	4037.09	4153.02	2890.1			1504		3324.92	9522.78	1416.45	961.815			12987.5	2319.03	619.032	958.604				545.591
P05155	Plasma protease C1 inhibitor	SERPING1	6	6	71273.9	6159.54	12589.2	10440.7	32982.9	13002.8	17270	8439.3	24636.4	36911.2	101303	30312.8	15193.8	12748	7593.8	20085.4	6255.27	96238.8	10732.6	13960.9	118117	60567.6	24775.8	28139.2	37763	51918.3	9870.86	6361.86	14872.8	23317.5	47753	9106.47	10022.6	13017.6	57759.2	24232.2	6007.59	5160.51	19555.4	29702	30237.8	38522.2	14276.7	11158	17507
P05156	Complement factor I	CFI	4	4	12717.8	1395.17	4762.08	2285.89	5146.95		2282.53	1126.69	2648.07	5444.68		4434.68	1819.5	2047.03	2012.81	5871.08	565.549	14581.2	1243.9	1142.85	32513	14066.5	4999.51	4400.98	6731.28	3794.72	2729.25	496.935	5170.64	11001	14285.4	15468.6	2854.73	10436.3	12654.4	8208.01	3646.04	1376.64	5180.29	2226.03	1954.79	5534.31	899.112	1717.71	2135.55
P05161	Ubiquitin-like protein ISG15	ISG15	4	4	27555.3	9217.35	2852.92	5427	5219.74	5844.96	12550.8	2694.71	5532.98	27077.1	5527.84	6353.67	3997.98	9469.98	7043.34	31106.9	8272.57	11138.7	19515.3	6031.3	9962.61	11261.7	5698.06	8962.47	3394.9	21853.9	5873.08	5347.06	3378.89	3816.06	7369.68	1405.33	7917.98	5283.96	14422.7	1126.88	4050.73	6563.69	5229.35	8299.48	12521.1	11068.9	4203.43	5258.83	8197.04
P05164	Myeloperoxidase	MPO	25	22	680869	10382	6550.14	12303.8	23194.4	56906.3	7093.39	8850.96	13515.2	25863.5	39534.9	5826.32	6833.12	5648.41	7366.06	12732.2	6808.48	26589.9	20722.1	14040.9	13724	31313.2	13083.4	10677.3	23369.4	51972.5	23285.6	5080.15	15711	7231.85	104321	10002.6	7718.07	14977.8	31222.3	83545.3	41329.3	6518.42	4777.58	34414.7	18610	22607.5	5905.48	16418.2	41000
P05165	Propionyl-CoA carboxylase alpha chain, mitochondrial	PCCA	10	10	2388.29	1175.05	2794.98	2452.1	3466.09	6612.21	1511.28	1497.13	373.916	1113.62		1606.04	3659.38	6617.65	26190	3045.34	6847.9	13827.3	139.149	3797.58	6320.25	13105	28005.8	4685.08	2686.54	174939	294.718	2624.22	30093.2	2197.17	103971	578.358	3266.92	2117.66	9133.18	8140.65	1875.81	1712.85	1316.43	1	2254.18		2668.27	6373.89	10029.9
P05166	Propionyl-CoA carboxylase beta chain, mitochondrial	PCCB	7	7	3619.3	2404.73	3247.05	1542.77	6378.73	2300.32	2736.36	2916.52	6342.49	6800.17	14344.7	2089.61	1502.74	3233.4	1425.53	3402.92	2670.91	5854.54	2970.96	2162.65	11705.2	7262.96	2366.39	2324.97	3605.38	1530.1	2462.2	2199.87	3153.08	4760.44	5921.12	942.874	2293.98	2222.3	2309.44	3557.15	2733.75	1949.57	2438.94	1044.56	3511.25	3069.49	3391.6	4094.36	5671.92
P05186	Alkaline phosphatase, tissue-nonspecific isozyme	ALPL	2	2	684.529	547.808	1253.89		1338.24	271.704	1514.74	198.141	1132.25			644.676	397.213	43.0206	165.649	1886.6		1061.15		1709.86			658.361	754.147	697.459			217.446	869.982			547.635	719.599				122.797	1151.61		820.13	2635.03		1020.64	953.062
P05198	Eukaryotic translation initiation factor 2 subunit 1	EIF2S1	8	8	35617.5	14451.9	13704.6	15700.9	8421.72	47368.7	13055.4	20632.6	22704.5	25097.6	95239	10006.4	12879.7	16365.6	17697.3	17740.4	19901.7	21297.2	62408.3	16807.9	47627.6	67079.6	19958.7	15823.1	27613.2	22457.1	28626.3	20773.8	44604.7	37478.3	37357.9	22695.6	15196.3	24056.9	44448.9	69713.6	21006	19020.6	35824.5	26158.3	28839.4	188435	12595.8	10380.3	18590.6
P05230	Fibroblast growth factor 1	FGF1	3	3	1115.99	1648.78	1764.43	695.557	2491.61			670.026	2553.03	14036.1		2733.04	287.422	267.456	456.15	374.998	377.428	1776.92			11461.7	4219.49	6896.92	2634.4	19049.9		3050.47	125.806	2185.13	2448.84	9768.77	1034.1	17124.9	2186.42	4456.35		1176.39	801.982	3456.08	3740.57	22214.7	3066.73	14751	25132.3	33376.4
P05362	Intercellular adhesion molecule 1	ICAM1	7	7	30640.3	6190.29	8008.47	19343.8	4697.29	17454.6	6628.2	9097.81	13471.2	10036.7	76991.5	5859	10036	11808.6	7014.08	8112.36	9312.47	9314.87	14964.4	25883.7	57093.2	9698.72	16338.5	10824.5	26359.9	3722.58	18412.8	5854.5	24556.6	45933.5	21549.8	7800.29	2444.89	9186.35	4597.8	5955.03	10270	10540.2	4369.49	15506.3	5574.18	12425.3	5130.93	3100.37	6146.31
P05386	60S acidic ribosomal protein P1	RPLP1	6	5	44521	22198.2	21344.6	16169.3	22256.6	29013.1	22925.1	28274.8	46122.2	32564.3	124840	17189.7	11839.8	15537.2	19525.8	27232.6	30690.1	18584.5	108825	58809.4	36371.7	16758.7	59714	34623.7	51588.2	17682.2	74480	40685.1	131943	107467	122259	85074.9	28558.7	125639	48617.3	57826.3	20004.9	19816.9	29349.7	19640.9	4775.22	22759.9	17242.4	6204.4	57540
P05387	60S acidic ribosomal protein P2	RPLP2	6	6	223325	74957.5	108535	117536	116938	222315	107009	71703.9	169854	92883.1	2.73026e+06	137166	93058.4	77632.3	168197	116847	130134	100160	760091	155978	127141	197892	124053	134661	244108	185978	286176	231631	572712	374241	696455	384231	194522	380903	391075	379795	130110	89671.6	228325	161280	98619.1	331447	78890.4	172765	381071
P05388	60S acidic ribosomal protein P0	RPLP0	9	2	44604.3	36666	52718.3	69163.5	43722.4	123335	54649.1	43884.8	139113	56136.9	333272	32202.4	38416	57593.8	79956.6	44122.2	83757.1	41303.3	67068.6	57453.7	118575	87628.2	84523.3	35026	138814	138436	112450	63093.9	190401	91275.7	149238	104939	51272.1	61824.1	164006	170917	39375.2	43963.4	99813.7	93520.4	80686.9	125028	25955.1	44799.5	168331
P05408	Neuroendocrine protein 7B2	SCG5	3	3		1179.44	452.23	681.557	15180.6							1266.78				802.166	892.273	7531.63						3820.38	8670.73			972.524					1302.62	822.276			1		247.831				2237.46	6590.5	8168.68
P05413	Fatty acid-binding protein, heart	FABP3	8	8	12355.6	6636.84	24948	7113.69	76628.7	3499.99	16169	4475.41	12530.8	94099.6	9219.47	48583.3	7063.67	3979.63	4871.32	19955.5	3544.96	99052	1798.1	2661.06	40849	13468	3247.09	34346.2	109389	11328.3	24127.6	7321.64	10418.3	17717.4	10498.2	1893.21	31379.7	34738.3	56553.5	12707.8	4208.96	12955.6	10914.5	7786.04	32063.4	19717.9	20816.5	65250	190354
P05452	Tetranectin	CLEC3B	2	2										1				2063.5												22691.6	5115.44	308.952		565.881			691.436	173.614	58579.5	13342.9	92.1751	6175.03	954.675	6085.32	1613.17	43186.8	877.986	271.803
P05455	Lupus La protein	SSB	14	14	2717.94	4344.18	4055.11	2875.81	844.654	9228.45	3723.93	4275.51	3608.63	1439.47	6588.69	3468.59	3638.33	3188.49	4290.21	2356.33	4953.82	3568.42	5892.64	4128.86	2377.23	749.951	3507.79	2822.85	10016.8	9791.71	3294.45	6507.64	9214.81	6110.42	10341.1	7624.01	3487.69	4611.19	10050.4	5478.55	8238.15	4163.37	8098.14	7550.96	3157.94	10640.6	2893.5	2208.19	14971.8
P05543	Thyroxine-binding globulin	SERPINA7	1	1	3735.48						365.288					1384.32	498.92			1331.02		1003.75															896.322								2093.83
P05546	Heparin cofactor 2	SERPIND1	8	8	22960.3	612.822	717.39	3197.36	4152.61	11941.4	2263.86	1474.44	2641.77	1498.65		3663.13	2160.11	2816.9	2634.84	4574.31	691.992	2254.84		295.588	7238.37	4968.52	2507.28	3652.92	4571.07	7516.87	1910.82	2109.54	2079.67	2966.26	3113.68	1603.49	1331.01	2115.88	12919.7	25799.8	2332.15	2831.52	1105.45	906.285	8871.62	57179.1	3720.74	2023.03
P05556	Integrin beta-1	ITGB1	5	5	16005.2	8533.69	9955.87	8075.89	7956.28	6686.83	7240.06	13664.3	14729.1	6151.66	51913.5	4917.02	3845.42	11735	9443.96	8815.19	9727.43	11830.5	13644.9	6741.66	15542.9	16908.9	8716.47	7014.75	5141.11		5899.49	2747.15	4155.44	3197.89	3828.74	2230.52	1024.08	3829.27	8099.82	4489.22	2172.97	1951.21	2405.35	5059.35	7299.25	6554.51	2860.8	5647.24	1953.08
P05771	Protein kinase C beta type	PRKCB	8	7	1260.21	899.848	1637.42	305.243	6893.63	2582.11	880.749	1879.98	3642.38	115.267	49201.4	492.08	929.589	364.025	373.096	2524.33	1620.87	22140.7	2080.38	1748.51	5836.6	468.079	1138.74	1029.48	3790.96	3876.79	1525.18	1453.23	2832.51	2746.47	6281.84	601.379	1584.61	2448.84	3524.37	5108	2920.02	2555.34	2185.11	3319.67	5007.57	67341.9	4428.53	5115.38	9719.78
P05783	Keratin, type I cytoskeletal 18	KRT18	3	3						1	392.668	4.95961	11528.6			3358.48	1543.22	1		524.354		1				23369.2	12.3537										1		1596.97	3.79696	1	1			1.73288			1
P05787	Keratin, type II cytoskeletal 8	KRT8	3	3		840.433	2925.63					867.06			13406.1			1683.6			971.532					65228.9			17454.7					3537.08		3611.04	11400.2		21334.3	1523.69	527.913	7130.78				6581.13	1030.37	6579.01	2050.66
P05813	Beta-crystallin A3	CRYBA1	1	1	80476.4	44054	33050.3	43851.7	103986	108179	50180.2	88870.8	5773.85	263460	2918307	18488.9	11617.1	27573.2	12768.8	18017.3	13926	19529.7	61861.5	52798.4	455136	679519	43571.5	32743.9	226769	194715	116707	47082.8	82794.2	65833.9	482255	68616.9	49517.7	92474.2	787775	1.12419e+06	59418.3	40264.7	15847.8	144561	245253	297578	42929.8	125382	12921.7
P05937	Calbindin	CALB1	6	6					741.87						1703.03	243.675						144.865		517.499		28239.6		2029.25									1					1			1		126.355	1211.33	3395.66
P05976	Myosin light chain 1/3, skeletal muscle isoform	MYL1	2	2	7603.45						589.986					797.134		116938						8430.39	1042.82	1754.18			332796	1.25885e+06	450119	30741.7	340234	215035	1.6765e+06	33072.7	183712	318274	2.68034e+06	1.09726e+06	206972	200196	263887	389655	245894	5.34962e+06	396898	438043	535731
P05997	Collagen alpha-2(V) chain	COL5A2	1	1																							182.372	384.246
P06132	Uroporphyrinogen decarboxylase	UROD	5	5	3332.73	1910.23	3685.46	3354.35	5721.23	6746.61	4575.14	2471.87	6907.68	1750.07	9273.07	3765.79	5272.86	2808.76	2867.45	3449.71	4714.21	2673.11	12126.5	2861.8	2491.51	1274.26	4212.96	6145.5	498.232	4642.21	3206.32	2040.63	4186.9	1765.99	2467.69	3048.44	2638.97	2987.64		2813.44	1382.96	685.255	1376.4	742.215	1576.03	789.65	1538.16	3174.73	20020
P06239	Tyrosine-protein kinase Lck	LCK	9	9		1356.59	2242.89				2113.94	121.549				1271.57	3010.84	6261.71	1136.48		436.252	1084.89		938.833			811.973	2155.01			4773.82	1066.15	1	701		288.641		10385.6			5937.34	18801.6	8395.1	31498.3		59375.3	5173.25		77697.8
P06241	Tyrosine-protein kinase Fyn	FYN	2	2		273.941			1663.82		1336.66						1590					315.448		374.631			661.951		2380.26		872.141	1411.53					987.461	743.701	8759.1			23.6766					913.741	460.704
P06280	Alpha-galactosidase A	GLA	3	3	1837.91	1102.2	2598.75	2910.07		1966.45	1609.74	1574.16	5194.08			7001.59	4997.16	2711	5920.01	1079.72	2131.51	2312.15	3583.01	1648.63			1459.24	6176.91	3477.1	9674.84	6307.04	3825.41	4714.11	6110.75	5083.59	6318.9	6702.46	8480.43	5427.8	6568.65	1704	4985.74	2571.84				2034.82	2512.95	4204.58
P06340	HLA class II histocompatibility antigen, DO alpha chain	HLA-DOA	2	2	6214.23	800.117	2150.2	5644.6	601.891		6835.66	3110.3				1052.42	5353.98	4653.69	3332.47	1466.65	4470.68	3184.17		2047.42		2527.31	4651.27	9425.8				4479.01	27605.5	6571.16		17813.9	801.954	12876		2212.63	7600.09	12071.8	7149.06				720.887	1772.87
P06396	Gelsolin	GSN	21	21	15644.4	8511.19	10786.2	12301.2	8692.72	13901.3	8864.42	10415.4	27834	36354.7	44469.5	6120.3	8868.98	10414.5	6647.77	8200.21	8232.61	32387.6	2023.69	9480.69	22783.5	45117	9051.03	18810.6	11571.9	12920.5	6641.05	4269.94	13871.6	11439.3	20611.3	6179.7	11718.8	6435.6	40719	21899.4	5786.6	5368.39	5668.57	13354.2	34620.4	33186.7	12665.5	16464.9	20751.7
P06400	Retinoblastoma-associated protein	RB1	10	10	242.48	650.412	895.784	947.675		3533.44	1231.65	790.203	2021.62			943.07	849.052	1353.55	6272.37	1518.44	1933.35	2482.58	6417.96	513.157			4847.83				10627.2	1050.24	676.447	1156.71		1058.86	1245.64	598.44			1050.26	2321.97	2033.79				592.318
P06454	Prothymosin alpha	PTMA	5	5	1736.33	950.952	8299.45	5071.81	1	10087.3	3989.25	361.522	74943	2813.5		5152.54	11696	3147.62	11377.2	7587.78	6314.48	62988.9	27298.1	1579.01		664.06	16775.2	2744.4	5411.18	3398.72	8005.43	4029.33	11465.5	7523.92	18192.6	8412.62	3900.21	19505.1	14717.2	2702.35	1734.48	1146.32	3780.84	1453.79	818.242	18679.5	716.606	371.281	5246.69
P06493	Cyclin-dependent kinase 1	CDK1	8	8	10061	12118.4	23466.9	13660.7	1496.69	21295.9	5896.66	8416.93	5931.39	3547.59	150594	13160.5	15184.4	26615	22146	10321.3	26526.3	29853.1	20054.5	23361.9		18230.5	28902.1	2359.41	6153.32	12948.1	11229.8	10050.1	15391.7	8201.25	8607.05	10266.1	6854.68	13633.6	10993.8	35650.8	5746.1	4196.54	12893.1	9728.45	8405.74	13316.8	5762.02	1822.61	2135.19
P06576	ATP synthase subunit beta, mitochondrial	ATP5F1B	26	26	75144.9	48994.3	81415.3	69279.5	192445	89195.5	52820.9	81108.3	102571	189557	2.26974e+06	54158.5	49671.4	59807	41060.2	69060.6	76701.2	278007	65554.7	82567	588832	294963	91371.1	58771	168766	125558	82847.5	74975.7	117347	113714	94819.3	56270.6	49219.3	71454.2	194292	205466	83152	79905.3	105820	101778	118973	221423	73489.4	94343.3	165117
P06681	Complement C2	C2	5	5	5424.96	238.323	1799.85	1080.31	1162.51	847.927	2846.83	450.909		1767.26		2103.5	634.586	928.36	123.765	1422.1	65.5906	2428.68		624.109	1.3646		169.599	1318.34	3881.43	5919.31	2326.32	422.108	938.155	3577.14	1414.09	893.09	1014.65	918.543	3808.49	2390.75	1421.45	1379.77	725.269	1493.28	1896.4	1085.13	1487.43
P06702	Protein S100-A9	S100A9	11	11	213662	35474	13224.5	7540.6	16265.6	46589.3	33613.2	22100.4	13881.7	81900.4	1.1156e+06	13624.5	9790.11	7297.15	18141.3	29610.9	7218.66	71163.9	36767.4	24358.7	63487	308818	21401.7	22151.6	57033.4	30259.5	34474.4	9166.69	36924.4	34386.5	241191	23495.3	17045.8	45593.6	188781	303177	26557.4	29895.2	10298.5	89804	98476.3	261625	10410	33200	72548
P06703	Protein S100-A6	S100A6	5	5	5526.71	805.721	2883.18	1477.29	2703.22	474.649	3971.57	1165.81	2728.78	6663.67		1657.43	2587.87	589.505	996.292	1757.72	445.087	8635.06	2839.13	650.443	3812.09	5252.3	2182.2	1870.37	13562.5	6174.74	2428.03	1005.23	8568.49	13195.1	61589.5	2210.03	2373.01	6152.46	7138.96	12000.2	1395.14	806.494	1071.54	2972.72	1759.48	354118	1330.68	635.261	999.35
P06727	Apolipoprotein A-IV	APOA4	15	15	11412.3	1084.9	2544.81	4289.03	8928.89	4936.27	3229.45	1269.95	11277.6	10374.9		3202.38	2255.25	2133.08	3108.77	4486.02	3288.18	4053.39	3405.54	1957.39	14055	18426.9	6197.68	5018.46	1601.42	9864.56	2355.12	975.991	1	2971.85	8566.26	1647.53	1990.8	1294.41	2825.47	7276.72	1040.51	638.631	2365.72	2506.85	4088.43	3294.71	2102.75	1983.83	1852.56
P06729	T-cell surface antigen CD2	CD2	1	1												559.65	431		445.831	414.99	505.06	892.13	1666.16	801.658			916.988	1711.03	2342.2	1000.42	2404.67	1282.71	3862.12	2161.82		1236.16	1280.42	2422.33			1279.42	1424.67	1088.17				1343.73	2791.12	16063.4
P06730	Eukaryotic translation initiation factor 4E	EIF4E	7	7	4126.97	4356.05	5940.16	4632.13	4167.69	6618.7	5112.49	2494.78	4445.53	4285.51	13.724	5104.02	4961.93	5541.13	7547.57	4089.01	7274.76	4672.19	7425.72	2859.95	8457.32	1.42911	5729.16	2736.42	3495.14	2913.57	4086.17	4080.17	3580.86	3028.89	4112.48	4369.01	2133.11	8102.13	3227.72	4237.4	2504.49	3408.89	1114.57	2487.74	2121.46	5900.17	2168.27	4862.75	1404
P06731	Carcinoembryonic antigen-related cell adhesion molecule 5	CEACAM5	2	2	2004.71	347.819		1150.23			285.317	434.995	599.766	1242.17		280.695		358.064		332.728		811.84	529.583	281.025		10687.9		269.163			199.084	47.0132						346.328	6166.43	1675.64	59.708	613.753		408.331	1.30769		211.297	352.255	829.715
P06732	Creatine kinase M-type	CKM	16	15	978.494	7578.89	464.79	831.725	17939.8	1243	402.434	2048.05	322.067	214357	818800	2541.98	269.127	116747	2645.05	469.402	722.428	3905.6	665.297	1174.4	176914	162877	473.698	2308.66	62923.2	300392	117334	17734.4	42367.9	57840.7	236918	19778.9	31696.1	26339.5	1.11345e+06	604223	9997.96	46837	70859.9	120315	121170	999214	39628.4	60783	256171
P06733	Alpha-enolase	ENO1	23	23	141325	122571	116940	127031	194476	334309	146560	112376	206668	365131	1.26318e+06	111808	124995	112143	156843	113103	181355	139873	260141	148952	481562	415158	191077	129043	255141	184690	189396	109610	170471	262223	406850	188360	139743	173415	566505	456967	98659	120953	111021	227552	330389	424077	91219.5	143840	433097
P06737	Glycogen phosphorylase, liver form	PYGL	9	9	2086.29	1916.36	557.959	193.134	1106.9	2822.01	2031.36	678.76		2272.53	23.2796	911.942	275.08	426.969	294.133	1920.96	136.688	2053.66		1705.25	1760.21	2142.92	734.196	1044.96	1115.01	2977.64	545.402	582.214	872.019	657.282	2823.45		1336.09	1199.94	2148.89	1795.99	835.963	1061.79	201.332	2326.18	1474.23	6219.1	1311.28	764.909
P06744	Glucose-6-phosphate isomerase	GPI	21	20	6831.17	8373.59	9589.22	5523.92	28063	24336.1	8464.06	8634.68	11776.1	16704	39116.2	6230.99	5581.95	6983.05	11864.8	6338.56	14189.8	45575.7	7407.08	8330.49	31079.9	8327.14	9031.94	12401.6	23742	26609.4	13195.2	5622.14	11928.8	9577.5	13716.9	6373.6	11837.9	8715.82	59861.2	27984.5	5344.69	6376.83	8970.09	14392.9	12868.1	41832.8	11353.4	14568.3	23884.7
P06748	Nucleophosmin	NPM1	10	10	51199.2	33662.3	25727.8	23571.6	6395.35	34828.5	13613.4	39002.4	88356.5	45895.6	262430	35961.5	27795.7	51113.7	52952.5	37178.2	60919.1	16403.3	123571	56768.6	95077.7	97870.5	57925.4	23550.4	27224	48201	67125.1	41175	111962	53873.6	106878	51431.3	34758.3	36826.1	305344	189308	63684.4	41085.4	85793.3	101099	50160.4	138209	41937.2	25260.4	143120
P06753	Tropomyosin alpha-3 chain	TPM3	6	6	161377	81146.5	97130.1	117659	185511	309235	202457	154292	191745	196033	934387	84934.7	92697.4	33191.9	125100	105359	114321	151968	280804	290076	336728	230553	155704	236180	64373.9	92801.4	70951.4	62666.6	78804.5	102636	107570	59294.2	39949	58815.9	274545	31120.9	119045	40754.7	57893.3	128901	147383	1.15038e+06	38660.8	61593.3	70492.8
P06756	Integrin alpha-V	ITGAV	5	5	5109.34	1409.89	2009.68	1719.47	4207.49		1863.93	2627	5568.33	6194.68		2197.02	1327.05	1672.34	1675.98	2115.27	5440.93	4026		3074.23	3580.61	5223.08	2815.46	5214.13	2028.44	1437.78	420.213	1341.27	2392.91	673.14				1089.2			11113.4	340.696			1129.83	2478.22	1404.35	2302.13	6755.72
P06850	Corticoliberin	CRH	2	2					3906.33							181.605										24169.7											92.5562											2162.53	879.543
P06865	Beta-hexosaminidase subunit alpha	HEXA	10	10	10004.8	3005.86	4060	5384.04	5725.59	4767.31	10042.3	4289.9	8426.62	8423.19		11625.8	6631.75	1544.38	8182.87	11635.6	3711.07	5063.46	15979.6	6898.95	2355.58	6987.51	5265.17	15436.2	5008.19	26039.1	6511.62	4142.12	9555.38	12849.8	29167.1	6135.36	6523.2	6486.23	37572.5	21352.5	2401.95	9575.88	3500.34	13515.4	8747.17	38528.6	2269.35	4321.41	6752.08
P07093	Glia-derived nexin	SERPINE2	3	3	2854.95	866.616	3305.99	2619.3	3920.62		769.666	1862.56	8845.66		10909	2177.55	1925.81	1377.44	114.209	3024.28	1054.5	5107.67			7681.4		2548.79	2556.88	2368.62		2468.69	1210.21	1668.1	3124.92	5083.99	849.883	328.614	555.9		5800.03	1811.7	668.656	5.77165	535.908		3446.99	468.764	4170.55	10021.8
P07099	Epoxide hydrolase 1	EPHX1	9	9	9638.65	4148.84	4800.22	3636.34	10639.7	16359.1	8807.64	15659	13271.3	22522.7	220226	6860.25	5403.19	6491.59	3875.51	12629	4072.37	12475.4	23435.9	9377.85	41900.6	37047.1	11263.7	12695.1	23167.6	7055.6	13315.2	9611.51	7986.43	22851.2	35091.7	2191.31	8262.6	4793.21	35509.1	8358.93	8480.22	12882.9	5690.73	13813.1	17937.6	27384.2	17278.6	19168.5	20335.6
P07108	Acyl-CoA-binding protein	DBI	5	5	11812.2	4895.67	7256.97	2525.3	10794.6	27425.4	10218	7039.16	15800.7	50036.2	107199	11314.2	8750.74	7471.46	7300.95	8122.53	9953.37	7540.47	33477.2	5124.31	33689.6	46193.9	7017.72	6881.27	35746.5	26265	28601.4	8096	17715.8	32099.4	64552.9	17935.9	21271.9	30047.4	95136.6	23230.5	3507.37	9282.37	8190.76	25670	48661.8	31176.4	10500.7	25671.3	99952.5
P07195	L-lactate dehydrogenase B chain	LDHB	21	19	12971.7	27529.2	39587.8	30902.2	80116.6	44951.6	30065.8	18823.7	39620.4	48958	162893	26656.3	21180.5	17507.4	37072.7	17117.5	30714.7	108132	24654.8	26345.7	113809	74310.7	26967.5	28318.5	51213.2	50659	37677.5	16539.1	48259.9	36572	45317	39195.3	31183.6	29377.9	107842	72319	14554.3	26011.2	17159.8	40366.3	53510.7	72190.5	29695.7	40209.4	92271.8
P07196	Neurofilament light polypeptide	NEFL	25	25	5856.41	14550.3	5443.56	6966.04	22681	409.932	3392.93	12560.1	28091.7	130757	462623	3130.97	2155.98	1026.11	4970.9	10284.7	9507.84	14821.7	1280.64	7559.43	94941.6	348738	11988.1	7301	20608.1	32050.2	60.0313	3550.04	998.043	2239.75	8199.56	1006.27	12933.8	4697.89	4900.09	31054.5	9625.54	10114.7	14603.4	27903.2	83969.7	84700.3	26855.3	30363.7	51359.7
P07197	Neurofilament medium polypeptide	NEFM	18	18	9051.79	18779.6	8075.1	11934.4	31056.1	759.909	239.379	14706.9	26660	189368	748221	3316.23	2407.45	1627.31	8176.19	20695.8	10046.7	38768.7	192.107	6573.11	82618.1	515252	12384.9	10930.3	20671.1	47102.2	128.208	6944.52	663.123	694.436	7964.13	1392.15	30793.6	5626.42	16754.8	46025.4	21451.5	16970.7	28344.3	36427	173460	201836	70421.3	81428.7	72970.6
P07199	Major centromere autoantigen B	CENPB	1	1	10193.8		3975.28	5670.01		5469.45	4388.76		11455.8			5527.49	4971.92	6320.35	1342.11	4108.66	3153.62		9297	9709.79			7336.68	10485.5				4140.68									1273.34
P07203	Glutathione peroxidase 1	GPX1	11	11	28301.3	15579.5	9394.05	16299.9	21264.8	42053	39545.8	17774.8	32125.1	41939.6	368562	26697.5	19357.4	11405.3	22336.2	36376.5	14793.6	37700	51492.5	29598.5	52583.6	30133.8	35218.6	59444.4	25800.5	19401.7	8257.65	9696.42	30558.5	37092.3	80690.1	12346.3	15573.5	16531	52231.6	22457.3	6516.41	7175.51	4452.05	32903.3	27633.5	37568.3	7310.34	15940.8	27735.9
P07205	Phosphoglycerate kinase 2	PGK2	1	1		1052.55	711.115	1068.79	1032.9	879.34	424.348	223.828				627.934	421.673		1142.93	343.482				1077.15			465.175															404.689	218.681				309.876
P07225	Vitamin K-dependent protein S	PROS1	4	4	3237.79	300.38		1248.07		1638.94		1154.95	2173.74			699.687		880.533		1500.94	881.394			170.672			993.441			2018.77	367.322	655.226	125.849					444.232		898.922	625.971		510.995		374.617		846.414
P07237	Protein disulfide-isomerase	P4HB	20	20	32914.6	13737.2	13744.9	20041.3	14836.2	33321.2	42147.6	34527.9	38576.4	13135.9	80462.4	12041.3	18028.2	21745.2	16465.8	21587.1	29834.7	17796.2	17820	50512.8	27788.1	34565.1	22648.9	27265.6	41654.4	95540.4	41621.3	28132.1	40722.4	57169	98655.8	39553.8	14573.1	19080.9	178995	126196	18241	34839.7	23462.2	65391.3	44108.7	116984	10197.8	13052.9	46126.2
P07311	Acylphosphatase-1	ACYP1	2	2	4843.39	3379.47	5482.78	5328.51	11746.9	10039.7	1851.27	2502.7	8160.65	10551.5	40524.9	5023.91	5593.76	14042.6	8006.12	7058.4		8282.85	7602.12	1393.07	10524.1	2731.45	8997.04	5234	16312.4	10024.6	13581.3	5137.21	6490.41	3570.62	11374.4	4662.37	5069.44	14238.4	3360.01	10640.9	8472.26	1961.95	3103.41	3777.86	2993.23	6076.7	6515.07	18422.7	45111
P07332	Tyrosine-protein kinase Fes/Fps	FES	2	2	933.819	661.583	354.698	1378.26		372.04	1889.93	963.915				381.739	158.178		407.158	969.07		1729.26		1200.25			865.22	567.051	273.833	1602.75		203.808	91.044	1321.41		385.921	171.186	313.407			440.522	1397.46		2495.71	772.126
P07333	Macrophage colony-stimulating factor 1 receptor	CSF1R	1	1	1458.23						1820.09					253.595				496.792								5771.99						376.435			569.897
P07339	Cathepsin D	CTSD	17	17	43468.9	37522.4	40392.7	19422.3	52378.6	62052.7	41846.9	67464.4	139265	105654	1.1276e+06	42251.1	44963.3	33928.3	52029.2	38907	21940.9	197348	59081.2	120151	222823	294704	76951.4	77114.3	143880	116839	80726.8	49176.9	126645	137507	331742	80342.2	59520.2	53459.9	617700	370457	36062.9	46474.3	36430.6	141819	140339	268044	26245	38738.2	173515
P07355	Annexin A2	ANXA2	25	9	22059.3	15234.7	8798.86	19430.1	2523.1	18131.6	20364.5	36500.8	30157.4	27471.5	153784	8413.06	10927.8	16094.1	10807	18012.5	16952.8	12612.6	26556.6	26235.8	46219.9	124144	14227.5	19639.3	30379.5	56340.7	26515.4	23673.7	48849.4	58081.3	97294.3	21476.8	12634.1	22927.6	211241	109826	30850.6	42066.5	29551.7	59076.5	48309.3	98267.9	15373.2	15743.3	42575.2
P07357	Complement component C8 alpha chain	C8A	2	2	5112.86	703.398	847.722	3603.8	1708.59	407.92	1488.31	1911.52				5036.69	1174.59	1447.16	600.491	4462.39	428.912				2109.51		770.237	4973.09	774.315	12451.2		774.809	3432.22	998.554	17584.1	1337.09	406.494	832.835		3144.25	2526.86	650.101	3451.35	895.347	11965.4		4268	483.885
P07358	Complement component C8 beta chain	C8B	2	2	17690	298.942	90.9933	4868.56	1931.59		1157.47	1230.01	345.771			1296.89	1310.28	2306.59	83.0895	8444.76					1437.29		352.611			7704.84	1	181.114		1075.87		583.269	1352.05	811.894		2925.68	2255.45	1332.7	2605.52		9182.96		2460.12
P07359	Platelet glycoprotein Ib alpha chain	GP1BA	5	5	9253.5	4375.78	2716.22	4039.33	9895.6	23298.3	5180.95	530.701	3612.71	8552.89		3655.42	3286.74	5197.46	5012.71	2318.55	4047.13	6533.7		4855.92			4672.12	3020.22	11823.2	14661.1	17707.3	2417.95	9732.24	7532.86	5089.2	5085.64	9259.9			18192.9	7446.64			4966.17	2050.18		650.026	2438.01	2137.55
P07360	Complement component C8 gamma chain	C8G	2	2	7490.98	218.144		1804.39	1339.03		756.612					325.863	199.434	371.984		3443.5		2912.56	1				30.6843		3534.57	4212.25	457.993	378.055	3066.15	2592.71	2218.43	723.844	825.14	840.627	3244.9	3185.1	1225.15		1103.71	482.427	7300.99		1972.11	756.115
P07384	Calpain-1 catalytic subunit	CAPN1	20	20	14229.4	8472.6	12739.4	10836.4	16345.7	18670.5	21180.1	9930.3	11322.5	31807	90960.8	8576.81	14830.5	17235	7727.32	11668.3	9114.34	31078.4	17641.3	9354.14	45129.1	37448.7	15476.2	20453.1	17544.1	23527.2	14096.1	6454.44	18279.1	22735.1	21275.2	9855.25	9767.5	11513	40164.8	35598.8	8015.31	10319	7650.2	15121.9	22752.5	25021.7	7584.4	10522	12230.1
P07437	Tubulin beta chain	TUBB	4	4	50858.9	53081.3	60195.3	36559.2	209103	78365.3	51204.2	60288.9	62369.3	176913	187618	51036.5	81103.1	103620	118331	63478	75593.3	57856.4	149340	111949	266732	148236	96923	70025.4	107607	47351.7	80623.3	96339.1	128591	66640.1	105009	96745.2	117224	100719	120059	106965	49653.4	46547.1	60737.3	55264.2	73529.2	111451	75178.7	123532	200266
P07451	Carbonic anhydrase 3	CA3	5	5				1				1				1		3119.38	1	2163.24							1	947.668	13354.5	16718.9	13369.9	2517.01	8071.91	9384.12	21262.3	1452.9	1226.69	1211.11	247877	51283.9	1806.35	5177.08	13658.9	28845.7	4923.36	132595	3911.78	3625.88	17261.6
P07477	Trypsin-1	PRSS1	2	1	28470.6	136972	117029	118997	270951	194273	98267.6	302459	197388	1259600	3323028	62692.8	54608.1	207991	67867.3	535538	102679	54117.2	265972	44307.6	529972	422903	193440	156561	55969.5	450392	400288	212896	971820	54867.5	186957	336050	167868	244070	3.11748e+06	3.02593e+06	195439	302700	280225	1.00001e+06	939520	247802	227722	520753	878661
P07585	Decorin	DCN	6	6	4949.9	346.077					3633.67	12129.2	11706.4			3051.38	2189.49	27300.9	828.661	11366.5		928.064	7307.58	8176.71		61448.6	1988.29	15821.3	2799.78	36133.5	4727.92	4765.16	4016.46	2036.49	4252.33	1247.03	2572.94		41477.8	18519.2	1452.91	7507.03	4102.02	10474	2391.84	31011.5	3891.21	2870.23
P07602	Prosaposin	PSAP	9	9	80217.5	22030.7	23756.1	21016.2	57033.6	36309.2	41891	56624.4	85216.6	90214.2	697547	58472.1	25715.9	23278.5	39438.3	30612.9	11909.1	147920	116257	63795.4	230199	173935	24717.6	228804	93640.1	65636	56172.4	47707.9	76319.3	101737	763384	95616.1	116194	120576	280054	176810	26604.8	45661.5	33974.9	89210	67178	235036	67721.7	224653	930575
P07686	Beta-hexosaminidase subunit beta	HEXB	12	12	8154.55	4048.72	3216.27	3472.57	2819.64	5597.13	4554.02	4598.12	7333.38	4963.11	9.05934	7510.97	2616.59	1073.49	5927.81	3799.06	2297.02	8313.24	6263.5	5713.34	5649.1	11973.7	2719.25	11434	4898.02	7130.17	4334.69	3973.67	6158.09	7265.23	11838.1	4979.79	7538.21	5383.18	19571.5	12487.6	919.435	9291.1	6997.73	11495	6216.38	9623.2	2821.55	3541.25	10398
P07711	Procathepsin L	CTSL	3	3	2385.13	2388.53	1232.76	849.425	15045.3	5902.89	3658.48	837.433		2422.97		2865.06	1948.01	867.752	4131.98	2773.84	2055.5	4197.06	2583.23	4957.25			3176.54	6283.57			647.863	748.705	458.941	1316.79	4184.05	1243.58	452.616	502.262			448.209	442.249		547.775			2719.82
P07737	Profilin-1	PFN1	11	11	134389	71560	84556.3	61534.5	76579.4	237178	157140	112774	176520	234688	602329	103967	80308.9	132253	149125	131313	213442	118175	372911	240074	177562	256293	159177	237853	231618	137140	345716	205520	364042	359036	753880	379536	158966	295522	471400	353425	110600	119041	116111	290201	173432	313182	69019.5	116709	266888
P07738	Bisphosphoglycerate mutase	BPGM	7	7	5131.58	915.677	776.625	565.671	3737.78	4217.82	3814.76	384.993	1414.78			1006.13	482.209	713.52	631.567	1416.31	2110.38	2484.39	1216.09	1610.47			1066	5844.46		17001.4	443.194	1932.08	373.046	104.828	4215.19	326.598	641.287		3623.89	3401.46	1044.27	408.89	168.365	2742.32	9455.05		659.452	2291.23	914.385
P07741	Adenine phosphoribosyltransferase	APRT	10	10	59690.1	15750.1	63931.4	34478.1	24267.8	88296	66328.3	14434.6	45496.6	38312.8	59395.8	31153.9	44484.8	29132.4	42683.8	37433.5	32621.3	29691.5	137468	23154.2	49098.8	67306.1	25223.6	46178.8	41051.2	41839.1	29139.8	17054.5	81846.3	89878.6	219328	52381.3	27517.9	58901	95680.4	78537	13214.5	15276	50588	51649.1	37204.9	45102.8	15434.9	31114.9	98649.9
P07766	T-cell surface glycoprotein CD3 epsilon chain	CD3E	2	2	2671.51	773.068					2624.99	120.818				2060.78	2176.42		1423.78	1063.67			954.71	6423.33			747.439	7728			4073.07	208.454	800.889	7526.58			444.435							1218.79
P07814	Bifunctional glutamate/proline--tRNA ligase	EPRS1	20	20	2898.52	3896.16	5625.66	4325.62	2111.48	3883.4	3462.1	4346.47	7956.79	666.392	70991	3039.2	3217.89	4696.35	4842.41	2872.9	7825.57	7637.42	8109.26	3604.09	5526.89	4632.07	6235.74	2230.41	2345.78	6982.3	3942.98	3707.39	5862.53	4743.22	4996.43	4639.25	4296.64	3857.47	4962.4	5068.56	5092.82	4975.5	5431.34	3218.74	2272.54	2708.84	2955.18	1781.02	2724.16
P07858	Cathepsin B	CTSB	8	8	18091.6	8623.03	11062.3	9376.17	7287.83	17603	31538.5	7443.68	27218.9	6225.19	163925	26705.4	13246.7	8698.3	26072.7	18738.7	10036.4	110500	45158.3	20734.8	10483.5	3079.52	8036.01	60877.5	14524	10473.9	15191.9	14475.8	91337.9	40865.2	138535	15512.1	23766.6	27271	29822.7	22906.3	4930.72	4451.8	7949.8	18738.5	16656	13402.5	7812.62	12835.9	20414.1
P07900	Heat shock protein HSP 90-alpha	HSP90AA1	35	19	56068.3	72401.4	68462.4	86791.3	86576.8	202291	91009.6	64698.7	53993.7	79630.5	470126	41758.8	87797.4	66107.4	145817	80529.6	114389	91351.7	82431.4	44934.4	82579.4	103894	59029.4	37506.1	91106.9	93751.4	73429.9	68179.3	119997	77935.4	99777.9	82800.9	70097.3	94415.3	154569	152718	55849.6	47573.3	75144.1	68832.6	87951.4	240624	61741	58723.7	100925
P07902	Galactose-1-phosphate uridylyltransferase	GALT	5	5	2001.05	410.798	1056.69	856.103	635.513	3863.23	3692.1	231.965	1544.66	1887.65	5874.42	1553.31	1927.11	1157.02	1404.13	2389.55	1381.96	8636.29	11652.7	1085.33	43.245		1575.87	2899.95	269.723		734.293	894.191	247.87	2999.3	974.441	914.793	772.136	1282.74			1288.68	455.308	1231.09	370.278	511.948	82.6924	618.086	743.306
P07910	Heterogeneous nuclear ribonucleoproteins C1/C2	HNRNPC	10	8	12699.3	61608	36681.6	20484.1	8757.69	25076.8	15560.1	60833.8	36920.2	80791.1	1.68612e+06	17243.8	29328	72306	26023.3	16694.1	40463.8	8452.77	22806.7	49336.7	66208.6	140358	69959	25066.2	40632.6	53569.5	47199.3	24624.9	19991.3	12670.7	44629.4	26644.8	13015.9	21963.7	96021.2	196825	56366.2	40322.4	69486	49042	37795	89983.5	20900.3	17771.2	31371.6
P07919	Cytochrome b-c1 complex subunit 6, mitochondrial	UQCRH	3	2	23710.7	3257.16	2544.17	4427.67	35923.8	8305.05	7199	1325.84		993.614		7169.19	5554.21	3032.04	10992.8	6631.62	5671.15	24048.1	42017.5	815.303				2089.34	21848.1	16904.1	14856.8	14955.8	21469.6	22502.9	47515.2	13668	22617.9	19554.8	4614.48	472.671	7898.15	2307.32	11942.5	3069.31	11799.3	4926.19	10610.8	76849	59788
P07942	Laminin subunit beta-1	LAMB1	12	12	3262.33	541.253	1778.57	1259.16	709.022	1505.94	3816.36	3674.08	6105.77			1569.11	1731.48	3842.6	764.782	2933.61	916.219	688.661	2447.85	2019.79	2947.53	2670.95	4475.36	6644.31	2887.53	3669.7	1278.95	1711.65	1607.3	3955.1	588.91	1681.22	114.666		31361.7	6302.25	1604.14	2040.7	1709.66	2109.37	1	11269.9	3007.4	510.61	2387.75
P07948	Tyrosine-protein kinase Lyn	LYN	10	10	1907.72	1257.2	2222.23	3204.03	2297.63	1268.33	1540.07	2146.32	4502.03	1451.06		923.391	2570.88	3149.27	2114.5	1932.79	2412.26	5628.81	3032.61	1531.31			2867.03	752.007			1088.9	2270.96	539.463	1370.86	838.281	719.651	814.432	1919.46		2578.31	4014.92	879.233	1607.4	1687.84	1.24112		817.509
P07951	Tropomyosin beta chain	TPM2	2	2											7981.62			21859.8											13284.8	33084.4	4997.51	1314.57	4260.53	12149.8	46312.7	865.926	4644.9	4850.52	249196	80345.1	2631.9	16133.3	5157.02	32365.9	8471.8	315542	14737.8	16773.9	27910.2
P07954	Fumarate hydratase, mitochondrial	FH	9	9	11124.2	4479.89	5996.61	4830.11	24320.5	7417.57	4798.64	8760.71	26001	17583.7	118367	5706.59	5139.19	3972.8	6311.16	4595.7	10911.7	10509.5	12616	10506.2	76722.9	12155.5	7104.58	10123.1	10294.8	7832.87	5508.42	5489.68	10270.5	6912.29	10405	4369.36	5840.1	8150.39	5804.44	6824.52	6857.34	7455.4	9180.9	9410.43	7357.08	15721.3	10865.3	13725.4	33004.1
P07988	Pulmonary surfactant-associated protein B	SFTPB	1	1																								5702.94														1010.94
P07992	DNA excision repair protein ERCC-1	ERCC1	1	1			229.333	514.939								188.306	243.762		206.233		558.627			103.457				5.79241									123.373				425.743		334.89
P07996	Thrombospondin-1	THBS1	8	8	17442	3310.35	2451.09	5497.85	6110.78	14325.4	25109.5	8404.16	9691.52	14101.2		6796.94	12544.5	9663.13	2427.78	13364	2797.27	9203.97	2125.91	4020.93	2715.43	28419	6553.37	24788.7	11602.9	59451.9	17775.2	4777.75	11416.2	10084.3	45802.2	7557.19	1956.03	3918.52	70311.9	91785.6	10990.2	14666.4	3829.89	17754.1	15961.6	54777.3	4727.22	7380.28	16668.4
P08047	Transcription factor Sp1	SP1	1	1	1391	1802.62	1996.19	1741.89		6453.66	441.098	672.635	3869.17		24.5112	2162.69	2899.54	1850.61	3618.22	2555.72	2866.58	308.418	6854.47	768.131			3348.06	2791.02			751.875	686.36	368.729	859.563		596.73		150.047			1229.44	275.369	508.385
P08069	Insulin-like growth factor 1 receptor	IGF1R	1	1	9438.11	4077.74	6265.78	5607.92	18506.9		6206.74	3416.31	3070.99	6231.13		3219.43	3650.29	1673.23	4215.99	6799.23	6767.1	6367.34		4391.45	10086.2	5491.58	4313.37	4521.62	4338.79				3571.55	6585.41	3399.06	4662.14	3870.35	2890.42			2284.44	3605.29	4050.94		3136.33		3689.7	8780.02	8644.51
P08123	Collagen alpha-2(I) chain	COL1A2	14	14	11905.1	4787.18	12451.2	10761.8	12554.3	8038.61	41478.2	33997.8	660981	7604.26	30858.9	44452.1	24387.9	14852.8	11332.5	61080.4	13279.7	22116.1	27893.2	16831.5	16263.4	94292.3	93902.6	81338.2	59576.4	22093.9	10019.3	6621.83	19166.2	9096.59	17031.9	8677.91	2282.4	6604.49	159127	63052.6	4008.76	8838.25	4689.19	9906.5	7969.08	33618.4	1685.99	9568.12	29345.4
P08133	Annexin A6	ANXA6	27	27	123832	23695.6	15298.5	24998.6	69521.4	50191	44724.6	31680.9	60932.1	77830.1	352814	25452.7	24157.9	55595.9	31430	35352.8	19814	59405.3	56554.4	34765.2	126009	115895	24374.3	55757.8	74661.7	68531.5	27033.5	18880.9	46067.8	66027.6	96107.8	38477.8	38741.3	35349.9	95187.7	59517.3	38678.6	33983.3	34826.3	64199.7	78617.4	103208	41098	70041	110688
P08134	Rho-related GTP-binding protein RhoC	RHOC	6	1	2483.75	6250.76	4092	3368.32	16477.7	3396.03	9397.98	5784.93	6283.96	4050.62		5381.64	3295.66	4612.02	5795.84	2710.5	3465.66	3938.46	6785.43	6334.69	10927.3	1336.27	3060.03	6623.2	4392.01	9552.91	5816.93	4175.48	2706.8	5094.04	10264.6	5047.94	7341.52	6005.48	8347.86	2411.56	5262.03	7628.86	7269.72	9720.46	14252.3	16687.7	8446.25	24988.7	27379.6
P08174	Complement decay-accelerating factor	CD55	1	1	781.101	368.763	317.018	20.2211	633.012		736.491	135.667	1			196.145		187.148	148.259	86.3099			268.15				140.859					1				241.569											83.6968	813.95
P08195	4F2 cell-surface antigen heavy chain	SLC3A2	18	18	33701.4	8839.57	19699.5	10957.4	38899.5	14668.5	9809.41	8097.64	21408.3	27548.8	340250	22456.3	7536.37	17466.5	21359.1	10792.1	10597.9	18632.8	20652.1	14497.5	49390.6	46401.7	17094.1	15290.3	20824.9	10032.7	12292.9	10577.8	19488.6	16381.9	32124.6	8726.14	9689.45	12216.1	13398.5	27813	7755.34	5996.55	7260.46	13927	9216.99	18382.5	9493.28	24102.6	57008.7
P08236	Beta-glucuronidase	GUSB	2	2	1531.06	186.129	1141.14	743.781			738.611	494.655				1859.74	695.321	932.39	2118.34	572.049	120.828	569.883						732.602		17221.3	278.121						665.347		5186.31			1863.81				6616.61	237.458
P08237	ATP-dependent 6-phosphofructokinase, muscle type	PFKM	16	16	4637.33	4657.21	4793.68	4137.69	22347.1	8788.89	3761.31	4189.91	21816.3	22444.4	44513.6	4151.96	3448.38	5624.58	3475.57	4189.86	3247.39	8364.82	3721.32	3671.58	29442.2	36623.1	6329.74	9323.12	11708.2	13308.6	3578.99	3687.3	6612.07	10519.8	21446	5591.18	8088.96	5993.5	14495.4	7620.51	3299.11	5688.53	3328.9	9812.18	14978	12314	9115.31	12934.1	16484.3
P08238	Heat shock protein HSP 90-beta	HSP90AB1	18	13	29502	42113.2	33960.4	53377.1	25206.8	84578.9	50286.3	36665.1	30021.5	34232.1	126318	31416.1	50046.9	56548	98822.2	48424.9	75904.7	156934	50531	39971.9	43198.8	65886.1	27905.8	18765.5	68202.8	40756.2	13079.2	52007.4	171557	64259	70340.5	77770	48972.3	65590.6	110960	131975	44170.8	35433.9	60398	42619.9	48325.5	220999	28980.6	21871.4	45760.3
P08240	Signal recognition particle receptor subunit alpha	SRPRA	6	6	867.811	1396.3	1764.61	2312.91			1555.69	1822.26	626.777	1282.53	13608.9	825.45	1416.52	2317.41	1780.46	1871.48	1007.33	1252.29		2384.93		3323.71	1785.73		739.629	2391.45	494.626	2336.12		1138.6	944.974	2677.76	559.643	2285.17	2587.72		3506.08	3915.32	5982.02	1099.19	1106.98	4760.24	1944.51	339.072
P08243	Asparagine synthetase [glutamine-hydrolyzing]	ASNS	11	11	6819.95	3263.75	4792.96	5511.87	4560.75	5052.09	2960.56	2062.13	5828.12	4720.15	22800.7	3777.11	7627.7	7957.07	12717	3848.73	2374.92	3026.32	5200.25	4262.79	9316.47	9979.15	4184.89	1386.63	4134.63	6061.65	6414.77	3311.26	5875.21	4889.69		3077.29	2808.17	5023.38	3024.38	9484.83	2162.01	2273.19	1974.04	6937.16	1493.75	9773.47	2522.49	1901.68	4196.59
P08246	Neutrophil elastase	ELANE	3	3	3276.09	418.552		197.282			242.684			749.261		136.243															1			61.0157							58.8131
P08247	Synaptophysin	SYP	4	4	2385.71	547.07	4131.67	420.94	32760.1						27217.7	2671.78	353.787		236.794	247.621	263.569	24336.1			23912.7			1245.25	39589.4	12100.3		7548.53					4890.1	14685			296.404	2132.38	4802.05	1663.35	1827.2	21222.9	11086.6	17406.4	61406.7
P08294	Extracellular superoxide dismutase [Cu-Zn]	SOD3	3	3	10615.5	981.293	7307	3822.58	13693.3	1261.52	9164.5	2250.06	5362.06	18249.3		6613.1	3983.64	3835.71	1752.94	6025.45	855.516	12504.6	8172.63	5557.19	133262	42526.2	5380.53	11894.1	8993.08	3966.78	5152.54	3573.26	3584.76	3425.62	11010.3	1038.59	2734.58	2647.14	16164.9	4334.29		4727.76	1895.64		1354.31	160165	2811.75	9186.97	22538.9
P08311	Cathepsin G	CTSG	5	5	425451	7045.97	1170.04	6017.2	4028.81	25083.2	1329.09	947.724	562.302	6411.44		1610.64	685.568	706.999	1415.26	7321.45	1533	2427.21	795.151			2183.36	2710.92	2372.11	5106.18	41592.8	14292.9	1935.8	1184.23	1164.32	92772.2	2966.57	1286.79	4035.85	31338.5	98490.6	42729.9	850.849	239.004	21394.4	6615.83	1.23523	417.051	3485.96	13951.9
P08397	Porphobilinogen deaminase	HMBS	4	4	4975.53	2699.37	5866.87	3667.62	2044.95	7809.47	3759.47	2283.12	1326.59	2075.15		2505.19	3590.32	3654.37	3229.05	2175.4	5099.31	1603.21	6139.09	3548.13	991.304	1359.24	2550.68	5094	1335.8	16257	5954.59	3456.94	7809.19	3858.95	6223.56	4934.35	2531.28	5232.94	1788.44	6257.42	3491.39	1815.39	2925.28	2408.56	3940.47		1774.72	1636.83	1357.04
P08473	Neprilysin	MME	1	1	470.286												721.781	771.951	205.186
P08493	Matrix Gla protein	MGP	2	2							3931.53	1	992.245		5468.97	466.463	368.529	302.736				3309.64						13727.4
P08514	Integrin alpha-IIb	ITGA2B	13	13	21843	6365.03	5025.38	6400.13	17234.3	25170.6	2335.43	2186.62	4690.38	16420.2		1719.61	2339.3	4540.01	1267.94	2535.58	7974.19	10190.8	2405.35	4810.26		4295.86	7531.61	5640.3	15445.9	21202.2	14766.8	3244.65	639.503		6423.57	1885.3	1055.94	1274.79		41143.5	11424.1	717.537		12881.6	4145.36		1315.39	3513.03	7798.93
P08519	Apolipoprotein(a)	LPA	2	2	38119.5	13829.8		22741.5	2740.39		784.032	8145.49				4148.06		41937.5	2797.82	29192	9446.91	3048.59				78207.4		1816.41		34200.8	4202.99	7094.86		4340.04	14221.5	3895.94	2911.72	5295.95	2948.54	13107.9	18514	8949.77	5183.39	13868.4	49190.1	2337.7	6940.21	5529.84
P08559	Pyruvate dehydrogenase E1 component subunit alpha, somatic form, mitochondrial	PDHA1	11	10	13226.2	20919.4	31667.9	16639.1	121970	14320.7	8700.84	18631.3	46679.2	61845.6	636465	15140.7	17590	15767.7	22300.7	22562.4	24713.8	53365.4	25006	39695.6	308703	95831.3	34219	33210.2	42483.7	18274.1	10022	16812.1	19903.5	12833.8	10398	13346.8	15092.6	19125.6	40515.2	76003.9	20453.6	14409.9	21461.8	17408.5	30061.3	57152	26791.1	55787.5	122171
P08567	Pleckstrin	PLEK	5	5	4203.28	4655.87	2886.76	2504.13	661.618	5831.07	6381.35	5742.92	3161.66	5656.39		2875.35	3503.36	2569.15	1875.98	3738.55	9175.09	5552.13	3586.66	6959.18		2930.98	2546.28	4216.92	5744	8171.65	7180.93	2571.18	5701.52	8320.87	23576.4	6900.74	3847.43	4281.41	5011.02	3104.1	3302.12	4489.16	5425.2	10345.5	2627.98	5562.21	2959.66	1209.07
P08571	Monocyte differentiation antigen CD14	CD14	10	10	24262.2	10632.5	3581.94	5959.05	7083.33	22298.3	22317.2	9947.33	12148	50031	26959.1	15225.7	4156.59	2109.08	5960.63	22166.6	4012.94	22000.5	12907.5	14043.1	34544.8	11516.5	23766.9	26453.6	19183.5	10068.5	5514.66	4690.15	18251.2	43899	44633	2819.4	7526.58	9461.78	39489	2903.51	3767.3	6063.04	1091.39	19278.3	20807.5	19195.8	5055.83	3306.06	3725.12
P08572	Collagen alpha-2(IV) chain	COL4A2	6	6	9702.18	2670.63	3520.21	2253.87	10618.8	7921.19	8500.49	16448.6	25658.9	24982.2	22373.5	8696	2563.09	6871.16	1310.52	3885.29	655.212	8010.02	4996.49	7769.26	53681.3	34434.3	6071.46	38750.5	4735.97	5267.28	1783.98	3743.52	4624.14	4993.16	8730.77	6422.67	1158.51	3921.23	28630.2	39701.7	4157.21	2939.66	3526.86	2879.88	5110.57	12940.5	2689.49	3315.95	9620.58
P08574	Cytochrome c1, heme protein, mitochondrial	CYC1	4	4	920.525	1075.83	1128.44	695.958	3134.36		221.941	2021.33	1342.46	4091.22		777.812	432.695	1094.23	545.677	479.407	964.894	1767.61	2299.83	1196.99	15818.8	12456.5	1105.62	172.084	1122.84	984.481	490.567	1200.15	434.903	442.066		526.799	960.696	1202.4		1528.48	2409.86	2370.34	1159.15	787.518	3607.12	4428.51	2413.89	2995.63	7031.92
P08575	Receptor-type tyrosine-protein phosphatase C	PTPRC	29	29	15719.9	7418.29	7313.25	7900.46	2718.7	17175.1	8287.28	9495.47	17272.6	6519.5	56716.9	3039.3	7256.59	19889	7645.32	6550.79	7194.83	17291.5	13228	13265.7	8537.27	16947.7	9510.54	8204.66	5282.76	11504	17992.9	8619.22	11709.7	18216.8	17543.5	9229.53	5445.55	10123	17420.8	18312.8	12928.4	10537.1	10826.8	10874.6	7332.14	18405.4	4094.56	2848.6	3527.03
P08579	U2 small nuclear ribonucleoprotein B''	SNRPB2	3	3	6168.65	5869.84	6774.23	4083	6736.54	8896.17	4107.88	7231.41	13416.5	3588.67	5273.02	2652.88	4997.69	10284.2	3412.41	2170.44	5657.34	311.817	4203.52	8569.9	2004.56	2622.58	8480.88	3550.85	1	6227.88	6408.25	4152.4	3492.99	4020.35		4589.5	6105.33	1753.71	3485.64	4322.86	5800.47	5555.94	11530.7	4754.3	2376.71	1617.99	2200.8	3388.42	2432.02
P08582	Melanotransferrin	MELTF	2	2	177.946	134.319	118.014	772.363	306.422		128.056	141.549	1084.61	1.2291		215.58	224.425	1162.81	508.736	281.931	322.017	1019.33	341.439	1		3530.76	394.941		1391.22		1	80.2673				1	190.805	80.0328		557.513	1	1					434.981	240.586
P08590	Myosin light chain 3	MYL3	6	6	403.745		23.9376	568.314	256.348		1069.85		2551.37	572.127		1282.25	2827.67	21387.5	1	128.784	216.423	1162.45	1	249.277		1200.86	581.834		26973.6	204885	45549.2	95806.3	20939.6	23668.4	97887.4	192173	13033.9	18490.3	413178	186844	14792.8	11966.8	17522.1	91588.1	12070.5	524996	12409.9	33119.2	53710.8
P08603	Complement factor H	CFH	6	5	12418.3	2830.63	1388.44	4858.66	6109.5	1073.15	1766.48	3212.01	9020.12	5099.44	14105.2	3371.72	1962.73	5964.64	2352.5	5885.42	2437.82	7948.62	1713.27	2045.55	30835.8	13488.1	4302.08	4789.38	3631.15	8368.6	888.446	2032.82	1448.49	1519.59	7086.14	1862.75	1241.8	2598.77	7693.57	12427	4508.36	1388.34	1585.56	3069.96	20834.2	9727.12	3792.9	1506.84	2265.64
P08621	U1 small nuclear ribonucleoprotein 70 kDa	SNRNP70	12	12	2831.43	8861.26	3833.7	3275.67	594.394	8807.5	2127.34	10917.4	8982.77	10511	146264	4038.57	6305.17	7897.14	4469.01	3144.12	6295.71	16917	12867.9	21911.2	8041.15	4914.3	15375.5	9422.47	2600.41	5862.81	7222.15	2783.88	12400.1	7211.76	2799.94	4707.34	2848.89	6056.71	13465.2	20697.8	12614.3	7271.97	12132.6	10158	3900.29	8499.54	3678.11	3766.95	13319.7
P08631	Tyrosine-protein kinase HCK	HCK	5	5	5237.08	1003.69	588.387	1885.2	2066.83	4595.07	2136.79	2643.57	3764.22	295.025		1121.62		469.374	1735.27	2286.74	3263.48		9836.93	1321.52			1700.79	1984.03	614.384		3275.14	1553.9	188.932	3828.71	5640.97	171.259	213.324	3439.13	732.503		6639.32	1078.34	4131.38	601.645		717.072	197.971	380.341
P08637	Low affinity immunoglobulin gamma Fc region receptor III-A	FCGR3A	2	1	71799.1	28228.6	1254.54	7227.87	21984.4	48743	47518	31455.9	9983.72	102674	44284.7	19764.9	15000.9	1597.37	29833.5	28680.4	4396.74	53986.8	6989.06	40327.9	31919.3	14363.4	38862.7	34152.1	16243.8	4456.35	7688.28	9954.45	35356	41134.7	111080	7604.65	24750.4	46207	51232.9		7488.17	32163.4	404.138	47757.5	19845.1	36290.6	17711.9	8490.06	4347.44
P08648	Integrin alpha-5	ITGA5	3	3	20313	5527.46	2426.31	8616.95	879.504	8684.38	4854.4	3393.64	9069.59	4438.49	10187.2	2238.22	3521.94	5651.05	3231.69	5989.88	3256.66	5432.07	5681.75	4563.23		11711.4	3725.98	7942.09	4286.97		556.607	3681.02	9661.88	8750.69	4271	3503.67	1138.57	1000.76	15906.7	2436.22	1963.02	1299.82	4437.81	4684.91	2919.52		1421.79	400.9	394.979
P08670	Vimentin	VIM	56	49	190140	261815	348563	166398	87823	157193	236091	453621	737833	896660	2.87639e+06	366898	217420	307208	142532	260662	113305	731766	156283	427973	1.27154e+06	874889	391438	322550	282433	338876	227117	135852	155107	173713	419726	88479.6	49383.8	108578	890070	723971	157017	461284	108817	310536	386935	865599	88585.2	90666	198194
P08697	Alpha-2-antiplasmin	SERPINF2	9	9	25467.6	4934.71	1415.8	7136.73	4654.23	4938.48	2080.97	1671.5	4728.82	5514.39		4341.33	3050.05	7312.53	3243.52	6480.52	2604.41	1205.55	2228.29	2560.82	7178.21	7373.25	6609.15	14064.5	6040.96	8053.79	956.263	1361.07	2907.56	1525.99	6254.68	1272.97	1221.71	1037.03		6302.04	2217.34	416.979	1099.62	1848.76	6437.04	914.45	1349.66	1504.75	1460.64
P08708	40S ribosomal protein S17	RPS17	6	6	9007.56	13077.6	13458.4	13777.5	3280.19	24168.7	15751.3	12698.2	20792.7	6343.24	22858.3	10273.5	13251	18818.4	22062.8	12135.7	19881.3	10644.8	29453.2	13364.1	5290.43	18940	14477.9	7715.4	15445.2	14214.4	20270.3	17230.3	28524.3	18448	30731.8	27986.1	14756.6	13174.3	5096.78	55928.2	13000.4	9852.01	29597.2	18627.8	12213.7	13084.9	8707.04	9439.43	8599.47
P08727	Keratin, type I cytoskeletal 19	KRT19	7	4	5308.95	7108.46	5270.61	2017.7	7077.38	564.778	918.83	3210.02	2920.41	27664.2	991166	1127.41	605.567	3646.7	4132.95	1633.56	4216.74	732.617		4607.45	20298	279331	8662.35	1729.5	13870.5	5157.42	4110.94	755.424	5715.55	1809.1	10525	6293.67	5282.96	2058.98	132114	259586	7723.48	16539.1	2901.98	23911.2	57352.6	47627.4	3675.91	15124.6	22025.2
P08729	Keratin, type II cytoskeletal 7	KRT7	8	8	3715.43	1.60076	1	189.181	990.974			2493.82	1			413.102	139.082	194.717	39.4965	5100.6	2350.78	28484.5	1	200.477		21030.5		1				160.272	1718.63	201.716		1	412.885			991.196	104.949	204.152	949.756		1017.5	1.34674	125.626		509.851
P08754	Guanine nucleotide-binding protein G(i) subunit alpha-3	GNAI3	3	3		4349.93	3234.11	4427.09			2888.32	6082.18		3756.43		2441.49	2363.66	3668.27	2123.89	4951.62	2272.18	9371.35	10971.2	11979.9	9268.72	3116.89		6003.92			6511.17	5524.41	17173.8	9404.23	12908.8	3757.35	5188.75	4890.51	15867.3		3858.76	4401.41	2541.9	5516.95	5478.71	9179	6809.73	7031.45	11247.6
P08758	Annexin A5	ANXA5	25	25	312896	80017.4	73463.4	112750	80777.5	194950	187387	88404.3	188478	312175	1.1613e+06	124509	100672	64718.4	97564.4	140867	72014.4	198509	326025	122768	338372	306606	143608	242059	316907	191507	152851	64087.6	139563	170931	426540	100079	151732	143813	365868	162872	87930.5	123529	108316	240904	215736	270556	123948	123320	276613
P08779	Keratin, type I cytoskeletal 16	KRT16	11	11	2810.6	6267.39	2023.56	1665.13	9330.85	597.593	2195.38	3614.01	4232.84	24730	1.17813e+06	1027.81	783.249	2450.82	1021.45	417.894	239.727	5976.22	1787.67	4089.34	22264.8	505922	12006.1	1509.08	12186.5	5761.47	5096.34	562.873	2487.83	2127.09	7601.59	3930.23	5417.45	2989.93	91477.7	157252	3111.99	18901.1	2568.01	10242.1	44510.3	88358.2	5584.75	15953.6	18236
P08842	Steryl-sulfatase	STS	2	2	304.434	112.329	254.962	1				104.531				403.913		306.861	1176.15			710.285				3633.32			785.285			157.019		99.9262		278.461	165.808	56.7789			132.414	1226.1	331.847		261.532		644.391
P08865	40S ribosomal protein SA	RPSA	11	11	68134	58248.8	153085	104823	45124.3	106062	97315.5	65986.2	209395	112762	707871	82107.9	90054	106966	103779	168857	130660	26205.4	257628	77708.6	122208	140958	196880	60053.5	125527	115797	118992	92545.2	169129	128752	171266	130337	70544.9	120761	162666	216953	70372.7	50760.3	110428	129356	51225	107246	35782.3	37434.3	141625
P08962	CD63 antigen	CD63	1	1	163.012							766.93							240.252													165.009	370.888	3139.61	1027.58	507.634	823.834		4416.67		3251.02	1453.32	907.897	7575.09	2674.8	19.9834	1138.56	1340.19	393.295
P09001	39S ribosomal protein L3, mitochondrial	MRPL3	3	3	580.026	1623.77	3265.06	1163.02	98.6017	169.654	965.231	1801.98	4199.79			790.687	1446.52	1606.68	899.425	476.159	2633.91			1789.62			2755.83		167.935		187.733	807.083				1167.61	145.8	218.894			2258.51	5765.2	3170.51	3258.99			831.409	1062.46
P09012	U1 small nuclear ribonucleoprotein A	SNRPA	7	5	6332.64	10007.6	9499.58	6085.7	3008.57	15959	5748.54	11205.2	6933.76	8155.99	59428.5	6134.75	10749.8	11471.6	8738.32	5533.85	10467.9	4669.14	15521.3	22691.3	10074.2	25252.9	9106.6	12661.4	8803.81	5469.93	29891.1	12942.2	30409.3	18038.7	10396	17389.6	7432.11	11250.2	24678.6	40270.2	14686.3	10070.3	19490.5	17225.1	8949.97	20216.8	6162.84	12741.3	12453.1
P09086	POU domain, class 2, transcription factor 2	POU2F2	6	3	1139.31	6011.88	7374.17	7402.57	762.115	12410.1	4646.92	7959.92	14225.5	702.674		6807.39	7266.39	9087.37	8749.96	5934.95	15844.2	2863.63	11579.8	9389.22		2079.39	15228.3	4272.01	1519.93	4741.7	2589.72	3137.41	1317.26	1082.02	2103.24	6778.43	5779.16	5283.65	2429.66	8820.53	8886.26	3427.48	17446.5	3960.52	1770.16	5738.56	4276.05	1031.75	1945.33
P09104	Gamma-enolase	ENO2	25	21	35689	25223.8	28769.5	25026.3	155635	31157.2	19678.9	20880.6	39220.1	99113.5	472558	22533.1	20694.3	31601.3	27578.7	24730.5	27745.6	34520	55264.9	25616	203786	83299.3	33480.1	41236.7	177442	102244	47504.9	23283.3	40174.7	43980.1	109013	30544.5	88436.6	44065.9	336339	291570	17216.4	32281.6	39626.3	68717.9	113678	340239	53972	149425	419620
P09105	Hemoglobin subunit theta-1	HBQ1	2	2	10164.1		2033.09	1756.53	5358.38	17838.1	3296.1		4632.17			967.211		1021.92	1003.27	1957.14	4108.2			904.685			2308.21	3825.46		55866.7	6781.42	3959.3			31139		1529.56	2292.79		19117.8	4498.74		3171.95	8722.87	17931		827.346	2446.98	12426
P09110	3-ketoacyl-CoA thiolase, peroxisomal	ACAA1	10	10	19766.9	13785.8	17969.8	7893.57	17495.6	14302.3	11211.1	19268.3	56561.3	42877	54993.4	6107.88	7123.62	6860.53	8071.04	11531.8	12108	22812.4	24011.7	20321.6	35473.2	29107.5	30903.9	18311.2	9275.72	10744.2	11390.1	8722.25	7407.11	16671.1	19023.5	10703.9	8275	11487.5	11910.5	11298.9	11879.6	21233.2	8032.71	19709.2	15460.6	25195.6	10644.1	19275.5	32191.4
P09132	Signal recognition particle 19 kDa protein	SRP19	2	2		572.134	535.591			133.527	650.35	1	1	488.161		301.642	1150.96	524.023	1		541.618	315.904	254.242	132.723			1130.46	445.288				317.383	685.922			535.206	417.544	484.309			1338.15	436.536	1394.64		1		110.515	239.193	1
P09211	Glutathione S-transferase P	GSTP1	14	14	25301	16110.4	77609	37433	35678.9	26015.6	18097.4	9251.77	25804	30252.2	204098	25164.6	31103.1	41616.3	26038.1	16635.7	23373	10429.7	9630.48	14755.1	33756.9	35027.5	14341.9	29244.8	23212.2	15816.6	24842.9	11526.4	35397.8	27450	29126.8	35218.3	28607.4	38919.4	42683.1	21731.5	10404.8	22329.7	17982.8	15677.4	24961.8	30608.1	14834.9	32176.1	45107.6
P09234	U1 small nuclear ribonucleoprotein C	SNRPC	2	2		8094.1	6048.94	5410.95	836.439	3708.9	1846.12	5321.26	4734.55	957.38		4969.95	6213.34	9698.05	3929.54	1713.01	8756.15	1301.12	2328.18	9040.89			4780.62				2789.78	2177.46	1535.12	615.7	1231.74	4953.1	2101.53	2337.83		6765.62	3266.28	2231.73	2313.23	1285.58	852.425	971.959	1517.63	2272.67	2732.62
P09326	CD48 antigen	CD48	4	4	32618.7	6990.82	3373.43	7720.06	451.166	7460.83	3955.27	6383.9	21059	310.686	91930.3	2769.02	9309.51	2253.74	5450.96	3715.77	11662.5	7513.54	18072.7	16877.5	3425.03	14146.9	10323.6	6761.82	2559.92	138.258		4766.04	11996.2	22735.2	16348.6	5791.37	5430.68	3260.5		12554.6	5844.01	3200.19	16299.1	12027.6	3926.98		1579.5	376.189	5807.07
P09382	Galectin-1	LGALS1	10	10	53980.1	42682.8	34481.1	18668.5	46062.4	58658.6	80952.1	50116.2	169336	81027.5	443090	48515.4	43938.3	21424.4	42460.2	50953	13371.8	28644.5	121093	54413.1	112610	170518	53394.9	81930.4	395130	52685.2	93519.6	39469.7	159001	190425	420775	145402	129951	116394	277006	137442	16813.7	33948.5	17441.5	114894	204375	159646	57341.7	88050.1	372074
P09417	Dihydropteridine reductase	QDPR	9	9	8149.82	10091	5538.82	9933.74	39652.7	6330.53	7812.25	15010.6	18036.7	125134	779354	5453.25	4644.59	2869.06	9068.39	8124.29	11418.2	26133.3	5314.31	10706.4	121536	48326.9	8972.7	9265.78	84385.7	32803.1	10557.8	9185.35	17157.9	15118.9	53556.5	8488.36	57612.7	15712	49928.7	14369.5	4188.93	9170.18	12546.5	41189.9	101749	119797	44275.8	80034.3	216422
P09429	High mobility group protein B1	HMGB1	6	3	6855.03	8836.3	11448.8	8889.11	5339.85	35183.9	16171.9	18423.4	4719.14	8125.13	152415	14745.4	17233.4	49969.8	8636.79	6307.22	15167.3	3195.99	11624	19317.6	34020	14987.6	25320.1	9925.26	15247.1	13750.5	19414.3	10813.3	61573	25952.3	12882.4	13949.4	6643.64	11952.8	36310.3	15555.5	16389.3	12260.2	20541.3	11799.8	7429.74	9310.27	9020.19	14047.2	39067.6
P09455	Retinol-binding protein 1	RBP1	5	5	9423.43	10840.3	8318.3	9552.35	31269.1	5014.25	18297.9	11752.1	50895.4	102787	193879	44268.4	16571.7	4456.06	12756.5	20406.8	4672.51	23741	5339.71	12060.3	37997.2	86881.9	15149.1	27658.3	37996.9	28604.5	17095.4	4378.4	5905.91	8931.21	33549.1	3876.09	19761.2	6955.22	55608.5	28594.7	3042.98	5573.25	7548.88	9636.6	29171.6	50797.5	16728.2	40913.9	87561.1
P09467	Fructose-1,6-bisphosphatase 1	FBP1	2	2	1508.28	416.394	440.403	805.982	61.6372	1686.72	1121.54	204.696	1332.86			645.025	1059.33	338.768	667.581	617.489		1841.4	1411.1	1374.33		1.03109	1064	1353.05			358.133	249.692	2062.09	9006.23	8871.29	883.502	434.77	847.441	448.069		441.493			1598.47	236.542		98.3438
P09471	Guanine nucleotide-binding protein G(o) subunit alpha	GNAO1	13	13	9597.12	17492.6	22090.3	12670.5	317899	6806.94	4927.96	9182.98	15070.2	57365.5	1.07112e+06	17721	4359.03	1796.58	15600.6	11791.9	13686.9	99271	1688.97	12945.1	528371	80414.4	6547.55	41376.9	198201	36772	1784.89	21771.8	1307.52	874.67	9810.67	572.743	64917.7	45093.4	41907.5	5569.9	4743.51	19025.3	21481	18589.8	65660.9	188655	72792	240287	644780
P09486	SPARC	SPARC	3	3	4469.93	952.632	3553.49	1986.48	2569.56	916.374	3016.95	4529.71	22665.7	5698.58		2294.16	6546.31	4100.9	2014.3	5317.92	2648.68	801.565	2140.01	3893.2	4127.65	3089.52	3184.09	5556.14	7348.14	30368.5	10744.1	4851.94	2976.42	1085.51	17639.5	6527.11	2428.67	2184.3	87864	56367.5	2037.81	7993.73	5018.41	11043.8	5827.42	32506.2	3128.15	7721.62	24047.7
[truncated: 5,779 more rows]
[truncated: 59 more columns]

## Sheet: Peptide_quant
Sequence	Length	Protein accession	Protein description	Gene name	Charge	Unique [yes/no]	Intensity FFPE_1	Intensity FFPE_2	Intensity FFPE_3	Intensity FFPE_4	Intensity FFPE_5	Intensity FFPE_6	Intensity FFPE_7	Intensity FFPE_8	Intensity FFPE_9	Intensity FFPE_10	Intensity FFPE_11	Intensity FFPE_12	Intensity FFPE_13	Intensity FFPE_14	Intensity FFPE_15	Intensity FFPE_16	Intensity FFPE_17	Intensity FFPE_18	Intensity FFPE_19	Intensity FFPE_20	Intensity FFPE_21	Intensity FFPE_22	Intensity FFPE_23	Intensity FFPE_24	Intensity FFPE_25	Intensity FFPE_26	Intensity FFPE_27	Intensity FFPE_28	Intensity FFPE_29	Intensity FFPE_30	Intensity FFPE_31	Intensity FFPE_32	Intensity FFPE_33	Intensity FFPE_34	Intensity FFPE_35	Intensity FFPE_36	Intensity FFPE_37	Intensity FFPE_38	Intensity FFPE_39	Intensity FFPE_40	Intensity FFPE_41	Intensity FFPE_42	Intensity FFPE_43
[truncated: 45,703 more rows]
[truncated: 9 more columns]
