# Supplementary material for: Proteomic Landscape Uncovers Chemotherapy Resistance, Relapse Mechanisms, and Molecular Subtypes in Primary Central Nervous System Lymphoma for Precision Therapeutics
Source: Research Square preprint supplement (doi:10.21203/rs.3.rs-6419495/v1), 2025-04-11
Supplement: Supplementary file 3 [file f95fc0eca94180f3a8bdaab8.xlsx]

## Sheet: sheet 1
sample No	sybtype	patient No.	gender	age	CR	MTX_DR	LDH level（135-225）	KPS score	ECOG score	IELSG score (low1/intermediate2/High3)	IELSG score	involvement of deep lesions (Corpus callosum, basal ganglia, brainstem, cerebellum)	multiple lesions	Tumor location	MSKCC scores (class I/II/III)	ONLY MTX	ALL CYCLE	treatment combo	Methotrexate（MTX/M）	Rituximab（R）	Cytarabine（A）	Temozolomide（TMZ/T）	Etoposide（E）	Doxorubicin（P）	Lenalidomide（LNDA）	PFS months	PFS status	OS months	OS status		Hans model	CD10	BCL-6	MUM1	CD20	PAX5	BCL-2	c-MYC	Ki67	IRF4
1	1	92897	Male	45	yes	yes	189	80	1	1	0	0	0	Left temporal lobe	1	1	5	M	1	0	0	0	0	0	0	51	0	51	0						1				0.8
2	1	113208	Male	66	yes	yes	179.8	80	1	2	2	1	0	Right temporo-occipital lobes	2	1	14	M	1	0	0	0	0	0	0	36	1	44	1		nonGCB	0	1	1	1				0.5
3	1	113299	Male	51	yes	yes	191.1	90	1	1	1	1	1	Corpus callosum, left thalamus, third ventricle, left lateral ventricle	2	1	12	M	1	0	0	0	0	0	0	31	1	79	1						1
4	1	129635	Male	56	yes	yes	173.1	80	1	1	0	0	1	Right frontoparietal lobes	2	1	9	M	1	0	0	0	0	0	0	19	1	23	1
5	1	129763	Female	53	yes	yes	163.2	70	2	2	2	1	1	Right frontotemporal and insular lobes	2	1	14	M	1	0	0	0	0	0	0	49	1	57	1
6	1	135008	Female	64	yes	yes	354.1	80	1	2	3	1	1	Bilateral frontal lobes and corpus callosum	2	0	12	MR	1	1	0	0	0	0	0	36	0	46	1			0	1		1		1		0.7
7	1	137883	Female	55	yes	yes	151	70	2	1	1	0	0	Optic tract, optic chiasm	2	1	11	M	1	0	0	0	0	0	0	30	0	30	0		nonGCB	0	0	0	1		1		0.75
8	1	139415	Female	56	yes	yes	291.5	80	1	2	2	1	0	Bilateral anterior horns of the lateral ventricles ventricles	2	0	10	MRA	1	1	1	0	0	0	0	30	1	40	1
9	1	142808	Male	55	yes	yes	150.6	50	3	2	2	1	1	Right basal ganglia region	3	0	10	M	1	0	0	0	0	0	0	16	1	21	1		nonGCB	0	1	1	1		1	1	0.6
10	1	616323	Female	56	yes	yes	164.7	50	3	2	2	1	1	Left parietal lobe	3	0	4	ML	1	0	0	0	0	0	1	27	1	27	0		nonGCB	0	1	1	1		>50%	0.4	0.85
11	1	628617	Male	44	yes	yes	NA	30	4	NA	NA	1	1	Left temporal lobe, basal ganglia, thalamus, cerebellum, brainstem	1	0	10	MRTL	1	1	0	1	0	0	1	26	0	26	0		nonGCB	0	1	1	1		>50%	>40%	0.9
12	1	155680	Female	39	yes	yes	250.6	60	3	2	2	0	0	Right temporal lobe	1	0	6	MTL	1	0	0	1	0	0	1	13	1	20	1		nonGCB	0	1	1	1	1	0.5	0.5	0.9
13	1	635463	Male	32	no	yes	184.5	70	2	2	2	1	1	Bilateral frontal lobes, right thalamus	1	0	10	MRTL	1	1	0	1	0	0	1	12	1	22	1		GCB	1	1	0	1	1	>50%	>40%	0.9
14	1	655327	Male	43	yes	yes	167.6	90	1	1	1	1	1	Corpus callosum, bilateral parieto-occipital lobes	1	0	11	MRTL	1	1	0	1	0	0	1	14	0	14	0		GCB	1	1	0	1	1	0	0.5	0.9
15	1	166369	Female	48	yes	yes	175.7	80	1	1	0	0	1	Left frontoparietal lobes	1	0	3	MRT	1	1	0	1	0	0	0	17	0	17	0		GCB	1	1	1	1	1	0	0.5	0.8
16	1	93900	Female	60	yes	yes	259	50	3	2	3	0	0	Corpus callosum	3	1	9	M	1	0	0	0	0	0	0	27	1	54.5	1						1				0.6
17	1	131492	Female	70	no	yes	239.4	60	3	2	3	0	0	Left frontoparietal lobes	3	0	7	MR	1	1	0	0	0	0	0	64	1	64	0
18	1	132727	Female	59	yes	yes	142.3	80	1	1	0	0	0	Left frontoparietal lobes	2	1	11	M	1	0	0	0	0	0	0	64	0	64	0
19	1	135881/80291	Female	46	yes	yes	144	70	2	1	1	0	0	Right parieto-occipital lobes	1	1	12	M	1	0	0	0	0	0	0	118	0	118	0						1
20	1	143408	Male	58	yes	yes	205.3	70	2	2	2	1	1	Splenium of corpus callosum	2	0	16	MRTL	1	1	0	1	0	0	1	49.5	0	49.5	0		nonGCB	0	1	1	1		1	0.8	0.9
21	1	155687	Male	53	yes	yes	NA	90	1	NA	NA	0	0	Right pons	2	0	8	MRTL	1	1	0	1	0	0	1	29	0	29	0
22	2	607450	Female	46	yes	yes	222.6	80	1	1	1	1	1	Left frontal lobe, genu of corpus callosum	1	0	10	MRTL	1	1	0	1	0	0	1	19	1	28	1		GCB	1	1	1	1	1	1	0.4	0.85
23	3	152113	Female	66	yes	yes	176.6	90	1	1	1	0	0	Right temporal lobe	2	0	11	MRAE	1	1	1	0	1	0	0	36	0	36	0
24	3	144029	Female	56	yes	yes	196.6	60	3	1	1	0	0	Left frontal lobe	3	0	9	MRA	1	1	1	0	0	0	0	41	0	41	0
25	3	117448/472770	Female	61	yes	no	155.9	70	2	2	2	0	0	Left frontotemporal lobes	2	1	6									6	1	14	1				1	1	1				0.4
26	3	126896	Male	34	yes	no	NA	80	1	NA	NA	0	0	Bilateral frontal lobes	1	0	5	M	1	0	0	0	0	0	0	4.5	1	15	1
27	3	127283	Male	53	yes	no	186.4	80	1	1	1	1	1	Left frontal lobe, cingulate gyrus, genu of corpus callosum	2	1	6	M	1	0	0	0	0	0	0	6.5	1	18	1
28	3	128269	Female	72	no	no	NA	90	1	NA	NA	1	1	Right temporoparietal lobes, splenium of corpus callosum, periventricular region of fourth ventricle, around the right lateral ventricle trigone, optic chiasm, pituitary stalk	2	1	4	M	1	0	0	0	0	0	0	2	1	8	1
29	3	129319	Male	57	yes	no	138.9	60	3	2	2	1	1	Suprasellar region, intraventricular dissemination	3	0	6	M	1	0	0	0	0	0	0	5	1	11	1
30	3	129638	Female	54	no	no	277.8	40	4	2	3	1	0	Left frontal lobe, corpus callosum	3	0	7	M	1	0	0	0	0	0	0	2	1	6	1			0	1		1	1	1		0.8
31	1	133853	Male	72	yes	no	232.1	20	4	2	3	1	1	Right temporal lobe, left frontal lobe	3	0	3	MR	1	1	0	0	0	0	0	6	1	14	1		nonGCB	0	1	1	1		1		0.95
32	1	138477	Female	33	no	no	258.3	60	3	2	3	1	0	Lateral ventricles, corpus callosum	1	0	6	MRA	1	1	1	0	0	0	0	6	1	11	1
33	2	146283	Female	67	no	no	206.2	60	3	2	3	1	1	Right frontal lobe, corpus callosum	3	0	4	M	1	0	0	0	0	0	0	2.5	1	9	1
34	2	146780	Male	59	yes	no	315.2	80	1	2	2	1	1	Right anterior horn of lateral ventricle, corpus callosum	2	1	8	M	1	0	0	0	0	0	0	9.5	1	18	1		GCB	1	1	1	1	1	>50%	>40%	0.95
35	2	148055	Male	61	no	no	133.4	60	3	2	2	0	0	Left temporal lobe	3	0	8	MRAPL	1	1	1	0	0	1	1	5	1	12	1
36	2	625823	Male	65	yes	no	254.6	50	3	2	3	0	0	Right parietal lobe	3	0	5	MRTL	1	1	0	1	0	0	1	7	1	14	1		nonGCB	0	1	1	1	1	>50%	>40%	0.9
37	2	154964	Male	62	no	no	NA	60	3	NA	NA	1	1	Left thalamus, midbrain	3	0	6	MRTL	1	1	0	1	0	0	1	3	1	8	1		GCB
38	2	154960	Female	57	no	no	218.8	90	1	1	1	1	1	Right occipital lobe, right temporal lobe, left basal ganglia	2	0	3	MRT	1	1	0	1	0	0	0	3	1	12	1
39	2	155640	Female	44	yes	no	NA	90	1	NA	NA	0	1	Left frontal lobe, basal ganglia	1	0	9	MTL	1	0	0	1	0	0	1	11	1	25	1
40	2	158822	Male	57	yes	no	209.6	80	1	1	1	1	0	Left temporoparietal lobes	2	0	6	MRTL	1	1	0	1	0	0	1	4.5	1	10.5	1		GCB
41	2	160026	Female	50	no	no	221.2	70	2	2	2	1	1	Corpus callosum, lateral ventricles	2	0	3	MRT	1	1	0	1	0	0	0	3	1	9	1		GCB						1	0.3
42	2	656379	Male	70	no	no	176.2	40	4	2	2	0	0	Left frontal lobe	3	0	4	MRA	1	1	1	0	0	0	0	4	1	10	1		nonGCB	0	1	1	1	1	0.9	0.5	0.9
43	4	161494	Female	61	yes	no	156.8	20	4	2	3	1	1	Right splenium of corpus callosum, basal ganglia	3	0	3	MRA	1	1	1	0	0	0	0	2.5	1	11	1		GCB
44	4	167642	Male	46	yes	no	200.5	40	4	2	2	1	0	Left frontal lobe	1	0	2	MRA	1	1	1	0	0	0	0	1.5	1	5	1		GCB						0.8	0.4
45	4	168725	Male	55	yes	no	214.3	80	1	1	1	1	1	Right frontotemporal lobe, lateral ventricles, corpus callosum	2	0	8	MRA	1	1	1	0	0	0	0	10	1	17	1		nonGCB
46	4	151222	Male	56	yes	no	182.1	40	4	2	2	1	1	Corpus callosum, cingulate gyrus, lateral ventricles	3	0	3	MRT	1	1	1	0	0	0	0	4	1	14	1
47	4	167400	Male	35	yes	yes	211.3	80	1	1	1	1	1	Corpus callosum, lateral ventricular horns, bilateral frontal lobes	1	0	11	MRATE	1	1	1	1	1	0	0	15	0	15	0		GCB
48	3	156932片	Female	59	no	yes	149.5	80	1	1	0	0	0	Left frontal lobe, corpus callosum, basal ganglia	2	0	13	MRTL	1	1	0	1	0	0	1	15	1	21	1						1
49	4	154360片	Female	42	yes	yes	NA	80	1	NA	NA	1	0	Optic chiasm	1	0	7	ML	1	0	0	0	0	0	1	19.5	0	19.5	0		GCB
50	4	156133片	Male	51	yes	yes	NA	70	2	NA	NA	1	0	Left basal ganglia	2	0	10	MRTL	1	1	0	1	0	0	1	14	0	14	0		GCB						1	1
51	4	158157片	Female	46	yes	yes	412.2	80	1	2	2	1	1	Right temporoparieto-occipital lobes	1	0	8	MRTL	1	1	0	1	0	0	1	17	0	17	0
52	4	152270片	Female	54	no	no	165.2	50	3	2	2	1	1	Right frontotemporal lobes, basal ganglia	3	0	3	MRA	1	1	1	0	0	0	0	4.5	1	11.5	1		GCB		1				1	1
